# Supplementary material
Source: PubMed Central journal article supplement (PMC4227558)
Supplement: pr500558y_si_001.pdf [file pr500558y_si_001.pdf]

Supplemental Table 1. Complete list of 3882 proteins identified from mouse retina tissue (False Discovery Rate < 1%).

| N  | Accession #            | Protein Name                                                          | Unused Score | %coverage | Peptides(95%) |
|----|------------------------|-----------------------------------------------------------------------|--------------|-----------|---------------|
| 1  | IPI:IPI00757353.2      | Spna2 spectrin alpha chain, brain isoform 2                           | 285.83       | 62.29     | 186           |
| 2  | IPI:IPI00462072.3      | Eno1;LOC100044223;Gm5506 Alpha-enolase                                | 238.22       | 85.25     | 457           |
| 3  | IPI:IPI00119876.1      | Dync1h1 Cytoplasmic dynein 1 heavy chain 1                            | 189.19       | 33.51     | 148           |
| 4  | IPI:IPI00319830.7      | Spnb2 Isoform 1 of Spectrin beta chain, brain 1                       | 162.32       | 44.86     | 98            |
| 5  | IPI:IPI00407130.4      | Pkm2 Isoform M2 of Pyruvate kinase isozymes M1/M2                     | 159.24       | 80.98     | 234           |
| 6  | IPI:IPI00309361.6      | Rbp3 Retinol-binding protein 3                                        | 152.76       | 62.24     | 159           |
| 7  | IPI:IPI00169916.1<br>1 | Cltc Clathrin heavy chain 1                                           | 152.32       | 48.24     | 173           |
| 8  | IPI:IPI00136703.1      | Ckb Creatine kinase B-type                                            | 134.94       | 87.14     | 238           |
| 9  | IPI:IPI00874964.3      | - 36 kDa protein                                                      | 134.51       | 78.64     | 253           |
| 10 | IPI:IPI00122048.2      | Atp1a3 Sodium/potassium-transporting ATPase subunit alpha-3           | 134.48       | 59.33     | 175           |
| 11 | IPI:IPI00229940.4      | Sag S-arrestin                                                        | 131.68       | 89.08     | 249           |
| 12 | IPI:IPI00323357.3      | Hspa8 Heat shock cognate 71 kDa protein                               | 127.73       | 76.16     | 137           |
| 13 | IPI:IPI00169463.1      | Tubb2c Tubulin beta-2C chain                                          | 126.64       | 78.43     | 230           |
| 14 | IPI:IPI00330804.4      | Hsp90aa1 Heat shock protein HSP 90-alpha                              | 122.42       | 60.85     | 95            |
| 15 | IPI:IPI00131695.3      | Alb Serum albumin                                                     | 119.29       | 56.58     | 94            |
| 16 | IPI:IPI00850779.1      | Gm2606 similar to Glyceraldehyde-3-phosphate dehydrogenase isoform 1  | 119.19       | 79.58     | 187           |
| 17 | IPI:IPI00828488.1      | Hnrnpa2b1 Isoform 1 of Heterogeneous nuclear ribonucleoproteins A2/B1 | 99.54        | 74.22     | 94            |
| 18 | IPI:IPI00130280.1      | Atp5a1 ATP synthase subunit alpha, mitochondrial                      | 99.52        | 60.04     | 130           |
| 19 | IPI:IPI00468481.2      | Atp5b ATP synthase subunit beta, mitochondrial                        | 99.18        | 77.32     | 183           |
| 20 | IPI:IPI00469114.5      | Hba-a1 Hemoglobin subunit alpha                                       | 99.12        | 94.37     | 149           |
| 21 | IPI:IPI00656325.2      | Nsf Vesicle-fusing ATPase                                             | 98.6         | 60.08     | 69            |
| 22 | IPI:IPI00227299.6      | Vim Vimentin                                                          | 98.29        | 75.54     | 97            |
| 23 | IPI:IPI00415402.3      | Stxbp1 Isoform 1 of Syntaxin-binding protein 1                        | 96.79        | 66.33     | 88            |
| 24 | IPI:IPI00108737.1      | Cryaa Isoform 1 of Alpha-crystallin A chain                           | 96.52        | 84.69     | 88            |
| 25 | IPI:IPI00225275.5      | Pygm Glycogen phosphorylase, muscle form                              | 94.97        | 52.61     | 64            |
| 26 | IPI:IPI00876255.1      | Nsf 83 kDa protein                                                    | 94.28        | 57.80     | 65            |
| 27 | IPI:IPI00109729.1      | Cryaa Isoform 2 of Alpha-crystallin A chain                           | 93.04        | 87.28     | 84            |
| 28 | IPI:IPI00626790.3      | Glul Glutamine synthetase                                             | 92.71        | 80.97     | 143           |
| 29 | IPI:IPI00555069.3      | Pgk1 Phosphoglycerate kinase 1                                        | 92.5         | 73.86     | 95            |
| 30 | IPI:IPI00222211.5      | Crybb2 Beta-crystallin B2                                             | 92.18        | 87.32     | 99            |
| 31 | IPI:IPI00110753.1      | Tuba1a Tubulin alpha-1A chain                                         | 91.37        | 78.49     | 163           |
| 32 | IPI:IPI00138274.1      | Cryab Alpha-crystallin B chain                                        | 91.26        | 95.43     | 95            |
| 33 | IPI:IPI00622235.5      | Vcp Transitional endoplasmic reticulum ATPase                         | 91.23        | 63.52     | 80            |

|    |                   |                                                               |       |       |     |
|----|-------------------|---------------------------------------------------------------|-------|-------|-----|
| 34 | IPI:IPI00122971.2 | Ncam1 Isoform 1 of Neural cell adhesion molecule 1            | 91.1  | 46.46 | 72  |
| 35 | IPI:IPI00856379.1 | Aldoa fructose-bisphosphate aldolase A isoform 1              | 90.91 | 79.19 | 96  |
| 36 | IPI:IPI00110850.1 | Actb Actin, cytoplasmic 1                                     | 89.27 | 79.47 | 152 |
| 37 | IPI:IPI00330289.3 | Epb4.1l2 band 4.1-like protein 2                              | 87.75 | 55.47 | 66  |
| 38 | IPI:IPI00123313.1 | Uba1 Ubiquitin-like modifier-activating enzyme 1              | 87.1  | 48.2  | 88  |
| 39 | IPI:IPI00117348.4 | Tuba1b Tubulin alpha-1B chain                                 | 87.09 | 71.62 | 189 |
| 40 | IPI:IPI00553333.2 | Hbb-b1 Hemoglobin subunit beta-1                              | 86.76 | 95.24 | 140 |
| 41 | IPI:IPI00114375.2 | Dpysl2 Dihydropyrimidinase-related protein 2                  | 86.61 | 70.63 | 91  |
| 42 | IPI:IPI00762858.1 | Hk1 hexokinase-1 isoform HK1                                  | 86.1  | 46.51 | 59  |
| 43 | IPI:IPI00116074.1 | Aco2 Aconitate hydratase, mitochondrial                       | 85.16 | 55.64 | 86  |
| 44 | IPI:IPI00467833.6 | Tpi1 triosephosphate isomerase                                | 84.92 | 69.9  | 97  |
| 45 | IPI:IPI00137409.3 | Tkt Transketolase                                             | 84.15 | 58.75 | 92  |
| 46 | IPI:IPI00465648.3 | Dnm1 Isoform 3 of Dynamin-1                                   | 81.11 | 48.77 | 63  |
| 47 | IPI:IPI00118899.1 | Actn4 Alpha-actinin-4                                         | 80.71 | 51.75 | 49  |
| 48 | IPI:IPI00139788.2 | Trf Serotransferrin                                           | 80.26 | 52.51 | 52  |
| 49 | IPI:IPI00760082.2 | Crocc rootletin isoform 1                                     | 80.14 | 27.78 | 53  |
| 50 | IPI:IPI00311654.4 | Atp2a1 Sarcoplasmic/endoplasmic reticulum calcium ATPase 1    | 79.74 | 39.54 | 64  |
| 51 | IPI:IPI00117312.1 | Got2 Aspartate aminotransferase, mitochondrial                | 77.79 | 73.95 | 70  |
| 52 | IPI:IPI00751369.1 | Ldha L-lactate dehydrogenase A chain isoform 2                | 77.27 | 75.07 | 91  |
| 53 | IPI:IPI00308885.6 | Hspd1 Isoform 1 of 60 kDa heat shock protein, mitochondrial   | 76.89 | 71.90 | 71  |
| 54 | IPI:IPI00928559.1 | Hk1 Putative uncharacterized protein                          | 75.53 | 43.84 | 46  |
| 55 | IPI:IPI00228633.7 | Gpi1 Glucose-6-phosphate isomerase                            | 75.13 | 56.27 | 82  |
| 56 | IPI:IPI00874482.1 | Actg1 Actin, cytoplasmic 2                                    | 74.21 | 76.53 | 113 |
| 57 | IPI:IPI00554989.3 | Ppia Peptidyl-prolyl cis-trans isomerase                      | 73.49 | 74.85 | 85  |
| 58 | IPI:IPI00406447.3 | Dpysl3 Collapsin response mediator protein 4A                 | 72.67 | 69.25 | 94  |
| 59 | IPI:IPI00331704.7 | Eno2 Gamma-enolase                                            | 71.48 | 74.19 | 184 |
| 60 | IPI:IPI00127596.1 | Ckm Creatine kinase M-type                                    | 71.01 | 79.27 | 83  |
| 61 | IPI:IPI00828309.1 | Crocc rootletin isoform 2                                     | 71    | 25.96 | 40  |
| 62 | IPI:IPI00466069.3 | Eef2 Elongation factor 2                                      | 70.77 | 48.02 | 46  |
| 63 | IPI:IPI00230108.6 | Pdia3 Protein disulfide-isomerase A3                          | 69.26 | 62.77 | 46  |
| 64 | IPI:IPI00133522.1 | P4hb Protein disulfide-isomerase                              | 68.99 | 70.73 | 44  |
| 65 | IPI:IPI00122815.3 | P4hb Putative uncharacterized protein                         | 66.56 | 71.12 | 47  |
| 66 | IPI:IPI00129526.1 | Hsp90b1 Endoplasmic                                           | 66.34 | 41.27 | 50  |
| 67 | IPI:IPI00407692.3 | Atp6v1a Isoform 1 of V-type proton ATPase catalytic subunit A | 66.24 | 51.05 | 61  |
| 68 | IPI:IPI00880647.1 | Pde6a Phosphodiesterase 6A, cGMP-specific, rod, alpha         | 66.02 | 41.51 | 41  |
| 69 | IPI:IPI00457898.3 | Pgam1 Phosphoglycerate mutase 1                               | 65.79 | 82.28 | 98  |
| 70 | IPI:IPI00319992.1 | Hspa5 78 kDa glucose-regulated protein                        | 65.65 | 59.54 | 58  |

|     |                   |                                                                               |       |       |    |
|-----|-------------------|-------------------------------------------------------------------------------|-------|-------|----|
| 71  | IPI:IPI00515398.1 | Myh10 Myosin-10                                                               | 64.7  | 24.65 | 44 |
| 72  | IPI:IPI00929850.1 | Pgm1;Pgm2 phosphoglucomutase-1                                                | 64.65 | 68.86 | 40 |
| 73  | IPI:IPI00115679.1 | Ganab Isoform 2 of Neutral alpha-glucosidase AB                               | 64.34 | 38.51 | 46 |
| 74  | IPI:IPI00762047.1 | Acly ATP-citrate synthase                                                     | 64.12 | 38.96 | 41 |
| 75  | IPI:IPI00115564.5 | Slc25a4 ADP/ATP translocase 1                                                 | 63.93 | 67.79 | 49 |
| 76  | IPI:IPI00230394.5 | Lmnb1 Lamin-B1                                                                | 63.66 | 54.93 | 54 |
| 77  | IPI:IPI00896700.1 | Mtap1b microtubule-associated protein 1B                                      | 63.25 | 24.55 | 47 |
| 78  | IPI:IPI00113223.2 | Fasn Fatty acid synthase                                                      | 62.85 | 23.08 | 42 |
| 79  | IPI:IPI00137730.7 | Pebp1 Phosphatidylethanolamine-binding protein 1                              | 62.22 | 94.12 | 86 |
| 80  | IPI:IPI00120716.3 | Gnb1 Guanine nucleotide-binding protein G(I)/G(S)/G(T) subunit beta-1         | 61.35 | 75.29 | 67 |
| 81  | IPI:IPI00378436.1 | Crygb Putative uncharacterized protein                                        | 60.48 | 78.29 | 91 |
| 82  | IPI:IPI00126248.3 | Acly Putative uncharacterized protein                                         | 60.07 | 34.51 | 33 |
| 83  | IPI:IPI00224575.1 | Hnrnpk Isoform 2 of Heterogeneous nuclear ribonucleoprotein K                 | 58.97 | 67.24 | 49 |
| 84  | IPI:IPI00323592.2 | Mdh2 Malate dehydrogenase, mitochondrial                                      | 58.49 | 67.75 | 58 |
| 85  | IPI:IPI00387312.2 | Pfkl 6-phosphofructokinase, liver type                                        | 58.04 | 37.82 | 37 |
| 86  | IPI:IPI00119113.3 | Atp6v1b2 V-type proton ATPase subunit B, brain isoform                        | 57.45 | 71.43 | 56 |
| 87  | IPI:IPI00626237.2 | Ogdh Isoform 1 of 2-oxoglutarate dehydrogenase, mitochondrial                 | 57.33 | 38.81 | 34 |
| 88  | IPI:IPI00339468.4 | Dhx9 Isoform 2 of ATP-dependent RNA helicase A                                | 57.01 | 26.16 | 42 |
| 89  | IPI:IPI00119618.1 | Canx Calnexin                                                                 | 56.73 | 52.79 | 41 |
| 90  | IPI:IPI00453826.2 | Matr3 Matrin-3                                                                | 56.08 | 34.75 | 40 |
| 91  | IPI:IPI00323179.3 | Gdi1 Rab GDP dissociation inhibitor alpha                                     | 55.87 | 63.09 | 39 |
| 92  | IPI:IPI00553798.2 | Ahnak AHNAK nucleoprotein isoform 1                                           | 55.64 | 31.9  | 43 |
| 93  | IPI:IPI00311682.5 | Atp1a1 Sodium/potassium-transporting ATPase subunit alpha-1                   | 55.47 | 44.67 | 96 |
| 94  | IPI:IPI00653307.1 | Ddx17 probable ATP-dependent RNA helicase DDX17 isoform 1                     | 55.41 | 36.35 | 34 |
| 95  | IPI:IPI00230204.7 | Got1 Aspartate aminotransferase, cytoplasmic                                  | 55.19 | 75.06 | 64 |
| 96  | IPI:IPI00554941.2 | Crygb Gamma-crystallin B                                                      | 55.03 | 78.29 | 90 |
| 97  | IPI:IPI00123639.1 | Calr Calreticulin                                                             | 54.08 | 74.28 | 42 |
| 98  | IPI:IPI00230351.1 | Sdha Succinate dehydrogenase [ubiquinone] flavoprotein subunit, mitochondrial | 54.04 | 52.41 | 34 |
| 99  | IPI:IPI00877254.1 | Slc12a5 Isoform 1 of Solute carrier family 12 member 5                        | 53.8  | 28.65 | 34 |
| 100 | IPI:IPI00317710.1 | Hspa4l Isoform 1 of Heat shock 70 kDa protein 4L                              | 53.26 | 39.98 | 34 |
| 101 | IPI:IPI00462934.2 | Khsrp Far upstream element-binding protein 2                                  | 52.7  | 48.93 | 41 |
| 102 | IPI:IPI00121514.3 | Stip1 Stress-induced-phosphoprotein 1                                         | 52.49 | 42.17 | 31 |
| 103 | IPI:IPI00230427.5 | Mif Macrophage migration inhibitory factor                                    | 52.25 | 74.78 | 53 |
| 104 | IPI:IPI00122565.1 | Gdi2 Isoform 1 of Rab GDP dissociation inhibitor beta                         | 51.92 | 56.18 | 37 |

|     |                   |                                                                                           |       |       |    |
|-----|-------------------|-------------------------------------------------------------------------------------------|-------|-------|----|
| 105 | IPI:IPI00308162.3 | Slc25a12 Calcium-binding mitochondrial carrier protein Aralar1                            | 50.96 | 51.4  | 32 |
| 106 | IPI:IPI00420882.3 | Ogdh Isoform 4 of 2-oxoglutarate dehydrogenase, mitochondrial                             | 50.79 | 29.21 | 28 |
| 107 | IPI:IPI00123390.8 | Acsf6 Isoform 2 of Long-chain-fatty-acid--CoA ligase 6                                    | 50.67 | 38.64 | 29 |
| 108 | IPI:IPI00317794.5 | Ncl Nucleolin                                                                             | 50.51 | 30.27 | 31 |
| 109 | IPI:IPI00130000.2 | Npepps Puromycin-sensitive aminopeptidase                                                 | 50.4  | 39.78 | 31 |
| 110 | IPI:IPI00119689.1 | Ap2b1 Isoform 1 of AP-2 complex subunit beta                                              | 50.25 | 31.91 | 31 |
| 111 | IPI:IPI00122549.1 | Vdac1 Isoform PI-VDAC1 of Voltage-dependent anion-selective channel protein 1             | 50.24 | 77.36 | 42 |
| 112 | IPI:IPI00817004.1 | Hnrnpa1 Isoform Long of Heterogeneous nuclear ribonucleoprotein A1                        | 49.99 | 60.94 | 58 |
| 113 | IPI:IPI00880839.1 | Hspa9 stress-70 protein, mitochondrial                                                    | 49.49 | 40.65 | 33 |
| 114 | IPI:IPI00111218.1 | Aldh2 Aldehyde dehydrogenase, mitochondrial                                               | 49.41 | 56.07 | 31 |
| 115 | IPI:IPI00407499.1 | Abat Isoform 1 of 4-aminobutyrate aminotransferase, mitochondrial                         | 49.35 | 58.8  | 38 |
| 116 | IPI:IPI00875275.1 | Abca8a ATP-binding cassette, sub-family A (ABC1), member 8a                               | 49.3  | 22.35 | 37 |
| 117 | IPI:IPI00126051.7 | Crybb1 Beta-crystallin B1                                                                 | 49.19 | 90.0  | 59 |
| 118 | IPI:IPI00226080.5 | Rlbp1 Retinaldehyde-binding protein 1                                                     | 49.02 | 72.56 | 60 |
| 119 | IPI:IPI00224456.2 | Srl Isoform 1 of Sarcalumenin                                                             | 48.97 | 30.44 | 30 |
| 120 | IPI:IPI00119138.1 | Uqcrc2 Cytochrome b-c1 complex subunit 2, mitochondrial                                   | 48.89 | 57.62 | 40 |
| 121 | IPI:IPI00269661.1 | Hnrnpa3 Isoform 1 of Heterogeneous nuclear ribonucleoprotein A3                           | 48.88 | 47.76 | 50 |
| 122 | IPI:IPI00845652.1 | Ogdh Isoform 3 of 2-oxoglutarate dehydrogenase, mitochondrial                             | 48.54 | 31.79 | 29 |
| 123 | IPI:IPI00330646.4 | Gnat1 Guanine nucleotide-binding protein G(t) subunit alpha-1                             | 48.35 | 58.29 | 69 |
| 124 | IPI:IPI00320217.9 | Cct2 T-complex protein 1 subunit beta                                                     | 48.26 | 59.07 | 31 |
| 125 | IPI:IPI00331556.5 | Hspa4 Heat shock 70 kDa protein 4                                                         | 48.25 | 37.46 | 32 |
| 126 | IPI:IPI00336324.1 | Mdh1 Malate dehydrogenase, cytoplasmic                                                    | 48.01 | 53.59 | 41 |
| 127 | IPI:IPI00465769.3 | Slc12a5 Isoform 2 of Solute carrier family 12 member 5                                    | 47.93 | 26.01 | 30 |
| 128 | IPI:IPI00310091.8 | Ppp2r1a Serine/threonine-protein phosphatase 2A 65 kDa regulatory subunit A alpha isoform | 47.63 | 49.24 | 32 |
| 129 | IPI:IPI00890005.1 | Hnrnpk Isoform 3 of Heterogeneous nuclear ribonucleoprotein K                             | 47.62 | 58.31 | 44 |
| 130 | IPI:IPI00265406.3 | Pfas Phosphoribosylformylglycinamide synthase                                             | 47.46 | 32.76 | 28 |
| 131 | IPI:IPI00420363.2 | Ddx5 Probable ATP-dependent RNA helicase DDX5                                             | 47.28 | 44.63 | 39 |
| 132 | IPI:IPI00116498.1 | Ywhaz 14-3-3 protein zeta/delta                                                           | 47.2  | 83.67 | 61 |
| 133 | IPI:IPI00649253.1 | Pgm1;Pgm2 Phosphoglucomutase 2                                                            | 47.2  | 49.66 | 25 |

|     |                   |                                                                                |       |       |    |
|-----|-------------------|--------------------------------------------------------------------------------|-------|-------|----|
| 134 | IPI:IPI00307837.6 | Eef1a1 Elongation factor 1-alpha 1                                             | 47.12 | 56.49 | 41 |
| 135 | IPI:IPI00556827.1 | Atp2b1 plasma membrane calcium ATPase 1                                        | 47.1  | 26.56 | 31 |
| 136 | IPI:IPI00554894.2 | Anxa6 Annexin A6                                                               | 47.01 | 42.05 | 26 |
| 137 | IPI:IPI00895996.1 | Dpysl4 dihydropyrimidinase-related protein 4                                   | 46.95 | 69.41 | 40 |
| 138 | IPI:IPI00653598.2 | Uqcrc1 cytochrome b-c1 complex subunit 1, mitochondrial precursor              | 46.88 | 53.96 | 44 |
| 139 | IPI:IPI00119458.7 | Aldoc Fructose-bisphosphate aldolase C                                         | 46.87 | 83.47 | 68 |
| 140 | IPI:IPI00458583.3 | Hnrnpu Heterogeneous nuclear ribonucleoprotein U                               | 46.75 | 31.25 | 33 |
| 141 | IPI:IPI00132595.4 | Abca4 Retinal-specific ATP-binding cassette transporter                        | 46.6  | 16.88 | 31 |
| 142 | IPI:IPI00130922.3 | Crygs Beta-crystallin S                                                        | 46.55 | 73.60 | 57 |
| 143 | IPI:IPI00116283.1 | Cct3 T-complex protein 1 subunit gamma                                         | 46.39 | 49.54 | 31 |
| 144 | IPI:IPI00480357.6 | Hnrnmp Isoform 2 of Heterogeneous nuclear ribonucleoprotein M                  | 46.34 | 43.62 | 35 |
| 145 | IPI:IPI00128441.3 | Hnrnpr Putative uncharacterized protein                                        | 45.61 | 34.18 | 28 |
| 146 | IPI:IPI00555059.2 | Prdx6 Peroxiredoxin-6                                                          | 45.57 | 81.25 | 51 |
| 147 | IPI:IPI00896727.1 | Cand1 Cullin-associated NEDD8-dissociated protein 1                            | 45.26 | 30.73 | 39 |
| 148 | IPI:IPI00229796.3 | Pygb Glycogen phosphorylase, brain form                                        | 45.14 | 39.62 | 41 |
| 149 | IPI:IPI00132443.3 | Hnrnmp Isoform 1 of Heterogeneous nuclear ribonucleoprotein M                  | 44.91 | 39.78 | 36 |
| 150 | IPI:IPI00123181.4 | Myh9 Myosin-9                                                                  | 44.23 | 22.35 | 33 |
| 151 | IPI:IPI00228150.1 | Immt Isoform 1 of Mitochondrial inner membrane protein                         | 44.17 | 42.8  | 33 |
| 152 | IPI:IPI00653643.3 | Hnrnpl Putative uncharacterized protein                                        | 43.87 | 44.43 | 39 |
| 153 | IPI:IPI00134845.1 | Cryba1 Crystallin, beta A1                                                     | 43.69 | 75.35 | 83 |
| 154 | IPI:IPI00346965.5 | Ap1b1 AP-1 complex subunit beta-1                                              | 43.59 | 29.59 | 27 |
| 155 | IPI:IPI00469392.2 | Rtn4 Isoform 1 of Reticulon-4                                                  | 43.58 | 38.30 | 35 |
| 156 | IPI:IPI00875218.1 | Anxa6 76 kDa protein                                                           | 43.35 | 42.86 | 24 |
| 157 | IPI:IPI00227849.5 | Cryba2 Beta-crystallin A2                                                      | 43.3  | 76.14 | 44 |
| 158 | IPI:IPI00970385.1 | Impdh1 61 kDa protein                                                          | 43.18 | 48.06 | 30 |
| 159 | IPI:IPI00129618.1 | Syt1 Synaptotagmin-1                                                           | 43.16 | 52.02 | 35 |
| 160 | IPI:IPI00845581.1 | Dpysl4 Isoform 2 of Dihydropyrimidinase-related protein 4                      | 42.78 | 63.07 | 31 |
| 161 | IPI:IPI00223092.5 | Hadha Trifunctional enzyme subunit alpha, mitochondrial                        | 42.71 | 40.1  | 32 |
| 162 | IPI:IPI00222363.5 | Rcvrn Recoverin                                                                | 42.67 | 75.25 | 36 |
| 163 | IPI:IPI00133916.2 | Hnrnph1 Heterogeneous nuclear ribonucleoprotein H                              | 42.47 | 49.89 | 36 |
| 164 | IPI:IPI00308882.4 | Ndufs1 NADH-ubiquinone oxidoreductase 75 kDa subunit, mitochondrial            | 42.17 | 35.76 | 29 |
| 165 | IPI:IPI00230192.5 | Gnao1 Isoform Alpha-1 of Guanine nucleotide-binding protein G(o) subunit alpha | 42.07 | 58.76 | 46 |

|     |                        |                                                                               |       |       |    |
|-----|------------------------|-------------------------------------------------------------------------------|-------|-------|----|
| 166 | IPI:IPI00121534.1<br>1 | Car2 Carbonic anhydrase 2                                                     | 41.65 | 80.38 | 69 |
| 167 | IPI:IPI00553777.2      | Hnrnpa1 Putative uncharacterized protein                                      | 41.6  | 45.31 | 56 |
| 168 | IPI:IPI00930784.1      | Ndufs1 NADH-ubiquinone oxidoreductase 75 kDa subunit, mitochondrial precursor | 41.57 | 41.68 | 24 |
| 169 | IPI:IPI00116279.3      | Cct5 T-complex protein 1 subunit epsilon                                      | 41.46 | 48.06 | 28 |
| 170 | IPI:IPI00116277.3      | Cct4 T-complex protein 1 subunit delta                                        | 41.22 | 44.34 | 30 |
| 171 | IPI:IPI00755791.4      | Slmap Isoform 4 of Sarcolemmal membrane-associated protein                    | 41.14 | 23.33 | 23 |
| 172 | IPI:IPI00111885.1      | Uqcrc1 Cytochrome b-c1 complex subunit 1, mitochondrial                       | 40.98 | 54.37 | 38 |
| 173 | IPI:IPI00117042.3      | Gfap Isoform 1 of Glial fibrillary acidic protein                             | 40.78 | 52.79 | 31 |
| 174 | IPI:IPI00336881.1      | Ddah2 N(G),N(G)-dimethylarginine dimethylaminohydrolase 2                     | 40.58 | 80.35 | 27 |
| 175 | IPI:IPI00465786.3      | Tln1 Talin-1                                                                  | 40.37 | 14.40 | 27 |
| 176 | IPI:IPI00130187.1      | Atp6v0a1 Isoform A1-II of V-type proton ATPase 116 kDa subunit a isoform 1    | 40.16 | 23.12 | 27 |
| 177 | IPI:IPI00131830.1      | Serpina3k Serine protease inhibitor A3K                                       | 40.05 | 47.37 | 29 |
| 178 | IPI:IPI00312128.3      | Trim28 Isoform 1 of Transcription intermediary factor 1-beta                  | 39.94 | 35.01 | 23 |
| 179 | IPI:IPI00921642.1      | Ank2 Isoform 5 of Ankyrin-2                                                   | 39.89 | 10.85 | 27 |
| 180 | IPI:IPI00856365.1      | Dctn1 Dctn1 protein                                                           | 39.84 | 28.16 | 26 |
| 181 | IPI:IPI00119346.1      | Calb2 Calretinin                                                              | 39.75 | 68.27 | 32 |
| 182 | IPI:IPI00228526.3      | Atp6v0a1 ATPase, H+ transporting, lysosomal V0 subunit a isoform 1            | 39.42 | 26.68 | 27 |
| 183 | IPI:IPI00756238.2      | Mpp2 Isoform 2 of MAGUK p55 subfamily member 2                                | 39.37 | 36.91 | 32 |
| 184 | IPI:IPI00230540.1      | Vdac1 Isoform Mt-VDAC1 of Voltage-dependent anion-selective channel protein 1 | 39.23 | 68.55 | 30 |
| 185 | IPI:IPI00469268.5      | Cct8 T-complex protein 1 subunit theta                                        | 39.18 | 43.07 | 26 |
| 186 | IPI:IPI00331541.5      | Pfkm 6-phosphofructokinase, muscle type                                       | 38.96 | 42.05 | 27 |
| 187 | IPI:IPI00409462.2      | Bat1a Spliceosome RNA helicase Bat1                                           | 38.9  | 42.29 | 31 |
| 188 | IPI:IPI00623553.1      | Gm10250;LOC100044492 hypothetical protein                                     | 38.86 | 81.88 | 33 |
| 189 | IPI:IPI00400180.1      | Amph Amphiphysin                                                              | 38.67 | 34.69 | 23 |
| 190 | IPI:IPI00229080.7      | Hsp90ab1 Putative uncharacterized protein                                     | 38.67 | 52.07 | 80 |
| 191 | IPI:IPI00135231.2      | Idh1 Isocitrate dehydrogenase                                                 | 38.65 | 53.79 | 30 |
| 192 | IPI:IPI00321734.7      | Glo1 Lactoylglutathione lyase                                                 | 38.34 | 70.65 | 43 |
| 193 | IPI:IPI00459493.5      | Tcp1 Isoform 1 of T-complex protein 1 subunit alpha                           | 38.3  | 40.47 | 26 |
| 194 | IPI:IPI00224729.1      | Hnrnp1 Putative uncharacterized protein                                       | 38.01 | 43.86 | 37 |
| 195 | IPI:IPI00122270.3      | Crybb3 Beta-crystallin B3                                                     | 37.72 | 74.88 | 35 |
| 196 | IPI:IPI00123613.1      | Pacsin1 Protein kinase C and casein kinase substrate in neurons protein 1     | 37.56 | 59.41 | 25 |
| 197 | IPI:IPI00124692.1      | Taldo1 Transaldolase                                                          | 37.43 | 43.62 | 24 |

|     |                        |                                                                      |       |       |     |
|-----|------------------------|----------------------------------------------------------------------|-------|-------|-----|
| 198 | IPI:IPI00828950.1      | Atp6v0a1 ATPase, H+ transporting, lysosomal V0 subunit a isoform 1   | 37.42 | 21.15 | 25  |
| 199 | IPI:IPI00626662.3      | Aldh1a1 Retinal dehydrogenase 1                                      | 37.39 | 37.72 | 29  |
| 200 | IPI:IPI00315879.1      | Cndp2 Cytosolic non-specific dipeptidase                             | 37.14 | 54.53 | 23  |
| 201 | IPI:IPI00623284.4      | Sf3b1 Splicing factor 3B subunit 1                                   | 37.13 | 23.47 | 21  |
| 202 | IPI:IPI00798482.2<br>0 | Hspa1a Heat shock 70 kDa protein 1A                                  | 36.92 | 55.85 | 57  |
| 203 | IPI:IPI00111222.1      | Aldh3a1 Aldehyde dehydrogenase, dimeric NADP-preferring              | 36.8  | 35.1  | 27  |
| 204 | IPI:IPI00133176.1      | Pdc Phosducin                                                        | 36.7  | 63.93 | 49  |
| 205 | IPI:IPI00400209.1      | Plec Isoform PLEC-1H of Plectin                                      | 36.59 | 6.788 | 21  |
| 206 | IPI:IPI00929758.1      | Tln1 talin-1                                                         | 36.44 | 15.31 | 29  |
| 207 | IPI:IPI00123342.4      | Hyou1 Hypoxia up-regulated protein 1                                 | 36.35 | 30.43 | 19  |
| 208 | IPI:IPI00124287.1      | Pabpc1 Polyadenylate-binding protein 1                               | 36.24 | 33.18 | 21  |
| 209 | IPI:IPI00928552.1      | Impdh1 Inosine-5'-monophosphate dehydrogenase                        | 36.21 | 46.63 | 25  |
| 210 | IPI:IPI00314736.3      | Anp32a Acidic leucine-rich nuclear phosphoprotein 32 family member A | 36.16 | 50.20 | 34  |
| 211 | IPI:IPI00403336.4      | Opa1 Isoform 2 of Dynamin-like 120 kDa protein, mitochondrial        | 36.11 | 22.27 | 18  |
| 212 | IPI:IPI00881945.1      | Tpm3 29 kDa protein                                                  | 36.04 | 54.44 | 19  |
| 213 | IPI:IPI00118986.1      | Atp5o;LOC100047429 ATP synthase subunit O, mitochondrial             | 35.96 | 69.95 | 38  |
| 214 | IPI:IPI00116281.3      | Cct6a T-complex protein 1 subunit zeta                               | 35.96 | 44.07 | 23  |
| 215 | IPI:IPI00664643.2      | Flna Filamin, alpha                                                  | 35.85 | 13.33 | 20  |
| 216 | IPI:IPI00411074.2      | Pcbp3 Isoform 1 of Poly(rC)-binding protein 3                        | 35.75 | 62.8  | 32  |
| 217 | IPI:IPI00228548.6      | Eno3 Beta-enolase                                                    | 35.72 | 63.13 | 181 |
| 218 | IPI:IPI00271951.5      | Pdia4 protein disulfide-isomerase A4                                 | 35.64 | 39.78 | 26  |
| 219 | IPI:IPI00890117.1      | Cfl1 Cofilin-1                                                       | 35.6  | 74.1  | 26  |
| 220 | IPI:IPI00556723.1      | Dnm1l Isoform 1 of Dynamin-1-like protein                            | 35.52 | 39.08 | 25  |
| 221 | IPI:IPI00131304.3      | Rpe65 Retinoid isomerohydrolase                                      | 35.44 | 28.33 | 20  |
| 222 | IPI:IPI00554845.2      | Immt Isoform 5 of Mitochondrial inner membrane protein               | 35.27 | 35.52 | 23  |
| 223 | IPI:IPI00317309.5      | Anxa5 Annexin A5                                                     | 35.23 | 58.31 | 26  |
| 224 | IPI:IPI00762452.2      | Idh1 isocitrate dehydrogenase [NADP] cytoplasmic                     | 35.09 | 52.90 | 26  |
| 225 | IPI:IPI00759952.1      | Ktn1 Isoform 3 of Kinectin                                           | 34.99 | 22.31 | 18  |
| 226 | IPI:IPI00555125.1      | Kif5b kinesin-1 heavy chain                                          | 34.9  | 23.78 | 21  |
| 227 | IPI:IPI00118384.1      | Ywhae 14-3-3 protein epsilon                                         | 34.79 | 68.24 | 55  |
| 228 | IPI:IPI00881918.1      | Usp5 Ubiquitin carboxyl-terminal hydrolase                           | 34.69 | 34.01 | 21  |
| 229 | IPI:IPI00227235.4      | Ank2 Isoform 2 of Ankyrin-2                                          | 34.49 | 10.72 | 27  |
| 230 | IPI:IPI00403996.2      | Ilf3 Isoform 2 of Interleukin enhancer-binding factor 3              | 34.44 | 29.05 | 20  |
| 231 | IPI:IPI00969867.1      | Serpina1b Serpina1a protein                                          | 34.24 | 50.85 | 29  |

|     |                   |                                                                       |       |       |    |
|-----|-------------------|-----------------------------------------------------------------------|-------|-------|----|
| 232 | IPI:IPI00223319.3 | Stx3 syntaxin-3 isoform B                                             | 34.08 | 54.36 | 31 |
| 233 | IPI:IPI00114352.1 | Bin1 Isoform 1 of Myc box-dependent-interacting protein 1             | 34.02 | 39.29 | 24 |
| 234 | IPI:IPI00776384.1 | Ilf3 Nuclear factor 90                                                | 33.93 | 32.15 | 21 |
| 235 | IPI:IPI00229299.1 | Epb4.1l3 Isoform 6 of Band 4.1-like protein 3                         | 33.58 | 32.54 | 25 |
| 236 | IPI:IPI00850833.1 | Cadm2 Isoform 3 of Cell adhesion molecule 2                           | 33.14 | 51.39 | 25 |
| 237 | IPI:IPI00464317.3 | Gls glutaminase isoform 1                                             | 33.14 | 37.39 | 22 |
| 238 | IPI:IPI00753468.2 | Ap2a2 AP-2 complex subunit alpha-2                                    | 33.12 | 28.89 | 24 |
| 239 | IPI:IPI00129517.1 | Prdx5 Isoform Mitochondrial of Peroxiredoxin-5, mitochondrial         | 33.06 | 63.33 | 23 |
| 240 | IPI:IPI00124444.1 | Pfkp Isoform 1 of 6-phosphofructokinase type C                        | 32.95 | 31.51 | 25 |
| 241 | IPI:IPI00230507.5 | Atp5h ATP synthase subunit d, mitochondrial                           | 32.85 | 85.09 | 26 |
| 242 | IPI:IPI00112963.1 | Ctnna1 Catenin alpha-1                                                | 32.73 | 32.01 | 21 |
| 243 | IPI:IPI00129430.1 | Sfpq Splicing factor, proline- and glutamine-rich                     | 32.67 | 27.18 | 27 |
| 244 | IPI:IPI00314748.7 | Wdr1 WD repeat-containing protein 1                                   | 32.66 | 31.52 | 21 |
| 245 | IPI:IPI00759940.2 | Fh1 fumarate hydratase, mitochondrial precursor                       | 32.62 | 46.55 | 26 |
| 246 | IPI:IPI00110684.1 | Ppa1 Inorganic pyrophosphatase                                        | 32.59 | 57.44 | 20 |
| 247 | IPI:IPI00378063.1 | Ap2b1 Isoform 2 of AP-2 complex subunit beta                          | 32.53 | 25.55 | 22 |
| 248 | IPI:IPI00312527.4 | Crmp1 Crmp1 protein                                                   | 32.45 | 51.9  | 44 |
| 249 | IPI:IPI00110721.5 | Glod4 Isoform 1 of Glyoxalase domain-containing protein 4             | 32.41 | 57.38 | 19 |
| 250 | IPI:IPI00336874.1 | Hnrnpd Isoform 4 of Heterogeneous nuclear ribonucleoprotein D0        | 32.34 | 40.42 | 31 |
| 251 | IPI:IPI00420329.1 | Snrnp200 Small nuclear ribonucleoprotein 200                          | 32.31 | 11.33 | 19 |
| 252 | IPI:IPI00670114.1 | Cadps Isoform 4 of Calcium-dependent secretion activator 1            | 32.25 | 17.17 | 21 |
| 253 | IPI:IPI00761696.2 | Calm1;Calm2;Calm3 Calmodulin                                          | 32.24 | 93.96 | 53 |
| 254 | IPI:IPI00473748.5 | Mtap4 Isoform 3 of Microtubule-associated protein 4                   | 32.15 | 26.03 | 21 |
| 255 | IPI:IPI00226073.2 | Hnrnpf Isoform 1 of Heterogeneous nuclear ribonucleoprotein F         | 31.84 | 54.22 | 28 |
| 256 | IPI:IPI00881540.3 | Synj1 Synaptojanin-1                                                  | 31.65 | 18.87 | 25 |
| 257 | IPI:IPI00132653.1 | Oxct1 Succinyl-CoA:3-ketoacid-coenzyme A transferase 1, mitochondrial | 31.65 | 41.35 | 19 |
| 258 | IPI:IPI00113214.1 | Usp5 Ubiquitin carboxyl-terminal hydrolase 5                          | 31.59 | 31.93 | 18 |
| 259 | IPI:IPI00918800.1 | Rdh5 retinol dehydrogenase 5                                          | 31.57 | 69.18 | 20 |
| 260 | IPI:IPI00134344.6 | Spnb3 Putative uncharacterized protein                                | 31.57 | 12.69 | 25 |
| 261 | IPI:IPI00339916.9 | Eprs Bifunctional aminoacyl-tRNA synthetase                           | 31.55 | 15.41 | 20 |
| 262 | IPI:IPI00311461.1 | Atp6v1h V-type proton ATPase subunit H                                | 31.5  | 38.3  | 19 |
| 263 | IPI:IPI00128296.1 | Ckmt1 Creatine kinase U-type, mitochondrial                           | 31.47 | 55.5  | 33 |
| 264 | IPI:IPI00808550.1 | Fam169a Protein FAM169A                                               | 31.31 | 32.63 | 26 |
| 265 | IPI:IPI00261627.1 | Sucla2 Succinyl-CoA ligase [ADP-forming] subunit beta, mitochondrial  | 31.3  | 34.99 | 18 |



|     |                   |                                                                                    |       |       |    |
|-----|-------------------|------------------------------------------------------------------------------------|-------|-------|----|
| 266 | IPI:IPI00121550.3 | Atp1b1 Sodium/potassium-transporting ATPase subunit beta-1                         | 31.28 | 41.78 | 21 |
| 267 | IPI:IPI00111412.3 | Rpl4 60S ribosomal protein L4                                                      | 31.06 | 38.9  | 19 |
| 268 | IPI:IPI00225337.5 | Rbp1 Retinol-binding protein 1                                                     | 31.06 | 72.59 | 24 |
| 269 | IPI:IPI00331552.4 | Pabpc1 polyadenylate-binding protein 1                                             | 30.92 | 31.6  | 18 |
| 270 | IPI:IPI00229510.5 | Ldhb L-lactate dehydrogenase B chain                                               | 30.78 | 54.79 | 29 |
| 271 | IPI:IPI00930878.1 | Psmc3 26S protease regulatory subunit 6A                                           | 30.72 | 45.7  | 20 |
| 272 | IPI:IPI00126128.1 | Grk1;LOC100045507 Rhodopsin kinase                                                 | 30.62 | 32.62 | 19 |
| 273 | IPI:IPI00113141.1 | Cs Citrate synthase, mitochondrial                                                 | 30.61 | 44.4  | 39 |
| 274 | IPI:IPI00226891.1 | Myef2 Isoform 1 of Myelin expression factor 2                                      | 30.51 | 25.38 | 19 |
| 275 | IPI:IPI00116112.3 | Dctn2 Dynactin subunit 2                                                           | 30.48 | 59.45 | 21 |
| 276 | IPI:IPI00122011.2 | Sf3b3 Isoform 1 of Splicing factor 3B subunit 3                                    | 30.41 | 19.31 | 23 |
| 277 | IPI:IPI00230440.6 | Ahcy Adenosylhomocysteinase                                                        | 30.3  | 43.06 | 21 |
| 278 | IPI:IPI00459725.2 | Idh3a Isoform 1 of Isocitrate dehydrogenase [NAD] subunit alpha, mitochondrial     | 30.3  | 51.09 | 25 |
| 279 | IPI:IPI00858128.1 | Camk2d calcium/calmodulin-dependent protein kinase type II subunit delta isoform 1 | 30.28 | 33.4  | 22 |
| 280 | IPI:IPI00620362.4 | Hnrnpl Heterogeneous nuclear ribonucleoprotein L                                   | 30.25 | 35.15 | 36 |
| 281 | IPI:IPI00227782.5 | Cryba4 Beta-crystallin A4                                                          | 30.24 | 70.92 | 41 |
| 282 | IPI:IPI00123704.1 | Atp1b2 Sodium/potassium-transporting ATPase subunit beta-2                         | 30.22 | 32.07 | 20 |
| 283 | IPI:IPI00127172.3 | Ddx1 ATP-dependent RNA helicase DDX1                                               | 30.22 | 25.81 | 18 |
| 284 | IPI:IPI00125635.1 | Snap25 Isoform SNAP-25b of Synaptosomal-associated protein 25                      | 30.2  | 60.19 | 29 |
| 285 | IPI:IPI00462873.3 | Epb4.1 Isoform 2 of Protein 4.1                                                    | 30.12 | 26.12 | 19 |
| 286 | IPI:IPI00136134.1 | Ndr2 Isoform 1 of Protein NDRG2                                                    | 29.88 | 59.3  | 29 |
| 287 | IPI:IPI00113530.3 | Impg1 Isoform 2 of Interphotoreceptor matrix proteoglycan 1                        | 29.87 | 28.17 | 19 |
| 288 | IPI:IPI00461967.2 | Cadm1 Isoform 3 of Cell adhesion molecule 1                                        | 29.83 | 42.76 | 37 |
| 289 | IPI:IPI00927975.1 | Pfcp Putative uncharacterized protein                                              | 29.77 | 28.06 | 23 |
| 290 | IPI:IPI00134300.1 | Ssb Lupus La protein homolog                                                       | 29.77 | 35.66 | 17 |
| 291 | IPI:IPI00875244.1 | Cadm1 46 kDa protein                                                               | 29.74 | 43.93 | 32 |
| 292 | IPI:IPI00874456.1 | Dld Dihydrolipoyl dehydrogenase, mitochondrial                                     | 29.73 | 43.22 | 19 |
| 293 | IPI:IPI00855011.1 | Opa1 similar to optic atrophy 1                                                    | 29.55 | 26.91 | 18 |
| 294 | IPI:IPI00130016.1 | Anp32e Isoform 1 of Acidic leucine-rich nuclear phosphoprotein 32 family member E  | 29.5  | 55.77 | 34 |
| 295 | IPI:IPI00131459.1 | Nme1;LOC100046344 Nucleoside diphosphate kinase A                                  | 29.46 | 83.55 | 17 |
| 296 | IPI:IPI00117831.2 | Cp Ceruloplasmin                                                                   | 29.42 | 19.98 | 19 |
| 297 | IPI:IPI00331174.5 | Cct7 T-complex protein 1 subunit eta                                               | 29.38 | 34.01 | 20 |
| 298 | IPI:IPI00874653.1 | Cadm2 43 kDa protein                                                               | 29.31 | 49.87 | 28 |
| 299 | IPI:IPI00830427.1 | Tpm1 tropomyosin alpha-1 chain isoform 9                                           | 29.24 | 43.42 | 18 |
| 300 | IPI:IPI00464296.5 | Epb4.1i3 Isoform 8 of Band 4.1-like protein 3                                      | 29.18 | 23.46 | 23 |

|     |                   |                                                                                                               |       |       |    |
|-----|-------------------|---------------------------------------------------------------------------------------------------------------|-------|-------|----|
| 301 | IPI:IPI00119115.2 | Atp6v1e1 V-type proton ATPase subunit E 1                                                                     | 29.07 | 63.27 | 33 |
| 302 | IPI:IPI00116850.3 | D10Wsu52e UPF0027 protein C22orf28 homolog                                                                    | 29.07 | 36.83 | 21 |
| 303 | IPI:IPI00890008.1 | Gucy2e guanylyl cyclase GC-E precursor                                                                        | 29    | 23.01 | 22 |
| 304 | IPI:IPI00153660.4 | Dlat Dihydrolipoyllysine-residue acetyltransferase component of pyruvate dehydrogenase complex, mitochondrial | 28.92 | 34.27 | 19 |
| 305 | IPI:IPI00649135.2 | Gstm1 Glutathione S-transferase, mu 1                                                                         | 28.88 | 48.36 | 20 |
| 306 | IPI:IPI00222208.2 | Hnrnpul2 Heterogeneous nuclear ribonucleoprotein U-like protein 2                                             | 28.85 | 29.53 | 21 |
| 307 | IPI:IPI00653158.1 | Acaa2 Putative uncharacterized protein                                                                        | 28.83 | 61.46 | 19 |
| 308 | IPI:IPI00969326.1 | Prdx5 Prdx5 protein                                                                                           | 28.68 | 57.62 | 26 |
| 309 | IPI:IPI00154084.2 | Myef2 Isoform 2 of Myelin expression factor 2                                                                 | 28.43 | 26.13 | 18 |
| 310 | IPI:IPI00667117.2 | Dbi Acyl-CoA-binding protein                                                                                  | 28.42 | 79.31 | 30 |
| 311 | IPI:IPI00648567.1 | Sh3gl2 SH3-domain GRB2-like 2                                                                                 | 28.38 | 46.64 | 22 |
| 312 | IPI:IPI00130729.3 | Gucy2e Guanylyl cyclase GC-E                                                                                  | 28.37 | 17.33 | 20 |
| 313 | IPI:IPI00453777.2 | Atp5d ATP synthase subunit delta, mitochondrial                                                               | 28.36 | 67.26 | 22 |
| 314 | IPI:IPI00227432.7 | Dnm3 Isoform 1 of Dynamin-3                                                                                   | 28.33 | 30.01 | 32 |
| 315 | IPI:IPI00129178.1 | Oat Ornithine aminotransferase, mitochondrial                                                                 | 28.27 | 49.43 | 21 |
| 316 | IPI:IPI00122094.2 | Dlg4 Isoform 2 of Disks large homolog 4                                                                       | 28.14 | 31.55 | 17 |
| 317 | IPI:IPI00354210.7 | Cryge Gamma-crystallin E                                                                                      | 28.12 | 74.71 | 70 |
| 318 | IPI:IPI00123292.5 | Fubp1 Putative uncharacterized protein                                                                        | 27.98 | 26.29 | 21 |
| 319 | IPI:IPI00114209.1 | Glud1 Glutamate dehydrogenase 1, mitochondrial                                                                | 27.86 | 32.44 | 17 |
| 320 | IPI:IPI00120719.4 | Cox5a Cytochrome c oxidase subunit 5A, mitochondrial                                                          | 27.69 | 59.59 | 20 |
| 321 | IPI:IPI00128028.1 | Scgn Secretagoin                                                                                              | 27.67 | 54.35 | 25 |
| 322 | IPI:IPI00121788.1 | Prdx1 Peroxiredoxin-1                                                                                         | 27.65 | 64.32 | 23 |
| 323 | IPI:IPI00880644.2 | Tpr nuclear pore complex-associated protein Tpr                                                               | 27.65 | 9.461 | 15 |
| 324 | IPI:IPI00117288.3 | Hnrnpab Heterogeneous nuclear ribonucleoprotein A/B                                                           | 27.63 | 34.39 | 25 |
| 325 | IPI:IPI00849047.1 | - similar to heterogeneous nuclear ribonucleoprotein U-like 2                                                 | 27.62 | 29.53 | 21 |
| 326 | IPI:IPI00121209.1 | Apoa1 Apolipoprotein A-I                                                                                      | 27.62 | 59.47 | 18 |
| 327 | IPI:IPI00114342.1 | Hk2 Hexokinase-2                                                                                              | 27.6  | 24.65 | 25 |
| 328 | IPI:IPI00930882.1 | Slc3a2 4F2 cell-surface antigen heavy chain isoform a                                                         | 27.57 | 30.44 | 18 |
| 329 | IPI:IPI00469317.4 | Sars Seryl-tRNA synthetase, cytoplasmic                                                                       | 27.56 | 29.88 | 15 |
| 330 | IPI:IPI00223047.2 | Ckap4 Cytoskeleton-associated protein 4                                                                       | 27.55 | 28.87 | 18 |
| 331 | IPI:IPI00225307.1 | Sars Seryl-aminoacyl-tRNA synthetase, isoform CRA_b                                                           | 27.53 | 39.74 | 22 |
| 332 | IPI:IPI00134599.1 | Rps3 40S ribosomal protein S3                                                                                 | 27.51 | 39.51 | 8  |
| 333 | IPI:IPI00858144.1 | Camk2d 55 kDa protein                                                                                         | 27.47 | 33.61 | 18 |
| 334 | IPI:IPI00321308.4 | Aars Alanyl-tRNA synthetase, cytoplasmic                                                                      | 27.38 | 19.63 | 16 |
| 335 | IPI:IPI00284806.8 | Hprt Hypoxanthine-guanine                                                                                     | 27.33 | 67.43 | 19 |

|     |                   |                                                                                      |       |       |    |
|-----|-------------------|--------------------------------------------------------------------------------------|-------|-------|----|
|     |                   | phosphoribosyltransferase                                                            |       |       |    |
| 336 | IPI:IPI00337893.2 | Pdha1 Pyruvate dehydrogenase E1 component subunit alpha, somatic form, mitochondrial | 27.3  | 36.15 | 19 |
| 337 | IPI:IPI00466032.3 | Elav1 ELAV-like protein 1                                                            | 27.22 | 52.15 | 20 |
| 338 | IPI:IPI00555023.2 | Gstp1 Glutathione S-transferase P 1                                                  | 27.2  | 58.57 | 33 |
| 339 | IPI:IPI00894579.1 | Pgd 6-phosphogluconate dehydrogenase, decarboxylating                                | 27.11 | 31.26 | 18 |
| 340 | IPI:IPI00396797.2 | Ddx17 Isoform 1 of Probable ATP-dependent RNA helicase DDX17                         | 27.01 | 32.46 | 26 |
| 341 | IPI:IPI00420807.3 | Srsf1;LOC100048559 Isoform 1 of Serine/arginine-rich splicing factor 1               | 26.97 | 40.73 | 15 |
| 342 | IPI:IPI00649033.5 | Gfap Isoform 2 of Glial fibrillary acidic protein                                    | 26.95 | 34.58 | 20 |
| 343 | IPI:IPI00929813.1 | Nap1l1 nucleosome assembly protein 1-like 1 isoform 1                                | 26.94 | 44.02 | 21 |
| 344 | IPI:IPI00128071.7 | Uso1 Isoform 1 of General vesicular transport factor p115                            | 26.92 | 10.53 | 9  |
| 345 | IPI:IPI00136000.1 | Add1 Isoform 1 of Alpha-adducin                                                      | 26.9  | 21.36 | 14 |
| 346 | IPI:IPI00895414.1 | Park7 Parkinson disease (Autosomal recessive, early onset) 7                         | 26.8  | 67.55 | 26 |
| 347 | IPI:IPI00128023.3 | Ndufs2 NADH dehydrogenase [ubiquinone] iron-sulfur protein 2, mitochondrial          | 26.8  | 28.51 | 9  |
| 348 | IPI:IPI00154054.1 | Acat1 Acetyl-CoA acetyltransferase, mitochondrial                                    | 26.75 | 45.05 | 23 |
| 349 | IPI:IPI00322033.7 | Tom1l2 Isoform 1 of TOM1-like protein 2                                              | 26.7  | 41.22 | 14 |
| 350 | IPI:IPI00227144.1 | Rdh12 Retinol dehydrogenase 12                                                       | 26.63 | 47.47 | 17 |
| 351 | IPI:IPI00126635.1 | Idh3b isocitrate dehydrogenase 3, beta subunit                                       | 26.62 | 42.45 | 17 |
| 352 | IPI:IPI00131614.1 | Sncb Beta-synuclein                                                                  | 26.61 | 96.99 | 24 |
| 353 | IPI:IPI00895965.1 | Mtap2 Microtubule-associated protein                                                 | 26.58 | 14.55 | 18 |
| 354 | IPI:IPI00775838.1 | Dhx15 putative pre-mRNA-splicing factor ATP-dependent RNA helicase DHX15 isoform 1   | 26.43 | 24.61 | 16 |
| 355 | IPI:IPI00223443.1 | Hnrnpc Isoform C1 of Heterogeneous nuclear ribonucleoproteins C1/C2                  | 26.43 | 42.67 | 21 |
| 356 | IPI:IPI00759881.1 | Acad9 acyl-CoA dehydrogenase family member 9, mitochondrial precursor                | 26.28 | 28.16 | 14 |
| 357 | IPI:IPI00405227.3 | Vcl Vinculin                                                                         | 26.25 | 20.26 | 15 |
| 358 | IPI:IPI00122547.1 | Vdac2 Voltage-dependent anion-selective channel protein 2                            | 26.15 | 52.88 | 18 |
| 359 | IPI:IPI00624192.3 | Dpysl5 Dihydropyrimidinase-related protein 5                                         | 26.11 | 35.64 | 14 |
| 360 | IPI:IPI00313962.3 | Uchl1 Ubiquitin carboxyl-terminal hydrolase isozyme L1                               | 26.1  | 69.06 | 23 |
| 361 | IPI:IPI00943457.1 | Pcx pyruvate carboxylase isoform 1                                                   | 25.96 | 13.74 | 9  |
| 362 | IPI:IPI00318550.5 | Ilf2 Interleukin enhancer-binding factor 2                                           | 25.94 | 47.95 | 14 |
| 363 | IPI:IPI00128904.1 | Pcbp1 Poly(rC)-binding protein 1                                                     | 25.92 | 61.52 | 29 |
| 364 | IPI:IPI00411088.5 | Cadm1 Isoform 2 of Cell adhesion molecule 1                                          | 25.91 | 42.02 | 34 |
| 365 | IPI:IPI00117910.3 | Prdx2 Peroxiredoxin-2                                                                | 25.89 | 63.64 | 30 |

|     |                   |                                                                                                                                    |       |       |    |
|-----|-------------------|------------------------------------------------------------------------------------------------------------------------------------|-------|-------|----|
| 366 | IPI:IPI00750256.2 | Ak1 Isoform 2 of Adenylate kinase isoenzyme 1                                                                                      | 25.88 | 50.48 | 20 |
| 367 | IPI:IPI00130173.1 | Uba2 SUMO-activating enzyme subunit 2                                                                                              | 25.72 | 27.9  | 14 |
| 368 | IPI:IPI00187557.2 | Obp1a Putative uncharacterized protein                                                                                             | 25.66 | 58.9  | 21 |
| 369 | IPI:IPI00408892.2 | Rab7 Ras-related protein Rab-7a                                                                                                    | 25.58 | 62.32 | 18 |
| 370 | IPI:IPI00169788.1 | Prkar2a cAMP-dependent protein kinase type II-alpha regulatory chain                                                               | 25.53 | 42.79 | 17 |
| 371 | IPI:IPI00929789.1 | Guk1 guanylate kinase isoform 2                                                                                                    | 25.42 | 71.01 | 19 |
| 372 | IPI:IPI00850430.1 | LOC100046151 similar to Solute carrier family 25 (mitochondrial carrier, phosphate carrier), member 3                              | 25.41 | 30.25 | 17 |
| 373 | IPI:IPI00125899.1 | Ctnnb1 Catenin beta-1                                                                                                              | 25.4  | 17.8  | 8  |
| 374 | IPI:IPI00349401.5 | Sf3b2 splicing factor 3b, subunit 2                                                                                                | 25.37 | 21.98 | 15 |
| 375 | IPI:IPI00775854.1 | Dlg2 Uncharacterized protein                                                                                                       | 25.29 | 21.19 | 15 |
| 376 | IPI:IPI00626797.1 | Dlg4 Isoform 3 of Disks large homolog 4                                                                                            | 25.25 | 33.56 | 17 |
| 377 | IPI:IPI00400432.2 | Eif4a2 Isoform 1 of Eukaryotic initiation factor 4A-II                                                                             | 25.21 | 45.21 | 19 |
| 378 | IPI:IPI00222515.5 | Psmd11 26S proteasome non-ATPase regulatory subunit 11                                                                             | 25.18 | 34.12 | 14 |
| 379 | IPI:IPI00122353.1 | PrkcsH Isoform 2 of Glucosidase 2 subunit beta                                                                                     | 25.17 | 22.35 | 12 |
| 380 | IPI:IPI00458612.5 | Aak1 Isoform 1 of AP2-associated protein kinase 1                                                                                  | 25.03 | 15.64 | 9  |
| 381 | IPI:IPI00874570.1 | Cp Putative uncharacterized protein                                                                                                | 24.82 | 17.97 | 15 |
| 382 | IPI:IPI00268144.1 | Si Silver, isoform CRA_a                                                                                                           | 24.8  | 22.68 | 20 |
| 383 | IPI:IPI00279443.1 | Hspa12a Heat shock 70 kDa protein 12A                                                                                              | 24.79 | 15.11 | 9  |
| 384 | IPI:IPI00124771.1 | Slc25a3 Phosphate carrier protein, mitochondrial                                                                                   | 24.79 | 34.73 | 19 |
| 385 | IPI:IPI00850217.2 | LOC100046119 similar to ubiquitin-conjugating enzyme E2 UbcH-ben                                                                   | 24.78 | 58.62 | 18 |
| 386 | IPI:IPI00845772.1 | Cyc1 Isoform 2 of Cytochrome c1, heme protein, mitochondrial                                                                       | 24.75 | 51.13 | 16 |
| 387 | IPI:IPI00653794.2 | Rap1gds1 RAP1, GTP-GDP dissociation stimulator 1 isoform a                                                                         | 24.71 | 29    | 14 |
| 388 | IPI:IPI00316740.4 | Ddb1 DNA damage-binding protein 1                                                                                                  | 24.68 | 13.95 | 15 |
| 389 | IPI:IPI00134809.2 | Dist Isoform 1 of Dihydrolipoyllysine-residue succinyltransferase component of 2-oxoglutarate dehydrogenase complex, mitochondrial | 24.67 | 40.31 | 19 |
| 390 | IPI:IPI00553593.1 | Tnr Isoform 2 of Tenascin-R                                                                                                        | 24.67 | 17.74 | 16 |
| 391 | IPI:IPI00331092.7 | Rps4x 40S ribosomal protein S4, X isoform                                                                                          | 24.66 | 30.42 | 8  |
| 392 | IPI:IPI00129319.3 | Ppp1r7 Protein phosphatase 1 regulatory subunit 7                                                                                  | 24.65 | 36.29 | 9  |
| 393 | IPI:IPI00788505.1 | Impg1 Isoform 1 of Interphotoreceptor matrix proteoglycan 1                                                                        | 24.59 | 18.17 | 15 |
| 394 | IPI:IPI00133440.1 | Phb Prohibitin                                                                                                                     | 24.56 | 55.15 | 15 |
| 395 | IPI:IPI00480307.1 | Cops2 Isoform 2 of COP9 signalosome complex subunit 2                                                                              | 24.38 | 20.22 | 9  |
| 396 | IPI:IPI00153421.1 | Dync1li1 Cytoplasmic dynein 1 light intermediate chain 1                                                                           | 24.37 | 23.52 | 9  |

|     |                   |                                                                                              |       |       |    |
|-----|-------------------|----------------------------------------------------------------------------------------------|-------|-------|----|
| 397 | IPI:IPI00760078.1 | Ktn1 Isoform 9 of Kinectin                                                                   | 24.36 | 16.61 | 14 |
| 398 | IPI:IPI00314191.6 | Cbr1 Carbonyl reductase [NADPH] 1                                                            | 24.32 | 54.87 | 16 |
| 399 | IPI:IPI00221613.5 | Arf1 ADP-ribosylation factor 1                                                               | 24.3  | 69.06 | 20 |
| 400 | IPI:IPI00622811.2 | Ap2m1 Putative uncharacterized protein                                                       | 24.3  | 30.72 | 14 |
| 401 | IPI:IPI00957027.1 | Rpl3 Putative uncharacterized protein                                                        | 24.21 | 31.51 | 18 |
| 402 | IPI:IPI00112719.1 | Alad Delta-aminolevulinic acid dehydratase                                                   | 24.2  | 45.76 | 19 |
| 403 | IPI:IPI00406118.1 | Syncrip Isoform 2 of Heterogeneous nuclear ribonucleoprotein Q                               | 24.13 | 42.53 | 20 |
| 404 | IPI:IPI00944067.1 | Ndufa9 NADH dehydrogenase [ubiquinone] 1 alpha subcomplex subunit 9, mitochondrial precursor | 24.03 | 38.99 | 12 |
| 405 | IPI:IPI00408269.4 | Snap91 Isoform 3 of Clathrin coat assembly protein AP180                                     | 24    | 24.42 | 22 |
| 406 | IPI:IPI00110827.1 | Acta1 Actin, alpha skeletal muscle                                                           | 23.94 | 73.74 | 95 |
| 407 | IPI:IPI00132042.1 | Pdhb Pyruvate dehydrogenase E1 component subunit beta, mitochondrial                         | 23.89 | 33.7  | 19 |
| 408 | IPI:IPI00277066.4 | Hnrnpab heterogeneous nuclear ribonucleoprotein A/B isoform 1                                | 23.85 | 26.81 | 22 |
| 409 | IPI:IPI00342603.7 | Ogdhl oxoglutarate dehydrogenase-like                                                        | 23.84 | 22.55 | 21 |
| 410 | IPI:IPI00875110.1 | Idh2 52 kDa protein                                                                          | 23.84 | 31.34 | 15 |
| 411 | IPI:IPI00313817.1 | Hdgf Hepatoma-derived growth factor                                                          | 23.83 | 50.21 | 15 |
| 412 | IPI:IPI00230760.5 | Mb Myoglobin                                                                                 | 23.8  | 65.58 | 18 |
| 413 | IPI:IPI00315100.1 | Rhoa Transforming protein RhoA                                                               | 23.73 | 58.03 | 19 |
| 414 | IPI:IPI00229834.3 | Copa Coatomer subunit alpha                                                                  | 23.55 | 17.73 | 16 |
| 415 | IPI:IPI00649885.3 | Acadvl Acyl-Coenzyme A dehydrogenase, very long chain                                        | 23.49 | 30.44 | 14 |
| 416 | IPI:IPI00127415.1 | Npm1 Nucleophosmin                                                                           | 23.49 | 43.84 | 21 |
| 417 | IPI:IPI00881197.1 | Me1 NADP-dependent malic enzyme                                                              | 23.46 | 29.37 | 17 |
| 418 | IPI:IPI00624840.2 | - 12 kDa protein                                                                             | 23.42 | 62.86 | 14 |
| 419 | IPI:IPI00316491.4 | Hbb-b2 Hemoglobin subunit beta-2                                                             | 23.4  | 95.24 | 90 |
| 420 | IPI:IPI00228385.5 | G6pdx Glucose-6-phosphate 1-dehydrogenase X                                                  | 23.35 | 27.38 | 15 |
| 421 | IPI:IPI00124223.3 | Psme1 Proteasome activator complex subunit 1                                                 | 23.21 | 48.59 | 15 |
| 422 | IPI:IPI00894724.1 | Mtap2 Putative uncharacterized protein                                                       | 23.16 | 13.57 | 17 |
| 423 | IPI:IPI00649753.2 | Epb4.1 protein 4.1 isoform 3                                                                 | 23.12 | 27.88 | 19 |
| 424 | IPI:IPI00421218.5 | Tln2 Talin-2                                                                                 | 23.12 | 11.94 | 20 |
| 425 | IPI:IPI00130186.4 | Atp6v1c1 V-type proton ATPase subunit C 1                                                    | 23.12 | 31.68 | 15 |
| 426 | IPI:IPI00222496.3 | Pdia6 Putative uncharacterized protein                                                       | 23.1  | 37.08 | 15 |
| 427 | IPI:IPI00230044.5 | Tpm3 Isoform 2 of Tropomyosin alpha-3 chain                                                  | 23.1  | 44.35 | 15 |
| 428 | IPI:IPI00118787.1 | Atp6v1d V-type proton ATPase subunit D                                                       | 23.01 | 39.68 | 9  |
| 429 | IPI:IPI00123604.4 | Rpsa;LOC100045332 40S ribosomal protein SA                                                   | 22.99 | 39.66 | 9  |
| 430 | IPI:IPI00760003.1 | Ktn1 Isoform 5 of Kinectin                                                                   | 22.93 | 13.33 | 12 |
| 431 | IPI:IPI00453818.3 | Pdcd6ip programmed cell death 6-interacting protein isoform 3                                | 22.92 | 22.09 | 15 |

|     |                   |                                                                               |       |       |    |
|-----|-------------------|-------------------------------------------------------------------------------|-------|-------|----|
| 432 | IPI:IPI00130769.1 | Prph2 Peripherin-2                                                            | 22.91 | 27.75 | 18 |
| 433 | IPI:IPI00120030.1 | Crym Mu-crystallin homolog                                                    | 22.9  | 50.8  | 19 |
| 434 | IPI:IPI00341282.2 | Atp5f1 ATP synthase subunit b, mitochondrial                                  | 22.85 | 39.45 | 15 |
| 435 | IPI:IPI00120076.2 | Ckmt2 Creatine kinase S-type, mitochondrial                                   | 22.83 | 50.84 | 28 |
| 436 | IPI:IPI00113149.1 | Stx1b Syntaxin-1B                                                             | 22.82 | 42.01 | 18 |
| 437 | IPI:IPI00467841.6 | Calm1;Calm2;Calm3 Putative uncharacterized protein                            | 22.79 | 52.79 | 60 |
| 438 | IPI:IPI00857226.1 | Acs1 Uncharacterized protein                                                  | 22.78 | 24.75 | 15 |
| 439 | IPI:IPI00221614.3 | Arf3 ADP-ribosylation factor 3                                                | 22.65 | 67.4  | 18 |
| 440 | IPI:IPI00134704.1 | Cryz Quinone oxidoreductase                                                   | 22.57 | 40.48 | 9  |
| 441 | IPI:IPI00318614.9 | Idh2 Isocitrate dehydrogenase [NADP], mitochondrial                           | 22.56 | 37.83 | 16 |
| 442 | IPI:IPI00136002.1 | Ptbp2 Isoform 2 of Polypyrimidine tract-binding protein 2                     | 22.55 | 24.81 | 9  |
| 443 | IPI:IPI00323881.1 | Kpnb1 Importin subunit beta-1                                                 | 22.53 | 18.38 | 13 |
| 444 | IPI:IPI00408495.1 | Bsg Isoform 1 of Basigin                                                      | 22.44 | 38.82 | 18 |
| 445 | IPI:IPI00230139.5 | Fkbp4 Peptidyl-prolyl cis-trans isomerase FKBP4                               | 22.39 | 29.91 | 16 |
| 446 | IPI:IPI00121758.1 | Tardbp TAR DNA-binding protein 43                                             | 22.36 | 26.09 | 9  |
| 447 | IPI:IPI00108189.4 | Hint1 Histidine triad nucleotide-binding protein 1                            | 22.33 | 87.3  | 15 |
| 448 | IPI:IPI00875405.1 | Psm1 111 kDa protein                                                          | 22.33 | 11.08 | 8  |
| 449 | IPI:IPI00309035.2 | Rpn1 Dolichyl-diphosphooligosaccharide--protein glycosyltransferase subunit 1 | 22.26 | 13.16 | 8  |
| 450 | IPI:IPI00876202.1 | Nap1l4 Nucleosome assembly protein 1-like 4                                   | 22.26 | 33.33 | 16 |
| 451 | IPI:IPI00136498.1 | Lin7c Protein lin-7 homolog C                                                 | 22.24 | 48.73 | 9  |
| 452 | IPI:IPI00111181.1 | Vps35 Vacuolar protein sorting-associated protein 35                          | 22.21 | 13.19 | 8  |
| 453 | IPI:IPI00273164.1 | Aldh5a1 Succinate-semialdehyde dehydrogenase, mitochondrial                   | 22.21 | 16.25 | 6  |
| 454 | IPI:IPI00928416.1 | Ndufv1 Uncharacterized protein                                                | 22.17 | 28.35 | 13 |
| 455 | IPI:IPI00123624.8 | 2610301G19Rik Protein KIAA1967 homolog                                        | 22.17 | 20.5  | 15 |
| 456 | IPI:IPI00113794.1 | Rom1 Rod outer segment membrane protein 1                                     | 22.13 | 29.63 | 9  |
| 457 | IPI:IPI00421267.1 | Plec Isoform PLEC-1D of Plectin                                               | 22.07 | 5.941 | 20 |
| 458 | IPI:IPI00116356.5 | Ap2m1 AP-2 complex subunit mu                                                 | 22    | 30.57 | 14 |
| 459 | IPI:IPI00757181.1 | LOC100045958 similar to hCG45299 isoform 3                                    | 21.94 | 51.49 | 15 |
| 460 | IPI:IPI00830707.1 | Cdh2 Uncharacterized protein                                                  | 21.92 | 23.2  | 14 |
| 461 | IPI:IPI00132728.2 | Cyc1 Isoform 1 of Cytochrome c1, heme protein, mitochondrial                  | 21.9  | 53.54 | 16 |
| 462 | IPI:IPI00323809.3 | Palm Isoform 2 of Paralemmin                                                  | 21.84 | 39.82 | 9  |
| 463 | IPI:IPI00625248.3 | Impa1 inositol monophosphatase 1                                              | 21.79 | 38.63 | 9  |
| 464 | IPI:IPI00380436.1 | Actn1 Alpha-actinin-1                                                         | 21.74 | 37.11 | 32 |
| 465 | IPI:IPI00338536.1 | Sdhb Succinate dehydrogenase [ubiquinone] iron-sulfur subunit, mitochondrial  | 21.7  | 31.91 | 14 |
| 466 | IPI:IPI00849478.1 | LOC100047252 similar to Phosphoserine aminotransferase 1 isoform 1            | 21.62 | 17.84 | 8  |

|     |                   |                                                                           |       |       |     |
|-----|-------------------|---------------------------------------------------------------------------|-------|-------|-----|
| 467 | IPI:IPI00111013.1 | Ctsd Cathepsin D                                                          | 21.55 | 30    | 9   |
| 468 | IPI:IPI00113869.1 | Bsg Isoform 2 of Basigin                                                  | 21.54 | 42.49 | 16  |
| 469 | IPI:IPI00649950.3 | Eftud2 116 kDa U5 small nuclear ribonucleoprotein component isoform b     | 21.53 | 15.12 | 14  |
| 470 | IPI:IPI00130589.8 | Sod1 Superoxide dismutase [Cu-Zn]                                         | 21.52 | 77.27 | 21  |
| 471 | IPI:IPI00881096.1 | Napg Uncharacterized protein                                              | 21.51 | 30.88 | 9   |
| 472 | IPI:IPI00353563.4 | Fscn1 Fascin                                                              | 21.51 | 24.95 | 9   |
| 473 | IPI:IPI00751607.1 | LOC100045958 similar to hCG45299 isoform 2                                | 21.5  | 50.17 | 11  |
| 474 | IPI:IPI00109813.1 | Hnrnpa0 heterogeneous nuclear ribonucleoprotein A0                        | 21.43 | 40.98 | 21  |
| 475 | IPI:IPI00117978.1 | Cox4i1 Cytochrome c oxidase subunit 4 isoform 1, mitochondrial            | 21.43 | 45.56 | 16  |
| 476 | IPI:IPI00229294.1 | Epb4.1l3 Isoform 2 of Band 4.1-like protein 3                             | 21.36 | 32.37 | 27  |
| 477 | IPI:IPI00230754.5 | Slc25a11 Mitochondrial 2-oxoglutarate/malate carrier protein              | 21.32 | 44.59 | 14  |
| 478 | IPI:IPI00116940.5 | Gngt1 Guanine nucleotide-binding protein G(T) subunit gamma-T1            | 21.27 | 63.51 | 35  |
| 479 | IPI:IPI00112251.1 | Tubb3 Tubulin beta-3 chain                                                | 21.23 | 73.11 | 147 |
| 480 | IPI:IPI00130252.1 | Rs1 Retinoschisin                                                         | 21.17 | 44.2  | 14  |
| 481 | IPI:IPI00129519.3 | Basp1 Brain acid soluble protein 1                                        | 21.16 | 41.59 | 6   |
| 482 | IPI:IPI00124787.3 | Arl3 ADP-ribosylation factor-like protein 3                               | 21.14 | 64.29 | 13  |
| 483 | IPI:IPI00308217.1 | Adsl Adenylosuccinate lyase                                               | 21.09 | 34.92 | 16  |
| 484 | IPI:IPI00515505.3 | Srsf1 Isoform 3 of Serine/arginine-rich splicing factor 1                 | 21.07 | 45.92 | 13  |
| 485 | IPI:IPI00408796.3 | Sf3a1 Splicing factor 3A subunit 1                                        | 21.04 | 14.54 | 9   |
| 486 | IPI:IPI00462445.2 | Nedd4 E3 ubiquitin-protein ligase NEDD4                                   | 21.03 | 12.06 | 9   |
| 487 | IPI:IPI00622911.1 | Ap2a1 Isoform B of AP-2 complex subunit alpha-1                           | 21.02 | 25.13 | 21  |
| 488 | IPI:IPI00315999.4 | Atp6v1f V-type proton ATPase subunit F                                    | 21.02 | 77.31 | 14  |
| 489 | IPI:IPI00131674.3 | 2210010C04Rik trypsinogen 7                                               | 21.01 | 30.77 | 36  |
| 490 | IPI:IPI00133977.3 | Nap1l4 Putative uncharacterized protein                                   | 21    | 36.26 | 20  |
| 491 | IPI:IPI00626994.3 | Ipo5 Isoform 1 of Importin-5                                              | 20.98 | 9.936 | 7   |
| 492 | IPI:IPI00109482.3 | Ddah1 N(G),N(G)-dimethylarginine dimethylaminohydrolase 1                 | 20.97 | 51.93 | 19  |
| 493 | IPI:IPI00323911.3 | Gsta4 Glutathione S-transferase A4                                        | 20.85 | 39.64 | 13  |
| 494 | IPI:IPI00153107.3 | Blmh Bleomycin hydrolase                                                  | 20.84 | 23.74 | 9   |
| 495 | IPI:IPI00270326.1 | Psmc2 Putative uncharacterized protein                                    | 20.84 | 27.79 | 13  |
| 496 | IPI:IPI00124221.1 | Atp1b3 Sodium/potassium-transporting ATPase subunit beta-3                | 20.83 | 39.57 | 15  |
| 497 | IPI:IPI00894588.1 | Acadl long-chain specific acyl-CoA dehydrogenase, mitochondrial precursor | 20.79 | 26.28 | 14  |
| 498 | IPI:IPI00134621.3 | Ran;LOC100045999 GTP-binding nuclear protein Ran                          | 20.76 | 58.8  | 15  |
| 499 | IPI:IPI00776187.1 | Myo6 Putative uncharacterized protein                                     | 20.73 | 14.45 | 16  |
| 500 | IPI:IPI00230418.5 | Vsnl1 Visinin-like protein 1                                              | 20.73 | 47.12 | 13  |

|     |                   |                                                                               |       |       |    |
|-----|-------------------|-------------------------------------------------------------------------------|-------|-------|----|
| 501 | IPI:IPI00653617.1 | Snap91 Putative uncharacterized protein                                       | 20.68 | 21.6  | 18 |
| 502 | IPI:IPI00331066.6 | Calb1 Calbindin                                                               | 20.66 | 58.62 | 17 |
| 503 | IPI:IPI00131406.1 | Psma7 Proteasome subunit alpha type-7                                         | 20.62 | 59.68 | 12 |
| 504 | IPI:IPI00410883.1 | Set Isoform 2 of Protein SET                                                  | 20.62 | 39.35 | 16 |
| 505 | IPI:IPI00649292.1 | Myh2 Myosin, heavy polypeptide 2, skeletal muscle, adult                      | 20.55 | 11.51 | 16 |
| 506 | IPI:IPI00127841.3 | Slc25a5 ADP/ATP translocase 2                                                 | 20.54 | 57.38 | 42 |
| 507 | IPI:IPI00121596.4 | Prpf8 Pre-mRNA-processing-splicing factor 8                                   | 20.53 | 6.552 | 9  |
| 508 | IPI:IPI00132080.1 | Pgls 6-phosphogluconolactonase                                                | 20.46 | 44.75 | 9  |
| 509 | IPI:IPI00153340.1 | Cplx3 Complexin-3                                                             | 20.45 | 54.43 | 21 |
| 510 | IPI:IPI00749860.1 | Cdh2;LOC100044363 cadherin-2 precursor                                        | 20.41 | 19.43 | 11 |
| 511 | IPI:IPI00131871.1 | Cops4 COP9 signalosome complex subunit 4                                      | 20.35 | 29.56 | 9  |
| 512 | IPI:IPI00677454.2 | Cbx3 Chromobox homolog 3                                                      | 20.35 | 42.62 | 9  |
| 513 | IPI:IPI00119785.2 | C2cd2l C2 domain-containing protein 2-like                                    | 20.33 | 26.35 | 15 |
| 514 | IPI:IPI00137227.1 | Rab2a Ras-related protein Rab-2A                                              | 20.3  | 50    | 9  |
| 515 | IPI:IPI00742334.1 | Kpnb1 importin subunit beta-1                                                 | 20.27 | 15.3  | 11 |
| 516 | IPI:IPI00788417.1 | Pde6b rod cGMP-specific 3',5'-cyclic phosphodiesterase subunit beta precursor | 20.26 | 30.26 | 30 |
| 517 | IPI:IPI00625738.3 | Dnm3 Isoform 2 of Dynamin-3                                                   | 20.26 | 24.56 | 17 |
| 518 | IPI:IPI00132966.3 | Ppid Peptidyl-prolyl cis-trans isomerase D                                    | 20.23 | 33.51 | 21 |
| 519 | IPI:IPI00626312.1 | Gm6136 similar to ribosomal protein L6                                        | 20.23 | 28.38 | 7  |
| 520 | IPI:IPI00653423.2 | Bcat1 Branched-chain-amino-acid aminotransferase                              | 20.15 | 36.27 | 15 |
| 521 | IPI:IPI00126042.3 | Rab14 Ras-related protein Rab-14                                              | 20.12 | 62.79 | 17 |
| 522 | IPI:IPI00133240.1 | Uqcrfs1 Cytochrome b-c1 complex subunit Rieske, mitochondrial                 | 20.1  | 53.28 | 14 |
| 523 | IPI:IPI00653007.1 | Actc1 Putative uncharacterized protein                                        | 20.07 | 71.88 | 67 |
| 524 | IPI:IPI00135186.1 | Calu Calumenin                                                                | 20.02 | 32.06 | 9  |
| 525 | IPI:IPI00465810.3 | Sv2a Synaptic vesicle glycoprotein 2A                                         | 20    | 11.19 | 9  |
| 526 | IPI:IPI00318841.4 | Eef1g Elongation factor 1-gamma                                               | 19.88 | 22.65 | 9  |
| 527 | IPI:IPI00132456.1 | 2700060E02Rik UPF0568 protein C14orf166 homolog                               | 19.88 | 47.13 | 9  |
| 528 | IPI:IPI00128986.1 | Tagln3 Transgelin-3                                                           | 19.86 | 52.76 | 16 |
| 529 | IPI:IPI00222398.5 | Crygc Gamma-crystallin C                                                      | 19.86 | 70.69 | 78 |
| 530 | IPI:IPI00134961.1 | Acadm Medium-chain specific acyl-CoA dehydrogenase, mitochondrial             | 19.84 | 21.14 | 8  |
| 531 | IPI:IPI00122965.1 | Rab3a Ras-related protein Rab-3A                                              | 19.82 | 55.45 | 20 |
| 532 | IPI:IPI00331394.3 | Dnpep aspartyl aminopeptidase isoform a                                       | 19.82 | 29.89 | 15 |
| 533 | IPI:IPI00970652.1 | Pcmt1 protein-L-isoaspartate(D-aspartate) O-methyltransferase                 | 19.82 | 51.23 | 12 |
| 534 | IPI:IPI00116753.4 | Etfa Electron transfer flavoprotein subunit alpha, mitochondrial              | 19.78 | 47.15 | 14 |
| 535 | IPI:IPI00114162.3 | Fabp5 Fatty acid-binding protein, epidermal                                   | 19.75 | 64.44 | 21 |



|     |                   |                                                                                   |       |       |    |
|-----|-------------------|-----------------------------------------------------------------------------------|-------|-------|----|
| 536 | IPI:IPI00754487.1 | - similar to ribosomal protein L3 isoform 1                                       | 19.75 | 21.59 | 8  |
| 537 | IPI:IPI00130530.1 | Grhpr Glyoxylate reductase/hydroxypyruvate reductase                              | 19.59 | 26.83 | 7  |
| 538 | IPI:IPI00138342.3 | Es1 Liver carboxylesterase N                                                      | 19.58 | 21.48 | 8  |
| 539 | IPI:IPI00348531.6 | Gm14743 Novel protein similar to odorant binding protein Ib Obp1b                 | 19.37 | 60.23 | 15 |
| 540 | IPI:IPI00555000.2 | Uqcrb Cytochrome b-c1 complex subunit 7                                           | 19.34 | 52.25 | 8  |
| 541 | IPI:IPI00313841.1 | Atp6v0d1 V-type proton ATPase subunit d 1                                         | 19.3  | 33.62 | 9  |
| 542 | IPI:IPI00408176.2 | Csnk2a1;Gm10031 casein kinase II subunit alpha                                    | 19.29 | 34.27 | 14 |
| 543 | IPI:IPI00221890.6 | Car3 Carbonic anhydrase 3                                                         | 19.23 | 54.62 | 18 |
| 544 | IPI:IPI00311236.1 | Rpl7 60S ribosomal protein L7                                                     | 19.2  | 22.59 | 9  |
| 545 | IPI:IPI00875742.1 | Ilf2 Putative uncharacterized protein                                             | 19.18 | 43.59 | 11 |
| 546 | IPI:IPI00127050.1 | Ppa2 Isoform 1 of Inorganic pyrophosphatase 2, mitochondrial                      | 19.11 | 50.61 | 13 |
| 547 | IPI:IPI00277026.1 | Anp32e Isoform 2 of Acidic leucine-rich nuclear phosphoprotein 32 family member E | 19.11 | 45.56 | 26 |
| 548 | IPI:IPI00132874.4 | Mgll Putative uncharacterized protein                                             | 19.09 | 43.07 | 15 |
| 549 | IPI:IPI00856904.1 | Add1 73 kDa protein                                                               | 19.09 | 23.03 | 11 |
| 550 | IPI:IPI00139795.2 | Rplp2 60S acidic ribosomal protein P2                                             | 19.06 | 92.17 | 17 |
| 551 | IPI:IPI00776023.1 | Pls3 Plastin 3                                                                    | 19.02 | 12.68 | 8  |
| 552 | IPI:IPI00118880.5 | Gucy1b3 Guanylate cyclase soluble subunit beta-1                                  | 19.01 | 13.71 | 7  |
| 553 | IPI:IPI00132089.2 | Prep Putative uncharacterized protein                                             | 18.93 | 12.72 | 8  |
| 554 | IPI:IPI00117167.2 | Gsn Isoform 1 of Gelsolin                                                         | 18.9  | 24.23 | 12 |
| 555 | IPI:IPI00230677.1 | Acin1 Isoform 4 of Apoptotic chromatin condensation inducer in the nucleus        | 18.89 | 12.33 | 13 |
| 556 | IPI:IPI00169925.2 | Ndufv2 Isoform 1 of NADH dehydrogenase [ubiquinone] flavoprotein 2, mitochondrial | 18.86 | 39.52 | 11 |
| 557 | IPI:IPI00116192.1 | Prdx3 Thioredoxin-dependent peroxide reductase, mitochondrial                     | 18.8  | 41.25 | 16 |
| 558 | IPI:IPI00853924.1 | Ywhaq 34 kDa protein                                                              | 18.76 | 53.47 | 40 |
| 559 | IPI:IPI00108895.1 | Psmc4 26S protease regulatory subunit 6B                                          | 18.76 | 30.86 | 9  |
| 560 | IPI:IPI00461469.3 | Mars Methionyl-tRNA synthetase, cytoplasmic                                       | 18.75 | 14.08 | 11 |
| 561 | IPI:IPI00857896.1 | 6430548M08Rik hypothetical protein LOC234797 isoform b                            | 18.7  | 17.38 | 7  |
| 562 | IPI:IPI00555004.3 | Adh5 Alcohol dehydrogenase class-3                                                | 18.64 | 25.13 | 9  |
| 563 | IPI:IPI00884460.1 | Prkca protein kinase C alpha type                                                 | 18.62 | 12.95 | 9  |
| 564 | IPI:IPI00474959.2 | Rcn2 Putative uncharacterized protein                                             | 18.57 | 26.2  | 9  |
| 565 | IPI:IPI00109109.1 | Sod2 Superoxide dismutase [Mn], mitochondrial                                     | 18.56 | 45.05 | 14 |
| 566 | IPI:IPI00132314.1 | Nucb1 Nucleobindin-1                                                              | 18.55 | 20.04 | 7  |
| 567 | IPI:IPI00474883.2 | Capzb Capping protein (Actin filament) muscle Z-line, beta                        | 18.45 | 28.9  | 9  |
| 568 | IPI:IPI00132705.1 | My12b Myosin regulatory light chain 12B                                           | 18.43 | 49.42 | 7  |
| 569 | IPI:IPI00133985.1 | Ruvbl1 RuvB-like 1                                                                | 18.4  | 32.68 | 9  |

|     |                   |                                                                                        |       |       |    |
|-----|-------------------|----------------------------------------------------------------------------------------|-------|-------|----|
| 570 | IPI:IPI00123494.3 | Psm2 26S proteasome non-ATPase regulatory subunit 2                                    | 18.4  | 12.22 | 9  |
| 571 | IPI:IPI00876005.1 | - 11 kDa protein                                                                       | 18.37 | 53.85 | 12 |
| 572 | IPI:IPI00116308.1 | St13 Hsc70-interacting protein                                                         | 18.36 | 25.34 | 9  |
| 573 | IPI:IPI00283511.1 | Pdxk Pyridoxal kinase                                                                  | 18.34 | 32.05 | 9  |
| 574 | IPI:IPI00338515.4 | Rprd1b Isoform 1 of Regulation of nuclear pre-mRNA domain-containing protein 1B        | 18.31 | 23.62 | 6  |
| 575 | IPI:IPI00347814.2 | BC085271 cDNA sequence BC085271                                                        | 18.31 | 33.22 | 11 |
| 576 | IPI:IPI00762897.2 | Uggt1 UDP-glucose:glycoprotein glucosyltransferase 1                                   | 18.27 | 8.769 | 9  |
| 577 | IPI:IPI00125971.1 | Psmc6 26S protease regulatory subunit 10B                                              | 18.23 | 29.05 | 12 |
| 578 | IPI:IPI00648683.3 | Ap1b1 Putative uncharacterized protein                                                 | 18.21 | 23.61 | 20 |
| 579 | IPI:IPI00230035.7 | Ddx3x ATP-dependent RNA helicase DDX3X                                                 | 18.18 | 24.02 | 16 |
| 580 | IPI:IPI00467057.3 | Cplx4 Complexin-4                                                                      | 18.18 | 63.13 | 19 |
| 581 | IPI:IPI00265471.2 | Adsl Putative uncharacterized protein                                                  | 18.17 | 26.45 | 9  |
| 582 | IPI:IPI00828744.1 | Krt10 Isoform 2 of Keratin, type I cytoskeletal 10                                     | 18.15 | 24.96 | 13 |
| 583 | IPI:IPI00754992.1 | Rpn2 Ribophorin II                                                                     | 18.14 | 20.16 | 9  |
| 584 | IPI:IPI00132208.1 | Dnaja1 DnaJ homolog subfamily A member 1                                               | 18.12 | 35.26 | 12 |
| 585 | IPI:IPI00130460.1 | Ndufv1 NADH dehydrogenase [ubiquinone] flavoprotein 1, mitochondrial                   | 18.1  | 24.14 | 8  |
| 586 | IPI:IPI00848492.1 | LOC100045699 similar to Electron transferring flavoprotein, beta polypeptide isoform 2 | 18.08 | 32.56 | 9  |
| 587 | IPI:IPI00830623.1 | Fus 53 kDa protein                                                                     | 18.08 | 17.21 | 8  |
| 588 | IPI:IPI00875325.1 | Aco1 cytoplasmic aconitate hydratase                                                   | 18.03 | 20.92 | 14 |
| 589 | IPI:IPI00875924.1 | Dnpep aspartyl aminopeptidase isoform b                                                | 18.02 | 25.37 | 8  |
| 590 | IPI:IPI00762871.2 | Atp1a2 Uncharacterized protein                                                         | 18.01 | 40.55 | 93 |
| 591 | IPI:IPI00129164.1 | Spr sepiapterin reductase                                                              | 18.01 | 35.88 | 9  |
| 592 | IPI:IPI00399449.1 | Nsfl1c Isoform 1 of NSFL1 cofactor p47                                                 | 18    | 33.51 | 9  |
| 593 | IPI:IPI00466128.3 | Akr1a4 Alcohol dehydrogenase [NADP+]                                                   | 18    | 33.51 | 12 |
| 594 | IPI:IPI00135965.2 | Ina Alpha-internexin                                                                   | 17.97 | 25.2  | 14 |
| 595 | IPI:IPI00468900.5 | Atp2a2 Isoform SERCA2A of Sarcoplasmic/endoplasmic reticulum calcium ATPase 2          | 17.96 | 23.35 | 34 |
| 596 | IPI:IPI00125901.5 | Rps13;Gm10159;Rps13-ps1;LOC100048340;LOC100044992 40S ribosomal protein S13            | 17.93 | 41.72 | 8  |
| 597 | IPI:IPI00119203.4 | Acadv1 Very long-chain specific acyl-CoA dehydrogenase, mitochondrial                  | 17.93 | 25.91 | 11 |
| 598 | IPI:IPI00322150.8 | Thop1 Thimet oligopeptidase                                                            | 17.92 | 17.76 | 9  |
| 599 | IPI:IPI00387557.3 | Actn2 alpha-actinin-2                                                                  | 17.88 | 23.94 | 21 |
| 600 | IPI:IPI00118821.2 | Pafah1b2 Platelet-activating factor acetylhydrolase IB subunit beta                    | 17.85 | 24.45 | 6  |
| 601 | IPI:IPI00130343.2 | Hnrnpc Putative uncharacterized protein                                                | 17.84 | 33.83 | 14 |
| 602 | IPI:IPI00225961.5 | Phgdh D-3-phosphoglycerate dehydrogenase                                               | 17.78 | 21.2  | 9  |

|     |                   |                                                                                                                                                         |       |       |    |
|-----|-------------------|---------------------------------------------------------------------------------------------------------------------------------------------------------|-------|-------|----|
| 603 | IPI:IPI00124614.1 | Epm2aip1 EPM2A-interacting protein 1                                                                                                                    | 17.77 | 19.8  | 9  |
| 604 | IPI:IPI00121309.2 | Ndufs3 NADH dehydrogenase [ubiquinone] iron-sulfur protein 3, mitochondrial                                                                             | 17.71 | 34.22 | 9  |
| 605 | IPI:IPI00759948.1 | Gsn Isoform 2 of Gelsolin                                                                                                                               | 17.61 | 19.02 | 9  |
| 606 | IPI:IPI00120212.1 | Ndufa9 NADH dehydrogenase [ubiquinone] 1 alpha subcomplex subunit 9, mitochondrial                                                                      | 17.57 | 28.38 | 9  |
| 607 | IPI:IPI00114285.1 | Gsto1 Glutathione S-transferase omega-1                                                                                                                 | 17.56 | 31.25 | 16 |
| 608 | IPI:IPI00109169.1 | Idh3g Isocitrate dehydrogenase [NAD] subunit gamma, mitochondrial                                                                                       | 17.48 | 32.57 | 9  |
| 609 | IPI:IPI00856927.1 | Rps19 Uncharacterized protein                                                                                                                           | 17.43 | 43.48 | 9  |
| 610 | IPI:IPI00224070.2 | Arhgap1 rho GTPase-activating protein 1 isoform 1                                                                                                       | 17.43 | 30.27 | 15 |
| 611 | IPI:IPI00420569.2 | Atp1a2 Sodium/potassium-transporting ATPase subunit alpha-2                                                                                             | 17.42 | 34.9  | 78 |
| 612 | IPI:IPI00649886.1 | Syn1 Isoform Ia of Synapsin-1                                                                                                                           | 17.38 | 17.71 | 9  |
| 613 | IPI:IPI00115977.1 | Me2 NAD-dependent malic enzyme, mitochondrial                                                                                                           | 17.28 | 22.24 | 9  |
| 614 | IPI:IPI00230084.5 | Aldh7a1 Isoform 1 of Alpha-aminoadipic semialdehyde dehydrogenase                                                                                       | 17.23 | 32.28 | 12 |
| 615 | IPI:IPI00462006.3 | Rpl7a-ps5 Uncharacterized protein                                                                                                                       | 17.22 | 30.3  | 11 |
| 616 | IPI:IPI00467383.2 | Cul3 Cullin-3                                                                                                                                           | 17.17 | 9.896 | 7  |
| 617 | IPI:IPI00112549.1 | Acs1 Long-chain-fatty-acid--CoA ligase 1                                                                                                                | 17.15 | 13.73 | 8  |
| 618 | IPI:IPI00330754.1 | Bdh1 D-beta-hydroxybutyrate dehydrogenase, mitochondrial                                                                                                | 17.08 | 21.28 | 9  |
| 619 | IPI:IPI00137848.1 | Sf3a3 Splicing factor 3A subunit 3                                                                                                                      | 17.06 | 21.96 | 8  |
| 620 | IPI:IPI00474281.1 | Gm13910 similar to Hydroxyacyl-Coenzyme A dehydrogenase/3-ketoacyl-Coenzyme A thiolase/enoyl-Coenzyme A hydratase (trifunctional protein), beta subunit | 17    | 24.84 | 9  |
| 621 | IPI:IPI00223415.4 | Nars Asparaginyl-tRNA synthetase, cytoplasmic                                                                                                           | 16.99 | 20.39 | 9  |
| 622 | IPI:IPI00108125.4 | Eif5a Eukaryotic translation initiation factor 5A-1                                                                                                     | 16.99 | 53.25 | 16 |
| 623 | IPI:IPI00343557.1 | Mapre3 Microtubule-associated protein RP/EB family member 3                                                                                             | 16.96 | 27.4  | 9  |
| 624 | IPI:IPI00313222.5 | Rpl6 60S ribosomal protein L6                                                                                                                           | 16.96 | 34.12 | 9  |
| 625 | IPI:IPI00177038.1 | Actr2 Actin-related protein 2                                                                                                                           | 16.91 | 31.47 | 9  |
| 626 | IPI:IPI00223875.1 | Asrgl1 L-asparaginase                                                                                                                                   | 16.91 | 28.22 | 9  |
| 627 | IPI:IPI00880610.1 | 5730469M10Rik Putative uncharacterized protein                                                                                                          | 16.72 | 27.07 | 9  |
| 628 | IPI:IPI00355382.2 | Wars Isoform 2 of Tryptophanyl-tRNA synthetase, cytoplasmic                                                                                             | 16.71 | 20    | 9  |
| 629 | IPI:IPI00395038.3 | Xpo1 Exportin-1                                                                                                                                         | 16.65 | 10.46 | 9  |
| 630 | IPI:IPI00134746.5 | Ass1 Argininosuccinate synthase                                                                                                                         | 16.62 | 25.97 | 8  |
| 631 | IPI:IPI00828412.1 | Rbbp4 histone-binding protein RBBP4                                                                                                                     | 16.62 | 24.24 | 8  |
| 632 | IPI:IPI00116222.1 | Hibadh 3-hydroxyisobutyrate dehydrogenase, mitochondrial                                                                                                | 16.61 | 37.61 | 14 |
| 633 | IPI:IPI00121079.3 | Cyb5r3 Isoform 1 of NADH-cytochrome b5 reductase 3                                                                                                      | 16.61 | 36.21 | 9  |

|     |                   |                                                                                            |       |       |    |
|-----|-------------------|--------------------------------------------------------------------------------------------|-------|-------|----|
| 634 | IPI:IPI00118654.2 | Pdxp Pyridoxal phosphate phosphatase                                                       | 16.56 | 38.7  | 8  |
| 635 | IPI:IPI00858047.1 | Mgll Uncharacterized protein                                                               | 16.54 | 36.25 | 13 |
| 636 | IPI:IPI00377731.2 | 6430548M08Rik Uncharacterized protein KIAA0513                                             | 16.53 | 22.36 | 9  |
| 637 | IPI:IPI00853859.1 | Sec31a Isoform 2 of Protein transport protein Sec31A                                       | 16.48 | 10.33 | 9  |
| 638 | IPI:IPI00133428.3 | Psmc1 26S protease regulatory subunit 4                                                    | 16.45 | 26.59 | 9  |
| 639 | IPI:IPI00227900.1 | Prkaca Isoform 2 of cAMP-dependent protein kinase catalytic subunit alpha                  | 16.39 | 31.49 | 9  |
| 640 | IPI:IPI00137331.6 | Cap1 Adenylyl cyclase-associated protein 1                                                 | 16.38 | 26.37 | 15 |
| 641 | IPI:IPI00387580.1 | Add3 gamma-adducin isoform a                                                               | 16.36 | 26.77 | 9  |
| 642 | IPI:IPI00123140.2 | Fyco1 FYVE and coiled-coil domain-containing protein 1                                     | 16.33 | 9.875 | 8  |
| 643 | IPI:IPI00750262.1 | Rprd1b regulation of nuclear pre-mRNA domain-containing protein 1B                         | 16.33 | 30.77 | 9  |
| 644 | IPI:IPI00153317.3 | Aldh1l1 10-formyltetrahydrofolate dehydrogenase                                            | 16.29 | 10.31 | 7  |
| 645 | IPI:IPI00228978.2 | Cltb Isoform 1 of Clathrin light chain B                                                   | 16.21 | 37.12 | 9  |
| 646 | IPI:IPI00126115.1 | Sfxn3 Isoform 1 of Sideroflexin-3                                                          | 16.2  | 40.19 | 9  |
| 647 | IPI:IPI00944688.1 | Pdcd6ip programmed cell death 6-interacting protein isoform 2                              | 16.18 | 15.48 | 9  |
| 648 | IPI:IPI00227865.1 | Myh11 Isoform 2 of Myosin-11                                                               | 16.17 | 10.78 | 17 |
| 649 | IPI:IPI00313475.1 | Atp5c1 ATP synthase subunit gamma, mitochondrial                                           | 16.15 | 29.87 | 12 |
| 650 | IPI:IPI00742438.1 | Prkacb Isoform 3 of cAMP-dependent protein kinase catalytic subunit beta                   | 16.14 | 30.09 | 10 |
| 651 | IPI:IPI00263863.8 | Hspe1 10 kDa heat shock protein, mitochondrial                                             | 16.14 | 67.65 | 9  |
| 652 | IPI:IPI00830558.1 | Bpnt1 Uncharacterized protein                                                              | 16.12 | 52.57 | 13 |
| 653 | IPI:IPI00318545.3 | Bpnt1 3'(2'),5'-bisphosphate nucleotidase 1                                                | 15.95 | 33.77 | 9  |
| 654 | IPI:IPI00111265.3 | Capza2 F-actin-capping protein subunit alpha-2                                             | 15.93 | 39.51 | 9  |
| 655 | IPI:IPI00123862.1 | Ppp1cc Isoform Gamma-1 of Serine/threonine-protein phosphatase PP1-gamma catalytic subunit | 15.89 | 30.03 | 9  |
| 656 | IPI:IPI00283862.6 | Psma1 Proteasome subunit alpha type-1                                                      | 15.88 | 43.35 | 9  |
| 657 | IPI:IPI00751137.1 | Tomm70a Putative uncharacterized protein                                                   | 15.87 | 14.57 | 7  |
| 658 | IPI:IPI00857603.1 | Cacna2d2 Isoform 2 of Voltage-dependent calcium channel subunit alpha-2/delta-2            | 15.78 | 8.362 | 8  |
| 659 | IPI:IPI00420261.5 | Hmgb1;Gm15387 High mobility group protein B1                                               | 15.76 | 41.4  | 12 |
| 660 | IPI:IPI00110864.3 | Crygf Gamma-crystallin F                                                                   | 15.74 | 57.47 | 27 |
| 661 | IPI:IPI00114667.1 | Psmd7 26S proteasome non-ATPase regulatory subunit 7                                       | 15.67 | 32.09 | 9  |
| 662 | IPI:IPI00125880.1 | Pacsin2 Protein kinase C and casein kinase substrate in neurons protein 2                  | 15.66 | 20.99 | 9  |
| 663 | IPI:IPI00113845.1 | Psmb1 Proteasome subunit beta type-1                                                       | 15.58 | 41.25 | 9  |
| 664 | IPI:IPI00331710.1 | Acad9 Acyl-CoA dehydrogenase family member 9, mitochondrial                                | 15.56 | 20    | 10 |

|     |                   |                                                                                            |       |       |    |
|-----|-------------------|--------------------------------------------------------------------------------------------|-------|-------|----|
| 665 | IPI:IPI00755843.1 | Set SET translocation                                                                      | 15.56 | 60.93 | 10 |
| 666 | IPI:IPI00128522.1 | Hspb1 Isoform A of Heat shock protein beta-1                                               | 15.51 | 48.33 | 9  |
| 667 | IPI:IPI00121760.5 | Hnrpll Isoform 1 of Heterogeneous nuclear ribonucleoprotein L-like                         | 15.48 | 19.12 | 8  |
| 668 | IPI:IPI00110885.2 | Cyb5r3 Putative uncharacterized protein                                                    | 15.44 | 26.84 | 8  |
| 669 | IPI:IPI00753870.1 | Tpd52l2 Tumor protein D52-like 2, isoform CRA_a                                            | 15.43 | 46.24 | 8  |
| 670 | IPI:IPI00869430.1 | Cap1 Adenylyl cyclase-associated protein                                                   | 15.42 | 22.15 | 8  |
| 671 | IPI:IPI00124684.1 | Tsn Translin                                                                               | 15.4  | 39.47 | 9  |
| 672 | IPI:IPI00623845.3 | Selenbp1;LOC100044204 Selenium-binding protein 1                                           | 15.37 | 22.88 | 9  |
| 673 | IPI:IPI00877345.1 | Hpx hemopexin precursor                                                                    | 15.25 | 20.43 | 9  |
| 674 | IPI:IPI00131315.1 | Unc119 Protein unc-119 homolog A                                                           | 15.25 | 37.92 | 9  |
| 675 | IPI:IPI00121105.2 | Hadh Hydroxyacyl-coenzyme A dehydrogenase, mitochondrial                                   | 15.21 | 29.3  | 14 |
| 676 | IPI:IPI00132475.2 | Lman1 Putative uncharacterized protein                                                     | 15.2  | 21.21 | 9  |
| 677 | IPI:IPI00466514.3 | Abpd Androgen-binding protein delta                                                        | 15.19 | 69.64 | 8  |
| 678 | IPI:IPI00187407.4 | Cops8 COP9 signalosome complex subunit 8                                                   | 15.18 | 51.67 | 8  |
| 679 | IPI:IPI00331163.9 | Skp1a S-phase kinase-associated protein 1                                                  | 15.13 | 47.24 | 8  |
| 680 | IPI:IPI00884508.1 | Slc2a1 solute carrier family 2, facilitated glucose transporter member 1                   | 15.11 | 11.99 | 10 |
| 681 | IPI:IPI00115627.4 | Actr3 Actin-related protein 3                                                              | 15.08 | 25.12 | 9  |
| 682 | IPI:IPI00922962.1 | Acin1 apoptotic chromatin condensation inducer 1 isoform 2                                 | 15.08 | 8.595 | 8  |
| 683 | IPI:IPI00319602.3 | Cnp Isoform CNPII of 2',3'-cyclic-nucleotide 3'-phosphodiesterase                          | 15.05 | 17.38 | 7  |
| 684 | IPI:IPI00229884.1 | Pak2 Serine/threonine-protein kinase PAK 2                                                 | 15.04 | 21.76 | 9  |
| 685 | IPI:IPI00469793.3 | Gnas Isoform XLas-4 of Guanine nucleotide-binding protein G(s) subunit alpha isoforms XLas | 14.97 | 10.55 | 17 |
| 686 | IPI:IPI00118723.3 | Ppp2r4 Serine/threonine-protein phosphatase 2A activator                                   | 14.93 | 35.6  | 8  |
| 687 | IPI:IPI00221825.1 | Clic6 Chloride intracellular channel protein 6                                             | 14.8  | 23.32 | 9  |
| 688 | IPI:IPI00135869.3 | Rab11b Ras-related protein Rab-11B                                                         | 14.79 | 41.74 | 9  |
| 689 | IPI:IPI00928581.1 | Psap sulfated glycoprotein 1 isoform D preproprotein                                       | 14.76 | 12.3  | 8  |
| 690 | IPI:IPI00755892.1 | Hnrpdl heterogeneous nuclear ribonucleoprotein D-like                                      | 14.76 | 35.88 | 13 |
| 691 | IPI:IPI00474386.1 | Add3 gamma-adducin isoform b                                                               | 14.75 | 28.04 | 9  |
| 692 | IPI:IPI00848818.1 | Mtap4 microtubule-associated protein 4                                                     | 14.68 | 16.71 | 11 |
| 693 | IPI:IPI00120457.1 | Fdps Farnesyl pyrophosphate synthase                                                       | 14.67 | 24.93 | 8  |
| 694 | IPI:IPI00928020.1 | Otub1 Uncharacterized protein                                                              | 14.66 | 29.88 | 8  |
| 695 | IPI:IPI00154004.1 | Otub1;LOC100046081 Ubiquitin thioesterase OTUB1                                            | 14.64 | 32.84 | 9  |
| 696 | IPI:IPI00129105.2 | Sae1 Isoform 1 of SUMO-activating enzyme subunit 1                                         | 14.62 | 26.86 | 7  |

|     |                   |                                                                          |       |       |    |
|-----|-------------------|--------------------------------------------------------------------------|-------|-------|----|
| 697 | IPI:IPI00124501.1 | 1110067D22Rik Galectin-related protein A                                 | 14.61 | 56.4  | 9  |
| 698 | IPI:IPI00224740.6 | Pfn1 Profilin-1                                                          | 14.61 | 50.71 | 8  |
| 699 | IPI:IPI00875943.1 | Asrgl1 36 kDa protein                                                    | 14.61 | 26.82 | 9  |
| 700 | IPI:IPI00756786.1 | Sh3glb2 SH3-domain GRB2-like endophilin B2                               | 14.6  | 32.43 | 9  |
| 701 | IPI:IPI00129512.3 | Psmb4 Proteasome subunit beta type-4                                     | 14.6  | 45.08 | 8  |
| 702 | IPI:IPI00453965.2 | Rufy3 Isoform 3 of Protein RUFY3                                         | 14.58 | 16.22 | 8  |
| 703 | IPI:IPI00956786.1 | Rpl3 Putative uncharacterized protein                                    | 14.51 | 21.59 | 8  |
| 704 | IPI:IPI00135640.1 | Psmc5 26S protease regulatory subunit 8                                  | 14.5  | 25.12 | 8  |
| 705 | IPI:IPI00874893.1 | Stx1b 32 kDa protein                                                     | 14.47 | 31.67 | 10 |
| 706 | IPI:IPI00918997.1 | Nars asparaginyl-tRNA synthetase, cytoplasmic isoform 2                  | 14.46 | 20.43 | 9  |
| 707 | IPI:IPI00828513.1 | Psmc4 26S protease regulatory subunit 6B                                 | 14.44 | 33.25 | 8  |
| 708 | IPI:IPI00128818.2 | Dhx15 Putative pre-mRNA-splicing factor ATP-dependent RNA helicase DHX15 | 14.41 | 12.7  | 9  |
| 709 | IPI:IPI00457661.5 | Psm5 26S proteasome non-ATPase regulatory subunit 5                      | 14.34 | 20.44 | 9  |
| 710 | IPI:IPI00938457.1 | Sec31a Isoform 1 of Protein transport protein Sec31A                     | 14.29 | 15.79 | 7  |
| 711 | IPI:IPI00874931.1 | Fubp1 Isoform 1 of Far upstream element-binding protein 1                | 14.29 | 16.44 | 12 |
| 712 | IPI:IPI00665513.3 | Gm6636 Uncharacterized protein                                           | 14.28 | 41.38 | 9  |
| 713 | IPI:IPI00406442.3 | Suclg1 Succinyl-CoA ligase [GDP-forming] subunit alpha, mitochondrial    | 14.27 | 22.54 | 9  |
| 714 | IPI:IPI00331345.5 | Rps3a 40S ribosomal protein S3a                                          | 14.24 | 30.68 | 7  |
| 715 | IPI:IPI00404970.2 | Arhgap1 Rho GTPase-activating protein 1                                  | 14.24 | 27.33 | 13 |
| 716 | IPI:IPI00761613.1 | Rac1 Ras-related C3 botulinum toxin substrate 1                          | 14.2  | 29.17 | 8  |
| 717 | IPI:IPI00331146.5 | Cmpk1 UMP-CMP kinase                                                     | 14.18 | 35.24 | 9  |
| 718 | IPI:IPI00116154.2 | Cox5b;LOC100046079 cytochrome c oxidase subunit 5B, mitochondrial        | 14.17 | 44.96 | 10 |
| 719 | IPI:IPI00466570.4 | Tmed10 Isoform 1 of Transmembrane emp24 domain-containing protein 10     | 14.13 | 36.53 | 9  |
| 720 | IPI:IPI00266899.6 | Fkbp1a Peptidyl-prolyl cis-trans isomerase FKBP1A                        | 14.09 | 73.15 | 9  |
| 721 | IPI:IPI00761408.2 | Lonp1 Lon protease homolog, mitochondrial                                | 14.06 | 15.79 | 9  |
| 722 | IPI:IPI00114368.3 | Sec22b Vesicle-trafficking protein SEC22b                                | 14.04 | 38.14 | 9  |
| 723 | IPI:IPI00130448.1 | Rho Rhodopsin                                                            | 14.03 | 21.55 | 19 |
| 724 | IPI:IPI00399961.2 | Api5 Putative uncharacterized protein                                    | 14.03 | 21.56 | 9  |
| 725 | IPI:IPI00131407.1 | Psma5 Proteasome subunit alpha type-5                                    | 14.03 | 38.59 | 9  |
| 726 | IPI:IPI00785410.1 | Cox5b Cytochrome c oxidase subunit 5B, mitochondrial                     | 14.01 | 50    | 9  |
| 727 | IPI:IPI00655012.2 | Huwe1 HECT, UBA and WWE domain containing 1                              | 13.94 | 2.97  | 8  |
| 728 | IPI:IPI00125602.1 | Gng13 Guanine nucleotide-binding protein G(I)/G(S)/G(O) subunit gamma-13 | 13.93 | 71.64 | 8  |
| 729 | IPI:IPI00653283.1 | Gucy1b3 guanylate cyclase soluble subunit beta-1 isoform 2               | 13.93 | 11.49 | 6  |

|     |                   |                                                                                    |       |       |    |
|-----|-------------------|------------------------------------------------------------------------------------|-------|-------|----|
| 730 | IPI:IPI00620145.1 | Kars Lysyl-tRNA synthetase                                                         | 13.92 | 18.49 | 10 |
| 731 | IPI:IPI00761269.2 | Rufy3 Isoform 4 of Protein RUFY3                                                   | 13.9  | 15.79 | 7  |
| 732 | IPI:IPI00121135.5 | Srsf2 Serine/arginine-rich splicing factor 2                                       | 13.84 | 29.41 | 12 |
| 733 | IPI:IPI00331443.3 | Farsb Putative uncharacterized protein                                             | 13.81 | 11.21 | 7  |
| 734 | IPI:IPI00651782.2 | Gbas glioblastoma amplified                                                        | 13.81 | 36.3  | 9  |
| 735 | IPI:IPI00230612.3 | Gart trifunctional purine biosynthetic protein adenosine-3                         | 13.8  | 15.25 | 9  |
| 736 | IPI:IPI00127942.4 | Dstn Destrin                                                                       | 13.66 | 41.21 | 9  |
| 737 | IPI:IPI00969838.1 | Usp7 Isoform 1 of Ubiquitin carboxyl-terminal hydrolase 7                          | 13.63 | 11.79 | 8  |
| 738 | IPI:IPI00223217.6 | Rpl13a 60S ribosomal protein L13a                                                  | 13.62 | 31.03 | 7  |
| 739 | IPI:IPI00127754.1 | Apbh androgen-binding protein eta precursor                                        | 13.51 | 63.44 | 9  |
| 740 | IPI:IPI00453819.2 | Lars Leucyl-tRNA synthetase, cytoplasmic                                           | 13.46 | 15.79 | 9  |
| 741 | IPI:IPI00228693.4 | 2310035C23Rik Isoform 1 of LisH domain and HEAT repeat-containing protein KIAA1468 | 13.44 | 6.908 | 7  |
| 742 | IPI:IPI00114925.1 | Nans Putative uncharacterized protein                                              | 13.43 | 25.91 | 7  |
| 743 | IPI:IPI00223466.2 | Rgs9 regulator of G-protein signaling 9 isoform 1                                  | 13.34 | 15.79 | 7  |
| 744 | IPI:IPI00775865.1 | Gripap1 GRIP1 associated protein 1                                                 | 13.3  | 15.03 | 7  |
| 745 | IPI:IPI00221826.1 | Srsf3 Isoform Short of Serine/arginine-rich splicing factor 3                      | 13.18 | 45.16 | 7  |
| 746 | IPI:IPI00654387.4 | Nucb1 nucleobindin-1 isoform 2                                                     | 13.16 | 23.3  | 8  |
| 747 | IPI:IPI00919200.1 | Rpl13a 48 kDa protein                                                              | 13.15 | 13.95 | 7  |
| 748 | IPI:IPI00918305.1 | Ahnak2 Protein                                                                     | 13.1  | 56.93 | 9  |
| 749 | IPI:IPI00323483.3 | Pdcd6ip Isoform 3 of Programmed cell death 6-interacting protein                   | 13.08 | 14.53 | 7  |
| 750 | IPI:IPI00119575.3 | Prkar1a Putative uncharacterized protein                                           | 13.07 | 18.61 | 8  |
| 751 | IPI:IPI00606508.1 | Gm6139 Uncharacterized protein                                                     | 13.02 | 22.87 | 7  |
| 752 | IPI:IPI00129323.1 | Srsf3 Isoform Long of Serine/arginine-rich splicing factor 3                       | 13    | 34.15 | 6  |
| 753 | IPI:IPI00459280.2 | Dcps Scavenger mRNA-decapping enzyme DcpS                                          | 12.93 | 27.81 | 9  |
| 754 | IPI:IPI00317740.5 | Gnb2l1 Guanine nucleotide-binding protein subunit beta-2-like 1                    | 12.89 | 29.34 | 9  |
| 755 | IPI:IPI00230003.7 | Pitpna Phosphatidylinositol transfer protein alpha isoform                         | 12.86 | 35.06 | 8  |
| 756 | IPI:IPI00895479.1 | 2810422J05Rik 27 kDa protein                                                       | 12.8  | 26.72 | 13 |
| 757 | IPI:IPI00230715.5 | Ndufa13 NADH dehydrogenase [ubiquinone] 1 alpha subcomplex subunit 13              | 12.78 | 40.28 | 8  |
| 758 | IPI:IPI00114416.1 | Dci 3,2-trans-enoyl-CoA isomerase, mitochondrial                                   | 12.76 | 29.41 | 8  |
| 759 | IPI:IPI00604967.3 | Rps2-ps6 Uncharacterized protein                                                   | 12.68 | 30.18 | 8  |
| 760 | IPI:IPI00666196.1 | LOC631033 similar to lysyl-tRNA synthetase isoform 1                               | 12.65 | 15.8  | 8  |
| 761 | IPI:IPI00402778.1 | Ntm Putative uncharacterized protein                                               | 12.65 | 25.87 | 7  |
| 762 | IPI:IPI00660820.1 | LOC633016 similar to Chromobox homolog 3 (HP1 gamma homolog, Drosophila) isoform 2 | 12.6  | 33.33 | 10 |

|     |                   |                                                                                            |       |       |     |
|-----|-------------------|--------------------------------------------------------------------------------------------|-------|-------|-----|
| 763 | IPI:IPI00466657.4 | Casq1 calsequestrin-1                                                                      | 12.58 | 27.16 | 8   |
| 764 | IPI:IPI00648853.4 | Tom1l2 Isoform 2 of TOM1-like protein 2                                                    | 12.44 | 22.38 | 7   |
| 765 | IPI:IPI00228253.2 | Acat2 Acetyl-CoA acetyltransferase, cytosolic                                              | 12.36 | 34.51 | 9   |
| 766 | IPI:IPI00626834.2 | Sh3glb2 Isoform 2 of Endophilin-B2                                                         | 12.36 | 27.75 | 7   |
| 767 | IPI:IPI00849847.1 | Gm3362 similar to ribosomal protein L23a                                                   | 12.29 | 33.33 | 7   |
| 768 | IPI:IPI00230751.3 | Ctnna2 Isoform 2 of Catenin alpha-2                                                        | 12.28 | 19.56 | 16  |
| 769 | IPI:IPI00267295.5 | Psmd1 26S proteasome non-ATPase regulatory subunit 1                                       | 12.28 | 11.65 | 8   |
| 770 | IPI:IPI00830743.1 | Srsf5 splicing factor, arginine/serine-rich 5                                              | 12.28 | 20.45 | 7   |
| 771 | IPI:IPI00462899.1 | Msi2 Isoform 2 of RNA-binding protein Musashi homolog 2                                    | 12.21 | 32.32 | 9   |
| 772 | IPI:IPI00880852.1 | Vamp2 Vesicle-associated membrane 2                                                        | 12.2  | 25.15 | 21  |
| 773 | IPI:IPI00114279.1 | Slc1a3 Excitatory amino acid transporter 1                                                 | 12.19 | 15.65 | 9   |
| 774 | IPI:IPI00622833.2 | Tpd52 Isoform 3 of Tumor protein D52                                                       | 12.15 | 40.7  | 7   |
| 775 | IPI:IPI00133708.1 | D1Pas1 Putative ATP-dependent RNA helicase PI10                                            | 12.12 | 16.21 | 11  |
| 776 | IPI:IPI00221456.1 | Sv2b Synaptic vesicle glycoprotein 2B                                                      | 12.11 | 9.956 | 9   |
| 777 | IPI:IPI00230660.5 | Rps15a 40S ribosomal protein S15a                                                          | 12.04 | 35.38 | 9   |
| 778 | IPI:IPI00606379.2 | Gm5786 hypothetical protein                                                                | 12.03 | 26.62 | 8   |
| 779 | IPI:IPI00760000.1 | Ywhab Isoform Short of 14-3-3 protein beta/alpha                                           | 12.03 | 66.8  | 39  |
| 780 | IPI:IPI00117352.1 | Tubb5 Tubulin beta-5 chain                                                                 | 12.01 | 77.48 | 228 |
| 781 | IPI:IPI00227773.1 | Ppp1cc Isoform Gamma-2 of Serine/threonine-protein phosphatase PP1-gamma catalytic subunit | 12.01 | 23.15 | 6   |
| 782 | IPI:IPI00775948.1 | Rpl7 Protein                                                                               | 11.79 | 21.86 | 9   |
| 783 | IPI:IPI00230682.6 | Ywhab Isoform Long of 14-3-3 protein beta/alpha                                            | 11.78 | 53.25 | 38  |
| 784 | IPI:IPI00420187.1 | Eps15l1 Isoform 3 of Epidermal growth factor receptor substrate 15-like 1                  | 11.76 | 18.92 | 9   |
| 785 | IPI:IPI00222560.7 | Eif4h Isoform Short of Eukaryotic translation initiation factor 4H                         | 11.72 | 30.7  | 8   |
| 786 | IPI:IPI00762269.1 | Snx12 Sorting nexin-12                                                                     | 11.69 | 32.73 | 8   |
| 787 | IPI:IPI00875096.1 | Krt2 71 kDa protein                                                                        | 11.6  | 7.133 | 6   |
| 788 | IPI:IPI00752501.2 | Slc4a10 Isoform 1 of Sodium-driven chloride bicarbonate exchanger                          | 11.57 | 6.708 | 8   |
| 789 | IPI:IPI00312058.5 | Cat Catalase                                                                               | 11.32 | 15.37 | 7   |
| 790 | IPI:IPI00403040.5 | Ldb3 LIM domain-binding protein 3 isoform c                                                | 11.26 | 15.17 | 6   |
| 791 | IPI:IPI00463909.3 | Huwe1 E3 ubiquitin-protein ligase HUWE1                                                    | 11.25 | 3.609 | 10  |
| 792 | IPI:IPI00650037.2 | Dnajc6 Isoform 2 of Putative tyrosine-protein phosphatase auxilin                          | 11.19 | 14.33 | 9   |
| 793 | IPI:IPI00877355.1 | Snx12 sorting nexin-12 isoform 1                                                           | 11.17 | 35.19 | 6   |
| 794 | IPI:IPI00944734.1 | Ctnna2 Isoform 3 of Catenin alpha-2                                                        | 11.05 | 16.78 | 13  |
| 795 | IPI:IPI00776341.2 | Cask Isoform 3 of Peripheral plasma membrane protein CASK                                  | 11.02 | 8.807 | 7   |
| 796 | IPI:IPI00177211.5 | Impg2 Isoform 2 of Interphotoreceptor matrix proteoglycan 2                                | 11.02 | 8.995 | 7   |



|     |                   |                                                                                   |       |       |    |
|-----|-------------------|-----------------------------------------------------------------------------------|-------|-------|----|
| 797 | IPI:IPI00127408.3 | Rac1 RAS-related C3 botulinum substrate 1, isoform CRA_a                          | 10.96 | 25.12 | 9  |
| 798 | IPI:IPI00742433.1 | Hnrnpul1 Isoform 2 of Heterogeneous nuclear ribonucleoprotein U-like protein 1    | 10.9  | 14.36 | 9  |
| 799 | IPI:IPI00970708.1 | Pcmt1 29 kDa protein                                                              | 10.86 | 35.06 | 8  |
| 800 | IPI:IPI00136169.1 | Pabpn1 Isoform 1 of Polyadenylate-binding protein 2                               | 10.82 | 38.74 | 8  |
| 801 | IPI:IPI00762081.1 | Rufy3 Isoform 2 of Protein RUFY3                                                  | 10.82 | 11.51 | 7  |
| 802 | IPI:IPI00749991.5 | Ptbp1 Polypyrimidine tract-binding protein 1                                      | 10.81 | 30.74 | 9  |
| 803 | IPI:IPI00889887.1 | Dct L-dopachrome tautomerase precursor                                            | 10.8  | 12.96 | 6  |
| 804 | IPI:IPI00881225.1 | Tpd52 Uncharacterized protein                                                     | 10.74 | 34.47 | 9  |
| 805 | IPI:IPI00227302.6 | Slc4a10 Solute carrier family 4, sodium bicarbonate cotransporter-like, member 10 | 10.74 | 6.781 | 8  |
| 806 | IPI:IPI00752419.3 | Tln2 Tln2 protein                                                                 | 10.71 | 5.462 | 8  |
| 807 | IPI:IPI00776047.1 | Aifm1 Apoptosis-inducing factor, mitochondrion-associated 1                       | 10.59 | 17.76 | 8  |
| 808 | IPI:IPI00124742.3 | Eif4h Isoform Long of Eukaryotic translation initiation factor 4H                 | 10.51 | 32.26 | 7  |
| 809 | IPI:IPI00798492.2 | Krt10 Isoform 1 of Keratin, type I cytoskeletal 10                                | 10.49 | 16.14 | 11 |
| 810 | IPI:IPI00653566.1 | Acot2 acyl-coenzyme A thioesterase 2, mitochondrial precursor                     | 10.46 | 18.1  | 5  |
| 811 | IPI:IPI00133006.1 | Ndufab1 Acyl carrier protein, mitochondrial                                       | 10.43 | 33.97 | 10 |
| 812 | IPI:IPI00857485.1 | Pafah1b3 Uncharacterized protein                                                  | 10.3  | 43.33 | 8  |
| 813 | IPI:IPI00230588.1 | Acot7 Isoform C of Cytosolic acyl coenzyme A thioester hydrolase                  | 10.3  | 20.29 | 5  |
| 814 | IPI:IPI00475154.1 | Rpn2 Dolichyl-diphosphooligosaccharide--protein glycosyltransferase subunit 2     | 10.25 | 14.74 | 5  |
| 815 | IPI:IPI00463344.5 | Dnajc8 Uncharacterized protein                                                    | 10.15 | 27.65 | 5  |
| 816 | IPI:IPI00265239.1 | LOC100045925;Gm10108 similar to cytochrome c                                      | 10.07 | 41.9  | 7  |
| 817 | IPI:IPI00828628.2 | Rps8 40S ribosomal protein S8                                                     | 10.05 | 28.37 | 6  |
| 818 | IPI:IPI00649391.2 | Stoml2 Stomatolysin (Epb7.2)-like 2                                               | 10.04 | 29.97 | 5  |
| 819 | IPI:IPI00648539.2 | Dnajc8 DnaJ (Hsp40) homolog, subfamily C, member 8                                | 10.04 | 25.4  | 5  |
| 820 | IPI:IPI00649778.1 | Camk2b Calcium/calmodulin-dependent protein kinase II, beta, isoform CRA_b        | 10    | 21.62 | 14 |
| 821 | IPI:IPI00857267.1 | Cacna2d2 Isoform 3 of Voltage-dependent calcium channel subunit alpha-2/delta-2   | 10    | 5.45  | 5  |
| 822 | IPI:IPI00404837.3 | Myh4 Myosin-4                                                                     | 9.99  | 5.776 | 7  |
| 823 | IPI:IPI00132942.1 | Nudc Nuclear migration protein nudC                                               | 9.98  | 31.02 | 9  |
| 824 | IPI:IPI00122350.4 | Snrpa U1 small nuclear ribonucleoprotein A                                        | 9.98  | 34.49 | 9  |
| 825 | IPI:IPI00621548.2 | Por NADPH--cytochrome P450 reductase                                              | 9.97  | 19.32 | 9  |
| 826 | IPI:IPI00329927.4 | Nfasc Neurofascin                                                                 | 9.96  | 6.935 | 8  |
| 827 | IPI:IPI00128760.1 | Ube2l3 Ubiquitin-conjugating enzyme E2 L3                                         | 9.96  | 57.79 | 8  |
| 828 | IPI:IPI00315488.1 | Rars Arginyl-tRNA synthetase, cytoplasmic                                         | 9.95  | 13.33 | 8  |

|     |                   |                                                                             |      |       |   |
|-----|-------------------|-----------------------------------------------------------------------------|------|-------|---|
| 829 | IPI:IPI00480507.1 | Prpf19 Isoform 1 of Pre-mRNA-processing factor 19                           | 9.94 | 31.15 | 9 |
| 830 | IPI:IPI00652811.1 | Anxa1 Putative uncharacterized protein                                      | 9.94 | 21.69 | 7 |
| 831 | IPI:IPI00228059.4 | Pgm2l1 Glucose 1,6-bisphosphate synthase                                    | 9.93 | 13.53 | 9 |
| 832 | IPI:IPI00223757.4 | Akr1b3 Aldose reductase                                                     | 9.93 | 21.52 | 9 |
| 833 | IPI:IPI00109860.3 | Rbm8a Isoform 2 of RNA-binding protein 8A                                   | 9.92 | 45.09 | 6 |
| 834 | IPI:IPI00775913.1 | Apoa4 apolipoprotein A-IV precursor                                         | 9.9  | 25.57 | 8 |
| 835 | IPI:IPI00625588.1 | Gm9755 Elongation factor Tu                                                 | 9.9  | 13.5  | 5 |
| 836 | IPI:IPI00551236.3 | Stmn1 Stathmin                                                              | 9.9  | 43.14 | 8 |
| 837 | IPI:IPI00109311.3 | Slc9a3r1 Isoform 1 of Na(+)/H(+) exchange regulatory cofactor NHE-RF1       | 9.89 | 27.89 | 9 |
| 838 | IPI:IPI00224109.2 | Hsph1 Isoform HSP105-beta of Heat shock protein 105 kDa                     | 9.89 | 13.02 | 9 |
| 839 | IPI:IPI00123190.1 | Adssl1 Isoform 1 of Adenylosuccinate synthetase isozyme 1                   | 9.89 | 16.85 | 7 |
| 840 | IPI:IPI00757611.1 | Dnajc8 DnaJ homolog subfamily C member 8                                    | 9.89 | 32.02 | 5 |
| 841 | IPI:IPI00225306.2 | Slc4a7 Isoform 1 of Sodium bicarbonate cotransporter 3                      | 9.88 | 7.737 | 6 |
| 842 | IPI:IPI00230011.3 | Rab6 Isoform 2 of Ras-related protein Rab-6A                                | 9.88 | 37.02 | 7 |
| 843 | IPI:IPI00474430.1 | Srsf2 Putative uncharacterized protein                                      | 9.86 | 25.59 | 8 |
| 844 | IPI:IPI00661414.2 | Arpc2 Actin-related protein 2/3 complex subunit 2                           | 9.85 | 26    | 7 |
| 845 | IPI:IPI00454001.4 | Sarm1 Isoform 3 of Sterile alpha and TIR motif-containing protein 1         | 9.85 | 10.99 | 6 |
| 846 | IPI:IPI00126072.2 | Vat1 Synaptic vesicle membrane protein VAT-1 homolog                        | 9.85 | 21.67 | 8 |
| 847 | IPI:IPI00830393.1 | Cops6 Uncharacterized protein                                               | 9.85 | 25.93 | 5 |
| 848 | IPI:IPI00267855.4 | Gripap1 GRIP1-associated protein 1                                          | 9.85 | 7.692 | 5 |
| 849 | IPI:IPI00890001.1 | Psma2 Proteasome subunit alpha type-2                                       | 9.84 | 38.46 | 8 |
| 850 | IPI:IPI00225390.5 | Cox6b1 Cytochrome c oxidase subunit 6B1                                     | 9.84 | 61.63 | 9 |
| 851 | IPI:IPI00221566.3 | Htatsf1 Isoform 1 of HIV Tat-specific factor 1 homolog                      | 9.84 | 11.36 | 8 |
| 852 | IPI:IPI00111501.1 | Cplx2 Complexin-2                                                           | 9.84 | 48.51 | 9 |
| 853 | IPI:IPI00125091.1 | Lasp1 LIM and SH3 domain protein 1                                          | 9.84 | 22.43 | 6 |
| 854 | IPI:IPI00230113.5 | Cyb5 Cytochrome b5                                                          | 9.84 | 47.76 | 5 |
| 855 | IPI:IPI00890139.1 | Eps15l1 epidermal growth factor receptor substrate 15-like 1 isoform a      | 9.84 | 12.68 | 6 |
| 856 | IPI:IPI00930846.1 | Tcea1 transcription elongation factor A protein 1 isoform 3                 | 9.84 | 29.67 | 7 |
| 857 | IPI:IPI00849927.1 | Rpl10a;Rpl10a-ps1 60S ribosomal protein L10a                                | 9.83 | 23.96 | 8 |
| 858 | IPI:IPI00757771.1 | Nptn Isoform 2 of Neuroplastin                                              | 9.82 | 18.89 | 7 |
| 859 | IPI:IPI00170093.3 | Ndufs8 NADH dehydrogenase [ubiquinone] iron-sulfur protein 8, mitochondrial | 9.82 | 20.28 | 7 |
| 860 | IPI:IPI00109275.1 | Slc25a22 Mitochondrial glutamate carrier 1                                  | 9.81 | 29.41 | 9 |
| 861 | IPI:IPI00113746.3 | U2af2 Splicing factor U2AF 65 kDa subunit                                   | 9.8  | 29.26 | 9 |

|     |                   |                                                                        |      |       |     |
|-----|-------------------|------------------------------------------------------------------------|------|-------|-----|
| 862 | IPI:IPI00848900.1 | Gm12034 similar to ribosomal protein S17                               | 9.8  | 48.55 | 9   |
| 863 | IPI:IPI00118819.1 | Pafah1b3 Platelet-activating factor acetylhydrolase IB subunit gamma   | 9.8  | 33.62 | 8   |
| 864 | IPI:IPI00672508.1 | Acot7 Isoform D of Cytosolic acyl coenzyme A thioester hydrolase       | 9.8  | 19.79 | 6   |
| 865 | IPI:IPI00653921.2 | Rdx radixin isoform a                                                  | 9.8  | 19.21 | 14  |
| 866 | IPI:IPI00750657.1 | LOC100045439 similar to testis-specific adriamycin sensitivity protein | 9.8  | 22.56 | 5   |
| 867 | IPI:IPI00321718.4 | Phb2 Prohibitin-2                                                      | 9.79 | 35.12 | 9   |
| 868 | IPI:IPI00875723.1 | Camk2b 68 kDa protein                                                  | 9.79 | 28.06 | 18  |
| 869 | IPI:IPI00126716.3 | Eif4a3 Eukaryotic initiation factor 4A-III                             | 9.79 | 31.39 | 13  |
| 870 | IPI:IPI00119111.2 | Cnn3 Calponin-3                                                        | 9.78 | 34.85 | 9   |
| 871 | IPI:IPI00554868.2 | Prps1 Ribose-phosphate pyrophosphokinase 1                             | 9.78 | 23.9  | 6   |
| 872 | IPI:IPI00226872.1 | Efh2 Putative uncharacterized protein                                  | 9.77 | 29.58 | 7   |
| 873 | IPI:IPI00230706.5 | Pgam2 Phosphoglycerate mutase 2                                        | 9.77 | 69.17 | 28  |
| 874 | IPI:IPI00117350.1 | Tuba4a Tubulin alpha-4A chain                                          | 9.77 | 64.96 | 142 |
| 875 | IPI:IPI00469307.2 | Lrpap1 Alpha-2-macroglobulin receptor-associated protein               | 9.76 | 26.67 | 8   |
| 876 | IPI:IPI00127930.1 | Gnb5 Isoform 1 of Guanine nucleotide-binding protein subunit beta-5    | 9.76 | 20.51 | 7   |
| 877 | IPI:IPI00331692.1 | Dci 3,2-trans-enoyl-CoA isomerase, mitochondrial precursor             | 9.76 | 20.76 | 6   |
| 878 | IPI:IPI00137831.1 | Rcn1 Reticulocalbin-1                                                  | 9.75 | 28.92 | 8   |
| 879 | IPI:IPI00132093.1 | Pin1 Peptidyl-prolyl cis-trans isomerase NIMA-interacting 1            | 9.75 | 53.33 | 7   |
| 880 | IPI:IPI00454016.5 | Mat2a S-adenosylmethionine synthase isoform type-2                     | 9.73 | 17.47 | 6   |
| 881 | IPI:IPI00648915.1 | Aarsd1 Alanyl-tRNA synthetase domain containing 1                      | 9.72 | 13.52 | 5   |
| 882 | IPI:IPI00230193.7 | Gnaz Guanine nucleotide-binding protein G(z) subunit alpha             | 9.71 | 27.32 | 8   |
| 883 | IPI:IPI00798527.1 | Tnpo1 Isoform 2 of Transportin-1                                       | 9.69 | 10.22 | 9   |
| 884 | IPI:IPI00135686.2 | Ppib Peptidyl-prolyl cis-trans isomerase B                             | 9.69 | 28.24 | 6   |
| 885 | IPI:IPI00283761.1 | Sfxn5 Putative uncharacterized protein                                 | 9.68 | 29.47 | 7   |
| 886 | IPI:IPI00678003.1 | Itpa Inosine triphosphate pyrophosphatase                              | 9.67 | 38.38 | 5   |
| 887 | IPI:IPI00226727.4 | Dlg2 Isoform 2 of Disks large homolog 2                                | 9.67 | 13.91 | 9   |
| 888 | IPI:IPI00331327.3 | Hars histidyl-tRNA synthetase, cytoplasmic                             | 9.67 | 15.52 | 6   |
| 889 | IPI:IPI00153950.1 | Prpsap2 Phosphoribosyl pyrophosphate synthase-associated protein 2     | 9.64 | 30.08 | 8   |
| 890 | IPI:IPI00221998.4 | 2310001A20Rik Adipocyte plasma membrane-associated protein             | 9.64 | 19.28 | 5   |
| 891 | IPI:IPI00473680.2 | Tmed9 Putative uncharacterized protein                                 | 9.64 | 26.77 | 7   |
| 892 | IPI:IPI00269408.1 | Snap47 Isoform 1 of Synaptosomal-associated protein 47                 | 9.64 | 17.43 | 5   |

|     |                   |                                                                            |      |       |   |
|-----|-------------------|----------------------------------------------------------------------------|------|-------|---|
| 893 | IPI:IPI00154047.1 | Hibch 3-hydroxyisobutyryl-CoA hydrolase, mitochondrial                     | 9.64 | 20.78 | 7 |
| 894 | IPI:IPI00321266.5 | Pspc1 Isoform 1 of Paraspeckle component 1                                 | 9.63 | 14.53 | 6 |
| 895 | IPI:IPI00170008.1 | Snrpa1 U2 small nuclear ribonucleoprotein A'                               | 9.63 | 25.1  | 6 |
| 896 | IPI:IPI00928007.1 | Myo5a Uncharacterized protein                                              | 9.62 | 5.142 | 8 |
| 897 | IPI:IPI00109823.5 | Gbe1 1,4-alpha-glucan-branching enzyme                                     | 9.62 | 12.54 | 7 |
| 898 | IPI:IPI00108454.2 | Rps6-ps1 Uncharacterized protein                                           | 9.62 | 23.69 | 9 |
| 899 | IPI:IPI00134058.3 | Erp44 Endoplasmic reticulum resident protein 44                            | 9.62 | 23.4  | 7 |
| 900 | IPI:IPI00320462.4 | Bph1 Putative uncharacterized protein                                      | 9.61 | 21.4  | 5 |
| 901 | IPI:IPI00320208.3 | Eef1b2 Elongation factor 1-beta                                            | 9.61 | 28.44 | 9 |
| 902 | IPI:IPI00323644.4 | Gart Isoform Long of Trifunctional purine biosynthetic protein adenosine-3 | 9.6  | 10.69 | 7 |
| 903 | IPI:IPI00387245.1 | Apeh Isoform 1 of Acylamino-acid-releasing enzyme                          | 9.6  | 9.836 | 5 |
| 904 | IPI:IPI00122265.1 | Sh3bgr1 SH3 domain-binding glutamic acid-rich-like protein                 | 9.6  | 58.77 | 5 |
| 905 | IPI:IPI00111149.1 | Adprh [Protein ADP-ribosylarginine] hydrolase                              | 9.59 | 22.65 | 9 |
| 906 | IPI:IPI00112555.3 | Gars Glycyl-tRNA synthetase                                                | 9.58 | 10.15 | 8 |
| 907 | IPI:IPI00115833.2 | Mtap6 Isoform 1 of Microtubule-associated protein 6                        | 9.58 | 11.26 | 6 |
| 908 | IPI:IPI00880213.1 | Gm15427 ribosomal protein L18A family member                               | 9.57 | 21.47 | 5 |
| 909 | IPI:IPI00123223.2 | Mug1 Murinoglobulin-1                                                      | 9.57 | 7.385 | 9 |
| 910 | IPI:IPI00323800.6 | Nefm Neurofilament medium polypeptide                                      | 9.56 | 11.08 | 8 |
| 911 | IPI:IPI00121288.5 | Ndufb10 NADH dehydrogenase [ubiquinone] 1 beta subcomplex subunit 10       | 9.55 | 38.64 | 6 |
| 912 | IPI:IPI00123518.1 | Lypla2 Acyl-protein thioesterase 2                                         | 9.54 | 44.59 | 9 |
| 913 | IPI:IPI00410886.2 | Luc7l2 putative RNA-binding protein Luc7-like 2 isoform 2                  | 9.54 | 17.54 | 8 |
| 914 | IPI:IPI00122486.3 | Camkv CaM kinase-like vesicle-associated protein                           | 9.54 | 15.23 | 7 |
| 915 | IPI:IPI00881287.1 | Fkbp8 Isoform 2 of Peptidyl-prolyl cis-trans isomerase FKBP8               | 9.54 | 20.35 | 5 |
| 916 | IPI:IPI00755495.2 | Gm12034 similar to ribosomal protein S17                                   | 9.54 | 48.55 | 6 |
| 917 | IPI:IPI00751759.1 | Ptbp2 Isoform 1 of Polypyrimidine tract-binding protein 2                  | 9.52 | 24.86 | 9 |
| 918 | IPI:IPI00122974.1 | Gpm6a Neuronal membrane glycoprotein M6-a                                  | 9.52 | 20.14 | 7 |
| 919 | IPI:IPI00311369.1 | Uchl3 Ubiquitin carboxyl-terminal hydrolase isozyme L3                     | 9.52 | 36.09 | 7 |
| 920 | IPI:IPI00453622.2 | Uba3 NEDD8-activating enzyme E1 catalytic subunit isoform 1                | 9.52 | 11.04 | 6 |
| 921 | IPI:IPI00929837.1 | Hgs hepatocyte growth factor-regulated tyrosine kinase substrate isoform 1 | 9.52 | 10.04 | 7 |
| 922 | IPI:IPI00126501.1 | Car14 Carbonic anhydrase 14                                                | 9.51 | 28.19 | 8 |
| 923 | IPI:IPI00111770.7 | Atp5k ATP synthase subunit e, mitochondrial                                | 9.51 | 69.01 | 7 |
| 924 | IPI:IPI00463193.2 | Gm5938 Novel protein similar to odorant binding                            | 9.51 | 55.21 | 9 |

|     |                   |                                                                                                                       |      |       |    |
|-----|-------------------|-----------------------------------------------------------------------------------------------------------------------|------|-------|----|
|     |                   | protein Ia Obp1a                                                                                                      |      |       |    |
| 925 | IPI:IPI00410819.3 | Ddost Putative uncharacterized protein                                                                                | 9.51 | 14.51 | 6  |
| 926 | IPI:IPI00124245.1 | G3bp2 Isoform A of Ras GTPase-activating protein-binding protein 2                                                    | 9.5  | 19.92 | 8  |
| 927 | IPI:IPI00114801.2 | Inpp1 Inositol polyphosphate 1-phosphatase                                                                            | 9.5  | 21.97 | 8  |
| 928 | IPI:IPI00137758.5 | Scrn3 Secernin-3                                                                                                      | 9.49 | 17.46 | 7  |
| 929 | IPI:IPI00622704.3 | 2310035C23Rik Isoform 2 of LisH domain and HEAT repeat-containing protein KIAA1468                                    | 9.49 | 6.46  | 5  |
| 930 | IPI:IPI00126083.3 | Ehd1 EH domain-containing protein 1                                                                                   | 9.47 | 15.54 | 7  |
| 931 | IPI:IPI00555113.2 | Rpl18 60S ribosomal protein L18                                                                                       | 9.47 | 27.66 | 6  |
| 932 | IPI:IPI00311493.5 | Krt18 Keratin, type I cytoskeletal 18                                                                                 | 9.47 | 11.58 | 5  |
| 933 | IPI:IPI00475378.4 | Ptbp1 polypyrimidine tract-binding protein 1 isoform 1                                                                | 9.46 | 29.19 | 9  |
| 934 | IPI:IPI00125929.2 | Ndufa4 NADH dehydrogenase [ubiquinone] 1 alpha subcomplex subunit 4                                                   | 9.46 | 56.1  | 8  |
| 935 | IPI:IPI00284444.5 | Cdc5l Cell division cycle 5-related protein                                                                           | 9.46 | 9.601 | 5  |
| 936 | IPI:IPI00230124.5 | Fabp3 Fatty acid-binding protein, heart                                                                               | 9.45 | 48.12 | 9  |
| 937 | IPI:IPI00881629.1 | Vps29 Uncharacterized protein                                                                                         | 9.45 | 38.89 | 5  |
| 938 | IPI:IPI00115117.1 | Stoml2 Stomatin-like protein 2                                                                                        | 9.45 | 32.29 | 7  |
| 939 | IPI:IPI00407954.2 | Rap1b;LOC100048397 Ras-related protein Rap-1b                                                                         | 9.44 | 44.02 | 9  |
| 940 | IPI:IPI00132734.1 | Dynll2 Dynein light chain 2, cytoplasmic                                                                              | 9.44 | 56.18 | 9  |
| 941 | IPI:IPI00407909.1 | Gm5580 similar to Chain C, Structure Of The Human Exon Junction Complex With A Trapped Dead-Box Helicase Bound To Rna | 9.44 | 26.28 | 8  |
| 942 | IPI:IPI00108143.1 | Hnrnp2 Heterogeneous nuclear ribonucleoprotein H2                                                                     | 9.43 | 40.76 | 24 |
| 943 | IPI:IPI00117087.1 | Cdc37 Hsp90 co-chaperone Cdc37                                                                                        | 9.42 | 25.07 | 7  |
| 944 | IPI:IPI00131204.1 | Ugp2 Isoform 1 of UTP--glucose-1-phosphate uridylyltransferase                                                        | 9.42 | 18.7  | 9  |
| 945 | IPI:IPI00129466.1 | LOC100047028;Cbx1 Chromobox protein homolog 1                                                                         | 9.42 | 38.38 | 9  |
| 946 | IPI:IPI00314316.3 | Mpp6 Isoform Alpha of MAGUK p55 subfamily member 6                                                                    | 9.41 | 17.25 | 9  |
| 947 | IPI:IPI00224505.7 | Rpl13;Gm15710;Gm12918 60S ribosomal protein L13                                                                       | 9.41 | 22.75 | 6  |
| 948 | IPI:IPI00407944.2 | Epn1 Isoform 1 of Epsin-1                                                                                             | 9.41 | 14.78 | 6  |
| 949 | IPI:IPI00624501.2 | Asna1 ATPase Asna1                                                                                                    | 9.4  | 26.72 | 8  |
| 950 | IPI:IPI00321617.1 | Ephx2 Isoform 1 of Epoxide hydrolase 2                                                                                | 9.39 | 18.77 | 8  |
| 951 | IPI:IPI00473728.1 | Rpl14 Putative uncharacterized protein                                                                                | 9.39 | 24.23 | 6  |
| 952 | IPI:IPI00869393.1 | Cat catalase                                                                                                          | 9.38 | 20.49 | 9  |
| 953 | IPI:IPI00118930.1 | Napa Alpha-soluble NSF attachment protein                                                                             | 9.37 | 27.12 | 8  |
| 954 | IPI:IPI00131224.1 | Tceb2 Transcription elongation factor B polypeptide 2                                                                 | 9.37 | 66.95 | 7  |
| 955 | IPI:IPI00125266.1 | Asah1 Acid ceramidase                                                                                                 | 9.37 | 17.51 | 6  |

|     |                   |                                                                                       |      |       |    |
|-----|-------------------|---------------------------------------------------------------------------------------|------|-------|----|
| 956 | IPI:IPI00133185.3 | Rpl14 60S ribosomal protein L14                                                       | 9.37 | 25.35 | 5  |
| 957 | IPI:IPI00885560.1 | Hnrnp3 Uncharacterized protein                                                        | 9.36 | 40.48 | 15 |
| 958 | IPI:IPI00461286.1 | Ppm1e Protein phosphatase 1E                                                          | 9.35 | 12.55 | 7  |
| 959 | IPI:IPI00129685.3 | Tpt1;Gm14456 Translationally-controlled tumor protein                                 | 9.35 | 54.65 | 8  |
| 960 | IPI:IPI00459279.2 | Qdpr Dihydropteridine reductase                                                       | 9.33 | 37.76 | 7  |
| 961 | IPI:IPI00119063.2 | Lrp1 Prolow-density lipoprotein receptor-related protein 1                            | 9.33 | 2.706 | 8  |
| 962 | IPI:IPI00848593.1 | LOC100045659 similar to hCG1640785                                                    | 9.33 | 33.94 | 5  |
| 963 | IPI:IPI00312172.5 | Vps4a Vacuolar protein sorting-associated protein 4A                                  | 9.32 | 17.16 | 6  |
| 964 | IPI:IPI00128346.1 | Cisd1 CDGSH iron-sulfur domain-containing protein 1                                   | 9.32 | 44.44 | 7  |
| 965 | IPI:IPI00308938.6 | Capn2 Calpain-2 catalytic subunit                                                     | 9.32 | 9.857 | 5  |
| 966 | IPI:IPI00555118.4 | Slc4a10 Isoform 2 of Sodium-driven chloride bicarbonate exchanger                     | 9.31 | 5.882 | 7  |
| 967 | IPI:IPI00133706.1 | Rab1b Ras-related protein Rab-1B                                                      | 9.31 | 53.73 | 22 |
| 968 | IPI:IPI00624663.3 | Pzp Uncharacterized protein                                                           | 9.31 | 8.427 | 8  |
| 969 | IPI:IPI00132575.3 | Cotl1 Coactosin-like protein                                                          | 9.3  | 51.41 | 7  |
| 970 | IPI:IPI00807833.2 | Madd Isoform 3 of MAP kinase-activating death domain protein                          | 9.3  | 6.354 | 9  |
| 971 | IPI:IPI00968372.1 | Gps1 COP9 signalosome complex subunit 1 isoform 2                                     | 9.3  | 15.61 | 8  |
| 972 | IPI:IPI00139994.1 | Nup62 Nuclear pore glycoprotein p62                                                   | 9.3  | 18.44 | 6  |
| 973 | IPI:IPI00111315.1 | Apoa2 Apolipoprotein A-II                                                             | 9.29 | 63.73 | 9  |
| 974 | IPI:IPI00137194.1 | Slc16a1 Monocarboxylate transporter 1                                                 | 9.29 | 13.39 | 5  |
| 975 | IPI:IPI00113536.3 | Anp32b Isoform 2 of Acidic leucine-rich nuclear phosphoprotein 32 family member B     | 9.28 | 26.14 | 15 |
| 976 | IPI:IPI00131845.1 | Psma6 Proteasome subunit alpha type-6                                                 | 9.28 | 32.11 | 7  |
| 977 | IPI:IPI00410858.2 | Pabpn1 Isoform 2 of Polyadenylate-binding protein 2                                   | 9.28 | 35.96 | 7  |
| 978 | IPI:IPI00461964.3 | Aldh6a1 Methylmalonate-semialdehyde dehydrogenase [acylating], mitochondrial          | 9.27 | 26.73 | 9  |
| 979 | IPI:IPI00121218.5 | Fahd2a Fumarylacetoacetate hydrolase domain-containing protein 2A                     | 9.27 | 34.19 | 6  |
| 980 | IPI:IPI00130353.5 | Vars Valyl-tRNA synthetase                                                            | 9.27 | 6.334 | 5  |
| 981 | IPI:IPI00759967.1 | B020018G12Rik hypothetical protein LOC545388                                          | 9.27 | 44.83 | 6  |
| 982 | IPI:IPI00465788.4 | Sgip1 Isoform 1 of SH3-containing GRB2-like protein 3-interacting protein 1           | 9.26 | 10.42 | 5  |
| 983 | IPI:IPI00880411.1 | Tfg Trk-fused gene                                                                    | 9.25 | 32.24 | 9  |
| 984 | IPI:IPI00121949.1 | Lancl2 LanC-like protein 2                                                            | 9.25 | 19.56 | 5  |
| 985 | IPI:IPI00133562.1 | Chchd3 Coiled-coil-helix-coiled-coil-helix domain-containing protein 3, mitochondrial | 9.25 | 24.23 | 6  |
| 986 | IPI:IPI00133284.1 | D10Jhu81e;LOC100046684 ES1 protein homolog, mitochondrial                             | 9.23 | 50.38 | 17 |

|      |                   |                                                                             |      |       |     |
|------|-------------------|-----------------------------------------------------------------------------|------|-------|-----|
| 987  | IPI:IPI00229534.5 | Marcks Myristoylated alanine-rich C-kinase substrate                        | 9.23 | 44.01 | 7   |
| 988  | IPI:IPI00421223.3 | Tpm4 Tropomyosin alpha-4 chain                                              | 9.22 | 31.85 | 7   |
| 989  | IPI:IPI00223372.2 | Rbm39 RNA binding motif protein 39                                          | 9.22 | 15.46 | 8   |
| 990  | IPI:IPI00224219.1 | Scfd1 Isoform 1 of Sec1 family domain-containing protein 1                  | 9.22 | 13.3  | 5   |
| 991  | IPI:IPI00943394.1 | Rtcd1 RNA 3'-terminal phosphate cyclase                                     | 9.22 | 17.21 | 5   |
| 992  | IPI:IPI00123058.1 | Cntn1 Contactin-1                                                           | 9.21 | 8.137 | 5   |
| 993  | IPI:IPI00876257.1 | Clta 26 kDa protein                                                         | 9.2  | 20.51 | 8   |
| 994  | IPI:IPI00126048.2 | Psmd13 26S proteasome non-ATPase regulatory subunit 13                      | 9.2  | 17.55 | 6   |
| 995  | IPI:IPI00119219.2 | Hsd17b12 Isoform 1 of Estradiol 17-beta-dehydrogenase 12                    | 9.2  | 17.95 | 6   |
| 996  | IPI:IPI00338880.3 | Nrcam Isoform 2 of Neuronal cell adhesion molecule                          | 9.19 | 9.781 | 7   |
| 997  | IPI:IPI00121013.1 | Pea15a Isoform 1 of Astrocytic phosphoprotein PEA-15                        | 9.19 | 48.46 | 9   |
| 998  | IPI:IPI00129577.1 | Aifm1 Apoptosis-inducing factor 1, mitochondrial                            | 9.19 | 17.65 | 8   |
| 999  | IPI:IPI00314950.2 | Rplp0 60S acidic ribosomal protein P0                                       | 9.19 | 29.34 | 6   |
| 1000 | IPI:IPI00131870.3 | Cops3 COP9 signalosome complex subunit 3                                    | 9.18 | 22.93 | 7   |
| 1001 | IPI:IPI00115454.3 | Sfxn1 Sideroflexin-1                                                        | 9.17 | 25.78 | 7   |
| 1002 | IPI:IPI00354363.3 | Rpl7a-ps10 Uncharacterized protein                                          | 9.16 | 20.68 | 7   |
| 1003 | IPI:IPI00122392.1 | Myg1 UPF0160 protein MYG1, mitochondrial                                    | 9.14 | 20    | 5   |
| 1004 | IPI:IPI00758106.1 | Gm7808 similar to ubiquitin A-52 residue ribosomal protein fusion product 1 | 9.14 | 48.44 | 13  |
| 1005 | IPI:IPI00466581.4 | Sgip1 Gag protein                                                           | 9.13 | 16.55 | 7   |
| 1006 | IPI:IPI00453499.3 | Iars2 Isoleucyl-tRNA synthetase, mitochondrial                              | 9.13 | 9.387 | 9   |
| 1007 | IPI:IPI00113134.1 | Skiv2l2 Superkiller viralicidic activity 2-like 2                           | 9.13 | 7.115 | 6   |
| 1008 | IPI:IPI00395193.1 | Rtn1 Reticulon-1                                                            | 9.11 | 11.54 | 8   |
| 1009 | IPI:IPI00224518.2 | Rab5c Ras-related protein Rab-5C                                            | 9.11 | 48.15 | 7   |
| 1010 | IPI:IPI00225533.1 | Necap1 Adaptin ear-binding coat-associated protein 1                        | 9.11 | 26.55 | 6   |
| 1011 | IPI:IPI00911151.1 | Nucb2 nucleobindin-2 isoform 2                                              | 9.11 | 14.05 | 5   |
| 1012 | IPI:IPI00319965.3 | Psmd6 26S proteasome non-ATPase regulatory subunit 6                        | 9.11 | 12.34 | 6   |
| 1013 | IPI:IPI00469531.3 | Myl1 Isoform MLC3 of Myosin light chain 1/3, skeletal muscle isoform        | 9.1  | 48.67 | 6   |
| 1014 | IPI:IPI00754418.1 | Api5 Apoptosis inhibitor 5                                                  | 9.1  | 16.47 | 6   |
| 1015 | IPI:IPI00608077.3 | Myh14 Isoform 2 of Myosin-14                                                | 9.09 | 12.15 | 18  |
| 1016 | IPI:IPI00109073.5 | Tubb4 Tubulin beta-4 chain                                                  | 9.09 | 75.68 | 202 |
| 1017 | IPI:IPI00119667.1 | Eef1a2 Elongation factor 1-alpha 2                                          | 9.09 | 39.31 | 26  |
| 1018 | IPI:IPI00133110.1 | Txndc12 Thioredoxin domain-containing protein 12                            | 9.09 | 36.47 | 6   |
| 1019 | IPI:IPI00221831.1 | Slc32a1 Isoform 2 of Vesicular inhibitory amino                             | 9.09 | 13.44 | 8   |

|      |                   |                                                                                                   |      |       |    |
|------|-------------------|---------------------------------------------------------------------------------------------------|------|-------|----|
|      |                   | acid transporter                                                                                  |      |       |    |
| 1020 | IPI:IPI00131176.1 | mt-Co2 Cytochrome c oxidase subunit 2                                                             | 9.09 | 20.7  | 9  |
| 1021 | IPI:IPI00132194.3 | Aimp1 aminoacyl tRNA synthetase complex-interacting multifunctional protein 1                     | 9.08 | 38.24 | 9  |
| 1022 | IPI:IPI00316479.7 | Ptpn11 Isoform 2 of Tyrosine-protein phosphatase non-receptor type 11                             | 9.08 | 17.37 | 8  |
| 1023 | IPI:IPI00408909.4 | Mtap1a Isoform 1 of Microtubule-associated protein 1A                                             | 9.08 | 3.927 | 8  |
| 1024 | IPI:IPI00124973.1 | Kpna2;Gm10184;Gm10259 Importin subunit alpha-2                                                    | 9.08 | 14.93 | 5  |
| 1025 | IPI:IPI00315452.5 | Pnp Purine nucleoside phosphorylase                                                               | 9.08 | 31.83 | 6  |
| 1026 | IPI:IPI00137787.3 | Rpl8 60S ribosomal protein L8                                                                     | 9.08 | 23.74 | 5  |
| 1027 | IPI:IPI00125960.1 | Ndrp1 Protein NDRG1                                                                               | 9.07 | 21.83 | 9  |
| 1028 | IPI:IPI00228618.5 | Gnaq Guanine nucleotide-binding protein G(q) subunit alpha                                        | 9.07 | 22.56 | 8  |
| 1029 | IPI:IPI00131211.1 | Cnga1 cGMP-gated cation channel alpha-1                                                           | 9.06 | 11.11 | 8  |
| 1030 | IPI:IPI00463891.1 | Gnas Isoform Gnas-2 of Guanine nucleotide-binding protein G(s) subunit alpha isoforms short       | 9.06 | 31.58 | 19 |
| 1031 | IPI:IPI00278804.1 | Scamp1 Secretory carrier-associated membrane protein 1                                            | 9.04 | 26.63 | 6  |
| 1032 | IPI:IPI00111876.2 | Abhd14b Abhydrolase domain-containing protein 14B                                                 | 9.04 | 37.14 | 8  |
| 1033 | IPI:IPI00282848.1 | Hist1h3c;Hist2h3c1;Hist1h3f;Hist1h3b;Hist1h3e;Hist2h3c2-ps;Hist2h3b;Hist1h3d histone H3.2         | 9.04 | 30.15 | 5  |
| 1034 | IPI:IPI00132531.1 | Ndufb5 NADH dehydrogenase [ubiquinone] 1 beta subcomplex subunit 5, mitochondrial                 | 9.04 | 21.69 | 5  |
| 1035 | IPI:IPI00136936.1 | Vps29 Isoform 1 of Vacuolar protein sorting-associated protein 29                                 | 9.04 | 25.82 | 6  |
| 1036 | IPI:IPI00845528.1 | Ogt Isoform 2 of UDP-N-acetylglucosamine--peptide N-acetylglucosaminyltransferase 110 kDa subunit | 9.03 | 10.23 | 7  |
| 1037 | IPI:IPI00121341.1 | Tmx1 Thioredoxin-related transmembrane protein 1                                                  | 9.03 | 12.59 | 8  |
| 1038 | IPI:IPI00915054.1 | Rpl10 Putative uncharacterized protein                                                            | 9.03 | 31.31 | 5  |
| 1039 | IPI:IPI00351252.4 | Gmps GMP synthase [glutamine-hydrolyzing]                                                         | 9.02 | 24.68 | 9  |
| 1040 | IPI:IPI00132539.3 | Btf3l4 Transcription factor BTF3 homolog 4                                                        | 9.01 | 68.35 | 9  |
| 1041 | IPI:IPI00655156.3 | Ccdc109a Isoform 1 of Coiled-coil domain-containing protein 109A                                  | 9.01 | 18.86 | 5  |
| 1042 | IPI:IPI00165849.3 | Isoc1 Isochorismatase domain-containing protein 1                                                 | 9.01 | 25.25 | 5  |
| 1043 | IPI:IPI00111416.1 | Stx12 Syntaxin-12                                                                                 | 9    | 36.86 | 7  |
| 1044 | IPI:IPI00315225.7 | Dynlrb1 Dynein light chain roadblock-type 1                                                       | 9    | 60.42 | 9  |
| 1045 | IPI:IPI00775783.1 | C1qbp Complement component 1 Q subcomponent-binding protein, mitochondrial                        | 9    | 31.9  | 7  |
| 1046 | IPI:IPI00798439.1 | Lta4h leukotriene A-4 hydrolase                                                                   | 8.99 | 12.44 | 6  |
| 1047 | IPI:IPI00329839.7 | Ddx42 Isoform 1 of ATP-dependent RNA helicase                                                     | 8.99 | 8.181 | 6  |



|      |                   |                                                                                   |      |       |    |
|------|-------------------|-----------------------------------------------------------------------------------|------|-------|----|
|      |                   | DDX42                                                                             |      |       |    |
| 1048 | IPI:IPI00129516.1 | Uqcrrh Cytochrome b-c1 complex subunit 6, mitochondrial                           | 8.98 | 66.29 | 9  |
| 1049 | IPI:IPI00900426.1 | Pcp2 purkinje cell protein 2 isoform 1                                            | 8.98 | 55.88 | 5  |
| 1050 | IPI:IPI00114407.2 | Thoc4 Isoform 1 of THO complex subunit 4                                          | 8.98 | 30.59 | 6  |
| 1051 | IPI:IPI00116938.1 | Gnb3 Guanine nucleotide-binding protein G(I)/G(S)/G(T) subunit beta-3             | 8.98 | 32.94 | 16 |
| 1052 | IPI:IPI00173156.1 | Lzic Protein LZIC                                                                 | 8.97 | 36.32 | 5  |
| 1053 | IPI:IPI00128945.1 | Psmb2 Proteasome subunit beta type-2                                              | 8.97 | 27.86 | 7  |
| 1054 | IPI:IPI00115644.2 | Sar1a Putative uncharacterized protein                                            | 8.97 | 30.81 | 7  |
| 1055 | IPI:IPI00135087.3 | Cops5 COP9 signalosome complex subunit 5                                          | 8.96 | 18.26 | 7  |
| 1056 | IPI:IPI00222767.1 | Pdhx Pyruvate dehydrogenase protein X component, mitochondrial                    | 8.96 | 11.98 | 5  |
| 1057 | IPI:IPI00404235.2 | LOC100047867 similar to mammary-derived growth inhibitor                          | 8.96 | 42.86 | 7  |
| 1058 | IPI:IPI00756275.2 | Plxnb2 MKIAA0315 protein                                                          | 8.95 | 4.818 | 5  |
| 1059 | IPI:IPI00409817.2 | Myl6 Isoform Non-muscle of Myosin light polypeptide 6                             | 8.94 | 49.67 | 9  |
| 1060 | IPI:IPI00911165.1 | Gspt1 eukaryotic peptide chain release factor GTP-binding subunit ERF3A isoform 2 | 8.93 | 12.6  | 6  |
| 1061 | IPI:IPI00877244.1 | Kif1a kinesin-like protein KIF1A isoform b                                        | 8.93 | 5.506 | 6  |
| 1062 | IPI:IPI00856249.1 | Kng1 Uncharacterized protein                                                      | 8.93 | 13.02 | 5  |
| 1063 | IPI:IPI00415908.4 | Ppme1 Protein phosphatase methylesterase 1                                        | 8.92 | 24.87 | 9  |
| 1064 | IPI:IPI00918916.1 | Eif2c2 protein argonaute-2                                                        | 8.92 | 12.21 | 8  |
| 1065 | IPI:IPI00307991.1 | Crk Isoform Crk-II of Adapter molecule crk                                        | 8.92 | 23.36 | 5  |
| 1066 | IPI:IPI00469103.1 | Kars lysyl-tRNA synthetase isoform 1                                              | 8.92 | 13.62 | 7  |
| 1067 | IPI:IPI00330269.3 | Dnajc6 Isoform 1 of Putative tyrosine-protein phosphatase auxilin                 | 8.92 | 10.55 | 5  |
| 1068 | IPI:IPI00112536.1 | Scrn1 Secernin-1                                                                  | 8.9  | 16.18 | 5  |
| 1069 | IPI:IPI00120374.1 | Ppp2ca Serine/threonine-protein phosphatase 2A catalytic subunit alpha isoform    | 8.89 | 27.83 | 7  |
| 1070 | IPI:IPI00114380.1 | Gstm5 Glutathione S-transferase Mu 5                                              | 8.89 | 29.02 | 7  |
| 1071 | IPI:IPI00918685.1 | Ube2v1 Ubiquitin-conjugating enzyme E2 variant 1                                  | 8.89 | 46.82 | 8  |
| 1072 | IPI:IPI00131177.1 | Letm1 LETM1 and EF-hand domain-containing protein 1, mitochondrial                | 8.89 | 9.892 | 6  |
| 1073 | IPI:IPI00125923.1 | Ostf1 Osteoclast-stimulating factor 1                                             | 8.89 | 34.88 | 5  |
| 1074 | IPI:IPI00453615.3 | Huwe1 Isoform 4 of E3 ubiquitin-protein ligase HUWE1                              | 8.88 | 3.053 | 8  |
| 1075 | IPI:IPI00752080.1 | Itgav Integrin alpha V                                                            | 8.88 | 5.655 | 5  |
| 1076 | IPI:IPI00119024.3 | Arl6ip5 PRA1 family protein 3                                                     | 8.88 | 20.21 | 7  |
| 1077 | IPI:IPI00626366.3 | Gm8730 similar to Acidic ribosomal phosphoprotein P0                              | 8.87 | 24.92 | 5  |
| 1078 | IPI:IPI00319973.3 | Pgrmc1 Membrane-associated progesterone receptor component 1                      | 8.87 | 36.92 | 8  |

|      |                   |                                                                            |      |       |     |
|------|-------------------|----------------------------------------------------------------------------|------|-------|-----|
| 1079 | IPI:IPI00123557.3 | Ruvbl2 RuvB-like 2                                                         | 8.87 | 18.79 | 8   |
| 1080 | IPI:IPI00132799.4 | C1qbp complement component 1 Q subcomponent-binding protein, mitochondrial | 8.87 | 31.9  | 7   |
| 1081 | IPI:IPI00122421.5 | Rpl27;Rpl27-ps3;Gm11518 60S ribosomal protein L27                          | 8.87 | 43.38 | 8   |
| 1082 | IPI:IPI00133163.3 | Atp6v1g1 V-type proton ATPase subunit G 1                                  | 8.87 | 39.83 | 6   |
| 1083 | IPI:IPI00947625.1 | Ptges2 prostaglandin E synthase 2                                          | 8.86 | 23.7  | 7   |
| 1084 | IPI:IPI00776018.2 | Dync1i2 Cytoplasmic dynein intermediate chain 2 isoform 2.1                | 8.86 | 16.03 | 6   |
| 1085 | IPI:IPI00131771.3 | Cox6c Cytochrome c oxidase subunit 6C                                      | 8.85 | 63.16 | 8   |
| 1086 | IPI:IPI00338327.1 | Ndr3 protein NDRG3 isoform 1                                               | 8.85 | 24.23 | 7   |
| 1087 | IPI:IPI00322562.5 | Rps14 40S ribosomal protein S14                                            | 8.85 | 41.06 | 6   |
| 1088 | IPI:IPI00469338.4 | Agpat3 1-acyl-sn-glycerol-3-phosphate acyltransferase gamma                | 8.84 | 19.41 | 9   |
| 1089 | IPI:IPI00131548.1 | Prosc Proline synthase co-transcribed bacterial homolog protein            | 8.84 | 25.91 | 5   |
| 1090 | IPI:IPI00135277.1 | Rbbp9;LOC677524 Putative hydrolase RBBP9                                   | 8.84 | 54.3  | 8   |
| 1091 | IPI:IPI00133948.1 | Fkbp2 Peptidyl-prolyl cis-trans isomerase FKBP2                            | 8.84 | 25    | 5   |
| 1092 | IPI:IPI00116360.3 | Trove2 60 kDa SS-A/Ro ribonucleoprotein                                    | 8.84 | 9.108 | 5   |
| 1093 | IPI:IPI00469918.4 | Rps16 Rps16 protein                                                        | 8.83 | 31.4  | 6   |
| 1094 | IPI:IPI00417005.1 | Ntm Neurotrimin                                                            | 8.83 | 23.26 | 6   |
| 1095 | IPI:IPI00849044.2 | Arcn1 Putative uncharacterized protein                                     | 8.83 | 18.59 | 6   |
| 1096 | IPI:IPI00109061.1 | Tubb2b Tubulin beta-2B chain                                               | 8.83 | 75.96 | 220 |
| 1097 | IPI:IPI00895557.1 | Myl1 Myosin, light polypeptide 1                                           | 8.82 | 53.53 | 9   |
| 1098 | IPI:IPI00625105.2 | Snrnp70 Isoform 1 of U1 small nuclear ribonucleoprotein 70 kDa             | 8.81 | 11.61 | 7   |
| 1099 | IPI:IPI00944141.1 | Rps5 40S ribosomal protein S5                                              | 8.81 | 34.8  | 7   |
| 1100 | IPI:IPI00845802.1 | Hba-a1;Hba-a2 hemoglobin alpha, adult chain 2                              | 8.81 | 91.55 | 98  |
| 1101 | IPI:IPI00129276.2 | Eif3a Eukaryotic translation initiation factor 3 subunit A                 | 8.8  | 5.729 | 6   |
| 1102 | IPI:IPI00187402.1 | Trnt1 Isoform 1 of tRNA-nucleotidyltransferase 1, mitochondrial            | 8.8  | 19.59 | 7   |
| 1103 | IPI:IPI00881332.1 | Caprin1 caprin-1 isoform b                                                 | 8.8  | 11.03 | 6   |
| 1104 | IPI:IPI00453849.3 | Rnmt Isoform 1 of mRNA cap guanine-N7 methyltransferase                    | 8.8  | 17.63 | 5   |
| 1105 | IPI:IPI00894941.1 | Fbxo2 F-box only protein 2                                                 | 8.79 | 13.13 | 4   |
| 1106 | IPI:IPI00224644.1 | Srrt Isoform C of Serrate RNA effector molecule homolog                    | 8.79 | 8.102 | 5   |
| 1107 | IPI:IPI00139780.1 | Rpl23 60S ribosomal protein L23                                            | 8.79 | 39.29 | 6   |
| 1108 | IPI:IPI00133066.3 | Psmd12 Putative uncharacterized protein                                    | 8.79 | 16.45 | 7   |
| 1109 | IPI:IPI00320016.7 | Nono Isoform 1 of Non-POU domain-containing octamer-binding protein        | 8.78 | 24.74 | 7   |
| 1110 | IPI:IPI00849793.1 | Rpl12 60S ribosomal protein L12                                            | 8.78 | 54.55 | 8   |
| 1111 | IPI:IPI00122548.3 | Vdac3 Voltage-dependent anion channel 3                                    | 8.77 | 31.34 | 15  |

|      |                   |                                                                                             |      |       |    |
|------|-------------------|---------------------------------------------------------------------------------------------|------|-------|----|
| 1112 | IPI:IPI00229517.5 | Lgals1 Galectin-1                                                                           | 8.77 | 43.7  | 9  |
| 1113 | IPI:IPI00131376.5 | Spnb1 spectrin beta chain, erythrocyte                                                      | 8.77 | 7.514 | 16 |
| 1114 | IPI:IPI00330523.1 | Pcca Propionyl-CoA carboxylase alpha chain, mitochondrial                                   | 8.77 | 10.91 | 7  |
| 1115 | IPI:IPI00331342.6 | Smu1 Isoform 1 of WD40 repeat-containing protein SMU1                                       | 8.77 | 16.76 | 6  |
| 1116 | IPI:IPI00454008.1 | Shmt2 Serine hydroxymethyltransferase                                                       | 8.76 | 15.87 | 6  |
| 1117 | IPI:IPI00127989.1 | Ptges3;LOC100048119;Gm9769 Prostaglandin E synthase 3                                       | 8.75 | 37.5  | 7  |
| 1118 | IPI:IPI00886393.1 | Cul5 cullin-5 isoform 2                                                                     | 8.72 | 8.295 | 5  |
| 1119 | IPI:IPI00463573.3 | Eif3l Eukaryotic translation initiation factor 3 subunit L                                  | 8.72 | 16.31 | 8  |
| 1120 | IPI:IPI00331490.5 | Akr7a5 Aflatoxin B1 aldehyde reductase member 2                                             | 8.72 | 21.25 | 5  |
| 1121 | IPI:IPI00881401.1 | Cpt2 carnitine O-palmitoyltransferase 2, mitochondrial precursor                            | 8.71 | 17.93 | 8  |
| 1122 | IPI:IPI00221426.3 | Gns N-acetylglucosamine-6-sulfatase                                                         | 8.71 | 7.169 | 5  |
| 1123 | IPI:IPI00121833.3 | Acaa1a 3-ketoacyl-CoA thiolase A, peroxisomal                                               | 8.71 | 20.52 | 7  |
| 1124 | IPI:IPI00890092.1 | Aldh7a1 Isoform 2 of Alpha-amino adipic semialdehyde dehydrogenase                          | 8.71 | 18.59 | 7  |
| 1125 | IPI:IPI00554928.3 | Nefl Neurofilament light polypeptide                                                        | 8.7  | 10.31 | 8  |
| 1126 | IPI:IPI00223377.1 | Mbp Isoform 4 of Myelin basic protein                                                       | 8.69 | 29.23 | 9  |
| 1127 | IPI:IPI00313900.1 | Lum Lumican                                                                                 | 8.69 | 21.89 | 7  |
| 1128 | IPI:IPI00876323.1 | Gm10221;Atp5l ATP synthase subunit g, mitochondrial                                         | 8.69 | 51.46 | 6  |
| 1129 | IPI:IPI00163011.2 | Txndc5 Thioredoxin domain-containing protein 5                                              | 8.69 | 18.94 | 5  |
| 1130 | IPI:IPI00113389.5 | Fam129a Protein Niban                                                                       | 8.68 | 6.911 | 5  |
| 1131 | IPI:IPI00380309.3 | Luc7l2 Isoform 1 of Putative RNA-binding protein Luc7-like 2                                | 8.68 | 12.76 | 7  |
| 1132 | IPI:IPI00121443.1 | Cox6a1 Cytochrome c oxidase polypeptide VIa                                                 | 8.66 | 55.36 | 6  |
| 1133 | IPI:IPI00120989.1 | Npl N-acetylneuraminase lyase                                                               | 8.66 | 20.94 | 6  |
| 1134 | IPI:IPI00515349.1 | Rhot1 Isoform 4 of Mitochondrial Rho GTPase 1                                               | 8.65 | 14.2  | 9  |
| 1135 | IPI:IPI00121545.1 | Ppp3ca Isoform 1 of Serine/threonine-protein phosphatase 2B catalytic subunit alpha isoform | 8.64 | 14.97 | 7  |
| 1136 | IPI:IPI00187443.1 | Eif5;LOC100047658 Eukaryotic translation initiation factor 5                                | 8.64 | 12.82 | 5  |
| 1137 | IPI:IPI00750671.1 | Dynlrb1 Dynein light chain roadblock-type 1                                                 | 8.63 | 60.42 | 10 |
| 1138 | IPI:IPI00344004.3 | Ndufa12 NADH dehydrogenase (Ubiquinone) 1 alpha subcomplex, 12                              | 8.63 | 46.98 | 8  |
| 1139 | IPI:IPI00918301.1 | Ndufab1 Protein                                                                             | 8.62 | 34.38 | 7  |
| 1140 | IPI:IPI00126000.1 | Fkbp3 Peptidyl-prolyl cis-trans isomerase FKBP3                                             | 8.62 | 28.13 | 5  |
| 1141 | IPI:IPI00474116.3 | Ppp3r1 Isoform 1 of Calcineurin subunit B type 1                                            | 8.62 | 54.12 | 8  |
| 1142 | IPI:IPI00222759.3 | Vat1l Synaptic vesicle membrane protein VAT-1 homolog-like                                  | 8.61 | 24.94 | 8  |
| 1143 | IPI:IPI00750405.2 | Bfsp1 Isoform 1 of Filensin                                                                 | 8.6  | 18.24 | 7  |

|      |                   |                                                                                   |      |       |    |
|------|-------------------|-----------------------------------------------------------------------------------|------|-------|----|
| 1144 | IPI:IPI00884509.1 | Serbp1 plasminogen activator inhibitor 1 RNA-binding protein isoform 2            | 8.6  | 17.21 | 5  |
| 1145 | IPI:IPI00221759.1 | Sephs1 Selenide, water dikinase 1                                                 | 8.59 | 20.92 | 5  |
| 1146 | IPI:IPI00225634.6 | Rps12;Gm15887 40S ribosomal protein S12                                           | 8.59 | 49.24 | 8  |
| 1147 | IPI:IPI00828796.1 | Ide insulin-degrading enzyme                                                      | 8.59 | 7.066 | 5  |
| 1148 | IPI:IPI00330303.7 | Atic;LOC100046995 Bifunctional purine biosynthesis protein PURH                   | 8.57 | 19.26 | 9  |
| 1149 | IPI:IPI00123129.1 | Snd1 Staphylococcal nuclease domain-containing protein 1                          | 8.56 | 9.67  | 6  |
| 1150 | IPI:IPI00331644.5 | Psma3 Proteasome subunit alpha type-3                                             | 8.56 | 20.39 | 6  |
| 1151 | IPI:IPI00320241.1 | Dnajb11 DnaJ homolog subfamily B member 11                                        | 8.55 | 15.36 | 5  |
| 1152 | IPI:IPI00309207.5 | Pafah1b1 Isoform 1 of Platelet-activating factor acetylhydrolase IB subunit alpha | 8.54 | 14.39 | 5  |
| 1153 | IPI:IPI00230766.4 | Pvalb Parvalbumin alpha                                                           | 8.54 | 46.36 | 6  |
| 1154 | IPI:IPI00867770.1 | Akap12 Isoform 2 of A-kinase anchor protein 12                                    | 8.53 | 7.283 | 7  |
| 1155 | IPI:IPI00136246.1 | Pitpnm1 Membrane-associated phosphatidylinositol transfer protein 1               | 8.53 | 8.367 | 8  |
| 1156 | IPI:IPI00123349.2 | Sec23a Protein transport protein Sec23A                                           | 8.53 | 8.758 | 6  |
| 1157 | IPI:IPI00890906.1 | Gpnmb transmembrane glycoprotein NMB precursor                                    | 8.53 | 5.226 | 6  |
| 1158 | IPI:IPI00474637.4 | Rpl10;LOC100048462;Rpl10-ps1;LOC100048223;Rpl10-ps3 60S ribosomal protein L10     | 8.52 | 38.32 | 8  |
| 1159 | IPI:IPI00927968.1 | Cpne6 copine-6 isoform b                                                          | 8.52 | 10.61 | 6  |
| 1160 | IPI:IPI00227392.5 | Ywhah 14-3-3 protein eta                                                          | 8.51 | 41.87 | 24 |
| 1161 | IPI:IPI00853932.1 | Dmxl2 Isoform 1 of DmX-like protein 2                                             | 8.51 | 3.364 | 9  |
| 1162 | IPI:IPI00122257.1 | Nt5e 5'-nucleotidase                                                              | 8.5  | 19.97 | 9  |
| 1163 | IPI:IPI00943445.1 | Iars isoleucyl-tRNA synthetase, cytoplasmic                                       | 8.5  | 5.309 | 5  |
| 1164 | IPI:IPI00755183.1 | Tpd52l2 Tumor protein D52-like 2                                                  | 8.5  | 32.31 | 7  |
| 1165 | IPI:IPI00323571.1 | ApoE Apolipoprotein E                                                             | 8.49 | 29.26 | 8  |
| 1166 | IPI:IPI00890867.1 | Rad23b UV excision repair protein RAD23 homolog B                                 | 8.49 | 24.28 | 8  |
| 1167 | IPI:IPI00403586.3 | Nceh1 Neutral cholesterol ester hydrolase 1                                       | 8.49 | 19.61 | 9  |
| 1168 | IPI:IPI00280207.1 | Ubqln1 Isoform 2 of Ubiquilin-1                                                   | 8.49 | 14.8  | 10 |
| 1169 | IPI:IPI00116770.1 | Rab18 Ras-related protein Rab-18                                                  | 8.49 | 34.47 | 7  |
| 1170 | IPI:IPI00132050.1 | Ndufc2;LOC675851 NADH dehydrogenase [ubiquinone] 1 subunit C2                     | 8.49 | 28.33 | 6  |
| 1171 | IPI:IPI00463367.2 | Usp7 Isoform 2 of Ubiquitin carboxyl-terminal hydrolase 7                         | 8.49 | 6.212 | 4  |
| 1172 | IPI:IPI00109142.4 | Esd S-formylglutathione hydrolase                                                 | 8.48 | 25.89 | 5  |
| 1173 | IPI:IPI00380331.1 | Ppp2r5d Protein phosphatase 2A B56 delta subunit                                  | 8.48 | 13.11 | 7  |
| 1174 | IPI:IPI00320420.3 | Clu Clusterin                                                                     | 8.47 | 19.2  | 7  |
| 1175 | IPI:IPI00652694.1 | Psmd3 Putative uncharacterized protein                                            | 8.47 | 14.15 | 7  |
| 1176 | IPI:IPI00120984.5 | Ndufa8 NADH dehydrogenase [ubiquinone] 1                                          | 8.47 | 34.88 | 5  |

|      |                   |                                                                                      |      |       |    |
|------|-------------------|--------------------------------------------------------------------------------------|------|-------|----|
|      |                   | alpha subcomplex subunit 8                                                           |      |       |    |
| 1177 | IPI:IPI00114802.1 | Ppm1a Protein phosphatase 1A                                                         | 8.46 | 23.82 | 8  |
| 1178 | IPI:IPI00875732.1 | Nif3l1 NIF3-like protein 1                                                           | 8.46 | 17.29 | 5  |
| 1179 | IPI:IPI00132485.2 | Pfdn1 Prefoldin subunit 1                                                            | 8.46 | 50    | 6  |
| 1180 | IPI:IPI00856665.1 | Pygl Phosphorylase                                                                   | 8.45 | 20.95 | 18 |
| 1181 | IPI:IPI00830478.1 | Fam120a Constitutive coactivator of PPAR-gamma-like protein 1                        | 8.45 | 8.543 | 9  |
| 1182 | IPI:IPI00116748.1 | Ndufa10 NADH dehydrogenase [ubiquinone] 1 alpha subcomplex subunit 10, mitochondrial | 8.43 | 23.66 | 8  |
| 1183 | IPI:IPI00271440.4 | Sncg Gamma-synuclein                                                                 | 8.43 | 54.47 | 8  |
| 1184 | IPI:IPI00116120.3 | Pdcd5;Gm3837 Uncharacterized protein                                                 | 8.43 | 44.53 | 6  |
| 1185 | IPI:IPI00120503.1 | Copb1 Coatomer subunit beta                                                          | 8.42 | 7.03  | 5  |
| 1186 | IPI:IPI00944009.1 | Eef1d Isoform 3 of Elongation factor 1-delta                                         | 8.42 | 10.61 | 6  |
| 1187 | IPI:IPI00379876.2 | Ttl12 Tubulin--tyrosine ligase-like protein 12                                       | 8.41 | 11.11 | 8  |
| 1188 | IPI:IPI00109727.1 | Thy1 Thy-1 membrane glycoprotein                                                     | 8.41 | 28.4  | 7  |
| 1189 | IPI:IPI00127417.1 | Nme2 Nucleoside diphosphate kinase B                                                 | 8.41 | 61.18 | 12 |
| 1190 | IPI:IPI00169550.1 | Rho Rhodopsin, isoform CRA_a                                                         | 8.41 | 18.97 | 14 |
| 1191 | IPI:IPI00895023.1 | Carkd Isoform 3 of Carbohydrate kinase domain-containing protein                     | 8.4  | 31.19 | 9  |
| 1192 | IPI:IPI00762713.1 | Dnajc6 Isoform 3 of Putative tyrosine-protein phosphatase auxilin                    | 8.39 | 8.368 | 6  |
| 1193 | IPI:IPI00830797.1 | Sf1 splicing factor 1 isoform 2                                                      | 8.39 | 15.88 | 6  |
| 1194 | IPI:IPI00876075.1 | Nrcam 123 kDa protein                                                                | 8.39 | 7.651 | 6  |
| 1195 | IPI:IPI00111166.7 | Hdhd2 Isoform 1 of Haloacid dehalogenase-like hydrolase domain-containing protein 2  | 8.39 | 30.12 | 7  |
| 1196 | IPI:IPI00653254.2 | Pygl glycogen phosphorylase, liver form                                              | 8.38 | 14    | 16 |
| 1197 | IPI:IPI00111981.1 | Ola1 Isoform 1 of Obg-like ATPase 1                                                  | 8.37 | 23.99 | 6  |
| 1198 | IPI:IPI00624746.3 | Gm15210 similar to Inosine 5-phosphate dehydrogenase 2                               | 8.37 | 11.4  | 8  |
| 1199 | IPI:IPI00120924.1 | Msi2 Isoform 1 of RNA-binding protein Musashi homolog 2                              | 8.37 | 30.64 | 9  |
| 1200 | IPI:IPI00134191.3 | Slc2a3 Solute carrier family 2, facilitated glucose transporter member 3             | 8.34 | 9.736 | 6  |
| 1201 | IPI:IPI00132474.3 | Itgb1 Integrin beta-1                                                                | 8.34 | 9.398 | 7  |
| 1202 | IPI:IPI00123501.3 | Hnrnpul1 Isoform 1 of Heterogeneous nuclear ribonucleoprotein U-like protein 1       | 8.34 | 7.567 | 6  |
| 1203 | IPI:IPI00831695.1 | Dazap1 DAZ-associated protein 1 isoform c                                            | 8.33 | 15.76 | 9  |
| 1204 | IPI:IPI00125460.1 | Atp5j;LOC674583 ATP synthase-coupling factor 6, mitochondrial                        | 8.33 | 56.48 | 9  |
| 1205 | IPI:IPI00135630.4 | Zfp385a zinc finger protein 385A                                                     | 8.33 | 21.5  | 5  |
| 1206 | IPI:IPI00956958.1 | Dbn1 drebrin isoform 2                                                               | 8.33 | 11.2  | 4  |
| 1207 | IPI:IPI00955744.1 | Rnh1 ribonuclease inhibitor isoform b                                                | 8.32 | 23.17 | 9  |
| 1208 | IPI:IPI00421085.1 | Cpsf6 Cleavage and polyadenylation specificity factor subunit 6                      | 8.32 | 16.15 | 6  |

|      |                        |                                                                             |      |       |   |
|------|------------------------|-----------------------------------------------------------------------------|------|-------|---|
| 1209 | IPI:IPI00169448.1      | Ube2m NEDD8-conjugating enzyme Ubc12                                        | 8.32 | 28.96 | 5 |
| 1210 | IPI:IPI00454049.4      | Echs1 Enoyl-CoA hydratase, mitochondrial                                    | 8.31 | 33.79 | 7 |
| 1211 | IPI:IPI00132623.3      | Ndufb9 NADH dehydrogenase [ubiquinone] 1 beta subcomplex subunit 9          | 8.31 | 43.58 | 5 |
| 1212 | IPI:IPI00130185.1      | Ppp1ca Serine/threonine-protein phosphatase PP1-alpha catalytic subunit     | 8.31 | 21.52 | 6 |
| 1213 | IPI:IPI00113849.1      | Cdc42 Isoform 2 of Cell division control protein 42 homolog                 | 8.29 | 38.74 | 9 |
| 1214 | IPI:IPI00133270.1      | Clpp Putative ATP-dependent Clp protease proteolytic subunit, mitochondrial | 8.29 | 29.41 | 6 |
| 1215 | IPI:IPI00134131.2      | Scp2 Isoform SCPx of Non-specific lipid-transfer protein                    | 8.29 | 12.25 | 7 |
| 1216 | IPI:IPI00170307.1      | Apoa1bp Apolipoprotein A-I-binding protein                                  | 8.29 | 19.5  | 5 |
| 1217 | IPI:IPI00222457.2      | Dars aspartyl-tRNA synthetase, cytoplasmic isoform 1                        | 8.28 | 16.97 | 7 |
| 1218 | IPI:IPI00153740.1      | Ahsa1 Activator of 90 kDa heat shock protein ATPase homolog 1               | 8.27 | 25.74 | 8 |
| 1219 | IPI:IPI00134353.3      | Nol3 Nucleolar protein 3                                                    | 8.27 | 32.73 | 7 |
| 1220 | IPI:IPI00136984.1      | Rps7 40S ribosomal protein S7                                               | 8.26 | 47.42 | 9 |
| 1221 | IPI:IPI00263048.2      | Numa1 nuclear mitotic apparatus protein 1                                   | 8.26 | 5.922 | 8 |
| 1222 | IPI:IPI00970409.1      | Rpl31 Putative uncharacterized protein                                      | 8.26 | 32.8  | 6 |
| 1223 | IPI:IPI00970097.1      | Gpd1 Uncharacterized protein                                                | 8.26 | 17.79 | 5 |
| 1224 | IPI:IPI00970148.1      | Ppp3cb Serine/threonine-protein phosphatase                                 | 8.26 | 13.36 | 5 |
| 1225 | IPI:IPI00308706.4      | Rpl5;Gm15500 60S ribosomal protein L5                                       | 8.25 | 27.61 | 9 |
| 1226 | IPI:IPI00944159.1      | Safb scaffold attachment factor B                                           | 8.25 | 12.91 | 9 |
| 1227 | IPI:IPI00115097.1      | Copb2 Coatomer subunit beta'                                                | 8.25 | 6.961 | 5 |
| 1228 | IPI:IPI00653072.1      | Dync1i2 Putative uncharacterized protein                                    | 8.25 | 19.94 | 6 |
| 1229 | IPI:IPI00228820.5      | Gstm2 Glutathione S-transferase Mu 2                                        | 8.24 | 38.07 | 9 |
| 1230 | IPI:IPI00225301.1      | Hsd1l Inactive hydroxysteroid dehydrogenase-like protein 1                  | 8.24 | 20    | 4 |
| 1231 | IPI:IPI00918921.1      | - Novel protein, possible orthologue of human TMEM189-UBE2V1                | 8.24 | 26.23 | 7 |
| 1232 | IPI:IPI00226263.5      | Mxra7 Matrix-remodeling-associated protein 7                                | 8.23 | 46.63 | 5 |
| 1233 | IPI:IPI00224626.3      | Sept7 septin-7                                                              | 8.23 | 10.78 | 4 |
| 1234 | IPI:IPI00169473.1      | Oplah 5-oxoprolinase                                                        | 8.23 | 4.581 | 5 |
| 1235 | IPI:IPI00170101.1      | Optn Optineurin                                                             | 8.22 | 9.932 | 5 |
| 1236 | IPI:IPI00108330.2      | Cnrip1 CB1 cannabinoid receptor-interacting protein 1                       | 8.22 | 51.83 | 6 |
| 1237 | IPI:IPI00119305.3      | Pa2g4 Proliferation-associated protein 2G4                                  | 8.22 | 23.86 | 7 |
| 1238 | IPI:IPI00314788.5      | Asl Argininosuccinate lyase                                                 | 8.22 | 11.42 | 6 |
| 1239 | IPI:IPI00322145.1<br>0 | Ptplad1 3-hydroxyacyl-CoA dehydratase 3                                     | 8.22 | 14.09 | 7 |
| 1240 | IPI:IPI00137930.1      | Eif1 Eukaryotic translation initiation factor 1                             | 8.21 | 63.72 | 6 |
| 1241 | IPI:IPI00121931.1      | Scrn2 Secernin-2                                                            | 8.21 | 22.35 | 5 |

|      |                   |                                                                           |      |       |    |
|------|-------------------|---------------------------------------------------------------------------|------|-------|----|
| 1242 | IPI:IPI00662244.2 | AgI amylo-1,6-glucosidase, 4-alpha-glucanotransferase                     | 8.21 | 4.7   | 5  |
| 1243 | IPI:IPI00915507.1 | Raly RNA-binding protein Raly short isoform                               | 8.2  | 21.96 | 6  |
| 1244 | IPI:IPI00230264.5 | H2afx Histone H2A.x                                                       | 8.19 | 27.27 | 8  |
| 1245 | IPI:IPI00313558.4 | Arcn1 Coatomer subunit delta                                              | 8.19 | 18.59 | 6  |
| 1246 | IPI:IPI00880613.1 | Ndufb10 Uncharacterized protein                                           | 8.19 | 40.27 | 6  |
| 1247 | IPI:IPI00133071.7 | Asprv1 Retroviral-like aspartic protease 1                                | 8.18 | 30.97 | 6  |
| 1248 | IPI:IPI00162781.2 | Ahcyl1 Putative adenosylhomocysteinase 2                                  | 8.17 | 23.4  | 9  |
| 1249 | IPI:IPI00323122.1 | Add2 Isoform 1 of Beta-adducin                                            | 8.17 | 9.931 | 7  |
| 1250 | IPI:IPI00221602.1 | Sfxn5 Sideroflexin-5                                                      | 8.17 | 14.62 | 5  |
| 1251 | IPI:IPI00116554.2 | Ptpn11 Isoform 1 of Tyrosine-protein phosphatase non-receptor type 11     | 8.17 | 16.42 | 7  |
| 1252 | IPI:IPI00874736.1 | Ctnnbl1 65 kDa protein                                                    | 8.16 | 5.516 | 5  |
| 1253 | IPI:IPI00380195.1 | Pgp Phosphoglycolate phosphatase                                          | 8.16 | 20.25 | 5  |
| 1254 | IPI:IPI00135626.2 | Aqp4 Isoform 2 of Aquaporin-4                                             | 8.16 | 14.24 | 4  |
| 1255 | IPI:IPI00113244.3 | Ttyh1 Isoform 1 of Protein tweety homolog 1                               | 8.16 | 15.11 | 6  |
| 1256 | IPI:IPI00654420.1 | Prosc Putative uncharacterized protein                                    | 8.16 | 19.02 | 4  |
| 1257 | IPI:IPI00321978.3 | Ranbp1 Ran-specific GTPase-activating protein (Fragment)                  | 8.15 | 27.59 | 6  |
| 1258 | IPI:IPI00555055.3 | H2afv 14 kDa protein                                                      | 8.15 | 63.57 | 8  |
| 1259 | IPI:IPI00132762.1 | Trap1 Heat shock protein 75 kDa, mitochondrial                            | 8.14 | 7.224 | 8  |
| 1260 | IPI:IPI00117896.3 | Mapre1 Microtubule-associated protein RP/EB family member 1               | 8.14 | 31.34 | 6  |
| 1261 | IPI:IPI00117944.1 | Tsg101 Tumor susceptibility gene 101 protein                              | 8.14 | 16.88 | 6  |
| 1262 | IPI:IPI00119220.1 | Snrpd2 Small nuclear ribonucleoprotein Sm D2                              | 8.14 | 47.46 | 5  |
| 1263 | IPI:IPI00223437.4 | Copg Putative uncharacterized protein                                     | 8.14 | 6.948 | 4  |
| 1264 | IPI:IPI00828976.1 | Tmpo lamina-associated polypeptide 2, isoforms alpha/zeta isoform epsilon | 8.13 | 27.43 | 9  |
| 1265 | IPI:IPI00652919.2 | Puf60 Isoform 1 of Poly(U)-binding-splicing factor PUF60                  | 8.13 | 20.04 | 7  |
| 1266 | IPI:IPI00226993.5 | Txn1 Thioredoxin                                                          | 8.13 | 43.81 | 9  |
| 1267 | IPI:IPI00553612.4 | Rpl27a 60S ribosomal protein L27a                                         | 8.13 | 27.03 | 6  |
| 1268 | IPI:IPI00275992.3 | Htra2 Serine protease HTRA2, mitochondrial                                | 8.13 | 16.16 | 5  |
| 1269 | IPI:IPI00130661.1 | Tpp1 Tripeptidyl-peptidase 1                                              | 8.12 | 14.95 | 6  |
| 1270 | IPI:IPI00850126.2 | LOC100044883 similar to RAB3C, member RAS oncogene family isoform 1       | 8.12 | 44.44 | 10 |
| 1271 | IPI:IPI00226215.1 | Slc6a11 Transporter                                                       | 8.12 | 8.293 | 5  |
| 1272 | IPI:IPI00667252.1 | LOC634785 similar to ribosomal protein L15                                | 8.12 | 20.9  | 5  |
| 1273 | IPI:IPI00118757.1 | Phpt1 14 kDa phosphohistidine phosphatase                                 | 8.12 | 54.03 | 8  |
| 1274 | IPI:IPI00316495.3 | Rab3c Ras-related protein Rab-3C                                          | 8.12 | 40.53 | 8  |
| 1275 | IPI:IPI00230310.5 | Hpca Neuron-specific calcium-binding protein hippocalcin                  | 8.11 | 47.67 | 9  |
| 1276 | IPI:IPI00884556.1 | Aipl1 aryl-hydrocarbon-interacting protein-like 1                         | 8.11 | 17.07 | 4  |

|      |                   |                                                                                   |      |       |    |
|------|-------------------|-----------------------------------------------------------------------------------|------|-------|----|
| 1277 | IPI:IPI00127691.1 | Gss Glutathione synthetase                                                        | 8.11 | 20.89 | 7  |
| 1278 | IPI:IPI00115538.2 | LOC100047211 similar to thymosin beta-4                                           | 8.11 | 15.87 | 5  |
| 1279 | IPI:IPI00266281.4 | Txn1 Thioredoxin-like protein 1                                                   | 8.1  | 28.37 | 7  |
| 1280 | IPI:IPI00387430.1 | Ndufb8 NADH dehydrogenase [ubiquinone] 1 beta subcomplex subunit 8, mitochondrial | 8.1  | 30.11 | 5  |
| 1281 | IPI:IPI00221841.1 | Pcmdt2 Protein-L-isoaspartate O-methyltransferase domain-containing protein 2     | 8.1  | 13.93 | 4  |
| 1282 | IPI:IPI00115992.1 | Gm4963 Uncharacterized protein                                                    | 8.1  | 29.6  | 5  |
| 1283 | IPI:IPI00127707.1 | Pcbp2 Isoform 1 of Poly(rC)-binding protein 2                                     | 8.09 | 65.19 | 29 |
| 1284 | IPI:IPI00113262.1 | Psmd14 26S proteasome non-ATPase regulatory subunit 14                            | 8.09 | 24.84 | 5  |
| 1285 | IPI:IPI00262743.6 | Tecr Trans-2,3-enoyl-CoA reductase                                                | 8.09 | 13.31 | 5  |
| 1286 | IPI:IPI00128249.1 | Ahsg Alpha-2-HS-glycoprotein                                                      | 8.09 | 32.17 | 9  |
| 1287 | IPI:IPI00453599.2 | Cfdp1 Craniofacial development protein 1                                          | 8.09 | 29.83 | 6  |
| 1288 | IPI:IPI00118676.3 | Eif4a1 Eukaryotic initiation factor 4A-I                                          | 8.08 | 44.83 | 22 |
| 1289 | IPI:IPI00652675.2 | Lsamp Putative uncharacterized protein                                            | 8.08 | 18.34 | 7  |
| 1290 | IPI:IPI00604945.2 | Mpst 3-mercaptopyruvate sulfurtransferase                                         | 8.08 | 34.68 | 9  |
| 1291 | IPI:IPI00319652.2 | Gpx1 Glutathione peroxidase 1                                                     | 8.08 | 47.26 | 7  |
| 1292 | IPI:IPI00845557.1 | Ctbp1 Isoform 2 of C-terminal-binding protein 1                                   | 8.08 | 12.79 | 5  |
| 1293 | IPI:IPI00132039.2 | Mtch2 Mitochondrial carrier homolog 2                                             | 8.08 | 28.71 | 6  |
| 1294 | IPI:IPI00135238.2 | Arl6 Putative uncharacterized protein                                             | 8.08 | 22.28 | 4  |
| 1295 | IPI:IPI00121319.1 | Crip2 Cysteine-rich protein 2                                                     | 8.08 | 25.96 | 4  |
| 1296 | IPI:IPI00122344.1 | Cth Cystathionine gamma-lyase                                                     | 8.08 | 19.35 | 4  |
| 1297 | IPI:IPI00123379.1 | Hdlbp Vigilin                                                                     | 8.07 | 9.385 | 8  |
| 1298 | IPI:IPI00831352.2 | Cirbp Uncharacterized protein                                                     | 8.07 | 50.93 | 9  |
| 1299 | IPI:IPI00625441.3 | Tpd52 tumor protein D52 isoform 1                                                 | 8.07 | 32.79 | 7  |
| 1300 | IPI:IPI00128345.2 | Ndufs6 NADH dehydrogenase [ubiquinone] iron-sulfur protein 6, mitochondrial       | 8.06 | 54.31 | 8  |
| 1301 | IPI:IPI00761592.1 | Eif3b 109 kDa protein                                                             | 8.06 | 8.669 | 5  |
| 1302 | IPI:IPI00112448.1 | Rps10 40S ribosomal protein S10                                                   | 8.06 | 26.67 | 5  |
| 1303 | IPI:IPI00761650.1 | Psmd9 26S proteasome non-ATPase regulatory subunit 9                              | 8.06 | 24.77 | 6  |
| 1304 | IPI:IPI00224093.2 | Phyhip1 Isoform 1 of Phytanoyl-CoA hydroxylase-interacting protein-like           | 8.05 | 18.93 | 8  |
| 1305 | IPI:IPI00652902.1 | Gnai2 Putative uncharacterized protein                                            | 8.05 | 36.9  | 21 |
| 1306 | IPI:IPI00130095.1 | G3bp1 Ras GTPase-activating protein-binding protein 1                             | 8.05 | 15.05 | 6  |
| 1307 | IPI:IPI00134484.1 | Timm13 Mitochondrial import inner membrane translocase subunit Tim13              | 8.05 | 53.68 | 5  |
| 1308 | IPI:IPI00126175.2 | S100a1 protein S100-A1                                                            | 8.05 | 38.3  | 8  |
| 1309 | IPI:IPI00648806.2 | Fam114a2 Isoform 2 of Protein FAM114A2                                            | 8.05 | 14.29 | 5  |
| 1310 | IPI:IPI00121623.1 | Dynll1 Dynein light chain 1, cytoplasmic                                          | 8.04 | 62.92 | 5  |
| 1311 | IPI:IPI00453776.1 | Eea1 Early endosome antigen 1                                                     | 8.04 | 6.804 | 7  |



|      |                   |                                                                                        |      |       |    |
|------|-------------------|----------------------------------------------------------------------------------------|------|-------|----|
| 1312 | IPI:IPI00775863.1 | Gnb2 41 kDa protein                                                                    | 8.04 | 29.06 | 28 |
| 1313 | IPI:IPI00753326.1 | Kif5c Putative uncharacterized protein                                                 | 8.03 | 19.25 | 14 |
| 1314 | IPI:IPI00122451.1 | Elavl3 Isoform HuC-L of ELAV-like protein 3                                            | 8.03 | 13.35 | 7  |
| 1315 | IPI:IPI00230763.1 | Uchl5 Isoform 2 of Ubiquitin carboxyl-terminal hydrolase isozyme L5                    | 8.03 | 22.56 | 5  |
| 1316 | IPI:IPI00928532.1 | Eif3f eukaryotic translation initiation factor 3 subunit F                             | 8.03 | 16.9  | 4  |
| 1317 | IPI:IPI00134941.1 | Kras Isoform 2B of GTPase KRas                                                         | 8.03 | 39.36 | 7  |
| 1318 | IPI:IPI00409918.1 | Eif4a2 Isoform 2 of Eukaryotic initiation factor 4A-II                                 | 8.03 | 43.63 | 20 |
| 1319 | IPI:IPI00761607.1 | Hdhd2 Uncharacterized protein                                                          | 8.02 | 31.66 | 9  |
| 1320 | IPI:IPI00121851.2 | Vbp1 Prefoldin subunit 3                                                               | 8.02 | 45.41 | 8  |
| 1321 | IPI:IPI00330591.1 | Csda Isoform 1 of DNA-binding protein A                                                | 8.02 | 26.87 | 7  |
| 1322 | IPI:IPI00625829.2 | Gm4617 hypothetical protein isoform 1                                                  | 8.02 | 35.45 | 9  |
| 1323 | IPI:IPI00677917.1 | - similar to hCG1640785                                                                | 8.02 | 24    | 7  |
| 1324 | IPI:IPI00749789.1 | LOC100046056 similar to Pre-B-cell leukemia transcription factor interacting protein 1 | 8.02 | 9.72  | 4  |
| 1325 | IPI:IPI00648685.1 | Ppp1r8 Protein phosphatase 1, regulatory (Inhibitor) subunit 8                         | 8.02 | 24.29 | 4  |
| 1326 | IPI:IPI00115824.1 | Nipsnap1 Protein NipSnap homolog 1                                                     | 8.02 | 32.75 | 8  |
| 1327 | IPI:IPI00116991.1 | Hars Histidyl-tRNA synthetase, cytoplasmic                                             | 8.01 | 11    | 5  |
| 1328 | IPI:IPI00125778.4 | Tagln2 Transgelin-2                                                                    | 8.01 | 40.7  | 9  |
| 1329 | IPI:IPI00874521.1 | Gm10136 Uncharacterized protein                                                        | 8.01 | 22.76 | 4  |
| 1330 | IPI:IPI00110315.1 | Rtcd1 RNA 3'-terminal phosphate cyclase                                                | 8.01 | 13.66 | 4  |
| 1331 | IPI:IPI00222557.5 | S100b Protein S100-B                                                                   | 8.01 | 32.61 | 6  |
| 1332 | IPI:IPI00117379.3 | Atox1 Copper transport protein ATOX1                                                   | 8.01 | 88.24 | 7  |
| 1333 | IPI:IPI00222397.5 | Cryga Gamma-crystallin A                                                               | 8.01 | 37.36 | 29 |
| 1334 | IPI:IPI00230194.5 | Gng2 Guanine nucleotide-binding protein G(I)/G(S)/G(O) subunit gamma-2                 | 8.01 | 52.11 | 7  |
| 1335 | IPI:IPI00807819.1 | LOC100044663 similar to Novel transmembrane domain containing protein                  | 8.01 | 30.96 | 4  |
| 1336 | IPI:IPI00121110.1 | Ralb Ras-related protein Ral-B                                                         | 8.01 | 26.21 | 5  |
| 1337 | IPI:IPI00928284.1 | Psap sulfated glycoprotein 1 isoform E preproprotein                                   | 8.01 | 10.64 | 5  |
| 1338 | IPI:IPI00121297.1 | Naca Nascent polypeptide-associated complex subunit alpha                              | 8    | 26.51 | 5  |
| 1339 | IPI:IPI00315808.3 | Mrps36 28S ribosomal protein S36, mitochondrial                                        | 8    | 69.61 | 5  |
| 1340 | IPI:IPI00468999.4 | Cds2 Phosphatidate cytidyltransferase 2                                                | 8    | 15.09 | 8  |
| 1341 | IPI:IPI00119067.3 | Tppp Tubulin polymerization-promoting protein                                          | 8    | 26.15 | 5  |
| 1342 | IPI:IPI00848566.1 | Macf1 microtubule-actin cross-linking factor 1                                         | 8    | 2.302 | 8  |
| 1343 | IPI:IPI00471246.2 | Ivd Isovaleryl-CoA dehydrogenase, mitochondrial                                        | 8    | 13.44 | 5  |
| 1344 | IPI:IPI00742282.1 | Prpf31 Isoform 2 of U4/U6 small nuclear ribonucleoprotein Prp31                        | 8    | 15.62 | 6  |
| 1345 | IPI:IPI00918942.1 | Cyb5 11 kDa protein                                                                    | 8    | 65.31 | 5  |

|      |                        |                                                                             |      |       |   |
|------|------------------------|-----------------------------------------------------------------------------|------|-------|---|
| 1346 | IPI:IPI00875986.1      | Gm5326;Gm6662 Androgen-binding protein (Fragment)                           | 7.99 | 52.69 | 6 |
| 1347 | IPI:IPI00420726.3      | Rps9 40S ribosomal protein S9                                               | 7.94 | 27.32 | 8 |
| 1348 | IPI:IPI00136483.1      | Psmb7 Proteasome subunit beta type-7                                        | 7.94 | 13.72 | 6 |
| 1349 | IPI:IPI00230277.3      | Mapk3 Mitogen-activated protein kinase 3                                    | 7.93 | 21.32 | 8 |
| 1350 | IPI:IPI00876001.1<br>4 | Snx1 sorting nexin-1                                                        | 7.92 | 17.24 | 8 |
| 1351 | IPI:IPI00121387.1      | Gna11 Guanine nucleotide-binding protein subunit alpha-11                   | 7.91 | 23.4  | 7 |
| 1352 | IPI:IPI00882156.1      | Nae1 Uncharacterized protein                                                | 7.91 | 13.14 | 4 |
| 1353 | IPI:IPI00126191.5      | Lmnb2 Isoform B2 of Lamin-B2                                                | 7.9  | 12.25 | 9 |
| 1354 | IPI:IPI00467447.3      | Iqgap1 Ras GTPase-activating-like protein IQGAP1                            | 7.9  | 4.587 | 5 |
| 1355 | IPI:IPI00113377.1      | Rplp1 60S acidic ribosomal protein P1                                       | 7.9  | 85.96 | 7 |
| 1356 | IPI:IPI00955167.1      | Mars methionyl-tRNA synthetase, cytoplasmic isoform 1                       | 7.9  | 8.681 | 7 |
| 1357 | IPI:IPI00330748.8      | Cngb1 cGMP-gated cation channel beta subunit                                | 7.89 | 4.981 | 9 |
| 1358 | IPI:IPI00851049.1      | - similar to ribosomal protein                                              | 7.89 | 40.79 | 8 |
| 1359 | IPI:IPI00856292.1      | Nrd1 Nardilysin, N-arginine dibasic convertase, NRD convertase 1            | 7.88 | 5.551 | 5 |
| 1360 | IPI:IPI00420136.2      | Snx3 sorting nexin-3                                                        | 7.88 | 32.1  | 7 |
| 1361 | IPI:IPI00828741.1      | Raly RNA-binding protein Raly long isoform                                  | 7.87 | 18.91 | 5 |
| 1362 | IPI:IPI00930898.1      | Nfasc neurofascin isoform 2 precursor                                       | 7.87 | 3.616 | 4 |
| 1363 | IPI:IPI00229008.2      | Ndufs4 NADH dehydrogenase [ubiquinone] iron-sulfur protein 4, mitochondrial | 7.86 | 28.57 | 5 |
| 1364 | IPI:IPI00848672.1      | Srsf11 splicing factor, arginine/serine-rich 11 isoform 2                   | 7.86 | 15.07 | 5 |
| 1365 | IPI:IPI00117689.1      | Ptrf Polymerase I and transcript release factor                             | 7.85 | 22.96 | 6 |
| 1366 | IPI:IPI00133801.3      | Gm6563;Sarnp SAP domain-containing ribonucleoprotein                        | 7.85 | 41.9  | 5 |
| 1367 | IPI:IPI00460063.2      | Pcyox1 Prenylcysteine oxidase                                               | 7.84 | 14.65 | 5 |
| 1368 | IPI:IPI00856375.1      | Ccdc136 Isoform 1 of Coiled-coil domain-containing protein 136              | 7.84 | 6.514 | 5 |
| 1369 | IPI:IPI00378120.2      | Glrx5 Glutaredoxin-related protein 5, mitochondrial                         | 7.83 | 35.53 | 4 |
| 1370 | IPI:IPI00125267.4      | Vapa Vesicle-associated membrane protein-associated protein A               | 7.82 | 26.91 | 9 |
| 1371 | IPI:IPI00649104.1      | Mapt Microtubule-associated protein                                         | 7.82 | 17.76 | 8 |
| 1372 | IPI:IPI00353927.1<br>5 | Hook3 Hook homolog 3                                                        | 7.82 | 13.75 | 7 |
| 1373 | IPI:IPI00226515.5      | Tagln Transgelin                                                            | 7.82 | 33.33 | 7 |
| 1374 | IPI:IPI00875457.1      | Lrp14 147 kDa protein                                                       | 7.8  | 9.418 | 9 |
| 1375 | IPI:IPI00224549.3      | Mylpf Myosin regulatory light chain 2, skeletal muscle isoform              | 7.79 | 39.05 | 8 |
| 1376 | IPI:IPI00955362.1      | Abpe androgen binding protein epsilon precursor                             | 7.79 | 45.61 | 8 |

|      |                   |                                                                           |      |       |    |
|------|-------------------|---------------------------------------------------------------------------|------|-------|----|
| 1377 | IPI:IPI00881291.1 | Acyp1 Acylphosphatase                                                     | 7.79 | 35.67 | 7  |
| 1378 | IPI:IPI00379513.6 | Fubp3 far upstream element (FUSE) binding protein 3                       | 7.78 | 9.565 | 6  |
| 1379 | IPI:IPI00762185.2 | Mpst Uncharacterized protein                                              | 7.78 | 16.72 | 5  |
| 1380 | IPI:IPI00123619.7 | Cyp2d22 cytochrome P450, family 2, subfamily d, polypeptide 22            | 7.77 | 12.4  | 5  |
| 1381 | IPI:IPI00121427.1 | S100a6 Protein S100-A6                                                    | 7.77 | 39.33 | 4  |
| 1382 | IPI:IPI00850420.1 | LOC100044883 similar to RAB3C, member RAS oncogene family isoform 2       | 7.77 | 39.37 | 9  |
| 1383 | IPI:IPI00406741.5 | Mtap4 Isoform 4 of Microtubule-associated protein 4                       | 7.76 | 10.09 | 6  |
| 1384 | IPI:IPI00665601.1 | LOC637733 similar to high-mobility group box 1                            | 7.76 | 25.82 | 7  |
| 1385 | IPI:IPI00648240.1 | Unc119 Unc-119 homolog                                                    | 7.76 | 30.53 | 7  |
| 1386 | IPI:IPI00229951.1 | Lgsn Lengsin                                                              | 7.75 | 7.638 | 6  |
| 1387 | IPI:IPI00126762.1 | Csnk2b Casein kinase II subunit beta                                      | 7.74 | 27.91 | 6  |
| 1388 | IPI:IPI00271986.6 | Atp5j2 ATP synthase subunit f, mitochondrial                              | 7.74 | 40.91 | 9  |
| 1389 | IPI:IPI00187301.1 | Ciapin1 Anamorsin                                                         | 7.73 | 29.13 | 6  |
| 1390 | IPI:IPI00408957.3 | Sugt1 Suppressor of G2 allele of SKP1 homolog                             | 7.71 | 26.79 | 7  |
| 1391 | IPI:IPI00123920.2 | Serpina1c Alpha-1-antitrypsin 1-3                                         | 7.71 | 45.15 | 27 |
| 1392 | IPI:IPI00280566.3 | Abpz Androgen-binding protein zeta                                        | 7.7  | 47.32 | 7  |
| 1393 | IPI:IPI00153644.3 | Pbxip1 Pre-B-cell leukemia transcription factor-interacting protein 1     | 7.69 | 9.078 | 4  |
| 1394 | IPI:IPI00113259.5 | 4930583H14Rik Uncharacterized protein C4orf49 homolog                     | 7.68 | 68.9  | 8  |
| 1395 | IPI:IPI00128867.3 | Purb Transcriptional activator protein Pur-beta                           | 7.67 | 33.95 | 8  |
| 1396 | IPI:IPI00114958.1 | Kng1 Isoform HMW of Kininogen-1                                           | 7.67 | 7.867 | 4  |
| 1397 | IPI:IPI00319518.4 | Lonp1 Lon protease homolog                                                | 7.67 | 11.23 | 7  |
| 1398 | IPI:IPI00322209.5 | Krt8 Keratin, type II cytoskeletal 8                                      | 7.66 | 14.9  | 9  |
| 1399 | IPI:IPI00471475.1 | Serbp1 Isoform 1 of Plasminogen activator inhibitor 1 RNA-binding protein | 7.65 | 14.99 | 6  |
| 1400 | IPI:IPI00230707.6 | Ywhag 14-3-3 protein gamma                                                | 7.64 | 61.94 | 36 |
| 1401 | IPI:IPI00970075.1 | Txndc5 39 kDa protein                                                     | 7.63 | 22.67 | 7  |
| 1402 | IPI:IPI00221581.1 | Eif4b Eukaryotic translation initiation factor 4B                         | 7.63 | 10.15 | 5  |
| 1403 | IPI:IPI00874692.1 | Gm4294 similar to ribosomal protein L15                                   | 7.63 | 20.1  | 4  |
| 1404 | IPI:IPI00918134.1 | Acin1 Apoptotic chromatin condensation inducer 1                          | 7.63 | 10.87 | 5  |
| 1405 | IPI:IPI00319214.1 | Mettl3 Isoform 1 of N6-adenosine-methyltransferase 70 kDa subunit         | 7.62 | 10.69 | 5  |
| 1406 | IPI:IPI00320034.6 | Polr2b DNA-directed RNA polymerase II subunit RPB2                        | 7.61 | 6.133 | 5  |
| 1407 | IPI:IPI00938530.1 | Myh11 myosin-11 isoform 1                                                 | 7.6  | 9.598 | 15 |
| 1408 | IPI:IPI00622283.3 | Xpo5 Isoform 1 of Exportin-5                                              | 7.6  | 5.565 | 5  |
| 1409 | IPI:IPI00648142.2 | Sec23ip SEC23-interacting protein                                         | 7.6  | 6.413 | 4  |
| 1410 | IPI:IPI00132473.3 | Nudt21 Cleavage and polyadenylation specificity factor subunit 5          | 7.6  | 22.47 | 5  |

|      |                   |                                                           |      |       |   |
|------|-------------------|-----------------------------------------------------------|------|-------|---|
| 1411 | IPI:IPI00944731.1 | Mpp4 MAGUK p55 subfamily member 4 isoform 1               | 7.59 | 16.82 | 8 |
| 1412 | IPI:IPI00454083.1 | Kif21a Isoform 3 of Kinesin-like protein KIF21A           | 7.59 | 3.318 | 4 |
| 1413 | IPI:IPI00480275.1 | Pfdn5 Prefoldin subunit 5                                 | 7.59 | 35.71 | 5 |
| 1414 | IPI:IPI00109221.3 | Sacm1 Phosphatidylinositol phosphatase SAC1               | 7.59 | 10.39 | 7 |
| 1415 | IPI:IPI00223713.5 | Hist1h1c Histone H1.2                                     | 7.58 | 26.89 | 7 |
| 1416 | IPI:IPI00124829.5 | Arpc3 Actin-related protein 2/3 complex subunit 3         | 7.58 | 26.4  | 5 |
| 1417 | IPI:IPI00845833.1 | Ppp3r1 Isoform 2 of Calcineurin subunit B type 1          | 7.57 | 57.5  | 8 |
| 1418 | IPI:IPI00553576.3 | Abcd3 ATP-binding cassette sub-family D member 3          | 7.55 | 12.14 | 7 |
| 1419 | IPI:IPI00903356.1 | - BetaCstF-64 variant 3                                   | 7.55 | 11.75 | 5 |
| 1420 | IPI:IPI00132410.1 | Rab5a Ras-related protein Rab-5A                          | 7.53 | 53.49 | 8 |
| 1421 | IPI:IPI00877279.1 | Anxa3 annexin A3                                          | 7.52 | 17.65 | 4 |
| 1422 | IPI:IPI00467495.4 | Gmfb Glia maturation factor, beta                         | 7.52 | 41.96 | 5 |
| 1423 | IPI:IPI00471341.2 | Ubl4 Ubiquitin-like protein 4A                            | 7.52 | 31.21 | 4 |
| 1424 | IPI:IPI00420467.1 | Pvrl1 Poliovirus receptor-related 1                       | 7.51 | 12.62 | 8 |
| 1425 | IPI:IPI00310567.2 | Pon2 Serum paraoxonase/arylesterase 2                     | 7.51 | 18.64 | 4 |
| 1426 | IPI:IPI00928320.1 | Psap sulfated glycoprotein 1 isoform F preproprotein      | 7.51 | 12.34 | 8 |
| 1427 | IPI:IPI00885252.1 | Pdcd5 Uncharacterized protein                             | 7.51 | 22.93 | 5 |
| 1428 | IPI:IPI00222419.5 | Gm10053;Cycs Cytochrome c, somatic                        | 7.49 | 41.9  | 6 |
| 1429 | IPI:IPI00132350.1 | Cisd2 CDGSH iron-sulfur domain-containing protein 2       | 7.49 | 31.11 | 4 |
| 1430 | IPI:IPI00133920.3 | Sec13 Protein SEC13 homolog                               | 7.48 | 16.77 | 4 |
| 1431 | IPI:IPI00874685.1 | Nnt 116 kDa protein                                       | 7.48 | 7.418 | 5 |
| 1432 | IPI:IPI00844763.1 | Cask Isoform 1 of Peripheral plasma membrane protein CASK | 7.48 | 7.991 | 5 |
| 1433 | IPI:IPI00752942.1 | Luc7l3 Isoform 3 of Luc7-like protein 3                   | 7.47 | 7.338 | 5 |
| 1434 | IPI:IPI00122015.1 | Fam49b Protein FAM49B                                     | 7.47 | 25.62 | 5 |
| 1435 | IPI:IPI00221769.5 | Ak3 GTP:AMP phosphotransferase, mitochondrial             | 7.47 | 24.23 | 5 |
| 1436 | IPI:IPI00881311.1 | Klc1 64 kDa protein                                       | 7.47 | 8.393 | 4 |
| 1437 | IPI:IPI00322312.3 | Arhgdia Rho GDP-dissociation inhibitor 1                  | 7.45 | 46.08 | 9 |
| 1438 | IPI:IPI00886162.1 | Ncln Uncharacterized protein                              | 7.45 | 9.609 | 5 |
| 1439 | IPI:IPI00331444.7 | Ipo7 Importin-7                                           | 7.44 | 9.249 | 9 |
| 1440 | IPI:IPI00315550.3 | Glrx3 Glutaredoxin-3                                      | 7.44 | 19.29 | 6 |
| 1441 | IPI:IPI00311515.2 | Napb Beta-soluble NSF attachment protein                  | 7.43 | 34.23 | 8 |
| 1442 | IPI:IPI00405977.6 | Macf1 Microtubule-actin crosslinking factor 1             | 7.43 | 2.396 | 7 |
| 1443 | IPI:IPI00918973.1 | Strap Serine-threonine kinase receptor-associated protein | 7.42 | 15.14 | 4 |
| 1444 | IPI:IPI00322828.1 | Farsb Phenylalanyl-tRNA synthetase beta chain             | 7.42 | 6.791 | 4 |
| 1445 | IPI:IPI00874440.1 | Sept7 Septin-7                                            | 7.42 | 19.72 | 6 |
| 1446 | IPI:IPI00626233.3 | Rpl17-ps3 similar to Rpl17 protein                        | 7.42 | 18.06 | 5 |
| 1447 | IPI:IPI00881469.1 | Gstt1 glutathione S-transferase theta-1                   | 7.41 | 16.67 | 5 |

|      |                   |                                                                                          |      |       |    |
|------|-------------------|------------------------------------------------------------------------------------------|------|-------|----|
| 1448 | IPI:IPI00117083.1 | Grpel1 GrpE protein homolog 1, mitochondrial                                             | 7.41 | 22.12 | 4  |
| 1449 | IPI:IPI00277552.3 | Oxr1 Isoform 1 of Oxidation resistance protein 1                                         | 7.41 | 14.2  | 8  |
| 1450 | IPI:IPI00109611.1 | Fam162a Protein FAM162A                                                                  | 7.4  | 27.1  | 4  |
| 1451 | IPI:IPI00875040.1 | Pcp4;Igsf5 Uncharacterized protein                                                       | 7.4  | 20.3  | 8  |
| 1452 | IPI:IPI00466610.5 | Map2k1 Dual specificity mitogen-activated protein kinase kinase 1                        | 7.38 | 27.48 | 9  |
| 1453 | IPI:IPI00874654.1 | Hist1h2be;Hist1h2bg;Gm9998;Hist1h2bc Histone H2B                                         | 7.38 | 26.12 | 14 |
| 1454 | IPI:IPI00468688.4 | Tars Threonyl-tRNA synthetase, cytoplasmic                                               | 7.38 | 7.756 | 5  |
| 1455 | IPI:IPI00473688.1 | Sirt2 Isoform 2 of NAD-dependent deacetylase sirtuin-2                                   | 7.38 | 16.19 | 4  |
| 1456 | IPI:IPI00127713.1 | Atp2b2 Plasma membrane calcium-transporting ATPase 2                                     | 7.37 | 21.79 | 19 |
| 1457 | IPI:IPI00308187.1 | Vapb vesicle-associated membrane protein-associated protein B                            | 7.37 | 27.57 | 5  |
| 1458 | IPI:IPI00876369.1 | Celf2 42 kDa protein                                                                     | 7.37 | 11.11 | 5  |
| 1459 | IPI:IPI00321348.3 | Igsf8 Immunoglobulin superfamily member 8                                                | 7.36 | 12.6  | 5  |
| 1460 | IPI:IPI00875852.1 | Ewsr1 RNA-binding protein EWS                                                            | 7.34 | 13.13 | 9  |
| 1461 | IPI:IPI00134820.1 | Drg2 Developmentally-regulated GTP-binding protein 2                                     | 7.33 | 16.48 | 4  |
| 1462 | IPI:IPI00762049.2 | Prkar1a cAMP-dependent protein kinase type I-alpha regulatory subunit                    | 7.32 | 19.95 | 7  |
| 1463 | IPI:IPI00473445.1 | Rpl21-ps8 Uncharacterized protein                                                        | 7.31 | 35.62 | 5  |
| 1464 | IPI:IPI00129755.2 | Serpina1b Alpha-1-antitrypsin 1-2                                                        | 7.3  | 52.3  | 27 |
| 1465 | IPI:IPI00114560.5 | Rab1 Ras-related protein Rab-1A                                                          | 7.29 | 66.83 | 22 |
| 1466 | IPI:IPI00118217.3 | Stx7 Syntaxin-7                                                                          | 7.29 | 26.05 | 4  |
| 1467 | IPI:IPI00399631.1 | Sgta Isoform 2 of Small glutamine-rich tetratricopeptide repeat-containing protein alpha | 7.28 | 27.71 | 9  |
| 1468 | IPI:IPI00928300.1 | Rangap1 ran GTPase-activating protein 1                                                  | 7.28 | 9.677 | 5  |
| 1469 | IPI:IPI00955148.1 | Chchd6 coiled-coil-helix-coiled-coil-helix domain-containing protein 6 isoform 1         | 7.28 | 15.38 | 4  |
| 1470 | IPI:IPI00112414.1 | Cse1l Exportin-2                                                                         | 7.27 | 9.784 | 7  |
| 1471 | IPI:IPI00627029.1 | Rgs7 Regulator of G-protein signaling 7                                                  | 7.27 | 7.036 | 4  |
| 1472 | IPI:IPI00120871.1 | Trmt112;Gm13072 tRNA methyltransferase 112 homolog                                       | 7.27 | 48    | 5  |
| 1473 | IPI:IPI00831568.1 | L1cam L1 cell adhesion molecule                                                          | 7.27 | 5.2   | 4  |
| 1474 | IPI:IPI00162942.1 | Mrpl37 39S ribosomal protein L37, mitochondrial                                          | 7.26 | 14.42 | 4  |
| 1475 | IPI:IPI00130344.3 | Clic1 Chloride intracellular channel protein 1                                           | 7.26 | 40.25 | 6  |
| 1476 | IPI:IPI00420231.4 | Xpnpep1 X-prolyl aminopeptidase (Aminopeptidase P) 1, soluble, isoform CRA_b             | 7.25 | 15.17 | 8  |
| 1477 | IPI:IPI00761421.2 | Gm10362 similar to Rpl17 protein                                                         | 7.25 | 19.31 | 6  |
| 1478 | IPI:IPI00228674.3 | Tceal5 Transcription elongation factor A protein-like 5                                  | 7.25 | 24    | 6  |
| 1479 | IPI:IPI00378557.3 | Pfdn4 prefoldin 4 isoform 1                                                              | 7.25 | 34.33 | 4  |

|      |                   |                                                                                     |      |       |    |
|------|-------------------|-------------------------------------------------------------------------------------|------|-------|----|
| 1480 | IPI:IPI00877268.1 | Snx12 sorting nexin-12 isoform 3                                                    | 7.25 | 43.98 | 9  |
| 1481 | IPI:IPI00124149.1 | LOC100044514;Nutf2;Gm10349 Nuclear transport factor 2                               | 7.24 | 40.16 | 4  |
| 1482 | IPI:IPI00225400.2 | Mbnl2 Isoform 1 of Muscleblind-like protein 2                                       | 7.24 | 15.28 | 4  |
| 1483 | IPI:IPI00128285.1 | Ndufv3 NADH dehydrogenase (Ubiquinone) flavoprotein 3                               | 7.23 | 19.19 | 7  |
| 1484 | IPI:IPI00845803.1 | Snca Isoform 2 of Alpha-synuclein                                                   | 7.23 | 58.68 | 9  |
| 1485 | IPI:IPI00229845.3 | Prmt5 Protein arginine N-methyltransferase 5                                        | 7.22 | 7.221 | 4  |
| 1486 | IPI:IPI00775965.1 | Nras GTPase NRas                                                                    | 7.21 | 39.15 | 7  |
| 1487 | IPI:IPI00125450.3 | Nme3 Nucleoside diphosphate kinase 3                                                | 7.21 | 30.18 | 4  |
| 1488 | IPI:IPI00458765.2 | Khdrbs1 KH domain-containing, RNA-binding, signal transduction-associated protein 1 | 7.2  | 23.7  | 9  |
| 1489 | IPI:IPI00277915.3 | Guca1a Guanylate cyclase activator 1a (Retina), isoform CRA_a                       | 7.2  | 23.27 | 5  |
| 1490 | IPI:IPI00320188.5 | Nampt Nicotinamide phosphoribosyltransferase                                        | 7.19 | 24.44 | 9  |
| 1491 | IPI:IPI00119131.2 | Cyb5r1 Isoform 1 of NADH-cytochrome b5 reductase 1                                  | 7.19 | 33.11 | 8  |
| 1492 | IPI:IPI00407917.1 | Gm5451 Uncharacterized protein                                                      | 7.19 | 18.75 | 4  |
| 1493 | IPI:IPI00165706.1 | Gm10241;Gm13690;Sumo2;Gm13430;LOC100044181 Small ubiquitin-related modifier 2       | 7.18 | 58.95 | 5  |
| 1494 | IPI:IPI00623241.3 | Sgip1 SH3-domain GRB2-like interacting protein 1 alpha                              | 7.17 | 8.431 | 6  |
| 1495 | IPI:IPI00225201.5 | Iars Isoleucyl-tRNA synthetase, cytoplasmic                                         | 7.15 | 5.943 | 6  |
| 1496 | IPI:IPI00135655.3 | Vapb Vesicle-associated membrane protein-associated protein B                       | 7.15 | 35.8  | 8  |
| 1497 | IPI:IPI00132960.2 | Acy1 Aminoacylase-1                                                                 | 7.14 | 22.55 | 7  |
| 1498 | IPI:IPI00228680.2 | Nrxn3 neurexin III                                                                  | 7.13 | 3.965 | 4  |
| 1499 | IPI:IPI00117178.1 | Aip AH receptor-interacting protein                                                 | 7.13 | 16.06 | 5  |
| 1500 | IPI:IPI00471441.1 | Ptms Ptms protein                                                                   | 7.13 | 20.38 | 9  |
| 1501 | IPI:IPI00112320.4 | Wdr61 WD repeat-containing protein 61                                               | 7.13 | 21.31 | 4  |
| 1502 | IPI:IPI00121887.5 | Tcea1 Isoform 2 of Transcription elongation factor A protein 1                      | 7.12 | 29.57 | 7  |
| 1503 | IPI:IPI00114945.1 | Sept2 Septin-2                                                                      | 7.12 | 19.11 | 5  |
| 1504 | IPI:IPI00857195.1 | Itgav integrin alpha-V precursor                                                    | 7.12 | 4.598 | 3  |
| 1505 | IPI:IPI00128155.2 | Ctbp1 Isoform 1 of C-terminal-binding protein 1                                     | 7.11 | 23.58 | 10 |
| 1506 | IPI:IPI00664442.3 | Slc4a7 sodium bicarbonate cotransporter 3                                           | 7.09 | 7.073 | 6  |
| 1507 | IPI:IPI00918862.1 | Pccb Propionyl Coenzyme A carboxylase, beta polypeptide, isoform CRA_a              | 7.08 | 14.79 | 5  |
| 1508 | IPI:IPI00119680.3 | Ap1m1 AP-1 complex subunit mu-1                                                     | 7.08 | 12.77 | 4  |
| 1509 | IPI:IPI00110705.1 | Prdxd1 Isoform 1 of PrdX-deacylase domain-containing protein 1                      | 7.08 | 32.54 | 4  |
| 1510 | IPI:IPI00221608.3 | Samm50 Sorting and assembly machinery component 50 homolog                          | 7.06 | 19.4  | 9  |
| 1511 | IPI:IPI00785371.2 | L1cam neural cell adhesion molecule L1                                              | 7.06 | 6.434 | 5  |

|      |                   |                                                                                     |      |       |    |
|------|-------------------|-------------------------------------------------------------------------------------|------|-------|----|
| 1512 | IPI:IPI00128778.1 | Sh3glb1 Isoform 2 of Endophilin-B1                                                  | 7.06 | 16.32 | 5  |
| 1513 | IPI:IPI00117072.1 | Ppm1g Protein phosphatase 1G                                                        | 7.06 | 11.44 | 4  |
| 1514 | IPI:IPI00120097.1 | Slc27a1 Long-chain fatty acid transport protein 1                                   | 7.06 | 10.84 | 4  |
| 1515 | IPI:IPI00554870.2 | Gstt2 Glutathione S-transferase theta-2                                             | 7.05 | 19.26 | 4  |
| 1516 | IPI:IPI00651878.1 | Ak4 Putative uncharacterized protein (Fragment)                                     | 7.04 | 13.95 | 4  |
| 1517 | IPI:IPI00649019.1 | Ndufs5 NADH dehydrogenase (Ubiquinone) Fe-S protein 5                               | 7.04 | 48.35 | 5  |
| 1518 | IPI:IPI00776252.1 | Txnrd1 Isoform 1 of Thioredoxin reductase 1, cytoplasmic                            | 7.03 | 10.44 | 5  |
| 1519 | IPI:IPI00314520.3 | Khdrbs3 KH domain-containing, RNA-binding, signal transduction-associated protein 3 | 7.02 | 16.76 | 9  |
| 1520 | IPI:IPI00118022.1 | Ap2s1 AP-2 complex subunit sigma                                                    | 7.02 | 28.17 | 5  |
| 1521 | IPI:IPI00133557.1 | Tppp3 Tubulin polymerization-promoting protein family member 3                      | 7    | 40.34 | 7  |
| 1522 | IPI:IPI00230623.8 | Rpl32 60S ribosomal protein L32                                                     | 6.99 | 39.26 | 6  |
| 1523 | IPI:IPI00331579.1 | Syng3 Synaptogyrin-3                                                                | 6.99 | 14.85 | 4  |
| 1524 | IPI:IPI00124282.1 | Rala Ras-related protein Ral-A                                                      | 6.98 | 19.42 | 6  |
| 1525 | IPI:IPI00938439.1 | Dpp3 dipeptidyl-peptidase 3                                                         | 6.97 | 15.18 | 8  |
| 1526 | IPI:IPI00125931.1 | Cstb Cystatin-B                                                                     | 6.97 | 63.27 | 7  |
| 1527 | IPI:IPI00132390.5 | Ndufb4;Gm3244;Gm3873 NADH dehydrogenase [ubiquinone] 1 beta subcomplex subunit 4    | 6.97 | 45.74 | 4  |
| 1528 | IPI:IPI00470004.3 | Endod1 Endonuclease domain-containing 1 protein                                     | 6.97 | 14.77 | 4  |
| 1529 | IPI:IPI00119545.2 | Pfdn2 Prefoldin subunit 2                                                           | 6.96 | 28.57 | 5  |
| 1530 | IPI:IPI00223055.3 | Qars glutamyl-tRNA synthetase isoform 1                                             | 6.95 | 8.387 | 5  |
| 1531 | IPI:IPI00755161.2 | Osbp oxysterol-binding protein 1                                                    | 6.95 | 7.826 | 6  |
| 1532 | IPI:IPI00135677.2 | Ehd3 EH domain-containing protein 3                                                 | 6.95 | 12.15 | 6  |
| 1533 | IPI:IPI00123063.5 | Clip1 Isoform 1 of CAP-Gly domain-containing linker protein 1                       | 6.94 | 4.529 | 4  |
| 1534 | IPI:IPI00622371.3 | Eif3g Eukaryotic translation initiation factor 3 subunit G                          | 6.94 | 19.69 | 6  |
| 1535 | IPI:IPI00119663.3 | Mapk1 Mitogen-activated protein kinase 1                                            | 6.93 | 30.45 | 9  |
| 1536 | IPI:IPI00755997.2 | Golga2 golgin subfamily A member 2 isoform a                                        | 6.93 | 7.895 | 6  |
| 1537 | IPI:IPI00756139.1 | Syp Syp protein                                                                     | 6.92 | 14.61 | 9  |
| 1538 | IPI:IPI00830514.1 | Ddx42 Isoform 2 of ATP-dependent RNA helicase DDX42                                 | 6.92 | 10    | 5  |
| 1539 | IPI:IPI00280629.9 | Tdrd7 Tudor domain-containing protein 7                                             | 6.92 | 6.077 | 5  |
| 1540 | IPI:IPI00659000.1 | Gm12657 predicted gene 12657                                                        | 6.91 | 30.15 | 5  |
| 1541 | IPI:IPI00120083.1 | Tmem43 Transmembrane protein 43                                                     | 6.9  | 13.5  | 4  |
| 1542 | IPI:IPI00124610.1 | Arl8a ADP-ribosylation factor-like protein 8A                                       | 6.9  | 33.87 | 6  |
| 1543 | IPI:IPI00874728.1 | Tpm2 Isoform 2 of Tropomyosin beta chain                                            | 6.9  | 31.69 | 12 |
| 1544 | IPI:IPI00971257.1 | Gm10166 similar to Ac2-210 isoform 2                                                | 6.89 | 23.04 | 7  |
| 1545 | IPI:IPI00223793.2 | Traf3ip3 TRAF3-interacting JNK-activating modulator                                 | 6.88 | 12.48 | 5  |

|      |                   |                                                                                                   |      |       |   |
|------|-------------------|---------------------------------------------------------------------------------------------------|------|-------|---|
| 1546 | IPI:IPI00121575.1 | Alg2 Alpha-1,3-mannosyltransferase ALG2                                                           | 6.88 | 12.77 | 6 |
| 1547 | IPI:IPI00816839.1 | Sae1 Isoform 2 of SUMO-activating enzyme subunit 1                                                | 6.88 | 26.52 | 8 |
| 1548 | IPI:IPI00968359.2 | Slc6a9 Isoform GlyT-1C of Sodium- and chloride-dependent glycine transporter 1                    | 6.87 | 6.503 | 4 |
| 1549 | IPI:IPI00127598.1 | Atpif1 ATPase inhibitor, mitochondrial                                                            | 6.87 | 23.58 | 5 |
| 1550 | IPI:IPI00127021.1 | Nedd8 NEDD8                                                                                       | 6.86 | 30.86 | 6 |
| 1551 | IPI:IPI00225732.4 | Lpcat1 Isoform 1 of Lysophosphatidylcholine acyltransferase 1                                     | 6.84 | 9.176 | 5 |
| 1552 | IPI:IPI00117168.3 | Dpy30 Protein dpy-30 homolog                                                                      | 6.84 | 47.47 | 5 |
| 1553 | IPI:IPI00111958.2 | Urod Uroporphyrinogen decarboxylase                                                               | 6.82 | 12.53 | 4 |
| 1554 | IPI:IPI00173138.1 | Pcif1 Phosphorylated CTD-interacting factor 1                                                     | 6.82 | 6.799 | 5 |
| 1555 | IPI:IPI00761513.1 | Faf2 Isoform 2 of FAS-associated factor 2                                                         | 6.82 | 15.49 | 4 |
| 1556 | IPI:IPI00119239.2 | Psmb6 Proteasome subunit beta type-6                                                              | 6.81 | 24.79 | 6 |
| 1557 | IPI:IPI00331332.6 | Ndufa5 NADH dehydrogenase [ubiquinone] 1 alpha subcomplex subunit 5                               | 6.8  | 63.79 | 5 |
| 1558 | IPI:IPI00754704.2 | Farsa Farsla protein                                                                              | 6.79 | 19.72 | 8 |
| 1559 | IPI:IPI00875944.1 | Pex5l 73 kDa protein                                                                              | 6.78 | 6.525 | 4 |
| 1560 | IPI:IPI00845675.1 | Pfn2 Isoform 3 of Profilin-2                                                                      | 6.77 | 38.46 | 7 |
| 1561 | IPI:IPI00124372.3 | Aldh9a1 4-trimethylaminobutyraldehyde dehydrogenase                                               | 6.75 | 7.915 | 5 |
| 1562 | IPI:IPI00956919.1 | Oxr1 Isoform 4 of Oxidation resistance protein 1                                                  | 6.72 | 9.654 | 6 |
| 1563 | IPI:IPI00124127.1 | Sms;Gm14680 Spermine synthase                                                                     | 6.72 | 13.93 | 3 |
| 1564 | IPI:IPI00874350.1 | Aldh3a2 Putative uncharacterized protein                                                          | 6.71 | 16.9  | 7 |
| 1565 | IPI:IPI00136251.1 | Dnaja2 DnaJ homolog subfamily A member 2                                                          | 6.71 | 17.48 | 6 |
| 1566 | IPI:IPI00850520.1 | LOC100045667 similar to Dopachrome tautomerase                                                    | 6.69 | 12.34 | 6 |
| 1567 | IPI:IPI00127941.1 | 1110004F10Rik Small acidic protein                                                                | 6.69 | 28.18 | 5 |
| 1568 | IPI:IPI00322267.5 | Adprhl2 Isoform 1 of Poly(ADP-ribose) glycohydrolase ARH3                                         | 6.67 | 12.43 | 4 |
| 1569 | IPI:IPI00230429.4 | Kpna3 Importin subunit alpha-3                                                                    | 6.65 | 12.09 | 4 |
| 1570 | IPI:IPI00553807.3 | Dlg1 Isoform 2 of Disks large homolog 1                                                           | 6.65 | 8.959 | 8 |
| 1571 | IPI:IPI00120089.1 | Klc4 Kinesin light chain 4                                                                        | 6.64 | 7.108 | 5 |
| 1572 | IPI:IPI00556700.2 | Eif3j Putative uncharacterized protein                                                            | 6.64 | 25.67 | 4 |
| 1573 | IPI:IPI00420426.1 | Ap3b2 AP-3 complex subunit beta-2                                                                 | 6.63 | 10.63 | 9 |
| 1574 | IPI:IPI00323624.3 | C3 Isoform Long of Complement C3 (Fragment)                                                       | 6.62 | 4.57  | 5 |
| 1575 | IPI:IPI00474970.2 | Gm9761;LOC100047744 similar to MGC89287 protein                                                   | 6.61 | 35.9  | 7 |
| 1576 | IPI:IPI00420870.4 | Ogt Isoform 1 of UDP-N-acetylglucosamine--peptide N-acetylglucosaminyltransferase 110 kDa subunit | 6.61 | 4.876 | 3 |
| 1577 | IPI:IPI00620804.2 | Klc1 Kinesin light chain 1T (Fragment)                                                            | 6.61 | 9.119 | 6 |
| 1578 | IPI:IPI00223060.1 | Pck2 phosphoenolpyruvate carboxykinase [GTP], mitochondrial                                       | 6.6  | 8.846 | 4 |



|      |                   |                                                                                |      |       |    |
|------|-------------------|--------------------------------------------------------------------------------|------|-------|----|
| 1579 | IPI:IPI00663627.1 | Flnb Filamin-B                                                                 | 6.57 | 4.535 | 9  |
| 1580 | IPI:IPI00387379.1 | Decr1 2,4-dienoyl-CoA reductase, mitochondrial                                 | 6.57 | 18.81 | 4  |
| 1581 | IPI:IPI00856488.1 | Sf1 Uncharacterized protein                                                    | 6.56 | 22.07 | 9  |
| 1582 | IPI:IPI00648315.1 | Rpl19 60S ribosomal protein L19 isoform 2                                      | 6.56 | 20.1  | 4  |
| 1583 | IPI:IPI00876069.1 | Ranbp3 52 kDa protein                                                          | 6.55 | 12.83 | 4  |
| 1584 | IPI:IPI00123505.2 | Syp Synaptophysin                                                              | 6.55 | 14.33 | 9  |
| 1585 | IPI:IPI00857642.1 | Puf60 Isoform 3 of Poly(U)-binding-splicing factor PUF60                       | 6.54 | 24.85 | 8  |
| 1586 | IPI:IPI00330862.5 | Ezr;LOC100044177 Ezrin                                                         | 6.53 | 25.77 | 20 |
| 1587 | IPI:IPI00153990.1 | Actr1b Beta-centractin                                                         | 6.52 | 38.83 | 14 |
| 1588 | IPI:IPI00134234.1 | Grifin Grifin                                                                  | 6.5  | 31.94 | 4  |
| 1589 | IPI:IPI00311948.3 | Sf3b5 Splicing factor 3B subunit 5                                             | 6.49 | 38.37 | 3  |
| 1590 | IPI:IPI00467854.1 | Clip2 Isoform 1 of CAP-Gly domain-containing linker protein 2                  | 6.49 | 3.438 | 3  |
| 1591 | IPI:IPI00396803.2 | Guca1a Guanylyl cyclase-activating protein 1                                   | 6.48 | 40.59 | 9  |
| 1592 | IPI:IPI00468605.4 | Nlgn2 Neuroligin-2                                                             | 6.48 | 8.254 | 6  |
| 1593 | IPI:IPI00111151.2 | Rph3a Rabphilin-3A                                                             | 6.48 | 8.517 | 4  |
| 1594 | IPI:IPI00649157.1 | Stmn1 Stathmin                                                                 | 6.48 | 42.16 | 7  |
| 1595 | IPI:IPI00380281.4 | Sf3a2 splicing factor 3A subunit 2                                             | 6.47 | 12.16 | 3  |
| 1596 | IPI:IPI00171974.1 | Chmp4b Charged multivesicular body protein 4b                                  | 6.47 | 22.32 | 5  |
| 1597 | IPI:IPI00894844.1 | Tulp1 Tubby like protein 1                                                     | 6.46 | 10.29 | 5  |
| 1598 | IPI:IPI00857621.1 | Snx3 Uncharacterized protein                                                   | 6.45 | 35    | 6  |
| 1599 | IPI:IPI00849678.1 | LOC100046972 similar to RNA-binding protein                                    | 6.44 | 23.55 | 9  |
| 1600 | IPI:IPI00227843.6 | Tpp2 Isoform Short of Tripeptidyl-peptidase 2                                  | 6.43 | 4.484 | 5  |
| 1601 | IPI:IPI00775775.1 | Gripap1 Gripap1 protein                                                        | 6.43 | 14.22 | 7  |
| 1602 | IPI:IPI00656221.1 | Supt5h Isoform 1 of Transcription elongation factor SPT5                       | 6.41 | 7.024 | 5  |
| 1603 | IPI:IPI00670400.2 | Apoo Putative uncharacterized protein                                          | 6.41 | 37.2  | 4  |
| 1604 | IPI:IPI00625950.2 | Aprt adenine phosphoribosyltransferase                                         | 6.4  | 23.89 | 4  |
| 1605 | IPI:IPI00626239.3 | Rpl11 Ribosomal protein L11                                                    | 6.39 | 20.44 | 4  |
| 1606 | IPI:IPI00133399.1 | Ndufa6 NADH dehydrogenase [ubiquinone] 1 alpha subcomplex subunit 6            | 6.36 | 39.69 | 5  |
| 1607 | IPI:IPI00223767.3 | Pank4 Isoform 2 of Pantothenate kinase 4                                       | 6.35 | 5.433 | 3  |
| 1608 | IPI:IPI00321647.2 | Eif3c Eukaryotic translation initiation factor 3 subunit C                     | 6.35 | 8.013 | 6  |
| 1609 | IPI:IPI00130102.4 | Des Desmin                                                                     | 6.34 | 24.95 | 21 |
| 1610 | IPI:IPI00894741.1 | Edc4 Uncharacterized protein                                                   | 6.34 | 8.649 | 6  |
| 1611 | IPI:IPI00889924.1 | Timm44 mitochondrial import inner membrane translocase subunit TIM44 precursor | 6.33 | 11.06 | 5  |
| 1612 | IPI:IPI00404707.1 | Rbm14 Isoform 1 of RNA-binding protein 14                                      | 6.33 | 7.175 | 5  |
| 1613 | IPI:IPI00459145.1 | Trmt112 MCG130245, isoform CRA_b                                               | 6.33 | 55.56 | 4  |
| 1614 | IPI:IPI00850737.1 | Mut methylmalonyl-CoA mutase, mitochondrial precursor                          | 6.33 | 10.43 | 5  |

|      |                   |                                                                   |      |       |    |
|------|-------------------|-------------------------------------------------------------------|------|-------|----|
| 1615 | IPI:IPI00118832.1 | Erp29 Endoplasmic reticulum resident protein 29                   | 6.32 | 13.36 | 4  |
| 1616 | IPI:IPI00828623.1 | Cd44 Isoform 4 of CD44 antigen                                    | 6.32 | 9.174 | 5  |
| 1617 | IPI:IPI00662342.3 | 1110020G09Rik Isoform 1 of UPF0465 protein C5orf33 homolog        | 6.31 | 18.81 | 6  |
| 1618 | IPI:IPI00123281.1 | Lrrc59 Leucine-rich repeat-containing protein 59                  | 6.31 | 16.29 | 3  |
| 1619 | IPI:IPI00971268.1 | Gm10362 similar to Rpl17 protein                                  | 6.31 | 15.83 | 5  |
| 1620 | IPI:IPI00265025.5 | Galk1 galactokinase                                               | 6.3  | 15.31 | 5  |
| 1621 | IPI:IPI00125493.5 | Mylk myosin light chain kinase, smooth muscle                     | 6.3  | 1.897 | 4  |
| 1622 | IPI:IPI00454050.1 | Supt6h Transcription elongation factor SPT6                       | 6.29 | 4.693 | 6  |
| 1623 | IPI:IPI00480414.2 | Rtn3 Isoform 2 of Reticulon-3                                     | 6.29 | 6.667 | 7  |
| 1624 | IPI:IPI00120066.5 | Prom1 Isoform 1 of Prominin-1                                     | 6.28 | 7.036 | 4  |
| 1625 | IPI:IPI00110588.4 | Msn Moesin                                                        | 6.27 | 26.52 | 17 |
| 1626 | IPI:IPI00653237.2 | Wdr7 Wdr7 protein                                                 | 6.27 | 6.177 | 5  |
| 1627 | IPI:IPI00172146.6 | Dhdh Trans-1,2-dihydrobenzene-1,2-diol dehydrogenase              | 6.27 | 27.03 | 6  |
| 1628 | IPI:IPI00653383.2 | Tnfaip3 tumor necrosis factor, alpha-induced protein 3 isoform 1  | 6.27 | 9.29  | 4  |
| 1629 | IPI:IPI00132250.1 | Eif3e Eukaryotic translation initiation factor 3 subunit E        | 6.27 | 9.663 | 3  |
| 1630 | IPI:IPI00750917.2 | Atp2b4 ATPase, Ca++ transporting, plasma membrane 4               | 6.27 | 14.91 | 17 |
| 1631 | IPI:IPI00890905.1 | Faim fas apoptotic inhibitory molecule 1 Faim-L                   | 6.27 | 18.41 | 4  |
| 1632 | IPI:IPI00880482.1 | Clasp1 CLIP-associating protein 1 isoform 2                       | 6.27 | 3.406 | 4  |
| 1633 | IPI:IPI00621975.2 | LOC100046698 similar to Probable ATP-dependent RNA helicase DDX46 | 6.24 | 6.141 | 5  |
| 1634 | IPI:IPI00457668.1 | Scfd1 Isoform 3 of Sec1 family domain-containing protein 1        | 6.24 | 9.045 | 3  |
| 1635 | IPI:IPI00228620.5 | Gnat2 Guanine nucleotide-binding protein G(t) subunit alpha-2     | 6.23 | 32.2  | 16 |
| 1636 | IPI:IPI00112032.2 | Carkd carbohydrate kinase domain-containing protein precursor     | 6.23 | 24.38 | 7  |
| 1637 | IPI:IPI00556768.1 | Thrap3 Thyroid hormone receptor-associated protein 3              | 6.23 | 5.258 | 3  |
| 1638 | IPI:IPI00336509.5 | Fam114a2 Isoform 1 of Protein FAM114A2                            | 6.23 | 14.08 | 5  |
| 1639 | IPI:IPI00648918.3 | Myo18a Isoform 4 of Myosin-XVIIIa                                 | 6.23 | 1.702 | 3  |
| 1640 | IPI:IPI00115650.4 | Cacybp Calcyclin-binding protein                                  | 6.22 | 38.43 | 6  |
| 1641 | IPI:IPI00318496.1 | Gad1 Glutamate decarboxylase 1                                    | 6.22 | 7.589 | 4  |
| 1642 | IPI:IPI00128240.5 | Selm Selenoprotein M                                              | 6.22 | 26.21 | 4  |
| 1643 | IPI:IPI00753932.1 | - similar to acidic ribosomal phosphoprotein P1 isoform 1         | 6.22 | 48.25 | 5  |
| 1644 | IPI:IPI00124639.1 | Nt5c 5'(3')-deoxyribonucleotidase, cytosolic type                 | 6.21 | 26    | 6  |
| 1645 | IPI:IPI00453771.2 | Ykt6 Synaptobrevin homolog YKT6                                   | 6.21 | 26.26 | 4  |
| 1646 | IPI:IPI00132206.2 | Dnajc5 DnaJ homolog subfamily C member 5                          | 6.2  | 54.55 | 8  |

|      |                        |                                                                           |      |       |    |
|------|------------------------|---------------------------------------------------------------------------|------|-------|----|
| 1647 | IPI:IPI00125807.3      | Mpi Mannose-6-phosphate isomerase                                         | 6.2  | 14.42 | 4  |
| 1648 | IPI:IPI00944047.1      | Prom1 prominin-1 isoform s8                                               | 6.19 | 12.71 | 7  |
| 1649 | IPI:IPI00124820.2      | Coro1c Coronin-1C                                                         | 6.19 | 16.46 | 6  |
| 1650 | IPI:IPI00121736.1      | Pdcd6 Programmed cell death protein 6                                     | 6.19 | 31.94 | 4  |
| 1651 | IPI:IPI00970354.1      | Ctnna2 Uncharacterized protein                                            | 6.19 | 12.53 | 11 |
| 1652 | IPI:IPI00111359.2      | Gsr Isoform Mitochondrial of Glutathione reductase, mitochondrial         | 6.18 | 9.4   | 3  |
| 1653 | IPI:IPI00117811.3      | Ap3d1 AP-3 complex subunit delta-1                                        | 6.18 | 6.839 | 4  |
| 1654 | IPI:IPI00153642.1      | Ubqln1 Isoform 1 of Ubiquilin-1                                           | 6.18 | 17.53 | 8  |
| 1655 | IPI:IPI00918348.1      | Pabpn1;Bcl2l2 Uncharacterized protein                                     | 6.18 | 38.22 | 6  |
| 1656 | IPI:IPI00420651.3      | Ppp1r9b Isoform 1 of Neurabin-2                                           | 6.17 | 6.977 | 5  |
| 1657 | IPI:IPI00876343.1      | Hip1r huntingtin-interacting protein 1-related protein                    | 6.17 | 5.524 | 5  |
| 1658 | IPI:IPI00222429.6      | Nomo1 Nodal modulator 1                                                   | 6.17 | 4.613 | 5  |
| 1659 | IPI:IPI00831423.1      | Tpm1 29 kDa protein                                                       | 6.17 | 37.5  | 14 |
| 1660 | IPI:IPI00405742.6      | Plxb2 plexin B2                                                           | 6.17 | 2.497 | 4  |
| 1661 | IPI:IPI00653398.1      | Flot2 Putative uncharacterized protein                                    | 6.16 | 10.31 | 3  |
| 1662 | IPI:IPI00877320.1      | Alpl alkaline phosphatase, tissue-nonspecific isozyme precursor           | 6.16 | 10.11 | 5  |
| 1663 | IPI:IPI00411097.2      | 2610101N10Rik Isoform 3 of U2-associated protein SR140                    | 6.15 | 4.772 | 4  |
| 1664 | IPI:IPI00315302.5      | Ndufa2 NADH dehydrogenase [ubiquinone] 1 alpha subcomplex subunit 2       | 6.15 | 25.25 | 4  |
| 1665 | IPI:IPI00749697.1      | Stam Signal transducing adaptor molecule (SH3 domain and ITAM motif) 1    | 6.15 | 11.04 | 4  |
| 1666 | IPI:IPI00222763.1      | Srsf7 Isoform 1 of Serine/arginine-rich splicing factor 7                 | 6.15 | 21.72 | 8  |
| 1667 | IPI:IPI00317356.1<br>0 | Pon1 Serum paraoxonase/arylesterase 1                                     | 6.15 | 13.8  | 4  |
| 1668 | IPI:IPI00857897.1      | Pspc1 Isoform 2 of Paraspeckle component 1                                | 6.15 | 12.23 | 4  |
| 1669 | IPI:IPI00928550.1      | Ggt7 gamma-glutamyltransferase 7                                          | 6.14 | 10.27 | 4  |
| 1670 | IPI:IPI00881462.1      | Fip1l1 Uncharacterized protein                                            | 6.14 | 10.57 | 3  |
| 1671 | IPI:IPI00420185.1      | Eps15l1 Isoform 1 of Epidermal growth factor receptor substrate 15-like 1 | 6.14 | 6.064 | 3  |
| 1672 | IPI:IPI00221540.1      | Erlin2 Erlin-2                                                            | 6.13 | 20.29 | 6  |
| 1673 | IPI:IPI00331602.1      | Kcnb1 Potassium voltage gated channel, Shab-related subfamily, member 1   | 6.13 | 7.701 | 4  |
| 1674 | IPI:IPI00830853.1      | 2610101N10Rik Isoform 1 of U2-associated protein SR140                    | 6.13 | 3.693 | 3  |
| 1675 | IPI:IPI00885725.1      | Cpne1 Protein                                                             | 6.12 | 4.912 | 3  |
| 1676 | IPI:IPI00263899.6      | Nqo1 NAD(P)H dehydrogenase [quinone] 1                                    | 6.12 | 14.23 | 4  |
| 1677 | IPI:IPI00170164.5      | Rgs9bp Regulator of G-protein signaling 9-binding protein                 | 6.12 | 19.41 | 3  |
| 1678 | IPI:IPI00309322.3      | Hmox2 Heme oxygenase 2                                                    | 6.12 | 19.05 | 5  |

|      |                   |                                                                    |      |       |    |
|------|-------------------|--------------------------------------------------------------------|------|-------|----|
| 1679 | IPI:IPI00831371.1 | D2hgdh 61 kDa protein                                              | 6.11 | 11.49 | 5  |
| 1680 | IPI:IPI00831305.1 | Pcp4;lgsf5 Uncharacterized protein                                 | 6.11 | 20.3  | 13 |
| 1681 | IPI:IPI00221817.5 | Vwa5a von Willebrand factor A domain-containing protein 5A         | 6.11 | 6.179 | 4  |
| 1682 | IPI:IPI00880252.1 | Serpinh1 serpin H1 precursor                                       | 6.11 | 15.11 | 4  |
| 1683 | IPI:IPI00114862.1 | Thumpd1;LOC100048066 THUMP domain-containing protein 1             | 6.1  | 11.71 | 3  |
| 1684 | IPI:IPI00775790.1 | Fhl1 Four and a half LIM domains 1                                 | 6.1  | 12.94 | 5  |
| 1685 | IPI:IPI00331165.2 | Synpr Isoform 2 of Synaptopodin                                    | 6.1  | 17.89 | 5  |
| 1686 | IPI:IPI00625729.2 | Krt1 Keratin, type II cytoskeletal 1                               | 6.1  | 13.66 | 8  |
| 1687 | IPI:IPI00275455.2 | Rps18-ps3;LOC100047828 similar to ribosomal protein isoform 1      | 6.1  | 20.98 | 4  |
| 1688 | IPI:IPI00314844.2 | Twf1 Twinfilin-1                                                   | 6.09 | 15.71 | 4  |
| 1689 | IPI:IPI00124790.1 | Reep6 Isoform 1 of Receptor expression-enhancing protein 6         | 6.09 | 15.42 | 4  |
| 1690 | IPI:IPI00318048.5 | Nop56 Nucleolar protein 56                                         | 6.09 | 6.552 | 3  |
| 1691 | IPI:IPI00135969.2 | Adss Adenylosuccinate synthetase isozyme 2                         | 6.09 | 13.6  | 4  |
| 1692 | IPI:IPI00652781.3 | Camk1d Putative uncharacterized protein                            | 6.08 | 13.06 | 4  |
| 1693 | IPI:IPI00230338.3 | Dbn1 Isoform A2 of Drebrin                                         | 6.08 | 15.22 | 4  |
| 1694 | IPI:IPI00465946.1 | Fam98b Protein FAM98B                                              | 6.08 | 12.12 | 3  |
| 1695 | IPI:IPI00123202.1 | Atxn10 Ataxin-10                                                   | 6.08 | 11.37 | 4  |
| 1696 | IPI:IPI00626620.2 | Sec24c Sec24 related gene family, member C isoform 2               | 6.08 | 6.471 | 4  |
| 1697 | IPI:IPI00121151.1 | Ubxn6 Isoform 1 of UBX domain-containing protein 6                 | 6.08 | 10.18 | 3  |
| 1698 | IPI:IPI00671398.1 | - similar to ribosomal protein S8 isoform 1                        | 6.08 | 19.23 | 4  |
| 1699 | IPI:IPI00876084.1 | Gpd2 Glycerol-3-phosphate dehydrogenase, mitochondrial             | 6.07 | 14.44 | 7  |
| 1700 | IPI:IPI00137736.1 | Gm10443;Rps28 40S ribosomal protein S28                            | 6.07 | 30.43 | 4  |
| 1701 | IPI:IPI00135512.1 | Cnpy2 Protein canopy homolog 2                                     | 6.07 | 28.02 | 4  |
| 1702 | IPI:IPI00112641.2 | Sep15 15 kDa selenoprotein                                         | 6.07 | 17.9  | 5  |
| 1703 | IPI:IPI00113052.1 | Tsfm Elongation factor Ts, mitochondrial                           | 6.07 | 19.14 | 3  |
| 1704 | IPI:IPI00650029.1 | Sparc Secreted acidic cysteine rich glycoprotein                   | 6.07 | 15.28 | 3  |
| 1705 | IPI:IPI00117146.1 | Psph Phosphoserine phosphatase                                     | 6.07 | 15.56 | 3  |
| 1706 | IPI:IPI00857048.1 | Nagk Putative uncharacterized protein                              | 6.06 | 12.47 | 3  |
| 1707 | IPI:IPI00648654.1 | Dusp3 Dual specificity phosphatase 3                               | 6.06 | 20    | 4  |
| 1708 | IPI:IPI00877182.1 | Capza1 F-actin-capping protein subunit alpha-1                     | 6.06 | 23.43 | 8  |
| 1709 | IPI:IPI00453798.3 | Tmx3 Protein disulfide-isomerase TMX3                              | 6.06 | 7.237 | 4  |
| 1710 | IPI:IPI00757372.2 | Isoc2a Isochorismatase domain-containing protein 2A, mitochondrial | 6.06 | 35.92 | 5  |
| 1711 | IPI:IPI00120270.2 | Tnfaip3 tumor necrosis factor, alpha-induced protein 3 isoform 2   | 6.06 | 8.867 | 4  |
| 1712 | IPI:IPI00330903.3 | Pank4 Isoform 1 of Pantothenate kinase 4                           | 6.06 | 4.756 | 4  |

|      |                   |                                                                            |      |       |    |
|------|-------------------|----------------------------------------------------------------------------|------|-------|----|
| 1713 | IPI:IPI00776358.1 | Acat3 acetyl-Coenzyme A acetyltransferase 3                                | 6.06 | 21.41 | 7  |
| 1714 | IPI:IPI00230449.7 | Hpcal1 Hippocalcin-like protein 1                                          | 6.05 | 46.11 | 9  |
| 1715 | IPI:IPI00406639.2 | Ampd2 AMP deaminase 2                                                      | 6.05 | 5.013 | 4  |
| 1716 | IPI:IPI00139259.1 | Tra2b Isoform 1 of Transformer-2 protein homolog beta                      | 6.05 | 15.97 | 5  |
| 1717 | IPI:IPI00263042.3 | Naa38 N-alpha-acetyltransferase 38, NatC auxiliary subunit                 | 6.05 | 59.38 | 4  |
| 1718 | IPI:IPI00882339.1 | Nmral1 Uncharacterized protein                                             | 6.05 | 14.38 | 5  |
| 1719 | IPI:IPI00118569.1 | Gna13 Guanine nucleotide-binding protein subunit alpha-13                  | 6.05 | 14.06 | 9  |
| 1720 | IPI:IPI00123802.5 | Hsph1 Isoform HSP105-alpha of Heat shock protein 105 kDa                   | 6.05 | 5.828 | 5  |
| 1721 | IPI:IPI00309262.3 | Cdk5 Cell division protein kinase 5                                        | 6.04 | 18.15 | 5  |
| 1722 | IPI:IPI00515257.1 | Btf3 Isoform 1 of Transcription factor BTF3                                | 6.04 | 38.73 | 3  |
| 1723 | IPI:IPI00312752.3 | Sh3gl1 Endophilin-A2                                                       | 6.04 | 17.93 | 7  |
| 1724 | IPI:IPI00608064.1 | Fech Fech protein (Fragment)                                               | 6.04 | 13.03 | 4  |
| 1725 | IPI:IPI00132412.3 | Mrpl10 39S ribosomal protein L10, mitochondrial                            | 6.04 | 21.76 | 4  |
| 1726 | IPI:IPI00406193.4 | Iqgap2 Ras GTPase-activating-like protein IQGAP2                           | 6.04 | 2.603 | 4  |
| 1727 | IPI:IPI00830581.1 | Hsd17b10 3-hydroxyacyl-CoA dehydrogenase type-2                            | 6.03 | 38.31 | 5  |
| 1728 | IPI:IPI00224570.3 | Prkar2b cAMP-dependent protein kinase type II-beta regulatory subunit      | 6.03 | 16.59 | 9  |
| 1729 | IPI:IPI00130118.1 | Rab10 Ras-related protein Rab-10                                           | 6.03 | 33.5  | 8  |
| 1730 | IPI:IPI00830189.2 | Scly Isoform 1 of Selenocysteine lyase                                     | 6.03 | 10.65 | 3  |
| 1731 | IPI:IPI00138089.4 | Lrrc47 Leucine-rich repeat-containing protein 47                           | 6.03 | 6.713 | 3  |
| 1732 | IPI:IPI00352475.3 | Pdap1 28 kDa heat- and acid-stable phosphoprotein                          | 6.03 | 16.57 | 3  |
| 1733 | IPI:IPI00133591.1 | Vps28 Vacuolar protein sorting-associated protein 28 homolog               | 6.03 | 27.15 | 5  |
| 1734 | IPI:IPI00123891.3 | Csrp1 Cysteine and glycine-rich protein 1                                  | 6.03 | 36.79 | 4  |
| 1735 | IPI:IPI00753915.2 | LOC674706 similar to Zinc finger protein 341                               | 6.03 | 3.346 | 3  |
| 1736 | IPI:IPI00876489.1 | Sirpa tyrosine-protein phosphatase non-receptor type substrate 1 isoform 1 | 6.03 | 10.22 | 3  |
| 1737 | IPI:IPI00119180.1 | Ppp5c Serine/threonine-protein phosphatase 5                               | 6.03 | 12.83 | 4  |
| 1738 | IPI:IPI00875998.1 | Uck1 Uridine-cytidine kinase 1                                             | 6.03 | 18.77 | 3  |
| 1739 | IPI:IPI00930754.1 | Sept2 septin-2 b                                                           | 6.03 | 21.5  | 5  |
| 1740 | IPI:IPI00762803.1 | Atp5l-ps1 Uncharacterized protein                                          | 6.03 | 35.92 | 3  |
| 1741 | IPI:IPI00132692.2 | Magoh-rs1 protein mago nashi homolog 1-related                             | 6.03 | 29.05 | 3  |
| 1742 | IPI:IPI00944126.1 | Tpm1 tropomyosin alpha-1 chain isoform 8                                   | 6.02 | 40.73 | 15 |
| 1743 | IPI:IPI00263028.1 | Cdkn2aip CDKN2A-interacting protein                                        | 6.02 | 7.105 | 3  |
| 1744 | IPI:IPI00338302.1 | Pgm1;Pgm2 Phosphoglucomutase-2                                             | 6.02 | 6.935 | 3  |
| 1745 | IPI:IPI00420346.3 | Smug1 Single-strand selective monofunctional uracil DNA glycosylase        | 6.02 | 18.28 | 3  |
| 1746 | IPI:IPI00317701.2 | Cops7a Isoform 2 of COP9 signalosome complex                               | 6.02 | 17.69 | 3  |

|      |                   |                                                                                         |      |       |   |
|------|-------------------|-----------------------------------------------------------------------------------------|------|-------|---|
|      |                   | subunit 7a                                                                              |      |       |   |
| 1747 | IPI:IPI00132959.1 | Hddc3 HD domain-containing protein 3                                                    | 6.02 | 24.58 | 3 |
| 1748 | IPI:IPI00760011.1 | Snx6 Putative uncharacterized protein                                                   | 6.02 | 7.389 | 3 |
| 1749 | IPI:IPI00928109.1 | Apex1 32 kDa protein                                                                    | 6.02 | 19.03 | 4 |
| 1750 | IPI:IPI00223759.2 | Vps26b Isoform 1 of Vacuolar protein sorting-associated protein 26B                     | 6.02 | 12.5  | 4 |
| 1751 | IPI:IPI00742413.1 | Prpf31 Isoform 3 of U4/U6 small nuclear ribonucleoprotein Prp31                         | 6.02 | 11.11 | 3 |
| 1752 | IPI:IPI00329953.1 | Stx7 Syntaxin-7                                                                         | 6.02 | 21.07 | 3 |
| 1753 | IPI:IPI00124212.2 | Ccdc136 coiled-coil domain-containing protein 136                                       | 6.02 | 3.707 | 3 |
| 1754 | IPI:IPI00121300.1 | Msi1 Isoform 1 of RNA-binding protein Musashi homolog 1                                 | 6.01 | 16.02 | 8 |
| 1755 | IPI:IPI00970258.1 | - ENH isoform 1e                                                                        | 6.01 | 9.446 | 3 |
| 1756 | IPI:IPI00115190.1 | Pde6d Retinal rod rhodopsin-sensitive cGMP 3',5'-cyclic phosphodiesterase subunit delta | 6.01 | 25.33 | 3 |
| 1757 | IPI:IPI00120671.2 | Isca2 Iron-sulfur cluster assembly 2 homolog, mitochondrial                             | 6.01 | 31.17 | 4 |
| 1758 | IPI:IPI00173160.3 | Rps27 40S ribosomal protein S27                                                         | 6.01 | 39.29 | 4 |
| 1759 | IPI:IPI00118795.1 | Csnk2a2 Casein kinase II subunit alpha'                                                 | 6.01 | 14    | 6 |
| 1760 | IPI:IPI00331463.1 | Atpif1 ATPase inhibitor, mitochondrial precursor                                        | 6.01 | 33.96 | 4 |
| 1761 | IPI:IPI00109791.3 | Cygb Cytoglobin                                                                         | 6.01 | 24.21 | 4 |
| 1762 | IPI:IPI00137601.2 | Taco1 Translational activator of cytochrome c oxidase 1                                 | 6.01 | 17.69 | 3 |
| 1763 | IPI:IPI00875866.1 | Dnajc5 23 kDa protein                                                                   | 6.01 | 19.61 | 4 |
| 1764 | IPI:IPI00136618.1 | Tollip Toll-interacting protein                                                         | 6.01 | 20.07 | 5 |
| 1765 | IPI:IPI00874578.1 | Gm5097 Uncharacterized protein                                                          | 6.01 | 14.17 | 3 |
| 1766 | IPI:IPI00466820.4 | Rps8;Gm15501 40S ribosomal protein S8                                                   | 6    | 34.62 | 7 |
| 1767 | IPI:IPI00649303.3 | Abca8a ATP-binding cassette, sub-family A (ABC1), member 8a                             | 6    | 44.08 | 9 |
| 1768 | IPI:IPI00132276.1 | Vamp3 Vesicle-associated membrane protein 3                                             | 6    | 44.66 | 9 |
| 1769 | IPI:IPI00221788.3 | Hpcal4 Hippocalcin-like protein 4                                                       | 6    | 35.08 | 7 |
| 1770 | IPI:IPI00331528.9 | Glrx Glutaredoxin-1                                                                     | 6    | 30.84 | 4 |
| 1771 | IPI:IPI00341869.5 | Nucks1 Nuclear ubiquitous casein and cyclin-dependent kinases substrate                 | 6    | 18.8  | 3 |
| 1772 | IPI:IPI00228236.6 | Spcs2 Signal peptidase complex subunit 2                                                | 6    | 16.37 | 3 |
| 1773 | IPI:IPI00111117.5 | Arpc5l Actin-related protein 2/3 complex subunit 5-like protein                         | 6    | 45.1  | 5 |
| 1774 | IPI:IPI00653664.2 | Enoph1 Isoform 1 of Enolase-phosphatase E1                                              | 6    | 19.46 | 3 |
| 1775 | IPI:IPI00331014.1 | 4930572J05Rik UPF0670 protein C8orf55 homolog                                           | 6    | 25.12 | 4 |
| 1776 | IPI:IPI00944702.1 | Tsr2 pre-rRNA-processing protein TSR2 homolog isoform 1                                 | 6    | 25.13 | 4 |
| 1777 | IPI:IPI00944162.1 | U2af1 splicing factor U2AF 35 kDa subunit isoform 2                                     | 6    | 29.29 | 6 |
| 1778 | IPI:IPI00648763.1 | Ddx5 DEAD (Asp-Glu-Ala-Asp) box polypeptide 5                                           | 6    | 39.89 | 9 |

|      |                   |                                                                      |      |       |    |
|------|-------------------|----------------------------------------------------------------------|------|-------|----|
| 1779 | IPI:IPI00134378.9 | Tmed7 transmembrane emp24 protein transport domain containing 7      | 6    | 18.3  | 4  |
| 1780 | IPI:IPI00331251.1 | Acads Putative uncharacterized protein                               | 6    | 14.81 | 3  |
| 1781 | IPI:IPI00471077.3 | Txndc17 Thioredoxin domain-containing protein 17                     | 6    | 28.46 | 3  |
| 1782 | IPI:IPI00114377.1 | Cox7a2 Cytochrome c oxidase subunit 7A2, mitochondrial               | 6    | 37.35 | 6  |
| 1783 | IPI:IPI00331241.8 | Gsta3 Glutathione S-transferase A3                                   | 6    | 18.55 | 5  |
| 1784 | IPI:IPI00885860.1 | Apoc3 15 kDa protein                                                 | 6    | 35.04 | 3  |
| 1785 | IPI:IPI00776162.3 | Eif4g2 eukaryotic translation initiation factor 4 gamma 2 isoform 1  | 6    | 5.188 | 4  |
| 1786 | IPI:IPI00378187.2 | Rbm3 putative RNA-binding protein 3 isoform 1                        | 6    | 38.96 | 4  |
| 1787 | IPI:IPI00127987.1 | Arpc1a Actin-related protein 2/3 complex subunit 1A                  | 6    | 10.81 | 3  |
| 1788 | IPI:IPI00119116.1 | Ppox Protoporphyrinogen oxidase                                      | 6    | 11.95 | 3  |
| 1789 | IPI:IPI00322263.2 | Rbm12 RNA-binding protein 12                                         | 5.99 | 2.823 | 3  |
| 1790 | IPI:IPI00136701.1 | Actn3 Alpha-actinin-3                                                | 5.97 | 14.22 | 13 |
| 1791 | IPI:IPI00351206.5 | Pgrmc2 Membrane-associated progesterone receptor component 2         | 5.96 | 27.65 | 5  |
| 1792 | IPI:IPI00407413.2 | Scand3 SCAN domain containing 3                                      | 5.95 | 6.217 | 4  |
| 1793 | IPI:IPI00135604.5 | Pcsk1n ProSAAS                                                       | 5.95 | 13.95 | 3  |
| 1794 | IPI:IPI00111235.2 | Aldh3a2 Fatty aldehyde dehydrogenase variant form                    | 5.95 | 11.44 | 6  |
| 1795 | IPI:IPI00153468.1 | Tmed4 Transmembrane emp24 domain-containing protein 4                | 5.94 | 23.79 | 7  |
| 1796 | IPI:IPI00117416.1 | Cox4nb Neighbor of COX4                                              | 5.93 | 20.29 | 3  |
| 1797 | IPI:IPI00762774.2 | Eif3d Eukaryotic translation initiation factor 3 subunit D           | 5.93 | 7.299 | 3  |
| 1798 | IPI:IPI00856164.1 | Eif4g1 Putative uncharacterized protein                              | 5.92 | 3.653 | 4  |
| 1799 | IPI:IPI00273232.6 | Spag7;LOC100048812 Sperm-associated antigen 7                        | 5.92 | 28.63 | 5  |
| 1800 | IPI:IPI00759876.2 | Comt1 catechol O-methyltransferase                                   | 5.92 | 21.51 | 4  |
| 1801 | IPI:IPI00874800.1 | Akr1e1 Uncharacterized protein                                       | 5.91 | 13.92 | 3  |
| 1802 | IPI:IPI00749628.1 | Gm9104 ribosomal protein L21-like                                    | 5.91 | 30.63 | 4  |
| 1803 | IPI:IPI00230365.5 | Krt17 Keratin, type I cytoskeletal 17                                | 5.91 | 4.157 | 3  |
| 1804 | IPI:IPI00131896.1 | Brp44 Brain protein 44                                               | 5.9  | 25.98 | 3  |
| 1805 | IPI:IPI00311335.5 | Papss1 Bifunctional 3'-phosphoadenosine 5'-phosphosulfate synthase 1 | 5.89 | 8.173 | 3  |
| 1806 | IPI:IPI00886250.1 | Tollip Toll interacting protein, isoform CRA_b                       | 5.88 | 18.54 | 3  |
| 1807 | IPI:IPI00114017.2 | Anxa7 annexin A7                                                     | 5.88 | 6.911 | 5  |
| 1808 | IPI:IPI00889927.2 | Ubap2l ubiquitin-associated protein 2-like isoform 6                 | 5.87 | 4.374 | 3  |
| 1809 | IPI:IPI00403802.1 | Impg2 Isoform 1 of Interphotoreceptor matrix proteoglycan 2          | 5.87 | 3.781 | 5  |

|      |                   |                                                                                  |      |       |   |
|------|-------------------|----------------------------------------------------------------------------------|------|-------|---|
| 1810 | IPI:IPI00828649.1 | Dnajc11 dnaJ homolog subfamily C member 11                                       | 5.86 | 6.798 | 3 |
| 1811 | IPI:IPI00133537.1 | Cdkn1b Cyclin-dependent kinase inhibitor 1B                                      | 5.85 | 26.4  | 4 |
| 1812 | IPI:IPI00830509.1 | Tnni2 Troponin I, skeletal, fast 2                                               | 5.84 | 23.7  | 3 |
| 1813 | IPI:IPI00331016.1 | Sec24b Sec24 related gene family, member B                                       | 5.83 | 5.276 | 4 |
| 1814 | IPI:IPI00115668.1 | Dpm1 Dolichol-phosphate mannosyltransferase                                      | 5.83 | 10.38 | 3 |
| 1815 | IPI:IPI00123465.1 | Cops7a Isoform 1 of COP9 signalosome complex subunit 7a                          | 5.83 | 15.64 | 4 |
| 1816 | IPI:IPI00894786.1 | Lancl1 LanC (Bacterial lantibiotic synthetase component C)-like 1, isoform CRA_a | 5.82 | 12.03 | 4 |
| 1817 | IPI:IPI00127983.1 | Gm10698;Tmed2 Transmembrane emp24 domain-containing protein 2                    | 5.81 | 18.41 | 4 |
| 1818 | IPI:IPI00128416.3 | Crygn Gamma-crystallin N                                                         | 5.81 | 23.5  | 4 |
| 1819 | IPI:IPI00322749.3 | Snrpd1 Small nuclear ribonucleoprotein Sm D1                                     | 5.8  | 36.97 | 3 |
| 1820 | IPI:IPI00322617.1 | Ncam2 Isoform Short of Neural cell adhesion molecule 2                           | 5.79 | 8.391 | 4 |
| 1821 | IPI:IPI00170084.1 | Appl1 DCC-interacting protein 13-alpha                                           | 5.79 | 9.618 | 4 |
| 1822 | IPI:IPI00453829.3 | Tmx4 Thioredoxin-related transmembrane protein 4                                 | 5.79 | 12.84 | 4 |
| 1823 | IPI:IPI00807902.1 | Mtch2 Mtch2 protein (Fragment)                                                   | 5.79 | 18.73 | 4 |
| 1824 | IPI:IPI00165731.3 | Abhd12 Monoacylglycerol lipase ABHD12                                            | 5.78 | 11.06 | 3 |
| 1825 | IPI:IPI00626793.3 | Cacna2d1 Isoform 2A of Voltage-dependent calcium channel subunit alpha-2/delta-1 | 5.78 | 4.714 | 4 |
| 1826 | IPI:IPI00173248.2 | Ank3 ankyrin 3, epithelial isoform a                                             | 5.77 | 6.025 | 7 |
| 1827 | IPI:IPI00663582.1 | LOC631751 similar to 40S ribosomal protein S14                                   | 5.77 | 33.11 | 4 |
| 1828 | IPI:IPI00402982.2 | Tmod2 Isoform 1 of Tropomodulin-2                                                | 5.76 | 20.51 | 4 |
| 1829 | IPI:IPI00318898.3 | Pgm3 Putative uncharacterized protein                                            | 5.76 | 10.22 | 5 |
| 1830 | IPI:IPI00652784.1 | Kif21a Putative uncharacterized protein                                          | 5.76 | 7.624 | 4 |
| 1831 | IPI:IPI00139301.3 | Krt5 Keratin, type II cytoskeletal 5                                             | 5.76 | 7.069 | 7 |
| 1832 | IPI:IPI00776307.2 | Cask Isoform 4 of Peripheral plasma membrane protein CASK                        | 5.75 | 6.167 | 6 |
| 1833 | IPI:IPI00454143.3 | Sept11 Isoform 2 of Septin-11                                                    | 5.74 | 10.02 | 4 |
| 1834 | IPI:IPI00323166.2 | Nnt NAD(P) transhydrogenase, mitochondrial                                       | 5.74 | 3.867 | 4 |
| 1835 | IPI:IPI00323819.3 | Rps20 40S ribosomal protein S20                                                  | 5.72 | 30.25 | 4 |
| 1836 | IPI:IPI00126551.1 | Diras2 GTP-binding protein Di-Ras2                                               | 5.71 | 18.59 | 3 |
| 1837 | IPI:IPI00224210.5 | Uqcrcq Cytochrome b-c1 complex subunit 8                                         | 5.71 | 39.02 | 6 |
| 1838 | IPI:IPI00112138.1 | Mdp1 Magnesium-dependent phosphatase 1                                           | 5.7  | 24.39 | 4 |
| 1839 | IPI:IPI00224128.7 | Nmt1 Glycylpeptide N-tetradecanoyltransferase 1                                  | 5.7  | 9.879 | 3 |
| 1840 | IPI:IPI00130381.1 | Bat3 Large proline-rich protein BAT3                                             | 5.7  | 6.932 | 4 |
| 1841 | IPI:IPI00849108.1 | LOC100044719;LOC100048366 similar to G protein gamma-5 subunit                   | 5.7  | 48.53 | 6 |
| 1842 | IPI:IPI00751399.2 | Ubxn7 UBX domain-containing protein 7                                            | 5.7  | 7.566 | 3 |
| 1843 | IPI:IPI00135596.1 | Kcnb1 Potassium voltage-gated channel subfamily B member 1                       | 5.7  | 6.534 | 3 |



|      |                   |                                                                                         |      |       |   |
|------|-------------------|-----------------------------------------------------------------------------------------|------|-------|---|
| 1844 | IPI:IPI00115490.1 | Pcyt1a Choline-phosphate cytidylyltransferase A                                         | 5.69 | 12.26 | 3 |
| 1845 | IPI:IPI00876176.1 | Ppm1b Isoform Beta-1 of Protein phosphatase 1B                                          | 5.68 | 13.08 | 4 |
| 1846 | IPI:IPI00720073.1 | Cd44 Isoform 13 of CD44 antigen                                                         | 5.66 | 9.366 | 3 |
| 1847 | IPI:IPI00882287.1 | Etfdh Etfdh protein                                                                     | 5.66 | 12.05 | 4 |
| 1848 | IPI:IPI00133734.1 | Pde6g Retinal rod rhodopsin-sensitive cGMP 3',5'-cyclic phosphodiesterase subunit gamma | 5.64 | 47.13 | 4 |
| 1849 | IPI:IPI00118963.1 | Mrpl12 39S ribosomal protein L12, mitochondrial                                         | 5.64 | 31.34 | 4 |
| 1850 | IPI:IPI00943403.1 | Flot2 Isoform 2 of Flotillin-2                                                          | 5.63 | 15.42 | 4 |
| 1851 | IPI:IPI00139364.1 | Srsf4 Serine/arginine-rich splicing factor 4                                            | 5.62 | 15.75 | 9 |
| 1852 | IPI:IPI00849514.1 | LOC669787 similar to avenall                                                            | 5.6  | 9.129 | 4 |
| 1853 | IPI:IPI00406624.2 | Mgea5 Isoform 3 of Bifunctional protein NCOAT                                           | 5.58 | 4.927 | 4 |
| 1854 | IPI:IPI00135475.3 | Dbn1 Isoform A of Drebrin                                                               | 5.58 | 5.807 | 3 |
| 1855 | IPI:IPI00648318.1 | Ak2 Isoform 1 of Adenylate kinase 2, mitochondrial                                      | 5.57 | 22.18 | 5 |
| 1856 | IPI:IPI00109932.1 | Ddx6 Probable ATP-dependent RNA helicase DDX6                                           | 5.57 | 10.35 | 5 |
| 1857 | IPI:IPI00331507.9 | Cul5 cullin-5 isoform 1                                                                 | 5.57 | 9.006 | 6 |
| 1858 | IPI:IPI00652233.1 | Cspg5 Isoform 2 of Chondroitin sulfate proteoglycan 5                                   | 5.56 | 8.72  | 4 |
| 1859 | IPI:IPI00877259.1 | Hmbs porphobilinogen deaminase isoform 2                                                | 5.56 | 13.66 | 3 |
| 1860 | IPI:IPI00266699.1 | Aplp2 amyloid-like protein 2 isoform a                                                  | 5.56 | 5.992 | 3 |
| 1861 | IPI:IPI00885811.1 | Arl8a Protein                                                                           | 5.55 | 32.73 | 3 |
| 1862 | IPI:IPI00132217.1 | Fis1 Mitochondrial fission 1 protein                                                    | 5.53 | 30.26 | 4 |
| 1863 | IPI:IPI00817040.1 | Eif4g2 eukaryotic translation initiation factor 4 gamma 2 isoform 2                     | 5.52 | 6.452 | 6 |
| 1864 | IPI:IPI00138232.4 | Gprin1 G protein-regulated inducer of neurite outgrowth 1                               | 5.52 | 5.15  | 3 |
| 1865 | IPI:IPI00556850.1 | Acp1 acid phosphatase 1, soluble isoform 1                                              | 5.51 | 27.85 | 3 |
| 1866 | IPI:IPI00116697.1 | Rab6 Isoform 1 of Ras-related protein Rab-6A                                            | 5.49 | 31.73 | 5 |
| 1867 | IPI:IPI00462482.3 | Uap1l1 Isoform 1 of UDP-N-acetylhexosamine pyrophosphorylase-like protein 1             | 5.48 | 8.284 | 3 |
| 1868 | IPI:IPI00129479.3 | Pip4k2c Phosphatidylinositol-5-phosphate 4-kinase type-2 gamma                          | 5.48 | 8.551 | 3 |
| 1869 | IPI:IPI00466384.6 | 8030462N17Rik RIKEN cDNA 8030462N17, isoform CRA_a                                      | 5.47 | 7.519 | 3 |
| 1870 | IPI:IPI00677102.1 | LOC638399 hypothetical protein isoform 1                                                | 5.46 | 33.87 | 4 |
| 1871 | IPI:IPI00453531.2 | Prune Protein prune homolog                                                             | 5.43 | 11.45 | 3 |
| 1872 | IPI:IPI00123817.1 | Atp6v1g2 V-type proton ATPase subunit G 2                                               | 5.43 | 39.83 | 5 |
| 1873 | IPI:IPI00762919.2 | Hip1 Huntingtin-interacting protein 1                                                   | 5.43 | 5.831 | 3 |
| 1874 | IPI:IPI00828470.1 | Acp1 Isoform 2 of Low molecular weight phosphotyrosine protein phosphatase              | 5.43 | 27.85 | 3 |
| 1875 | IPI:IPI00114818.1 | Sec14l2 SEC14-like protein 2                                                            | 5.42 | 11.91 | 5 |
| 1876 | IPI:IPI00173157.4 | 2310003F16Rik Isoform 1 of Huntingtin-interacting protein K                             | 5.4  | 36.43 | 3 |
| 1877 | IPI:IPI00223216.5 | Tst Thiosulfate sulfurtransferase                                                       | 5.4  | 13.13 | 3 |

|      |                   |                                                                                             |      |       |    |
|------|-------------------|---------------------------------------------------------------------------------------------|------|-------|----|
| 1878 | IPI:IPI00131228.1 | Pmm2 Phosphomannomutase 2                                                                   | 5.39 | 11.16 | 3  |
| 1879 | IPI:IPI00756703.1 | Ppp3ca Isoform 2 of Serine/threonine-protein phosphatase 2B catalytic subunit alpha isoform | 5.39 | 8.023 | 3  |
| 1880 | IPI:IPI00761620.1 | Srrt Isoform B of Serrate RNA effector molecule homolog                                     | 5.38 | 10.68 | 7  |
| 1881 | IPI:IPI00816946.1 | Gphn gephyrin isoform 1                                                                     | 5.36 | 13.34 | 8  |
| 1882 | IPI:IPI00118736.3 | Ppm1b protein phosphatase 1B isoform 1                                                      | 5.36 | 13.42 | 5  |
| 1883 | IPI:IPI00798468.1 | Usp9x Ubiquitin carboxyl-terminal hydrolase                                                 | 5.36 | 2.111 | 7  |
| 1884 | IPI:IPI00830901.1 | 4930583H14Rik Uncharacterized protein                                                       | 5.35 | 26.12 | 3  |
| 1885 | IPI:IPI00120232.1 | Ndufs7 NADH dehydrogenase [ubiquinone] iron-sulfur protein 7, mitochondrial                 | 5.34 | 14.73 | 3  |
| 1886 | IPI:IPI00407665.3 | Fuk L-fucose kinase short variant                                                           | 5.34 | 5.79  | 3  |
| 1887 | IPI:IPI00649191.2 | Psme3 Proteasome (Prosome, macropain) 28 subunit, 3                                         | 5.33 | 20.38 | 5  |
| 1888 | IPI:IPI00153234.2 | Pycrl Pyrroline-5-carboxylate reductase 3                                                   | 5.33 | 16.79 | 3  |
| 1889 | IPI:IPI00624863.1 | Paics Putative uncharacterized protein                                                      | 5.33 | 10.82 | 4  |
| 1890 | IPI:IPI00956860.1 | Gsr Putative uncharacterized protein (Fragment)                                             | 5.32 | 9.731 | 3  |
| 1891 | IPI:IPI00850054.1 | LOC100045567 similar to purine nucleoside phosphorylase                                     | 5.32 | 26.88 | 5  |
| 1892 | IPI:IPI00654180.1 | Ppp2r5e Putative uncharacterized protein                                                    | 5.31 | 6.928 | 3  |
| 1893 | IPI:IPI00458854.2 | Sart3 Isoform 1 of Squamous cell carcinoma antigen recognized by T-cells 3                  | 5.3  | 4.782 | 4  |
| 1894 | IPI:IPI00337980.5 | Rab21 Ras-related protein Rab-21                                                            | 5.3  | 17.12 | 4  |
| 1895 | IPI:IPI00227730.1 | Nhlrc2 NHL repeat-containing protein 2                                                      | 5.3  | 6.897 | 3  |
| 1896 | IPI:IPI00889899.1 | Gm7251 hypothetical protein                                                                 | 5.29 | 48.43 | 59 |
| 1897 | IPI:IPI00277001.4 | Psma4 Proteasome subunit alpha type-4                                                       | 5.29 | 16.48 | 3  |
| 1898 | IPI:IPI00651798.1 | Acsl3 long-chain-fatty-acid--CoA ligase 3 isoform a                                         | 5.29 | 7.778 | 3  |
| 1899 | IPI:IPI00132722.8 | Anxa3 Annexin A3                                                                            | 5.29 | 12.38 | 3  |
| 1900 | IPI:IPI00321634.1 | Lman2 Vesicular integral-membrane protein VIP36                                             | 5.28 | 10.89 | 3  |
| 1901 | IPI:IPI00228583.5 | Mtpn Myotrophin                                                                             | 5.28 | 45.76 | 4  |
| 1902 | IPI:IPI00274407.1 | Tufm Isoform 1 of Elongation factor Tu, mitochondrial                                       | 5.28 | 6.858 | 3  |
| 1903 | IPI:IPI00875863.1 | Rhot2 Mitochondrial Rho GTPase 2                                                            | 5.27 | 17.9  | 8  |
| 1904 | IPI:IPI00108844.1 | M6pr Cation-dependent mannose-6-phosphate receptor                                          | 5.26 | 20.14 | 4  |
| 1905 | IPI:IPI00314467.3 | Psmb3 Proteasome subunit beta type-3                                                        | 5.26 | 18.54 | 4  |
| 1906 | IPI:IPI00225633.3 | Sub1 Activated RNA polymerase II transcriptional coactivator p15                            | 5.25 | 23.62 | 4  |
| 1907 | IPI:IPI00121378.2 | Alcam CD166 antigen                                                                         | 5.25 | 4.46  | 3  |
| 1908 | IPI:IPI00845537.1 | Rabep1 Isoform 6 of Rab GTPase-binding effector protein 1                                   | 5.25 | 6.134 | 4  |
| 1909 | IPI:IPI00856974.1 | Ctbp2 Isoform 2 of C-terminal-binding protein 2                                             | 5.24 | 4.656 | 5  |
| 1910 | IPI:IPI00556775.2 | Ptgr2 Isoform 2 of Prostaglandin reductase 2                                                | 5.24 | 14.87 | 4  |
| 1911 | IPI:IPI00128642.1 | Cbr2 Carbonyl reductase [NADPH] 2                                                           | 5.22 | 15.57 | 4  |

|      |                   |                                                                                |      |       |   |
|------|-------------------|--------------------------------------------------------------------------------|------|-------|---|
| 1912 | IPI:IPI00227928.3 | Slc6a1 Sodium- and chloride-dependent GABA transporter 1                       | 5.21 | 10.85 | 4 |
| 1913 | IPI:IPI00136683.1 | Acot2 Acyl-coenzyme A thioesterase 2, mitochondrial                            | 5.21 | 9.272 | 4 |
| 1914 | IPI:IPI00876341.1 | Vdac3 Voltage-dependent anion-selective channel protein 3                      | 5.21 | 20.49 | 8 |
| 1915 | IPI:IPI00322440.5 | Ube2k Ubiquitin-conjugating enzyme E2 K                                        | 5.19 | 34    | 5 |
| 1916 | IPI:IPI00828965.1 | Echdc1 Isoform 2 of Enoyl-CoA hydratase domain-containing protein 1            | 5.19 | 20.07 | 3 |
| 1917 | IPI:IPI00473646.2 | Rhot2 Uncharacterized protein                                                  | 5.18 | 17.86 | 7 |
| 1918 | IPI:IPI00403589.1 | Erh;Gm10131 Enhancer of rudimentary homolog                                    | 5.18 | 48.08 | 6 |
| 1919 | IPI:IPI00515140.1 | As3mt Arsenite methyltransferase                                               | 5.18 | 11.7  | 3 |
| 1920 | IPI:IPI00132950.1 | Rps21 40S ribosomal protein S21                                                | 5.18 | 48.19 | 4 |
| 1921 | IPI:IPI00874704.1 | Gm12854 Uncharacterized protein                                                | 5.18 | 35.42 | 3 |
| 1922 | IPI:IPI00874670.1 | Abhd14b Uncharacterized protein                                                | 5.18 | 16.67 | 3 |
| 1923 | IPI:IPI00919216.1 | Phax phosphorylated adapter RNA export protein isoform 2                       | 5.14 | 12.4  | 3 |
| 1924 | IPI:IPI00129451.1 | Cpne6 Copine-6                                                                 | 5.12 | 5.386 | 3 |
| 1925 | IPI:IPI00317298.2 | Snw1 SNW domain-containing protein 1                                           | 5.11 | 10.63 | 4 |
| 1926 | IPI:IPI00938432.1 | Mtx1 metaxin-1 isoform 2                                                       | 5.11 | 7.826 | 3 |
| 1927 | IPI:IPI00131368.3 | Krt6a Keratin, type II cytoskeletal 6A                                         | 5.11 | 9.222 | 9 |
| 1928 | IPI:IPI00649068.1 | Elav2 ELAV (Embryonic lethal, abnormal vision, Drosophila)-like 2              | 5.1  | 5.412 | 3 |
| 1929 | IPI:IPI00313390.3 | Chchd6 Coiled-coil-helix-coiled-coil-helix domain-containing protein 6         | 5.09 | 12.24 | 3 |
| 1930 | IPI:IPI00129107.1 | Gipc1 PDZ domain-containing protein GIPC1                                      | 5.08 | 11.11 | 3 |
| 1931 | IPI:IPI00130998.1 | Rgr RPE-retinal G protein-coupled receptor                                     | 5.08 | 11.34 | 4 |
| 1932 | IPI:IPI00474783.4 | Acaca Isoform 1 of Acetyl-CoA carboxylase 1                                    | 5.08 | 2.345 | 4 |
| 1933 | IPI:IPI00331283.2 | Folr1 Folr1 protein                                                            | 5.06 | 13.73 | 3 |
| 1934 | IPI:IPI00896657.1 | Copg2 Isoform 4 of Coatomer subunit gamma-2                                    | 5.05 | 3.678 | 3 |
| 1935 | IPI:IPI00454052.1 | A2m Alpha-2-macroglobulin-P                                                    | 5.05 | 4.071 | 3 |
| 1936 | IPI:IPI00170157.1 | Hook1 Isoform 1 of Protein Hook homolog 1                                      | 5.05 | 4.533 | 3 |
| 1937 | IPI:IPI00122101.6 | Slc6a9 Isoform GlyT-1A of Sodium- and chloride-dependent glycine transporter 1 | 5.05 | 7.109 | 4 |
| 1938 | IPI:IPI00230566.4 | Gng7 guanine nucleotide-binding protein G(I)/G(S)/G(O) subunit gamma-7         | 5.04 | 63.77 | 4 |
| 1939 | IPI:IPI00453735.1 | Bfsp2 Isoform 1 of Phakinin                                                    | 5.03 | 10.58 | 4 |
| 1940 | IPI:IPI00116236.5 | Gstt3 Glutathione S-transferase, theta 3                                       | 5.02 | 19.92 | 4 |
| 1941 | IPI:IPI00130339.3 | Bat5 Protein BAT5                                                              | 5.02 | 7.527 | 4 |
| 1942 | IPI:IPI00856773.1 | Tial1 Tial1 protein                                                            | 5.01 | 13.07 | 3 |
| 1943 | IPI:IPI00880243.1 | Cnot1 Isoform 4 of CCR4-NOT transcription complex subunit 1                    | 5    | 1.81  | 3 |
| 1944 | IPI:IPI00468894.2 | Gngt2 Guanine nucleotide-binding protein                                       | 4.99 | 50.72 | 9 |

|      |                   | G(I)/G(S)/G(O) subunit gamma-T2                                                     |      |       |    |
|------|-------------------|-------------------------------------------------------------------------------------|------|-------|----|
| 1945 | IPI:IPI00322156.1 | Slc38a3 Sodium-coupled neutral amino acid transporter 3                             | 4.98 | 7.723 | 3  |
| 1946 | IPI:IPI00115866.3 | Hagh Isoform 1 of Hydroxyacylglutathione hydrolase, mitochondrial                   | 4.98 | 14.89 | 3  |
| 1947 | IPI:IPI00132993.1 | Pak1 Serine/threonine-protein kinase PAK 1                                          | 4.98 | 14.13 | 6  |
| 1948 | IPI:IPI00955134.1 | Arpc4 Putative uncharacterized protein                                              | 4.97 | 16.07 | 3  |
| 1949 | IPI:IPI00169998.2 | Cbr3 carbonyl reductase 3                                                           | 4.97 | 16.25 | 3  |
| 1950 | IPI:IPI00122865.1 | Scamp5 Secretory carrier-associated membrane protein 5                              | 4.96 | 25.11 | 4  |
| 1951 | IPI:IPI00943440.1 | Ccar1 Isoform 3 of Cell division cycle and apoptosis regulator protein 1            | 4.96 | 3.229 | 3  |
| 1952 | IPI:IPI00676841.1 | Gm5081 hypothetical protein LOC328099                                               | 4.96 | 13.21 | 4  |
| 1953 | IPI:IPI00109212.3 | Snx2 Sorting nexin-2                                                                | 4.95 | 13.29 | 6  |
| 1954 | IPI:IPI00467747.2 | Negr1 Putative uncharacterized protein                                              | 4.95 | 16.11 | 4  |
| 1955 | IPI:IPI00113895.1 | Actr1a Alpha-centractin                                                             | 4.94 | 50    | 18 |
| 1956 | IPI:IPI00126184.7 | Gc Vitamin D-binding protein                                                        | 4.94 | 7.143 | 3  |
| 1957 | IPI:IPI00117569.3 | Rps11 Putative uncharacterized protein                                              | 4.92 | 21.08 | 3  |
| 1958 | IPI:IPI00315135.3 | Tomm22 Mitochondrial import receptor subunit TOM22 homolog                          | 4.91 | 42.25 | 3  |
| 1959 | IPI:IPI00110852.4 | Ssr1 Translocon-associated protein alpha, muscle specific isoform                   | 4.91 | 20.13 | 4  |
| 1960 | IPI:IPI00608021.1 | Ddi2 Protein DDI1 homolog 2                                                         | 4.9  | 11.78 | 3  |
| 1961 | IPI:IPI00458001.1 | Atxn2l Isoform 2 of Ataxin-2-like protein                                           | 4.9  | 4.097 | 3  |
| 1962 | IPI:IPI00648247.1 | Tdrd7 Tudor domain containing 7                                                     | 4.9  | 3.217 | 3  |
| 1963 | IPI:IPI00404981.1 | Nae1 NEDD8-activating enzyme E1 regulatory subunit                                  | 4.89 | 7.116 | 2  |
| 1964 | IPI:IPI00400301.2 | Cpox Coproporphyrinogen-III oxidase, mitochondrial                                  | 4.89 | 11.96 | 3  |
| 1965 | IPI:IPI00473196.1 | Srsf10 Isoform 2 of Serine/arginine-rich splicing factor 10                         | 4.88 | 16.86 | 4  |
| 1966 | IPI:IPI00845769.1 | Gpd1l Isoform 2 of Glycerol-3-phosphate dehydrogenase 1-like protein                | 4.87 | 15.63 | 4  |
| 1967 | IPI:IPI00169979.2 | Nmral1 Isoform 1 of NmrA-like family domain-containing protein 1                    | 4.87 | 12.3  | 3  |
| 1968 | IPI:IPI00319231.4 | Rps15 40S ribosomal protein S15                                                     | 4.85 | 29.66 | 5  |
| 1969 | IPI:IPI00855186.2 | Srp54c signal recognition particle 54C                                              | 4.85 | 7.738 | 3  |
| 1970 | IPI:IPI00221688.2 | Ublcp1 Isoform 1 of Ubiquitin-like domain-containing CTD phosphatase 1              | 4.83 | 8.176 | 3  |
| 1971 | IPI:IPI00114246.2 | Ndufb11 NADH dehydrogenase [ubiquinone] 1 beta subcomplex subunit 11, mitochondrial | 4.83 | 22.52 | 3  |
| 1972 | IPI:IPI00330887.1 | Negr1 Neuronal growth regulator 1                                                   | 4.83 | 14.08 | 3  |
| 1973 | IPI:IPI00462424.1 | Rnps1 Isoform 1 of RNA-binding protein with serine-rich domain 1                    | 4.82 | 16.07 | 4  |
| 1974 | IPI:IPI00830423.1 | Tnni2 Troponin I, skeletal, fast 2                                                  | 4.81 | 18.95 | 4  |

|      |                   |                                                                          |      |       |    |
|------|-------------------|--------------------------------------------------------------------------|------|-------|----|
| 1975 | IPI:IPI00762051.1 | Rpl24 60S ribosomal protein L24                                          | 4.81 | 19.11 | 3  |
| 1976 | IPI:IPI00881105.1 | Gnpda2 Isoform 1 of Glucosamine-6-phosphate isomerase 2                  | 4.8  | 19.2  | 3  |
| 1977 | IPI:IPI00111045.1 | Timm50 Mitochondrial import inner membrane translocase subunit TIM50     | 4.75 | 12.18 | 3  |
| 1978 | IPI:IPI00130240.1 | Ppic Peptidyl-prolyl cis-trans isomerase C                               | 4.75 | 25.47 | 6  |
| 1979 | IPI:IPI00856781.1 | Negr1 Uncharacterized protein                                            | 4.74 | 14.89 | 3  |
| 1980 | IPI:IPI00915057.1 | Acsl3 long-chain-fatty-acid--CoA ligase 3 isoform b                      | 4.73 | 6.514 | 2  |
| 1981 | IPI:IPI00169862.1 | Coq9 Ubiquinone biosynthesis protein COQ9, mitochondrial                 | 4.72 | 9.585 | 4  |
| 1982 | IPI:IPI00226249.1 | Ccdc104 Coiled-coil domain-containing protein 104                        | 4.72 | 11.95 | 3  |
| 1983 | IPI:IPI00648647.2 | Spag7 sperm-associated antigen 7 isoform 2                               | 4.72 | 17.97 | 3  |
| 1984 | IPI:IPI00474073.1 | Mapre2 Isoform 2 of Microtubule-associated protein RP/EB family member 2 | 4.71 | 15.77 | 6  |
| 1985 | IPI:IPI00110760.1 | Dnajb4 DnaJ homolog subfamily B member 4                                 | 4.71 | 11.57 | 3  |
| 1986 | IPI:IPI00127008.1 | Thrap3 Thrap3 protein (Fragment)                                         | 4.7  | 13.09 | 3  |
| 1987 | IPI:IPI00121627.3 | Clptm1 Cleft lip and palate transmembrane protein 1 homolog              | 4.7  | 8.735 | 3  |
| 1988 | IPI:IPI00659907.2 | Gm5863 similar to glyceraldehyde-3-phosphate-dehydrogenase isoform 1     | 4.69 | 63.58 | 76 |
| 1989 | IPI:IPI00830960.1 | Ptges3 Uncharacterized protein                                           | 4.69 | 23.08 | 4  |
| 1990 | IPI:IPI00308446.3 | Ahcyl2 putative adenosylhomocysteinase 3 isoform 1                       | 4.68 | 9.487 | 5  |
| 1991 | IPI:IPI00230283.5 | Gfm1 Elongation factor G, mitochondrial                                  | 4.66 | 6.791 | 3  |
| 1992 | IPI:IPI00115580.4 | Eif3m Eukaryotic translation initiation factor 3 subunit M               | 4.65 | 11.76 | 3  |
| 1993 | IPI:IPI00420949.3 | Upf1 Isoform 1 of Regulator of nonsense transcripts 1                    | 4.65 | 1.957 | 2  |
| 1994 | IPI:IPI00230642.1 | Cast Isoform 3 of Calpastatin                                            | 4.64 | 7.703 | 3  |
| 1995 | IPI:IPI00123333.5 | Wbp11 WW domain-binding protein 11                                       | 4.64 | 5.304 | 3  |
| 1996 | IPI:IPI00123744.1 | Cst3 Cystatin-C                                                          | 4.64 | 32.14 | 3  |
| 1997 | IPI:IPI00109153.6 | Slc17a7 Vesicular glutamate transporter 1                                | 4.63 | 2.143 | 2  |
| 1998 | IPI:IPI00453821.2 | Nup155 Nuclear pore complex protein Nup155                               | 4.62 | 4.17  | 4  |
| 1999 | IPI:IPI00119952.1 | Gpm6b Isoform 1 of Neuronal membrane glycoprotein M6-b                   | 4.61 | 9.756 | 2  |
| 2000 | IPI:IPI00458704.2 | Nop16 Nucleolar protein 16                                               | 4.6  | 20.79 | 4  |
| 2001 | IPI:IPI00120793.1 | Prnp Major prion protein                                                 | 4.6  | 11.81 | 3  |
| 2002 | IPI:IPI00828221.2 | Gpm6b neuronal membrane glycoprotein M6-b isoform 1                      | 4.6  | 13.72 | 3  |
| 2003 | IPI:IPI00119581.2 | Fbi;LOC100044829 rRNA 2'-O-methyltransferase fibrillarin                 | 4.59 | 13.46 | 4  |
| 2004 | IPI:IPI00857780.1 | Cadm3 Uncharacterized protein                                            | 4.57 | 10.23 | 4  |
| 2005 | IPI:IPI00268673.6 | Mtor Isoform 1 of Serine/threonine-protein kinase mTOR                   | 4.57 | 2.04  | 4  |

|      |                   |                                                                                           |      |       |   |
|------|-------------------|-------------------------------------------------------------------------------------------|------|-------|---|
| 2006 | IPI:IPI00132142.1 | Atg3 Ubiquitin-like-conjugating enzyme ATG3                                               | 4.56 | 10.19 | 3 |
| 2007 | IPI:IPI00120495.1 | Prmt1 Isoform 1 of Protein arginine N-methyltransferase 1                                 | 4.55 | 10.78 | 3 |
| 2008 | IPI:IPI00264398.3 | Rpl19-ps11 similar to Mus musculus ribosomal protein L19                                  | 4.54 | 25.51 | 6 |
| 2009 | IPI:IPI00283057.1 | Xrn2 Isoform 2 of 5'-3' exoribonuclease 2                                                 | 4.54 | 4.329 | 3 |
| 2010 | IPI:IPI00119058.1 | Grb2 Isoform 1 of Growth factor receptor-bound protein 2                                  | 4.54 | 11.98 | 3 |
| 2011 | IPI:IPI00882056.2 | Mapre2 microtubule-associated protein RP/EB family member 2 isoform 3                     | 4.54 | 16.9  | 4 |
| 2012 | IPI:IPI00622716.4 | Ctnnbl1 Beta-catenin-like protein 1                                                       | 4.51 | 4.263 | 3 |
| 2013 | IPI:IPI00153792.1 | 2410015M20Rik Protein QIL1                                                                | 4.51 | 22.69 | 2 |
| 2014 | IPI:IPI00649986.2 | Psme2 28 kDa protein                                                                      | 4.51 | 11.51 | 2 |
| 2015 | IPI:IPI00828543.3 | Hcfc1 Host cell factor C1                                                                 | 4.5  | 2.983 | 3 |
| 2016 | IPI:IPI00119020.1 | Chmp2a Charged multivesicular body protein 2a                                             | 4.48 | 11.71 | 3 |
| 2017 | IPI:IPI00124906.1 | Cdc42ep4 Cdc42 effector protein 4                                                         | 4.47 | 10.6  | 2 |
| 2018 | IPI:IPI00850376.1 | LOC100047915 similar to Memo1 protein                                                     | 4.47 | 10.91 | 2 |
| 2019 | IPI:IPI00318522.3 | Gad2 Glutamate decarboxylase 2                                                            | 4.47 | 5.641 | 2 |
| 2020 | IPI:IPI00127447.3 | Scarb2 Lysosome membrane protein 2                                                        | 4.46 | 4.812 | 2 |
| 2021 | IPI:IPI00648313.1 | Srrm1 serine/arginine repetitive matrix protein 1 isoform 2                               | 4.46 | 2.723 | 2 |
| 2022 | IPI:IPI00223714.5 | Hist1h1e Histone H1.4                                                                     | 4.45 | 26.03 | 9 |
| 2023 | IPI:IPI00830976.1 | Nasp nuclear autoantigenic sperm protein isoform 2                                        | 4.45 | 7.374 | 6 |
| 2024 | IPI:IPI00118929.3 | Iggbp1 Immunoglobulin-binding protein 1                                                   | 4.45 | 8.235 | 2 |
| 2025 | IPI:IPI00463297.4 | Gm5745 60S ribosomal protein L36                                                          | 4.44 | 28.85 | 3 |
| 2026 | IPI:IPI00229361.2 | Grm6 Metabotropic glutamate receptor 6                                                    | 4.41 | 4.822 | 3 |
| 2027 | IPI:IPI00648993.1 | Grb2 Growth factor receptor bound protein 2                                               | 4.41 | 12.81 | 3 |
| 2028 | IPI:IPI00308976.1 | Me3 NADP-dependent malic enzyme, mitochondrial                                            | 4.4  | 9.106 | 4 |
| 2029 | IPI:IPI00649890.2 | 0610037L13Rik Novel protein                                                               | 4.4  | 23.91 | 2 |
| 2030 | IPI:IPI00137087.5 | Arfgef2 ADP-ribosylation factor guanine nucleotide-exchange factor 2                      | 4.39 | 1.897 | 4 |
| 2031 | IPI:IPI00125652.1 | Txn2 Thioredoxin, mitochondrial                                                           | 4.39 | 18.07 | 3 |
| 2032 | IPI:IPI00719947.2 | Gm16417 Uncharacterized protein                                                           | 4.39 | 30.43 | 4 |
| 2033 | IPI:IPI00165716.4 | Gorasp2 Isoform 1 of Golgi reassembly-stacking protein 2                                  | 4.38 | 9.534 | 4 |
| 2034 | IPI:IPI00135345.3 | Nudt2 Bis(5'-nucleosyl)-tetrphosphatase [asymmetrical]                                    | 4.38 | 34.69 | 3 |
| 2035 | IPI:IPI00133249.1 | Surf4 Surfeit locus protein 4                                                             | 4.37 | 12.27 | 4 |
| 2036 | IPI:IPI00308222.3 | Dbnl Isoform 2 of Drebrin-like protein                                                    | 4.37 | 9.931 | 4 |
| 2037 | IPI:IPI00224697.1 | Ppp2r5e Serine/threonine-protein phosphatase 2A 56 kDa regulatory subunit epsilon isoform | 4.36 | 8.137 | 4 |
| 2038 | IPI:IPI00831697.1 | Its1 Intersectin short form 2 variant 2                                                   | 4.36 | 3.415 | 4 |

|      |                   |                                                                             |      |       |    |
|------|-------------------|-----------------------------------------------------------------------------|------|-------|----|
| 2039 | IPI:IPI00956939.1 | Rpl36 60S ribosomal protein L36                                             | 4.35 | 19.05 | 2  |
| 2040 | IPI:IPI00128973.1 | Gap43 Neuromodulin                                                          | 4.34 | 18.06 | 2  |
| 2041 | IPI:IPI00828514.1 | Kif1b kinesin-like protein KIF1B isoform a                                  | 4.34 | 4.87  | 5  |
| 2042 | IPI:IPI00315948.3 | Tbcb Tubulin-folding cofactor B                                             | 4.33 | 27.87 | 4  |
| 2043 | IPI:IPI00114052.1 | Snrpb Small nuclear ribonucleoprotein-associated protein B                  | 4.33 | 10.39 | 4  |
| 2044 | IPI:IPI00349285.2 | Mesdc2 LDLR chaperone MESD                                                  | 4.33 | 13.39 | 2  |
| 2045 | IPI:IPI00122418.1 | Luc7l3 Isoform 2 of Luc7-like protein 3                                     | 4.33 | 6.517 | 4  |
| 2046 | IPI:IPI00468896.7 | Ddx46 Isoform 1 of Probable ATP-dependent RNA helicase DDX46                | 4.33 | 4.651 | 3  |
| 2047 | IPI:IPI00129096.1 | Pnpo Pyridoxine-5'-phosphate oxidase                                        | 4.32 | 18.01 | 3  |
| 2048 | IPI:IPI00656173.1 | Ldb3 Isoform 4 of LIM domain-binding protein 3                              | 4.32 | 20.74 | 8  |
| 2049 | IPI:IPI00406464.2 | Try5 Putative uncharacterized protein                                       | 4.32 | 21.18 | 22 |
| 2050 | IPI:IPI00318982.3 | Psmd12 26S proteasome non-ATPase regulatory subunit 12                      | 4.32 | 15.79 | 5  |
| 2051 | IPI:IPI00329942.4 | Vps26a Isoform 2 of Vacuolar protein sorting-associated protein 26A         | 4.31 | 6.964 | 2  |
| 2052 | IPI:IPI00120165.1 | Crot Peroxisomal carnitine O-octanoyltransferase                            | 4.31 | 7.68  | 3  |
| 2053 | IPI:IPI00330167.4 | Iqsec3 IQ motif and SEC7 domain-containing protein 3                        | 4.3  | 3.933 | 2  |
| 2054 | IPI:IPI00678532.3 | Fam82a2 Regulator of microtubule dynamics protein 3                         | 4.29 | 11.49 | 3  |
| 2055 | IPI:IPI00387337.1 | Bzw2 Basic leucine zipper and W2 domain-containing protein 2                | 4.29 | 6.683 | 2  |
| 2056 | IPI:IPI00135324.2 | Slc12a2 solute carrier family 12 member 2                                   | 4.29 | 4.395 | 5  |
| 2057 | IPI:IPI00458127.1 | Dbnl Isoform 3 of Drebrin-like protein                                      | 4.29 | 9.954 | 4  |
| 2058 | IPI:IPI00119432.1 | Smpd2 Sphingomyelin phosphodiesterase 2                                     | 4.28 | 6.444 | 2  |
| 2059 | IPI:IPI00224078.1 | Prepl Isoform 1 of Prolyl endopeptidase-like                                | 4.28 | 4.414 | 2  |
| 2060 | IPI:IPI00113517.1 | Ctsb Cathepsin B                                                            | 4.27 | 15.04 | 5  |
| 2061 | IPI:IPI00118438.4 | Srrm1 Isoform 2 of Serine/arginine repetitive matrix protein 1              | 4.27 | 2.787 | 2  |
| 2062 | IPI:IPI00132096.3 | Mtap S-methyl-5'-thioadenosine phosphorylase                                | 4.27 | 13.43 | 2  |
| 2063 | IPI:IPI00226414.7 | Abhd10 Isoform 1 of Abhydrolase domain-containing protein 10, mitochondrial | 4.27 | 18.86 | 3  |
| 2064 | IPI:IPI00230133.5 | Hist1h1b Histone H1.5                                                       | 4.27 | 17.04 | 3  |
| 2065 | IPI:IPI00903427.1 | Nisch Isoform 3 of Nischarin                                                | 4.26 | 2.374 | 2  |
| 2066 | IPI:IPI00875404.1 | Clcn6 Chloride transport protein 6                                          | 4.26 | 3.218 | 2  |
| 2067 | IPI:IPI00137296.1 | LOC100039215;Tsnax Translin-associated protein X                            | 4.26 | 20.34 | 4  |
| 2068 | IPI:IPI00122413.2 | Rpl9;Rpl9-ps4 60S ribosomal protein L9                                      | 4.26 | 18.75 | 4  |
| 2069 | IPI:IPI00128564.1 | Psmd4 Isoform Rpn10A of 26S proteasome non-ATPase regulatory subunit 4      | 4.25 | 22.61 | 6  |
| 2070 | IPI:IPI00126940.1 | Adk Isoform Long of Adenosine kinase                                        | 4.25 | 12.74 | 5  |
| 2071 | IPI:IPI00849113.1 | LOC100048445 similar to fau                                                 | 4.25 | 8.271 | 2  |
| 2072 | IPI:IPI00130127.2 | Gys1 Glycogen [starch] synthase, muscle                                     | 4.25 | 5.962 | 2  |

|      |                   |                                                                                            |      |       |     |
|------|-------------------|--------------------------------------------------------------------------------------------|------|-------|-----|
| 2073 | IPI:IPI00853728.1 | LOC100044976 similar to Vps37a protein                                                     | 4.25 | 13.08 | 4   |
| 2074 | IPI:IPI00410802.2 | Cd44 CD44 antigen isoform a                                                                | 4.25 | 4.359 | 3   |
| 2075 | IPI:IPI00470184.2 | Slc1a2 Isoform Glt-1 of Excitatory amino acid transporter 2                                | 4.23 | 4.545 | 2   |
| 2076 | IPI:IPI00340036.2 | Gm5093 similar to ribosomal protein L11                                                    | 4.23 | 11.62 | 2   |
| 2077 | IPI:IPI00133955.1 | Snrpe Small nuclear ribonucleoprotein E                                                    | 4.22 | 25    | 3   |
| 2078 | IPI:IPI00133034.3 | Hint2 Histidine triad nucleotide-binding protein 2, mitochondrial                          | 4.22 | 31.29 | 4   |
| 2079 | IPI:IPI00849174.1 | Gm4604 similar to rat ribosomal protein L36                                                | 4.21 | 19.05 | 2   |
| 2080 | IPI:IPI00230570.1 | Psmd4 Isoform Rpn10D of 26S proteasome non-ATPase regulatory subunit 4                     | 4.21 | 16.91 | 3   |
| 2081 | IPI:IPI00128254.2 | Strbp Isoform 1 of Spermatid perinuclear RNA-binding protein                               | 4.2  | 8.631 | 5   |
| 2082 | IPI:IPI00620728.2 | Gdap1l1 ganglioside-induced differentiation-associated protein 1-like 1                    | 4.2  | 13.62 | 3   |
| 2083 | IPI:IPI00882129.1 | Gyg Uncharacterized protein                                                                | 4.2  | 9.429 | 2   |
| 2084 | IPI:IPI00230119.5 | Igln5 IgLON family member 5                                                                | 4.2  | 12.8  | 3   |
| 2085 | IPI:IPI00114982.1 | Stat5b Signal transducer and activator of transcription 5B                                 | 4.19 | 5.471 | 4   |
| 2086 | IPI:IPI00845840.1 | Pkm2 Isoform M1 of Pyruvate kinase isozymes M1/M2                                          | 4.19 | 79.1  | 218 |
| 2087 | IPI:IPI00856197.1 | Aplp2 amyloid-like protein 2 isoform b                                                     | 4.19 | 3.819 | 2   |
| 2088 | IPI:IPI00322097.6 | Fyn Isoform 2 of Tyrosine-protein kinase Fyn                                               | 4.19 | 2.996 | 3   |
| 2089 | IPI:IPI00762273.1 | Tor1aip1 Lamina-associated polypeptide 1B                                                  | 4.19 | 4.706 | 2   |
| 2090 | IPI:IPI00111258.4 | Mvp major vault protein                                                                    | 4.19 | 3.793 | 3   |
| 2091 | IPI:IPI00123924.1 | Serpina1d Alpha-1-antitrypsin 1-4                                                          | 4.19 | 41.89 | 20  |
| 2092 | IPI:IPI00128027.1 | Slc24a1 Solute carrier family 24 (Sodium/potassium/calcium exchanger), member 1            | 4.18 | 7.168 | 7   |
| 2093 | IPI:IPI00127472.2 | Arvcf Isoform 3 of Armadillo repeat protein deleted in velo-cardio-facial syndrome homolog | 4.18 | 3.996 | 3   |
| 2094 | IPI:IPI00761677.1 | Gtpbp1 GTP-binding protein 1                                                               | 4.18 | 8.084 | 4   |
| 2095 | IPI:IPI00938437.1 | Akr7a5 aflatoxin B1 aldehyde reductase member 2                                            | 4.18 | 14.99 | 4   |
| 2096 | IPI:IPI00828223.1 | Srp68 Signal recognition particle 68                                                       | 4.18 | 5.963 | 2   |
| 2097 | IPI:IPI00336318.1 | Pip4k2b Phosphatidylinositol-5-phosphate 4-kinase type-2 beta                              | 4.17 | 8.173 | 4   |
| 2098 | IPI:IPI00379694.4 | Hmgcl hydroxymethylglutaryl-CoA lyase, mitochondrial precursor                             | 4.17 | 19.38 | 3   |
| 2099 | IPI:IPI00556765.1 | Sri Isoform 2 of Sorcin                                                                    | 4.17 | 14.75 | 3   |
| 2100 | IPI:IPI00135042.1 | Dtna Isoform 1 of Dystrobrevin alpha                                                       | 4.17 | 3.753 | 3   |
| 2101 | IPI:IPI00137594.2 | Map1lc3a Microtubule-associated proteins 1A/1B light chain 3A                              | 4.16 | 23.14 | 3   |
| 2102 | IPI:IPI00113713.1 | Gm5614 Uncharacterized protein                                                             | 4.16 | 24.76 | 3   |
| 2103 | IPI:IPI00222549.6 | Rpl30-ps8;Rpl30 60S ribosomal protein L30                                                  | 4.16 | 24.35 | 2   |



|      |                   |                                                                          |      |       |   |
|------|-------------------|--------------------------------------------------------------------------|------|-------|---|
| 2104 | IPI:IPI00125513.1 | Timm9 Mitochondrial import inner membrane translocase subunit Tim9       | 4.16 | 29.21 | 4 |
| 2105 | IPI:IPI00556777.1 | Gucy1a3 guanylate cyclase soluble subunit alpha-3                        | 4.16 | 7.815 | 3 |
| 2106 | IPI:IPI00265279.1 | Gm15361 similar to UBE2D3                                                | 4.15 | 21.09 | 4 |
| 2107 | IPI:IPI00353420.7 | Utrn utrophin                                                            | 4.15 | 1.108 | 4 |
| 2108 | IPI:IPI00124096.1 | S100a4 Protein S100-A4                                                   | 4.15 | 24.75 | 3 |
| 2109 | IPI:IPI00130264.1 | Uckl1 Uridine-cytidine kinase-like 1                                     | 4.14 | 6.569 | 2 |
| 2110 | IPI:IPI00798544.1 | Enoph1 Isoform 2 of Enolase-phosphatase E1                               | 4.14 | 18.58 | 3 |
| 2111 | IPI:IPI00351266.2 | Dhx36 Probable ATP-dependent RNA helicase DHX36                          | 4.14 | 3.596 | 3 |
| 2112 | IPI:IPI00119813.3 | Lsm5;LOC100044729 U6 snRNA-associated Sm-like protein LSM5               | 4.14 | 46.15 | 2 |
| 2113 | IPI:IPI00110050.2 | Cdk11b Isoform 1 of Cell division protein kinase 11                      | 4.13 | 3.827 | 2 |
| 2114 | IPI:IPI00110729.1 | Chmp5 Charged multivesicular body protein 5                              | 4.13 | 10.5  | 2 |
| 2115 | IPI:IPI00222412.3 | Zmpste24 CAAX prenyl protease 1 homolog                                  | 4.13 | 6.737 | 3 |
| 2116 | IPI:IPI00944143.1 | Serpinb6a serpin B6 isoform a                                            | 4.13 | 12.28 | 3 |
| 2117 | IPI:IPI00756875.1 | Ctnnd1 107 kDa protein                                                   | 4.13 | 3.434 | 3 |
| 2118 | IPI:IPI00875609.1 | Slc30a9 Isoform 1 of Zinc transporter 9                                  | 4.13 | 5.291 | 2 |
| 2119 | IPI:IPI00153184.4 | Samd11 sterile alpha motif domain-containing protein 11                  | 4.13 | 7.428 | 2 |
| 2120 | IPI:IPI00876549.1 | Hist1h2bj;Hist1h2bl;Hist1h2bn;LOC100046213;Hist1h2bf Histone H2B         | 4.13 | 24.22 | 6 |
| 2121 | IPI:IPI00830860.1 | Clasp2 CLIP-associating protein 2 isoform b                              | 4.12 | 2.176 | 2 |
| 2122 | IPI:IPI00955687.1 | Usp10 Isoform 1 of Ubiquitin carboxyl-terminal hydrolase 10              | 4.12 | 3.03  | 2 |
| 2123 | IPI:IPI00120199.1 | Pmpca Mitochondrial-processing peptidase subunit alpha                   | 4.12 | 7.824 | 2 |
| 2124 | IPI:IPI00387227.1 | Arfgap1 Isoform 1 of ADP-ribosylation factor GTPase-activating protein 1 | 4.12 | 9.179 | 2 |
| 2125 | IPI:IPI00110224.1 | Hsd17b11 Isoform 1 of Estradiol 17-beta-dehydrogenase 11                 | 4.12 | 12.75 | 2 |
| 2126 | IPI:IPI00653931.1 | Fah fumarylacetoacetase                                                  | 4.12 | 6.921 | 2 |
| 2127 | IPI:IPI00928125.1 | Me3 NADP-dependent malic enzyme, mitochondrial precursor                 | 4.12 | 7.616 | 3 |
| 2128 | IPI:IPI00170083.1 | Appl2 DCC-interacting protein 13-beta                                    | 4.11 | 7.402 | 3 |
| 2129 | IPI:IPI00649969.1 | Mycbp C-myc binding protein                                              | 4.11 | 30.14 | 3 |
| 2130 | IPI:IPI00756529.1 | Arfgap1 ADP-ribosylation factor GTPase-activating protein 1 isoform c    | 4.11 | 9.645 | 2 |
| 2131 | IPI:IPI00221400.5 | Adh1 Alcohol dehydrogenase 1                                             | 4.11 | 9.333 | 3 |
| 2132 | IPI:IPI00620823.2 | Gak Isoform 2 of Cyclin-G-associated kinase                              | 4.11 | 3.264 | 4 |
| 2133 | IPI:IPI00222037.3 | Mia3 Isoform 1 of Melanoma inhibitory activity protein 3                 | 4.11 | 1.864 | 2 |
| 2134 | IPI:IPI00648186.4 | Clint1 MCG22297, isoform CRA_b                                           | 4.11 | 4.212 | 2 |

|      |                   |                                                                             |      |       |    |
|------|-------------------|-----------------------------------------------------------------------------|------|-------|----|
| 2135 | IPI:IPI00465574.2 | Hnrnpk Putative uncharacterized protein                                     | 4.1  | 56.43 | 47 |
| 2136 | IPI:IPI00473667.1 | Tuba3b;Tuba3a Putative uncharacterized protein                              | 4.1  | 46.08 | 99 |
| 2137 | IPI:IPI00458048.1 | Sorbs1 Isoform 7 of Sorbin and SH3 domain-containing protein 1              | 4.1  | 3.828 | 2  |
| 2138 | IPI:IPI00132005.1 | Nenf Neudesin                                                               | 4.1  | 26.9  | 3  |
| 2139 | IPI:IPI00133047.1 | Mapksp1;Gm5900 Mitogen-activated protein kinase scaffold protein 1          | 4.1  | 33.87 | 3  |
| 2140 | IPI:IPI00315794.1 | Cyb5b Cytochrome b5 type B                                                  | 4.1  | 33.56 | 2  |
| 2141 | IPI:IPI00911149.1 | Zfp207 zinc finger protein 207 isoform 2                                    | 4.1  | 6.054 | 2  |
| 2142 | IPI:IPI00410804.1 | Luc7l Isoform 1 of Putative RNA-binding protein Luc7-like 1                 | 4.1  | 10.24 | 6  |
| 2143 | IPI:IPI00110487.1 | 2310003C23Rik Protein C20orf11 homolog                                      | 4.1  | 31.58 | 4  |
| 2144 | IPI:IPI00875197.1 | Psmb5 Proteasome subunit beta type                                          | 4.1  | 19.21 | 4  |
| 2145 | IPI:IPI00131357.7 | Rps23;Gm15450;LOC100046668 Putative uncharacterized protein                 | 4.09 | 13.1  | 2  |
| 2146 | IPI:IPI00222697.1 | Syng1 Isoform 1B of Synaptogyrin-1                                          | 4.09 | 11.52 | 3  |
| 2147 | IPI:IPI00227749.1 | Ddx19b Putative uncharacterized protein                                     | 4.09 | 6.889 | 2  |
| 2148 | IPI:IPI00378156.2 | Rabgap1 Isoform 1 of Rab GTPase-activating protein 1                        | 4.09 | 3.289 | 3  |
| 2149 | IPI:IPI00138238.1 | H2-Ke2 Prefoldin subunit 6                                                  | 4.09 | 22.83 | 3  |
| 2150 | IPI:IPI00348328.4 | Krt78 keratin Kb40                                                          | 4.09 | 1.311 | 6  |
| 2151 | IPI:IPI00124291.1 | Vps45 Vacuolar protein sorting-associated protein 45                        | 4.09 | 6.316 | 2  |
| 2152 | IPI:IPI00311175.5 | Tuba8 Tubulin alpha-8 chain                                                 | 4.09 | 37.42 | 93 |
| 2153 | IPI:IPI00761172.1 | Ubp2l Isoform 2 of Ubiquitin-associated protein 2-like                      | 4.09 | 3.353 | 2  |
| 2154 | IPI:IPI00675855.2 | Nefh MKIAA0845 protein (Fragment)                                           | 4.08 | 4.111 | 6  |
| 2155 | IPI:IPI00752631.1 | Ctnnd1 Uncharacterized protein                                              | 4.08 | 4.598 | 2  |
| 2156 | IPI:IPI00187270.8 | Zcchc8 Zinc finger CCHC domain-containing protein 8                         | 4.08 | 7.052 | 2  |
| 2157 | IPI:IPI00970318.1 | Mff Uncharacterized protein                                                 | 4.08 | 37.84 | 2  |
| 2158 | IPI:IPI00322922.4 | Fam50a Protein FAM50A                                                       | 4.08 | 7.965 | 2  |
| 2159 | IPI:IPI00314069.1 | Acot9 Acyl-coenzyme A thioesterase 9, mitochondrial                         | 4.08 | 5.695 | 2  |
| 2160 | IPI:IPI00131887.3 | Ptgr1 Prostaglandin reductase 1                                             | 4.08 | 8.207 | 3  |
| 2161 | IPI:IPI00623216.2 | Lrrc57 leucine-rich repeat-containing protein 57 isoform b                  | 4.08 | 9.091 | 2  |
| 2162 | IPI:IPI00134137.1 | Gdap1 Isoform 1 of Ganglioside-induced differentiation-associated protein 1 | 4.08 | 6.704 | 3  |
| 2163 | IPI:IPI00129792.1 | Kpna4 Importin subunit alpha-4                                              | 4.08 | 9.597 | 3  |
| 2164 | IPI:IPI00395060.1 | AW549877 Isoform 1 of UPF0600 protein C5orf51 homolog                       | 4.08 | 7.823 | 2  |
| 2165 | IPI:IPI00417154.3 | Eif4g3 Eukaryotic translation initiation factor 4 gamma, 3                  | 4.07 | 1.9   | 2  |

|      |                   |                                                                    |      |       |    |
|------|-------------------|--------------------------------------------------------------------|------|-------|----|
| 2166 | IPI:IPI00775997.1 | Cald1 Uncharacterized protein                                      | 4.07 | 5.235 | 2  |
| 2167 | IPI:IPI00421119.5 | Rbm25 Isoform 1 of RNA-binding protein 25                          | 4.07 | 2.973 | 2  |
| 2168 | IPI:IPI00331361.2 | Mybbp1a Myb-binding protein 1A                                     | 4.07 | 3.199 | 3  |
| 2169 | IPI:IPI00274222.2 | Acad8 Isobutyryl-CoA dehydrogenase, mitochondrial                  | 4.07 | 8.475 | 3  |
| 2170 | IPI:IPI00128692.1 | Nsdhl Sterol-4-alpha-carboxylate 3-dehydrogenase, decarboxylating  | 4.07 | 8.287 | 3  |
| 2171 | IPI:IPI00119224.1 | Snrpd3 Small nuclear ribonucleoprotein Sm D3                       | 4.07 | 31.75 | 3  |
| 2172 | IPI:IPI00457564.2 | Adal Isoform 1 of Adenosine deaminase-like protein                 | 4.07 | 6.389 | 2  |
| 2173 | IPI:IPI00122928.1 | Tubb6 Tubulin beta-6 chain                                         | 4.07 | 55.26 | 95 |
| 2174 | IPI:IPI00135646.1 | Abcd3 ATP-binding cassette sub-family D member 3                   | 4.07 | 4.249 | 3  |
| 2175 | IPI:IPI00123852.7 | Sdf2 stromal cell-derived factor 2                                 | 4.07 | 16.89 | 2  |
| 2176 | IPI:IPI00230382.1 | Hmbs Isoform 2 of Porphobilinogen deaminase                        | 4.07 | 11.92 | 2  |
| 2177 | IPI:IPI00607076.1 | Srsf4 splicing factor, arginine/serine-rich 4                      | 4.07 | 6.314 | 3  |
| 2178 | IPI:IPI00554992.2 | Kif1a MKIAA4102 protein                                            | 4.07 | 2.934 | 2  |
| 2179 | IPI:IPI00844680.1 | Sfn 14-3-3 protein sigma                                           | 4.06 | 30.24 | 18 |
| 2180 | IPI:IPI00330323.1 | Mogs Mannosyl-oligosaccharide glucosidase                          | 4.06 | 3.957 | 2  |
| 2181 | IPI:IPI00187512.7 | Nt5c3 Isoform 2 of Cytosolic 5'-nucleotidase 3                     | 4.06 | 8.761 | 2  |
| 2182 | IPI:IPI00136906.1 | Capg Macrophage-capping protein                                    | 4.06 | 6.534 | 2  |
| 2183 | IPI:IPI00475322.1 | Msra Msra protein                                                  | 4.06 | 13.47 | 2  |
| 2184 | IPI:IPI00648743.1 | Ndufb6 NADH dehydrogenase (Ubiquinone) 1 beta subcomplex, 6        | 4.06 | 25.77 | 3  |
| 2185 | IPI:IPI00323130.3 | Tceb1;LOC100045866 Transcription elongation factor B polypeptide 1 | 4.06 | 33.04 | 3  |
| 2186 | IPI:IPI00112377.1 | Rdh14 Retinol dehydrogenase 14                                     | 4.06 | 11.98 | 5  |
| 2187 | IPI:IPI00129184.3 | Dus3l Isoform 1 of tRNA-dihydrouridine synthase 3-like             | 4.06 | 6.122 | 2  |
| 2188 | IPI:IPI00467932.4 | Cstf2t Cleavage stimulation factor subunit 2 tau variant           | 4.06 | 7.12  | 2  |
| 2189 | IPI:IPI00119152.1 | Cpe Carboxypeptidase E                                             | 4.06 | 5.252 | 2  |
| 2190 | IPI:IPI00875027.1 | Xpnpep1 Xaa-Pro aminopeptidase 1                                   | 4.06 | 9.791 | 4  |
| 2191 | IPI:IPI00622375.2 | Ubap2l Isoform 4 of Ubiquitin-associated protein 2-like            | 4.06 | 3.077 | 2  |
| 2192 | IPI:IPI00459309.2 | Tmx2;Gm5499 Thioredoxin-related transmembrane protein 2            | 4.05 | 8.814 | 3  |
| 2193 | IPI:IPI00918528.1 | Zfr Protein                                                        | 4.05 | 10.7  | 2  |
| 2194 | IPI:IPI00331170.1 | Prpf3 U4/U6 small nuclear ribonucleoprotein Prp3                   | 4.05 | 3.807 | 2  |
| 2195 | IPI:IPI00751009.1 | Srpk2 serine/threonine-protein kinase SRPK2                        | 4.05 | 4.399 | 3  |
| 2196 | IPI:IPI00848443.1 | Acaca Isoform 2 of Acetyl-CoA carboxylase 1                        | 4.05 | 2.182 | 3  |
| 2197 | IPI:IPI00118143.1 | Ctnn Src substrate cortactin                                       | 4.05 | 6.044 | 3  |
| 2198 | IPI:IPI00132903.1 | Ufc1 Ubiquitin-fold modifier-conjugating enzyme 1                  | 4.05 | 19.76 | 3  |
| 2199 | IPI:IPI00468380.4 | Dclk1 Isoform 1 of Serine/threonine-protein kinase                 | 4.05 | 3.704 | 2  |

|      |                   |                                                                                  |      |       |   |
|------|-------------------|----------------------------------------------------------------------------------|------|-------|---|
|      |                   | DCLK1                                                                            |      |       |   |
| 2200 | IPI:IPI00831350.1 | Tnnt3 Troponin T3, skeletal, fast                                                | 4.05 | 25.23 | 3 |
| 2201 | IPI:IPI00849074.1 | Gm3511;LOC100047305 similar to 40S ribosomal protein S28                         | 4.05 | 30.43 | 2 |
| 2202 | IPI:IPI00605025.2 | Gm8618 Uncharacterized protein                                                   | 4.05 | 13.29 | 2 |
| 2203 | IPI:IPI00938462.1 | Gcat 2-amino-3-ketobutyrate coenzyme A ligase, mitochondrial isoform b           | 4.05 | 10.47 | 3 |
| 2204 | IPI:IPI00877283.1 | Rbm9 RNA-binding protein 9 isoform 3                                             | 4.04 | 5.618 | 7 |
| 2205 | IPI:IPI00874955.1 | A1314180 204 kDa protein                                                         | 4.04 | 1.903 | 3 |
| 2206 | IPI:IPI00407868.1 | Cacna2d1 Isoform 2D of Voltage-dependent calcium channel subunit alpha-2/delta-1 | 4.04 | 2.486 | 2 |
| 2207 | IPI:IPI00938511.1 | Pfkfb2 6-phosphofructo-2-kinase/fructose-2,6-biphosphatase 2 isoform 3           | 4.04 | 4.427 | 2 |
| 2208 | IPI:IPI00133024.1 | Vta1 Vacuolar protein sorting-associated protein VTA1 homolog                    | 4.04 | 14.24 | 3 |
| 2209 | IPI:IPI00122215.1 | Tor1aip1 Torsin-1A-interacting protein 1                                         | 4.04 | 5.385 | 2 |
| 2210 | IPI:IPI00652758.1 | Tom1 target of Myb protein 1 isoform 2                                           | 4.04 | 9.302 | 2 |
| 2211 | IPI:IPI00133387.1 | Hsbp1 Heat shock factor-binding protein 1                                        | 4.04 | 32.89 | 3 |
| 2212 | IPI:IPI00877286.1 | Lsm4 U6 snRNA-associated Sm-like protein LSm4                                    | 4.04 | 16.06 | 2 |
| 2213 | IPI:IPI00321744.3 | Ergic1 Endoplasmic reticulum-Golgi intermediate compartment protein 1            | 4.04 | 13.1  | 3 |
| 2214 | IPI:IPI00124593.1 | Sumo1 Small ubiquitin-related modifier 1                                         | 4.04 | 18.81 | 3 |
| 2215 | IPI:IPI00875416.1 | Sord 40 kDa protein                                                              | 4.04 | 8.8   | 3 |
| 2216 | IPI:IPI00111145.7 | Uprt Uracil phosphoribosyltransferase (FUR1) homolog                             | 4.04 | 18.06 | 3 |
| 2217 | IPI:IPI00875717.2 | Sept8 Septin 8                                                                   | 4.04 | 12.22 | 3 |
| 2218 | IPI:IPI00462140.1 | Krt77 Keratin, type II cytoskeletal 1b                                           | 4.04 | 7.168 | 8 |
| 2219 | IPI:IPI00138302.1 | Gm8129;LOC674727 similar to ribosomal protein L38                                | 4.04 | 32.86 | 3 |
| 2220 | IPI:IPI00229963.6 | Serpib5 Serpin B5                                                                | 4.04 | 7.2   | 3 |
| 2221 | IPI:IPI00110265.1 | Sirt2 Isoform 1 of NAD-dependent deacetylase sirtuin-2                           | 4.04 | 14.65 | 4 |
| 2222 | IPI:IPI00608040.1 | Hdgfrp3 Isoform 2 of Hepatoma-derived growth factor-related protein 3            | 4.04 | 18.54 | 5 |
| 2223 | IPI:IPI00387289.3 | Ces3 Carboxylesterase 3                                                          | 4.04 | 5.841 | 2 |
| 2224 | IPI:IPI00120015.2 | Gucy1a3 Guanylate cyclase soluble subunit alpha-3                                | 4.04 | 5.789 | 2 |
| 2225 | IPI:IPI00379634.2 | Gm5325 Uncharacterized protein                                                   | 4.03 | 68.82 | 7 |
| 2226 | IPI:IPI00128989.1 | Atp6ap1 V-type proton ATPase subunit S1                                          | 4.03 | 7.343 | 3 |
| 2227 | IPI:IPI00969919.1 | Rdh11 UBE-1b                                                                     | 4.03 | 9.667 | 3 |
| 2228 | IPI:IPI00226234.5 | Plaa Phospholipase A-2-activating protein                                        | 4.03 | 4.786 | 2 |
| 2229 | IPI:IPI00750847.2 | Rtn3 Isoform 5 of Reticulon-3                                                    | 4.03 | 2.022 | 2 |
| 2230 | IPI:IPI00108410.1 | Atad1 ATPase family AAA domain-containing protein 1                              | 4.03 | 8.033 | 3 |
| 2231 | IPI:IPI00955082.1 | H2afy core histone macro-H2A.1 isoform 2                                         | 4.03 | 9.973 | 2 |

|      |                   |                                                                                 |      |       |   |
|------|-------------------|---------------------------------------------------------------------------------|------|-------|---|
| 2232 | IPI:IPI00284213.3 | Prpf40a Isoform 1 of Pre-mRNA-processing factor 40 homolog A                    | 4.03 | 3.463 | 2 |
| 2233 | IPI:IPI00122568.3 | Arhgdib Rho GDP-dissociation inhibitor 2                                        | 4.03 | 18.5  | 2 |
| 2234 | IPI:IPI00225023.4 | Slc9a6 solute carrier family 9 (sodium/hydrogen exchanger), member 6            | 4.03 | 4.416 | 2 |
| 2235 | IPI:IPI00230388.5 | Lsm3 U6 snRNA-associated Sm-like protein LSm3                                   | 4.03 | 21.57 | 2 |
| 2236 | IPI:IPI00311833.6 | Uba5 Ubiquitin-like modifier-activating enzyme 5                                | 4.03 | 8.933 | 2 |
| 2237 | IPI:IPI00119896.2 | Dnajb6 Isoform A of DnaJ homolog subfamily B member 6                           | 4.03 | 6.575 | 2 |
| 2238 | IPI:IPI00165811.1 | Ttc8 Isoform 1 of Tetratricopeptide repeat protein 8                            | 4.03 | 5.825 | 2 |
| 2239 | IPI:IPI00111953.1 | Bola1 Bola-like protein 1                                                       | 4.03 | 27.01 | 2 |
| 2240 | IPI:IPI00122740.2 | Macro1 MACRO domain-containing protein 1                                        | 4.03 | 11.46 | 2 |
| 2241 | IPI:IPI00133411.1 | Fam136a Protein FAM136A                                                         | 4.03 | 20.29 | 2 |
| 2242 | IPI:IPI00555143.4 | Ppfia2 Liprin-alpha 2                                                           | 4.03 | 2.705 | 3 |
| 2243 | IPI:IPI00112721.1 | Ppp1r1a Protein phosphatase 1 regulatory subunit 1A                             | 4.03 | 21.05 | 2 |
| 2244 | IPI:IPI00272230.1 | Rab39b Ras-related protein Rab-39B                                              | 4.03 | 19.25 | 3 |
| 2245 | IPI:IPI00663323.2 | Eml2 Isoform 1 of Echinoderm microtubule-associated protein-like 2              | 4.03 | 4.756 | 3 |
| 2246 | IPI:IPI00651876.3 | Rab8a Putative uncharacterized protein                                          | 4.03 | 22.6  | 4 |
| 2247 | IPI:IPI00884486.2 | Usp4 ubiquitin carboxyl-terminal hydrolase 4                                    | 4.03 | 2.703 | 3 |
| 2248 | IPI:IPI00309077.4 | 1110049F12Rik Isoform 2 of UPF0424 protein C1orf128 homolog                     | 4.03 | 13.51 | 2 |
| 2249 | IPI:IPI00111831.1 | Naca Nascent polypeptide-associated complex subunit alpha, muscle-specific form | 4.03 | 1.966 | 3 |
| 2250 | IPI:IPI00223594.1 | Mbp Isoform 11 of Myelin basic protein                                          | 4.03 | 12.5  | 2 |
| 2251 | IPI:IPI00225670.1 | Gphn Gephyrin                                                                   | 4.03 | 5.592 | 2 |
| 2252 | IPI:IPI00317422.2 | Rnmt Isoform 3 of mRNA cap guanine-N7 methyltransferase                         | 4.03 | 5.366 | 2 |
| 2253 | IPI:IPI00755395.1 | Ank1 Isoform 5 of Ankyrin-1                                                     | 4.02 | 4.186 | 6 |
| 2254 | IPI:IPI00310914.1 | Usp4 Ubiquitin carboxyl-terminal hydrolase                                      | 4.02 | 2.951 | 2 |
| 2255 | IPI:IPI00126913.5 | Atad3a Isoform 1 of ATPase family AAA domain-containing protein 3               | 4.02 | 5.584 | 2 |
| 2256 | IPI:IPI00221714.1 | Smndc1 Survival of motor neuron-related-splicing factor 30                      | 4.02 | 13.03 | 2 |
| 2257 | IPI:IPI00877214.1 | Peci Isoform 1 of Peroxisomal 3,2-trans-enoyl-CoA isomerase                     | 4.02 | 6.65  | 2 |
| 2258 | IPI:IPI00969981.1 | Kif2a Uncharacterized protein                                                   | 4.02 | 4.394 | 2 |
| 2259 | IPI:IPI00928256.1 | Dync1li2 cytoplasmic dynein 1 light intermediate chain 2                        | 4.02 | 6.301 | 2 |
| 2260 | IPI:IPI00122152.2 | Rdh10 Retinol dehydrogenase 10                                                  | 4.02 | 9.091 | 2 |
| 2261 | IPI:IPI00283671.4 | 2500003M10Rik Isoform 1 of Friend of PRMT1 protein                              | 4.02 | 11.65 | 2 |
| 2262 | IPI:IPI00268215.1 | Polr2d DNA-directed RNA polymerase II subunit                                   | 4.02 | 25.35 | 3 |

|      |                        |                                                                     |      |       |    |
|------|------------------------|---------------------------------------------------------------------|------|-------|----|
|      |                        | RPB4                                                                |      |       |    |
| 2263 | IPI:IPI00227585.6      | Fabp7 Fatty acid-binding protein, brain                             | 4.02 | 25    | 4  |
| 2264 | IPI:IPI00856427.1      | Sympk symplekin                                                     | 4.02 | 4.037 | 4  |
| 2265 | IPI:IPI00756025.1      | Gm10313 similar to LOC654472 protein                                | 4.02 | 47.45 | 78 |
| 2266 | IPI:IPI00109033.3      | Fam54b Isoform 1 of Protein FAM54B                                  | 4.02 | 10.03 | 2  |
| 2267 | IPI:IPI00126892.1<br>2 | Memo1 Putative uncharacterized protein                              | 4.02 | 12.25 | 2  |
| 2268 | IPI:IPI00678657.3      | Gm7935 similar to Splicing factor 3b, subunit 4                     | 4.02 | 11.06 | 3  |
| 2269 | IPI:IPI00453512.3      | Alkbh5 Probable alpha-ketoglutarate-dependent dioxygenase ABH5      | 4.02 | 12.91 | 2  |
| 2270 | IPI:IPI00756510.1      | Smcp2 Isoform 2 of Stromal membrane-associated protein 2            | 4.02 | 11.84 | 2  |
| 2271 | IPI:IPI00120915.2      | O610037L13Rik Isoform 3 of UPF0587 protein C1orf123 homolog         | 4.02 | 16.84 | 2  |
| 2272 | IPI:IPI00132576.1      | Snrpb2 U2 small nuclear ribonucleoprotein B''                       | 4.02 | 16.89 | 3  |
| 2273 | IPI:IPI00882266.1      | Fip1l1 Uncharacterized protein                                      | 4.02 | 8.679 | 2  |
| 2274 | IPI:IPI00128436.1      | Dgke Diacylglycerol kinase epsilon                                  | 4.01 | 7.624 | 3  |
| 2275 | IPI:IPI00468203.3      | Anxa2 Annexin A2                                                    | 4.01 | 16.84 | 2  |
| 2276 | IPI:IPI00322610.5      | Coasy Bifunctional coenzyme A synthase                              | 4.01 | 6.75  | 2  |
| 2277 | IPI:IPI00187288.6      | Echdc1 Isoform 1 of Enoyl-CoA hydratase domain-containing protein 1 | 4.01 | 18.63 | 3  |
| 2278 | IPI:IPI00330627.5      | Blvra Biliverdin reductase A                                        | 4.01 | 12.88 | 3  |
| 2279 | IPI:IPI00133608.3      | Ociad1 Isoform 1 of OCIA domain-containing protein 1                | 4.01 | 13.77 | 2  |
| 2280 | IPI:IPI00310857.4      | Exosc4 Exosome complex exonuclease RRP41                            | 4.01 | 11.84 | 2  |
| 2281 | IPI:IPI00117181.1      | Flot1 Flotillin-1                                                   | 4.01 | 7.243 | 2  |
| 2282 | IPI:IPI00222447.1      | Tmem11 Transmembrane protein 11                                     | 4.01 | 12.11 | 2  |
| 2283 | IPI:IPI00117687.1      | O610009D07Rik Pre-mRNA branch site protein p14                      | 4.01 | 24.8  | 4  |
| 2284 | IPI:IPI00853967.1      | Pthr2 Peptidyl-tRNA hydrolase 2, mitochondrial                      | 4.01 | 19.89 | 3  |
| 2285 | IPI:IPI00624843.3      | Ermn Ermin                                                          | 4.01 | 14.23 | 4  |
| 2286 | IPI:IPI00403509.6      | Psmd8 26S proteasome non-ATPase regulatory subunit 8                | 4.01 | 6.232 | 3  |
| 2287 | IPI:IPI00881509.2      | Nfu1 NFU1 iron-sulfur cluster scaffold homolog, mitochondrial       | 4.01 | 10.98 | 2  |
| 2288 | IPI:IPI00228289.2      | Cnst Isoform 1 of Consortin                                         | 4.01 | 5.345 | 2  |
| 2289 | IPI:IPI00461199.2      | Bsn Isoform 2 of Protein bassoon                                    | 4.01 | 1.21  | 2  |
| 2290 | IPI:IPI00121448.3      | Guca1b Guanylyl cyclase-activating protein 2                        | 4.01 | 17.91 | 2  |
| 2291 | IPI:IPI00124082.1      | Ccdc115 Coiled-coil domain-containing protein 115                   | 4.01 | 13.89 | 2  |
| 2292 | IPI:IPI00880375.1      | Acyp2 Acylphosphatase                                               | 4.01 | 21.7  | 2  |
| 2293 | IPI:IPI00330599.1      | Mtdh Protein LYRIC                                                  | 4.01 | 4.663 | 3  |
| 2294 | IPI:IPI00409176.1      | Cast Isoform 1 of Calpastatin                                       | 4.01 | 4.442 | 2  |
| 2295 | IPI:IPI00623951.3      | Hist2h2ab;Hist2h2ac Histone H2A type 2-B                            | 4.01 | 24.62 | 3  |
| 2296 | IPI:IPI00918085.1      | Man2c1 Putative uncharacterized protein                             | 4.01 | 3.118 | 2  |

|      |                   |                                                                               |      |       |    |
|------|-------------------|-------------------------------------------------------------------------------|------|-------|----|
| 2297 | IPI:IPI00132529.2 | Adpgk Isoform 1 of ADP-dependent glucokinase                                  | 4.01 | 7.056 | 2  |
| 2298 | IPI:IPI00461314.1 | Lsm2 SnRNP core protein SMX5b                                                 | 4.01 | 48.72 | 2  |
| 2299 | IPI:IPI00849548.2 | Gm13991 similar to Rab5B                                                      | 4.01 | 13.93 | 4  |
| 2300 | IPI:IPI00623542.3 | Slc8a1 sodium/calcium exchanger 1 isoform B                                   | 4.01 | 6.367 | 4  |
| 2301 | IPI:IPI00968950.1 | Gm10334 Protease, serine, 3                                                   | 4.01 | 30.49 | 20 |
| 2302 | IPI:IPI00117043.1 | Acta2 Actin, aortic smooth muscle                                             | 4    | 68.97 | 80 |
| 2303 | IPI:IPI00221615.5 | Arf5 ADP-ribosylation factor 5                                                | 4    | 47.78 | 9  |
| 2304 | IPI:IPI00109368.3 | Calml3 Calmodulin-like protein 3                                              | 4    | 41.61 | 15 |
| 2305 | IPI:IPI00889833.1 | Ubqln2 Ubiquilin 2, isoform CRA_a                                             | 4    | 8.777 | 8  |
| 2306 | IPI:IPI00971301.1 | LOC640369 similar to Rab5B                                                    | 4    | 30    | 6  |
| 2307 | IPI:IPI00124803.1 | Zfp259 Zinc finger protein ZPR1                                               | 4    | 5.447 | 3  |
| 2308 | IPI:IPI00138716.1 | Rap2b Ras-related protein Rap-2b                                              | 4    | 24.04 | 3  |
| 2309 | IPI:IPI00323660.1 | Actl6a Actin-like protein 6A                                                  | 4    | 6.294 | 2  |
| 2310 | IPI:IPI00153381.1 | Uqcr10 Cytochrome b-c1 complex subunit 9                                      | 4    | 37.5  | 3  |
| 2311 | IPI:IPI00135267.1 | Tmem35 Transmembrane protein 35                                               | 4    | 14.37 | 2  |
| 2312 | IPI:IPI00653743.1 | Fahd1 fumarylacetoacetate hydrolase domain-containing protein 1               | 4    | 8.811 | 2  |
| 2313 | IPI:IPI00856839.1 | Pcnp Uncharacterized protein                                                  | 4    | 17.12 | 2  |
| 2314 | IPI:IPI00420172.1 | Agfg1 Isoform 4 of Arf-GAP domain and FG repeats-containing protein 1         | 4    | 9.269 | 3  |
| 2315 | IPI:IPI00845712.1 | 1110049F12Rik Isoform 1 of UPF0424 protein C1orf128 homolog                   | 4    | 14.22 | 2  |
| 2316 | IPI:IPI00947639.1 | Fxyd1 phospholemman isoform a precursor                                       | 4    | 30.53 | 4  |
| 2317 | IPI:IPI00453658.1 | Nit1 Isoform 1 of Nitrilase homolog 1                                         | 4    | 7.121 | 2  |
| 2318 | IPI:IPI00153448.3 | Them4 Isoform 1 of Thioesterase superfamily member 4                          | 4    | 9.13  | 3  |
| 2319 | IPI:IPI00761970.2 | Copz1 20 kDa protein                                                          | 4    | 17.05 | 3  |
| 2320 | IPI:IPI00126548.2 | Agpat1 Putative uncharacterized protein                                       | 4    | 13.5  | 2  |
| 2321 | IPI:IPI00119094.1 | 2810405K02Rik Uncharacterized protein C1orf93 homolog                         | 4    | 8.955 | 2  |
| 2322 | IPI:IPI00377298.2 | Tra2a transformer-2 protein homolog alpha                                     | 4    | 12.06 | 3  |
| 2323 | IPI:IPI00323822.1 | Rras2 Ras-related protein R-Ras2                                              | 4    | 13.73 | 2  |
| 2324 | IPI:IPI00230430.1 | Cartpt Isoform Short of Cocaine- and amphetamine-regulated transcript protein | 4    | 22.41 | 2  |
| 2325 | IPI:IPI00556820.1 | Adpgk Isoform 3 of ADP-dependent glucokinase                                  | 4    | 7.071 | 2  |
| 2326 | IPI:IPI00221921.5 | Cd9 CD9 antigen                                                               | 4    | 5.31  | 2  |
| 2327 | IPI:IPI00169883.1 | Sirt5 NAD-dependent deacetylase sirtuin-5                                     | 4    | 9.032 | 2  |
| 2328 | IPI:IPI00115544.1 | Gng4 Guanine nucleotide-binding protein G(I)/G(S)/G(O) subunit gamma-4        | 4    | 44    | 2  |
| 2329 | IPI:IPI00134017.1 | Chordc1 Cysteine and histidine-rich domain-containing protein 1               | 4    | 16.62 | 3  |
| 2330 | IPI:IPI00121271.1 | 0610011F06Rik UPF0585 protein C16orf13 homolog                                | 4    | 13.73 | 2  |

|      |                   |                                                                               |   |       |     |
|------|-------------------|-------------------------------------------------------------------------------|---|-------|-----|
| 2331 | IPI:IPI00222555.5 | S100a10 Protein S100-A10                                                      | 4 | 27.84 | 3   |
| 2332 | IPI:IPI00131904.1 | Dkk3 Dickkopf-related protein 3                                               | 4 | 7.45  | 2   |
| 2333 | IPI:IPI00128202.1 | Eif3h Eukaryotic translation initiation factor 3 subunit H                    | 4 | 13.92 | 3   |
| 2334 | IPI:IPI00308545.1 | Cam1 Calcium signal-modulating cyclophilin ligand                             | 4 | 15.99 | 3   |
| 2335 | IPI:IPI00225254.6 | Mtx2 Metaxin-2                                                                | 4 | 12.93 | 3   |
| 2336 | IPI:IPI00130489.1 | Rab35 Ras-related protein Rab-35                                              | 4 | 27.86 | 6   |
| 2337 | IPI:IPI00403055.1 | Psmf1 Proteasome inhibitor PI31 subunit                                       | 4 | 8.118 | 2   |
| 2338 | IPI:IPI00269613.6 | Eif3i Eukaryotic translation initiation factor 3 subunit I                    | 4 | 8.308 | 2   |
| 2339 | IPI:IPI00229604.4 | Cherp calcium homeostasis endoplasmic reticulum protein                       | 4 | 3.838 | 2   |
| 2340 | IPI:IPI00113362.2 | Crkl Crk-like protein                                                         | 4 | 10.56 | 3   |
| 2341 | IPI:IPI00459442.1 | Rtn1 reticulon-1 isoform RTN1-C                                               | 4 | 19.71 | 5   |
| 2342 | IPI:IPI00318671.2 | Ehd4 EH-domain containing 4-KJR (Fragment)                                    | 4 | 5.331 | 3   |
| 2343 | IPI:IPI00266188.6 | Cfl2 Cofilin-2                                                                | 4 | 38.55 | 6   |
| 2344 | IPI:IPI00130331.3 | L2hgdh L-2-hydroxyglutarate dehydrogenase, mitochondrial                      | 4 | 6.034 | 3   |
| 2345 | IPI:IPI00850434.1 | Gm13292 similar to Glyceraldehyde-3-phosphate dehydrogenase (GAPDH) isoform 1 | 4 | 78.38 | 198 |
| 2346 | IPI:IPI00750595.2 | Myl9 Myosin regulatory light polypeptide 9                                    | 4 | 48.26 | 8   |
| 2347 | IPI:IPI00284119.7 | Tnnc2 Troponin C, skeletal muscle                                             | 4 | 22.5  | 4   |
| 2348 | IPI:IPI00130640.5 | Hrsp12 Ribonuclease UK114                                                     | 4 | 31.85 | 3   |
| 2349 | IPI:IPI00116649.1 | Cnn2 Calponin-2                                                               | 4 | 14.43 | 3   |
| 2350 | IPI:IPI00224252.5 | Sel1l Isoform 2 of Protein sel-1 homolog 1                                    | 4 | 6.081 | 2   |
| 2351 | IPI:IPI00119676.1 | Apoc1 Apolipoprotein C-I                                                      | 4 | 26.14 | 2   |
| 2352 | IPI:IPI00555150.2 | Snx3 Sorting nexin-3                                                          | 4 | 14.81 | 4   |
| 2353 | IPI:IPI00134784.6 | Lsm4 U6 snRNA-associated Sm-like protein LSm4                                 | 4 | 19.71 | 3   |
| 2354 | IPI:IPI00128424.1 | Dr1 Protein Dr1                                                               | 4 | 21.02 | 2   |
| 2355 | IPI:IPI00137731.5 | Stam Putative uncharacterized protein                                         | 4 | 10.85 | 3   |
| 2356 | IPI:IPI00109089.1 | Bag4 BAG family molecular chaperone regulator 4                               | 4 | 6.127 | 2   |
| 2357 | IPI:IPI00752486.1 | Cst3 Cystatin C                                                               | 4 | 26.47 | 2   |
| 2358 | IPI:IPI00653528.2 | Myeov2 Myeloma-overexpressed gene 2 protein homolog                           | 4 | 100   | 2   |
| 2359 | IPI:IPI00624030.3 | Rpe Ribulose-5-phosphate-3-epimerase, isoform CRA_e                           | 4 | 17.45 | 3   |
| 2360 | IPI:IPI00752289.2 | Gm10290 Glyceraldehyde-3-phosphate dehydrogenase                              | 4 | 74.77 | 133 |
| 2361 | IPI:IPI00331334.3 | Bag3 BAG family molecular chaperone regulator 3                               | 4 | 4.159 | 2   |
| 2362 | IPI:IPI00845862.1 | 1810014F10Rik Isoform 3 of Protein fucU homolog                               | 4 | 23.08 | 2   |
| 2363 | IPI:IPI00222053.1 | Neo1 Isoform 4 of Neogenin                                                    | 4 | 2.699 | 2   |
| 2364 | IPI:IPI00761937.1 | Ubp2l Isoform 1 of Ubiquitin-associated protein 2-like                        | 4 | 3.071 | 2   |



|      |                   |                                                                                            |      |       |     |
|------|-------------------|--------------------------------------------------------------------------------------------|------|-------|-----|
| 2365 | IPI:IPI00153702.2 | Pthr2 peptidyl-tRNA hydrolase 2, mitochondrial isoform a                                   | 4    | 19.78 | 2   |
| 2366 | IPI:IPI00110716.1 | Fip111 Isoform 1 of Pre-mRNA 3'-end-processing factor FIP1                                 | 4    | 7.917 | 2   |
| 2367 | IPI:IPI00462115.3 | 1810035L17Rik Isoform 2 of SRA stem-loop-interacting RNA-binding protein, mitochondrial    | 4    | 41.41 | 4   |
| 2368 | IPI:IPI00849235.1 | Dynlt1-ps1 similar to tctex-1 protein isoform 2                                            | 4    | 39.22 | 2   |
| 2369 | IPI:IPI00115763.2 | Syng1 Isoform 1A of Synaptogyrin-1                                                         | 4    | 9.402 | 2   |
| 2370 | IPI:IPI00849046.1 | Gm10327;LOC100046806 similar to Glyceraldehyde-3-phosphate dehydrogenase (GAPDH) isoform 1 | 4    | 76.88 | 139 |
| 2371 | IPI:IPI00133553.1 | Mut Methylmalonyl-CoA mutase, mitochondrial                                                | 4    | 2.807 | 2   |
| 2372 | IPI:IPI00229475.1 | Jup Junction plakoglobin                                                                   | 4    | 4.832 | 2   |
| 2373 | IPI:IPI00880689.1 | Rpl24 Putative uncharacterized protein                                                     | 4    | 15.79 | 2   |
| 2374 | IPI:IPI00606647.3 | Bcl2l13 bcl-2-like protein 13                                                              | 3.98 | 8.756 | 2   |
| 2375 | IPI:IPI00108388.1 | Usp9x Probable ubiquitin carboxyl-terminal hydrolase FAF-X                                 | 3.97 | 3.009 | 8   |
| 2376 | IPI:IPI00886005.1 | Mapk8ip3 C-jun-amino-terminal kinase-interacting protein 3 isoform g                       | 3.97 | 2.154 | 2   |
| 2377 | IPI:IPI00116221.2 | Lactb2 Beta-lactamase-like protein 2                                                       | 3.97 | 9.028 | 2   |
| 2378 | IPI:IPI00673669.2 | Srsf5 Putative uncharacterized protein                                                     | 3.96 | 25.56 | 9   |
| 2379 | IPI:IPI00120546.1 | Praf2 PRA1 family protein 2                                                                | 3.96 | 16.29 | 2   |
| 2380 | IPI:IPI00115056.1 | Trappc3 Trafficking protein particle complex subunit 3                                     | 3.96 | 8.889 | 2   |
| 2381 | IPI:IPI00648852.2 | Ppt1 Putative uncharacterized protein                                                      | 3.94 | 10.6  | 2   |
| 2382 | IPI:IPI00944062.1 | Tjp1 tight junction protein ZO-1 isoform 2                                                 | 3.94 | 2.255 | 2   |
| 2383 | IPI:IPI00828225.1 | Bcap31 B-cell receptor-associated protein 31, isoform CRA_c                                | 3.93 | 12.65 | 3   |
| 2384 | IPI:IPI00173343.3 | Rexo2 Oligoribonuclease, mitochondrial (Fragment)                                          | 3.93 | 9.283 | 2   |
| 2385 | IPI:IPI00403909.2 | Armc6 Isoform 1 of Armadillo repeat-containing protein 6                                   | 3.92 | 6.838 | 2   |
| 2386 | IPI:IPI00222546.5 | Rpl22;LOC100047372 60S ribosomal protein L22                                               | 3.91 | 18.75 | 3   |
| 2387 | IPI:IPI00830364.1 | Htra2 Uncharacterized protein                                                              | 3.91 | 14.4  | 3   |
| 2388 | IPI:IPI00755549.2 | Gfpt1 Isoform 2 of Glucosamine--fructose-6-phosphate aminotransferase [isomerizing] 1      | 3.91 | 5.14  | 3   |
| 2389 | IPI:IPI00406596.4 | Gapvd1 Isoform 2 of GTPase-activating protein and VPS9 domain-containing protein 1         | 3.9  | 2.296 | 2   |
| 2390 | IPI:IPI00112097.1 | Commd9 COMM domain-containing protein 9                                                    | 3.89 | 18.69 | 2   |
| 2391 | IPI:IPI00876109.1 | Prmt1 Prmt1 protein                                                                        | 3.89 | 11.3  | 3   |
| 2392 | IPI:IPI00927961.1 | Fyn Uncharacterized protein                                                                | 3.89 | 3.32  | 3   |
| 2393 | IPI:IPI00123319.1 | Tpm2 Isoform 1 of Tropomyosin beta chain                                                   | 3.88 | 32.04 | 13  |
| 2394 | IPI:IPI00110363.1 | Cpsf1 Cleavage and polyadenylation specificity factor subunit 1                            | 3.87 | 2.845 | 5   |

|      |                   |                                                                                                                                        |      |       |   |
|------|-------------------|----------------------------------------------------------------------------------------------------------------------------------------|------|-------|---|
| 2395 | IPI:IPI00115875.8 | Pi4ka phosphatidylinositol 4-kinase type 3 alpha                                                                                       | 3.87 | 3.18  | 4 |
| 2396 | IPI:IPI00330094.4 | Cpt1a Carnitine O-palmitoyltransferase 1, liver isoform                                                                                | 3.87 | 5.175 | 2 |
| 2397 | IPI:IPI00753044.1 | Arc3 Uncharacterized protein                                                                                                           | 3.86 | 10.59 | 3 |
| 2398 | IPI:IPI00118769.2 | Rgs7 Rgs7 protein                                                                                                                      | 3.86 | 7.234 | 2 |
| 2399 | IPI:IPI00420143.1 | Usp47 Isoform 2 of Ubiquitin carboxyl-terminal hydrolase 47                                                                            | 3.85 | 2.507 | 3 |
| 2400 | IPI:IPI00120427.1 | Rtn2 Isoform 1 of Reticulon-2                                                                                                          | 3.85 | 5.308 | 2 |
| 2401 | IPI:IPI00137668.1 | Hdac2 Histone deacetylase 2                                                                                                            | 3.84 | 10.25 | 4 |
| 2402 | IPI:IPI00110659.2 | Dhrs7 Dehydrogenase/reductase SDR family member 7                                                                                      | 3.83 | 11.24 | 3 |
| 2403 | IPI:IPI00551412.1 | Magoh Protein mago nashi homolog                                                                                                       | 3.83 | 19.18 | 2 |
| 2404 | IPI:IPI00884502.1 | Crx cone-rod homeobox protein isoform 2                                                                                                | 3.83 | 7.43  | 2 |
| 2405 | IPI:IPI00132958.1 | Acot13 Acyl-coenzyme A thioesterase 13                                                                                                 | 3.83 | 17.86 | 2 |
| 2406 | IPI:IPI00410800.1 | Nup93 Isoform 2 of Nuclear pore complex protein Nup93                                                                                  | 3.82 | 3.879 | 3 |
| 2407 | IPI:IPI00405760.2 | Sup2 Putative splicing factor, arginine/serine-rich 14                                                                                 | 3.82 | 3.655 | 3 |
| 2408 | IPI:IPI00461621.1 | Snrnp40 U5 small nuclear ribonucleoprotein 40 kDa protein                                                                              | 3.82 | 8.101 | 3 |
| 2409 | IPI:IPI00123589.1 | Ubxn1 UBX domain-containing protein 1                                                                                                  | 3.82 | 15.49 | 3 |
| 2410 | IPI:IPI00556699.1 | Gcsh Putative uncharacterized protein                                                                                                  | 3.82 | 17.65 | 2 |
| 2411 | IPI:IPI00227455.2 | Kctd8 Isoform 1 of BTB/POZ domain-containing protein KCTD8                                                                             | 3.82 | 5.882 | 4 |
| 2412 | IPI:IPI00856334.1 | Uba6 Uncharacterized protein                                                                                                           | 3.81 | 3.62  | 3 |
| 2413 | IPI:IPI00316184.1 | Bcas2 Pre-mRNA-splicing factor SPF27                                                                                                   | 3.8  | 13.33 | 3 |
| 2414 | IPI:IPI00405390.1 | Nudt9 ADP-ribose pyrophosphatase, mitochondrial                                                                                        | 3.8  | 7.429 | 2 |
| 2415 | IPI:IPI00876504.1 | Gstz1 Brain cDNA, clone MNCb-6148, similar to Mus musculus glutathione transferase zeta 1 (maleylacetoacetate isomerase) (Gstz1), mRNA | 3.8  | 15.81 | 3 |
| 2416 | IPI:IPI00277446.5 | Bat3 Putative uncharacterized protein (Fragment)                                                                                       | 3.8  | 2.437 | 2 |
| 2417 | IPI:IPI00755329.1 | Ssr1 Translocon-associated protein subunit alpha                                                                                       | 3.8  | 8.042 | 2 |
| 2418 | IPI:IPI00623834.1 | Ampd2 Adenosine monophosphate deaminase 2 (Isoform L), isoform CRA_a                                                                   | 3.8  | 3.034 | 2 |
| 2419 | IPI:IPI00314153.4 | Yars Tyrosyl-tRNA synthetase                                                                                                           | 3.8  | 5.319 | 3 |
| 2420 | IPI:IPI00886236.1 | Dcakd Dephospho-CoA kinase domain-containing protein                                                                                   | 3.79 | 16.02 | 3 |
| 2421 | IPI:IPI00408059.4 | Ppp2r5c serine/threonine-protein phosphatase 2A 56 kDa regulatory subunit gamma isoform isoform d                                      | 3.79 | 4.991 | 2 |
| 2422 | IPI:IPI00230013.3 | Cacna2d1 Isoform 2B of Voltage-dependent calcium channel subunit alpha-2/delta-1                                                       | 3.78 | 4.797 | 4 |
| 2423 | IPI:IPI00408543.5 | Clip2 Isoform 2 of CAP-Gly domain-containing linker protein 2                                                                          | 3.78 | 5.237 | 4 |
| 2424 | IPI:IPI00315463.4 | Reep5 receptor expression-enhancing protein 5                                                                                          | 3.77 | 11.64 | 3 |

|      |                   |                                                                              |      |       |   |
|------|-------------------|------------------------------------------------------------------------------|------|-------|---|
| 2425 | IPI:IPI00124600.4 | Slc15a2 solute carrier family 15 member 2 isoform 1                          | 3.77 | 2.162 | 2 |
| 2426 | IPI:IPI00223196.5 | Tnni2 Troponin I, fast skeletal muscle                                       | 3.77 | 17.03 | 2 |
| 2427 | IPI:IPI00753990.1 | Nudt3;LOC100047647 Nudix (Nucleotide diphosphate linked moiety X)-type motif | 3.76 | 26.62 | 2 |
| 2428 | IPI:IPI00880948.1 | Acad5b 52 kDa protein                                                        | 3.76 | 11.4  | 2 |
| 2429 | IPI:IPI00119945.1 | Nit2 Omega-amidase NIT2                                                      | 3.75 | 11.96 | 2 |
| 2430 | IPI:IPI00788387.1 | Mfge8 lactadherin isoform 1                                                  | 3.75 | 4.32  | 2 |
| 2431 | IPI:IPI00850525.1 | Upf1 Isoform 2 of Regulator of nonsense transcripts 1                        | 3.75 | 3.774 | 4 |
| 2432 | IPI:IPI00319270.2 | Plin3 Perilipin-3                                                            | 3.75 | 9.382 | 3 |
| 2433 | IPI:IPI00399943.3 | Arcp5 Actin-related protein 2/3 complex subunit 5                            | 3.75 | 27.17 | 2 |
| 2434 | IPI:IPI00277028.4 | Cobra1 Negative elongation factor B                                          | 3.74 | 8.793 | 4 |
| 2435 | IPI:IPI00222937.1 | Hspa13 Isoform 1 of Heat shock 70 kDa protein 13                             | 3.74 | 5.732 | 3 |
| 2436 | IPI:IPI00875089.1 | L1cam Uncharacterized protein                                                | 3.74 | 3.962 | 4 |
| 2437 | IPI:IPI00136563.4 | Cpt1b Carnitine O-palmitoyltransferase 1, muscle isoform                     | 3.72 | 2.591 | 3 |
| 2438 | IPI:IPI00670422.2 | - hypothetical protein isoform 2                                             | 3.71 | 13.71 | 2 |
| 2439 | IPI:IPI00953783.2 | Mthfd1 C-1-tetrahydrofolate synthase, cytoplasmic                            | 3.7  | 3.636 | 3 |
| 2440 | IPI:IPI00315187.5 | 2400001E08Rik RhoA activator C11orf59 homolog                                | 3.7  | 15.53 | 2 |
| 2441 | IPI:IPI00317074.3 | Slc25a10 Mitochondrial dicarboxylate carrier                                 | 3.7  | 13.59 | 3 |
| 2442 | IPI:IPI00263313.1 | Drg1 Developmentally-regulated GTP-binding protein 1                         | 3.7  | 7.357 | 2 |
| 2443 | IPI:IPI00127556.1 | Ncam2 Isoform Long of Neural cell adhesion molecule 2                        | 3.7  | 3.465 | 2 |
| 2444 | IPI:IPI00118173.1 | Aoc3 Isoform 1 of Membrane primary amine oxidase                             | 3.69 | 2.745 | 2 |
| 2445 | IPI:IPI00652722.1 | Slc27a1 Putative uncharacterized protein                                     | 3.68 | 3.975 | 2 |
| 2446 | IPI:IPI00623819.1 | Hspb1 Isoform C of Heat shock protein beta-1                                 | 3.68 | 18.86 | 2 |
| 2447 | IPI:IPI00331549.1 | Dhrs1 Dehydrogenase/reductase SDR family member 1                            | 3.68 | 13.42 | 2 |
| 2448 | IPI:IPI00139637.1 | Copz1 Coatamer subunit zeta-1                                                | 3.68 | 16.95 | 3 |
| 2449 | IPI:IPI00459652.3 | Ftsjd2 Cap-specific mRNA (nucleoside-2'-O)-methyltransferase 1               | 3.67 | 3.823 | 3 |
| 2450 | IPI:IPI00387377.1 | Srp54a Isoform 1 of Signal recognition particle 54 kDa protein               | 3.67 | 7.341 | 2 |
| 2451 | IPI:IPI00222977.1 | Srp68 Signal recognition particle 68 kDa protein                             | 3.66 | 7.36  | 4 |
| 2452 | IPI:IPI00112339.9 | Lima1 LIM domain and actin-binding protein 1 isoform a                       | 3.66 | 4.382 | 2 |
| 2453 | IPI:IPI00331111.1 | Ccbl1 Kynurenine--oxoglutarate transaminase 1                                | 3.66 | 7.547 | 2 |
| 2454 | IPI:IPI00467914.3 | H1f0 Histone H1.0                                                            | 3.65 | 10.82 | 3 |
| 2455 | IPI:IPI00321005.5 | Trim32 E3 ubiquitin-protein ligase TRIM32                                    | 3.65 | 5.496 | 4 |
| 2456 | IPI:IPI00116843.1 | mt-Nd4 NADH-ubiquinone oxidoreductase chain 4                                | 3.64 | 5.882 | 2 |

|      |                   |                                                                                   |      |       |   |
|------|-------------------|-----------------------------------------------------------------------------------|------|-------|---|
| 2457 | IPI:IPI00776182.2 | Slc9a6 Sodium/hydrogen exchanger                                                  | 3.64 | 4.627 | 2 |
| 2458 | IPI:IPI00153987.4 | Rnf214 Isoform 2 of RING finger protein 214                                       | 3.63 | 5.292 | 2 |
| 2459 | IPI:IPI00469548.2 | Syn2 Isoform IIa of Synapsin-2                                                    | 3.62 | 6.143 | 3 |
| 2460 | IPI:IPI00128230.1 | Mta2 Metastasis-associated protein MTA2                                           | 3.62 | 3.443 | 2 |
| 2461 | IPI:IPI00755389.2 | Prpsap1 phosphoribosyl pyrophosphate synthetase-associated protein 1              | 3.62 | 16.36 | 4 |
| 2462 | IPI:IPI00225192.1 | Nup54 Nuclear pore complex protein Nup54                                          | 3.61 | 5.098 | 2 |
| 2463 | IPI:IPI00119039.1 | Cnpy3 Isoform 1 of Protein canopy homolog 3                                       | 3.61 | 9.783 | 3 |
| 2464 | IPI:IPI00462291.5 | Hmgb2 High mobility group protein B2                                              | 3.61 | 21.43 | 5 |
| 2465 | IPI:IPI00474446.4 | Eif2s1 Eukaryotic translation initiation factor 2 subunit 1                       | 3.61 | 10.48 | 3 |
| 2466 | IPI:IPI00875171.1 | Fam120c Isoform 2 of Constitutive coactivator of PPAR-gamma-like protein 2        | 3.6  | 9.322 | 2 |
| 2467 | IPI:IPI00466881.6 | Tnnt3 Isoform A6e17 of Troponin T, fast skeletal muscle                           | 3.59 | 14.12 | 4 |
| 2468 | IPI:IPI00881566.1 | Kif3a kinesin-like protein KIF3A                                                  | 3.59 | 3.852 | 2 |
| 2469 | IPI:IPI00224728.1 | Cd63 Putative uncharacterized protein                                             | 3.59 | 8.434 | 2 |
| 2470 | IPI:IPI00221725.2 | Coro2b Coronin-2B                                                                 | 3.59 | 7.708 | 3 |
| 2471 | IPI:IPI00380829.4 | Trip11 thyroid hormone receptor interactor 11                                     | 3.59 | 1.063 | 2 |
| 2472 | IPI:IPI00308484.3 | Sparcl1 SPARC-like protein 1                                                      | 3.57 | 3.692 | 2 |
| 2473 | IPI:IPI00890027.1 | Lgals3 19 kDa protein                                                             | 3.57 | 26.51 | 4 |
| 2474 | IPI:IPI00469933.3 | Smek1 Isoform 1 of Serine/threonine-protein phosphatase 4 regulatory subunit 3A   | 3.56 | 3.171 | 2 |
| 2475 | IPI:IPI00131994.1 | Ndufb2 NADH dehydrogenase [ubiquinone] 1 beta subcomplex subunit 2, mitochondrial | 3.54 | 16.19 | 2 |
| 2476 | IPI:IPI00336958.3 | Zc3h15 Isoform 1 of Zinc finger CCCH domain-containing protein 15                 | 3.54 | 6.573 | 3 |
| 2477 | IPI:IPI00620256.3 | Lmna Isoform A of Prelamin-A/C                                                    | 3.54 | 4.511 | 3 |
| 2478 | IPI:IPI00122100.1 | Tceal1 Transcription elongation factor A protein-like 1                           | 3.54 | 18.79 | 2 |
| 2479 | IPI:IPI00115850.2 | Idi1;LOC100044783 isopentenyl-diphosphate Delta-isomerase 1                       | 3.53 | 10.95 | 2 |
| 2480 | IPI:IPI00621460.2 | Ap1g1 AP-1 complex subunit gamma-1                                                | 3.53 | 4.745 | 4 |
| 2481 | IPI:IPI00222228.5 | 4732456N10Rik hypothetical protein LOC239673                                      | 3.53 | 7.435 | 5 |
| 2482 | IPI:IPI00314984.4 | Srsf10 Putative uncharacterized protein                                           | 3.53 | 14.84 | 2 |
| 2483 | IPI:IPI00677130.2 | Myof Isoform 2 of Myoferlin                                                       | 3.52 | 3.583 | 3 |
| 2484 | IPI:IPI00265358.1 | Dhx38 Putative uncharacterized protein                                            | 3.52 | 2.524 | 2 |
| 2485 | IPI:IPI00660556.1 | Ddx46 Isoform 2 of Probable ATP-dependent RNA helicase DDX46                      | 3.52 | 3.116 | 2 |
| 2486 | IPI:IPI00279218.1 | Apeh Isoform 2 of Acylamino-acid-releasing enzyme                                 | 3.52 | 4.603 | 2 |
| 2487 | IPI:IPI00776324.1 | Trim2 Putative uncharacterized protein                                            | 3.51 | 7.706 | 3 |
| 2488 | IPI:IPI00387217.1 | Cul2 Isoform 2 of Cullin-2                                                        | 3.51 | 3.541 | 2 |
| 2489 | IPI:IPI00310518.3 | Ccdc47 Isoform 1 of Coiled-coil domain-containing                                 | 3.51 | 3.727 | 2 |

|      |                   |                                                                           |      |       |   |
|------|-------------------|---------------------------------------------------------------------------|------|-------|---|
|      |                   | protein 47                                                                |      |       |   |
| 2490 | IPI:IPI00120848.1 | Ogn Mimecan                                                               | 3.5  | 11.74 | 2 |
| 2491 | IPI:IPI00420152.3 | Ttyh1 Isoform 4 of Protein tweety homolog 1                               | 3.5  | 8.261 | 3 |
| 2492 | IPI:IPI00850156.1 | Mia3 Isoform 3 of Melanoma inhibitory activity protein 3                  | 3.49 | 4.609 | 2 |
| 2493 | IPI:IPI00111020.1 | Prcc papillary renal cell carcinoma translocation-associated gene product | 3.49 | 3.666 | 2 |
| 2494 | IPI:IPI00753456.1 | Rps24 Isoform 3 of 40S ribosomal protein S24                              | 3.48 | 26.72 | 3 |
| 2495 | IPI:IPI00415385.1 | Bclaf1 Isoform 1 of Bcl-2-associated transcription factor 1               | 3.48 | 3.482 | 2 |
| 2496 | IPI:IPI00138860.3 | Golga4 Golgin subfamily A member 4                                        | 3.48 | 1.564 | 4 |
| 2497 | IPI:IPI00129268.1 | Gng3 Guanine nucleotide-binding protein G(I)/G(S)/G(O) subunit gamma-3    | 3.47 | 49.33 | 2 |
| 2498 | IPI:IPI00874453.1 | Sh3bgrl2 SH3 domain-binding glutamic acid-rich-like protein 2             | 3.46 | 18.69 | 2 |
| 2499 | IPI:IPI00757517.1 | Ttc7b tetratricopeptide repeat domain 7B                                  | 3.45 | 3.084 | 2 |
| 2500 | IPI:IPI00132659.1 | Rwdd1 RWD domain-containing protein 1                                     | 3.45 | 10.29 | 2 |
| 2501 | IPI:IPI00122862.4 | Mthfd1 C-1-tetrahydrofolate synthase, cytoplasmic                         | 3.45 | 2.567 | 2 |
| 2502 | IPI:IPI00127501.1 | Grcc10 Protein C10                                                        | 3.43 | 28.57 | 3 |
| 2503 | IPI:IPI00116896.1 | mt-Atp8 ATP synthase protein 8                                            | 3.42 | 23.88 | 2 |
| 2504 | IPI:IPI00270110.4 | Cab39l Isoform 1 of Calcium-binding protein 39-like                       | 3.42 | 7.715 | 3 |
| 2505 | IPI:IPI00848519.1 | LOC100039215 similar to translin associated protein X isoform 1           | 3.4  | 33.43 | 8 |
| 2506 | IPI:IPI00877323.1 | Cab39 calcium-binding protein 39                                          | 3.4  | 6.745 | 3 |
| 2507 | IPI:IPI00137706.1 | Mpp1 55 kDa erythrocyte membrane protein                                  | 3.39 | 7.511 | 2 |
| 2508 | IPI:IPI00221663.5 | Bpgm Bisphosphoglycerate mutase                                           | 3.39 | 9.266 | 3 |
| 2509 | IPI:IPI00875550.1 | Ube2o ubiquitin-conjugating enzyme E2 O                                   | 3.39 | 4.581 | 3 |
| 2510 | IPI:IPI00751818.1 | Galk2 N-acetylgalactosamine kinase                                        | 3.38 | 5.369 | 2 |
| 2511 | IPI:IPI00110100.1 | Armc1 Armadillo repeat-containing protein 1                               | 3.38 | 12.77 | 2 |
| 2512 | IPI:IPI00830314.1 | Sdr39u1 Isoform 1 of Epimerase family protein SDR39U1                     | 3.38 | 9.091 | 3 |
| 2513 | IPI:IPI00454151.1 | Cnbp Isoform 3 of Cellular nucleic acid-binding protein                   | 3.37 | 12.99 | 2 |
| 2514 | IPI:IPI00154082.2 | Sf3b4 Splicing factor 3B subunit 4                                        | 3.36 | 10.14 | 2 |
| 2515 | IPI:IPI00122399.1 | Glg1 Golgi apparatus protein 1                                            | 3.35 | 1.787 | 2 |
| 2516 | IPI:IPI00226608.2 | Tbcel Isoform 2 of Tubulin-specific chaperone cofactor E-like protein     | 3.35 | 7.466 | 2 |
| 2517 | IPI:IPI00109455.3 | Nudt16 U8 snoRNA-decapping enzyme                                         | 3.35 | 11.28 | 2 |
| 2518 | IPI:IPI00131693.2 | Cntfr Ciliary neurotrophic factor receptor subunit alpha                  | 3.35 | 13.44 | 2 |
| 2519 | IPI:IPI00409045.2 | Ensa Isoform 1 of Alpha-endosulfine                                       | 3.34 | 14.88 | 2 |
| 2520 | IPI:IPI00124819.1 | Coro1b Coronin-1B                                                         | 3.34 | 17.36 | 4 |

|      |                   |                                                                          |      |       |   |
|------|-------------------|--------------------------------------------------------------------------|------|-------|---|
| 2521 | IPI:IPI00648905.1 | Wbp2 WW domain binding protein 2, isoform CRA_a                          | 3.34 | 11.57 | 3 |
| 2522 | IPI:IPI00885793.1 | Fga fibrinogen, alpha polypeptide isoform 1                              | 3.34 | 3.169 | 2 |
| 2523 | IPI:IPI00132388.3 | Bzw1 Basic leucine zipper and W2 domain-containing protein 1             | 3.33 | 8.115 | 3 |
| 2524 | IPI:IPI00462157.1 | Trim72 Tripartite motif-containing protein 72                            | 3.33 | 9.015 | 2 |
| 2525 | IPI:IPI00556893.3 | Gm10093 Uncharacterized protein                                          | 3.33 | 3.734 | 2 |
| 2526 | IPI:IPI00112493.2 | Apool Apolipoprotein O-like                                              | 3.32 | 12.08 | 2 |
| 2527 | IPI:IPI00124709.3 | Rps27l 40S ribosomal protein S27-like                                    | 3.32 | 38.1  | 4 |
| 2528 | IPI:IPI00928541.1 | Rbm25 Isoform 2 of RNA-binding protein 25                                | 3.32 | 5.489 | 3 |
| 2529 | IPI:IPI00318012.6 | Itfg1 T-cell immunomodulatory protein                                    | 3.31 | 7.213 | 3 |
| 2530 | IPI:IPI00319369.1 | Tbl2 Transducin (Beta)-like 2                                            | 3.31 | 5.43  | 2 |
| 2531 | IPI:IPI00848728.1 | LOC100045132 similar to polyglutamine-containing protein                 | 3.31 | 4.322 | 2 |
| 2532 | IPI:IPI00263822.7 | Prkacb Isoform 1 of cAMP-dependent protein kinase catalytic subunit beta | 3.3  | 30.2  | 9 |
| 2533 | IPI:IPI00111960.2 | Gaa Lysosomal alpha-glucosidase                                          | 3.3  | 3.253 | 2 |
| 2534 | IPI:IPI00896672.1 | Prpf4b serine/threonine-protein kinase PRP4 homolog                      | 3.29 | 2.88  | 3 |
| 2535 | IPI:IPI00465809.2 | Kif3b Kinesin-like protein KIF3B                                         | 3.29 | 5.489 | 2 |
| 2536 | IPI:IPI00130883.1 | Rbm3 Putative RNA-binding protein 3                                      | 3.28 | 18.3  | 5 |
| 2537 | IPI:IPI00761240.4 | 6330577E15Rik 34 kDa protein                                             | 3.28 | 6.931 | 2 |
| 2538 | IPI:IPI00130236.4 | Arih1 Protein ariadne-1 homolog                                          | 3.28 | 5.225 | 3 |
| 2539 | IPI:IPI00955735.1 | Exog nuclease EXOG, mitochondrial isoform 1 precursor                    | 3.27 | 8.673 | 3 |
| 2540 | IPI:IPI00131882.1 | Opn1mw Green-sensitive opsin                                             | 3.27 | 8.635 | 3 |
| 2541 | IPI:IPI00321739.1 | Akap8 A-kinase anchor protein 8                                          | 3.27 | 6.405 | 2 |
| 2542 | IPI:IPI00387421.1 | Wdr37 WD repeat-containing protein 37                                    | 3.26 | 6.653 | 2 |
| 2543 | IPI:IPI00272238.5 | Metap2 Methionine aminopeptidase                                         | 3.25 | 6.762 | 2 |
| 2544 | IPI:IPI00407764.6 | Dis3 Exosome complex exonuclease RRP44                                   | 3.25 | 2.714 | 2 |
| 2545 | IPI:IPI00122633.3 | Acsf2 Acyl-CoA synthetase family member 2, mitochondrial                 | 3.25 | 6.016 | 4 |
| 2546 | IPI:IPI00117056.1 | Osgep Probable O-sialoglycoprotein endopeptidase                         | 3.24 | 10.75 | 3 |
| 2547 | IPI:IPI00127237.1 | Pex14 Peroxisomal membrane protein PEX14                                 | 3.24 | 7.447 | 2 |
| 2548 | IPI:IPI00649302.5 | Alpl Alkaline phosphatase                                                | 3.24 | 4.962 | 2 |
| 2549 | IPI:IPI00850738.1 | LOC100046039 similar to histone deacetylase HD1                          | 3.24 | 3.974 | 2 |
| 2550 | IPI:IPI00911179.1 | Zfp207 zinc finger protein 207 isoform 4                                 | 3.24 | 6.304 | 2 |
| 2551 | IPI:IPI00132460.1 | Rpl26 60S ribosomal protein L26                                          | 3.23 | 12.41 | 2 |
| 2552 | IPI:IPI00876431.1 | Inpp4a Inpp4a protein                                                    | 3.22 | 3.24  | 2 |
| 2553 | IPI:IPI00135812.2 | Gtf2f2 General transcription factor IIF subunit 2                        | 3.22 | 15.26 | 3 |
| 2554 | IPI:IPI00387370.1 | Uap1 Isoform AGX2 of UDP-N-acetylhexosamine pyrophosphorylase            | 3.22 | 6.897 | 2 |

|      |                   |                                                                               |      |       |    |
|------|-------------------|-------------------------------------------------------------------------------|------|-------|----|
| 2555 | IPI:IPI00111343.1 | Ppie Peptidyl-prolyl cis-trans isomerase E                                    | 3.2  | 20.6  | 7  |
| 2556 | IPI:IPI00854952.1 | Slc30a9 Isoform 2 of Zinc transporter 9                                       | 3.2  | 7.715 | 2  |
| 2557 | IPI:IPI00113660.1 | Psme3 Proteasome activator complex subunit 3                                  | 3.2  | 21.65 | 6  |
| 2558 | IPI:IPI00754252.2 | Ahcyl2 putative adenosylhomocysteinase 3 isoform 2                            | 3.2  | 9.502 | 5  |
| 2559 | IPI:IPI00119227.1 | Ube2i;LOC100044900 SUMO-conjugating enzyme UBC9                               | 3.19 | 18.35 | 4  |
| 2560 | IPI:IPI00113310.3 | Tmem27 Collectrin                                                             | 3.19 | 13.06 | 2  |
| 2561 | IPI:IPI00856140.1 | Ppp1r2 Uncharacterized protein                                                | 3.18 | 23.59 | 2  |
| 2562 | IPI:IPI00749735.1 | Wbp2 Putative uncharacterized protein                                         | 3.18 | 4.598 | 2  |
| 2563 | IPI:IPI00669631.2 | Hmgb3 High mobility group box 3                                               | 3.17 | 22.01 | 3  |
| 2564 | IPI:IPI00831223.1 | Itn1 195 kDa protein                                                          | 3.17 | 2.676 | 3  |
| 2565 | IPI:IPI00134018.2 | 2410004B18Rik UPF0690 protein C1orf52 homolog                                 | 3.17 | 13.33 | 2  |
| 2566 | IPI:IPI00123196.1 | Dcn Decorin                                                                   | 3.17 | 6.215 | 2  |
| 2567 | IPI:IPI00475301.2 | LOC100045388 similar to Chain A, Crystal Structure Of Human Rangap1-Ubc9      | 3.17 | 11.21 | 3  |
| 2568 | IPI:IPI00222553.7 | Rps29;Gm14303 40S ribosomal protein S29                                       | 3.17 | 28.57 | 3  |
| 2569 | IPI:IPI00121322.2 | Etfdh Electron transfer flavoprotein-ubiquinone oxidoreductase, mitochondrial | 3.16 | 6.169 | 3  |
| 2570 | IPI:IPI00221741.1 | Tipr1 TIP41-like protein                                                      | 3.16 | 15.87 | 2  |
| 2571 | IPI:IPI00749669.1 | Slk Isoform 2 of STE20-like serine/threonine-protein kinase                   | 3.16 | 3.577 | 3  |
| 2572 | IPI:IPI00281011.7 | Marcks11 MARCKS-related protein                                               | 3.15 | 28    | 3  |
| 2573 | IPI:IPI00262488.9 | Crip1 Cysteine-rich protein 1                                                 | 3.15 | 12.99 | 2  |
| 2574 | IPI:IPI00755515.1 | Gm5160 Peptidyl-prolyl cis-trans isomerase                                    | 3.15 | 47.62 | 30 |
| 2575 | IPI:IPI00116414.2 | Sntb1 Isoform 1 of Beta-1-syntrophin                                          | 3.15 | 7.263 | 3  |
| 2576 | IPI:IPI00623970.3 | Htt Isoform Short of Huntingtin                                               | 3.14 | 1.742 | 3  |
| 2577 | IPI:IPI00313525.5 | Ncoa5 Nuclear receptor coactivator 5                                          | 3.14 | 8.027 | 2  |
| 2578 | IPI:IPI00127358.1 | Sh3bgrl3 SH3 domain-binding glutamic acid-rich-like protein 3                 | 3.14 | 31.18 | 2  |
| 2579 | IPI:IPI00759953.1 | Try5 trypsin 5                                                                | 3.13 | 16.67 | 18 |
| 2580 | IPI:IPI00124700.1 | Tfrc Transferrin receptor protein 1                                           | 3.13 | 3.801 | 3  |
| 2581 | IPI:IPI00762316.3 | Gnl1 Isoform 1 of Guanine nucleotide-binding protein-like 1                   | 3.13 | 6.919 | 3  |
| 2582 | IPI:IPI00929874.1 | 1300010F03Rik Isoform 2 of Uncharacterized protein KIAA0564 homolog           | 3.13 | 1.349 | 2  |
| 2583 | IPI:IPI00668276.3 | Gm4795 similar to Glyceraldehyde-3-phosphate dehydrogenase                    | 3.13 | 27.97 | 66 |
| 2584 | IPI:IPI00664246.4 | Nrbp1 Uncharacterized protein                                                 | 3.12 | 6.63  | 3  |
| 2585 | IPI:IPI00123519.6 | Arl6ip1 ADP-ribosylation factor-like protein 6-interacting protein 1          | 3.11 | 7.882 | 2  |
| 2586 | IPI:IPI00420724.4 | Bub3 Putative uncharacterized protein                                         | 3.11 | 9.509 | 3  |
| 2587 | IPI:IPI00858255.1 | Paip1 Protein                                                                 | 3.1  | 6.289 | 2  |
| 2588 | IPI:IPI00138131.3 | Th Tyrosine 3-monooxygenase                                                   | 3.1  | 9.639 | 2  |

|      |                   |                                                                               |      |       |    |
|------|-------------------|-------------------------------------------------------------------------------|------|-------|----|
| 2589 | IPI:IPI00169711.1 | Maoa Amine oxidase [flavin-containing] A                                      | 3.1  | 5.133 | 2  |
| 2590 | IPI:IPI00115257.1 | Psip1 Isoform 1 of PC4 and SFRS1-interacting protein                          | 3.09 | 6.818 | 5  |
| 2591 | IPI:IPI00461652.1 | Gm6404 Uncharacterized protein                                                | 3.09 | 12.82 | 2  |
| 2592 | IPI:IPI00319933.4 | Pascin3 Protein kinase C and casein kinase II substrate protein 3             | 3.08 | 4.953 | 2  |
| 2593 | IPI:IPI00329840.2 | Rad21 Double-strand-break repair protein rad21 homolog                        | 3.08 | 4.094 | 2  |
| 2594 | IPI:IPI00308984.6 | Eif1ax Eukaryotic translation initiation factor 1A, X-chromosomal             | 3.08 | 18.06 | 3  |
| 2595 | IPI:IPI00653841.1 | Capza1 Putative uncharacterized protein                                       | 3.08 | 23.1  | 4  |
| 2596 | IPI:IPI00625592.2 | Polr2a DNA-directed RNA polymerase                                            | 3.07 | 1.373 | 2  |
| 2597 | IPI:IPI00129356.1 | Itns1 Isoform 1 of Intersectin-1                                              | 3.07 | 1.634 | 2  |
| 2598 | IPI:IPI00762542.2 | Rps11 40S ribosomal protein S11                                               | 3.06 | 31.65 | 8  |
| 2599 | IPI:IPI00323349.2 | Tjp2 Tight junction protein ZO-2                                              | 3.06 | 2.913 | 2  |
| 2600 | IPI:IPI00880901.1 | Wdr61 Putative uncharacterized protein                                        | 3.05 | 10.39 | 2  |
| 2601 | IPI:IPI00649136.1 | Rpl26 Ribosomal protein L26                                                   | 3.05 | 17.48 | 2  |
| 2602 | IPI:IPI00322019.1 | Mgat5 Alpha-1,6-mannosylglycoprotein 6-beta-N-acetylglucosaminyltransferase A | 3.04 | 2.703 | 2  |
| 2603 | IPI:IPI00120046.1 | Xrn2 Isoform 1 of 5'-3' exoribonuclease 2                                     | 3.04 | 2.734 | 2  |
| 2604 | IPI:IPI00875164.1 | Inpp4b Type II inositol-3,4-bisphosphate 4-phosphatase                        | 3.03 | 3.571 | 2  |
| 2605 | IPI:IPI00137439.1 | Map2k6 Dual specificity mitogen-activated protein kinase kinase 6             | 3.02 | 6.287 | 2  |
| 2606 | IPI:IPI00877348.1 | Crygd gamma-crystallin D                                                      | 3.02 | 68.97 | 70 |
| 2607 | IPI:IPI00341322.3 | Ndufb6 NADH dehydrogenase [ubiquinone] 1 beta subcomplex subunit 6            | 3    | 19.53 | 2  |
| 2608 | IPI:IPI00624988.4 | Ctnn Putative uncharacterized protein                                         | 2.99 | 8.644 | 2  |
| 2609 | IPI:IPI00889878.1 | Srp54c Putative uncharacterized protein                                       | 2.99 | 7.371 | 2  |
| 2610 | IPI:IPI00127267.4 | Gldc Glycine dehydrogenase [decarboxylating], mitochondrial                   | 2.98 | 4.976 | 3  |
| 2611 | IPI:IPI00928561.1 | Arfgef1 Uncharacterized protein                                               | 2.98 | 2.372 | 2  |
| 2612 | IPI:IPI00123183.3 | Aqp1 Aquaporin-1                                                              | 2.97 | 10.78 | 2  |
| 2613 | IPI:IPI00131618.1 | Stx1a Syntaxin-1A                                                             | 2.96 | 11.81 | 3  |
| 2614 | IPI:IPI00625702.1 | Gm10269 Uncharacterized protein                                               | 2.96 | 15.45 | 2  |
| 2615 | IPI:IPI00890054.1 | Arl1 Putative uncharacterized protein                                         | 2.96 | 12.15 | 2  |
| 2616 | IPI:IPI00119478.1 | Tmod3 Tropomodulin-3                                                          | 2.95 | 9.943 | 2  |
| 2617 | IPI:IPI00136253.3 | Dnajb1 DnaJ homolog subfamily B member 1                                      | 2.95 | 7.941 | 3  |
| 2618 | IPI:IPI00317902.3 | Psmb5 Proteasome subunit beta type-5                                          | 2.93 | 15.15 | 5  |
| 2619 | IPI:IPI00134420.1 | Gdpd1 Glycerophosphodiester phosphodiesterase domain-containing protein 1     | 2.93 | 12.74 | 4  |
| 2620 | IPI:IPI00133776.1 | Mcee Methylmalonyl-CoA epimerase, mitochondrial                               | 2.93 | 17.98 | 2  |
| 2621 | IPI:IPI00153633.2 | Ctage5 cutaneous T-cell lymphoma-associated                                   | 2.93 | 4.156 | 2  |



|      |                   |                                                                              |      |       |    |
|------|-------------------|------------------------------------------------------------------------------|------|-------|----|
|      |                   | antigen 5 homolog isoform 1                                                  |      |       |    |
| 2622 | IPI:IPI00331236.4 | Setd7 Histone-lysine N-methyltransferase SETD7                               | 2.92 | 7.65  | 2  |
| 2623 | IPI:IPI00943373.1 | Fn3krp ketosamine-3-kinase                                                   | 2.92 | 12.62 | 3  |
| 2624 | IPI:IPI00276051.5 | Sin3a Isoform 1 of Paired amphipathic helix protein Sin3a                    | 2.92 | 1.962 | 2  |
| 2625 | IPI:IPI00762128.2 | Tst Uncharacterized protein                                                  | 2.91 | 6.757 | 2  |
| 2626 | IPI:IPI00345706.6 | Lactbl1 Uncharacterized protein                                              | 2.91 | 5.714 | 3  |
| 2627 | IPI:IPI00265345.1 | Prss34 Protease serine 34                                                    | 2.91 | 4.403 | 3  |
| 2628 | IPI:IPI00112668.1 | Commd8 COMM domain-containing protein 8                                      | 2.9  | 17.49 | 2  |
| 2629 | IPI:IPI00128791.1 | Hspb6 Heat shock protein beta-6                                              | 2.88 | 14.2  | 2  |
| 2630 | IPI:IPI00403780.1 | Rbm4 Isoform 2 of RNA-binding protein 4                                      | 2.88 | 10.71 | 2  |
| 2631 | IPI:IPI00473425.1 | Pcbp3 Pcbp3 protein                                                          | 2.88 | 77.51 | 28 |
| 2632 | IPI:IPI00114232.1 | Hdac1 Histone deacetylase 1                                                  | 2.88 | 3.734 | 2  |
| 2633 | IPI:IPI00880581.3 | Hagh Isoform 2 of Hydroxyacylglutathione hydrolase, mitochondrial            | 2.88 | 17.69 | 3  |
| 2634 | IPI:IPI00230150.1 | Snrpg;Gm8186 Small nuclear ribonucleoprotein G                               | 2.86 | 35.53 | 3  |
| 2635 | IPI:IPI00406302.2 | Serpina1a Alpha-1-antitrypsin 1-1                                            | 2.86 | 28.81 | 15 |
| 2636 | IPI:IPI00133491.1 | Phf5a PHD finger-like domain-containing protein 5A                           | 2.85 | 14.55 | 2  |
| 2637 | IPI:IPI00319509.5 | Anpep Aminopeptidase N                                                       | 2.84 | 2.174 | 2  |
| 2638 | IPI:IPI00344142.4 | Lin7a Protein lin-7 homolog A                                                | 2.84 | 31.33 | 7  |
| 2639 | IPI:IPI00402968.1 | Ehd2 EH domain-containing protein 2                                          | 2.84 | 6.446 | 4  |
| 2640 | IPI:IPI00849654.1 | - similar to Lsm6 protein                                                    | 2.83 | 18.27 | 2  |
| 2641 | IPI:IPI00473707.3 | Sept6 Isoform I of Septin-6                                                  | 2.83 | 4.918 | 2  |
| 2642 | IPI:IPI00858238.1 | Ndufa3 Uncharacterized protein                                               | 2.82 | 30    | 2  |
| 2643 | IPI:IPI00854018.1 | Celf2 Isoform 6 of CUGBP Elav-like family member 2                           | 2.82 | 6.489 | 4  |
| 2644 | IPI:IPI00761998.1 | Gm6900 hypothetical protein LOC628596                                        | 2.82 | 42.48 | 4  |
| 2645 | IPI:IPI00132122.3 | Smc3 Structural maintenance of chromosomes protein 3                         | 2.81 | 2.547 | 3  |
| 2646 | IPI:IPI00798614.1 | Mrpl15 Isoform 1 of 39S ribosomal protein L15, mitochondrial                 | 2.81 | 5.085 | 2  |
| 2647 | IPI:IPI00127227.2 | Cbr4 Carbonyl reductase family member 4                                      | 2.81 | 12.71 | 2  |
| 2648 | IPI:IPI00467442.4 | Tnnt3 Isoform 14 of Troponin T, fast skeletal muscle                         | 2.81 | 11.03 | 3  |
| 2649 | IPI:IPI00918580.1 | Pi4ka Protein                                                                | 2.8  | 10.31 | 2  |
| 2650 | IPI:IPI00889265.1 | Ncdn Isoform 2 of Neurochondrin                                              | 2.8  | 3.23  | 2  |
| 2651 | IPI:IPI00265386.5 | Faf2 Isoform 1 of FAS-associated factor 2                                    | 2.8  | 7.865 | 2  |
| 2652 | IPI:IPI00874856.1 | Efr3a Uncharacterized protein                                                | 2.8  | 3.541 | 2  |
| 2653 | IPI:IPI00848970.1 | Pgam5 Isoform 1 of Serine/threonine-protein phosphatase PGAM5, mitochondrial | 2.79 | 3.125 | 1  |
| 2654 | IPI:IPI00420718.4 | Hmgcs2 Hydroxymethylglutaryl-CoA synthase, mitochondrial                     | 2.79 | 7.087 | 2  |

|      |                   |                                                                                 |      |       |   |
|------|-------------------|---------------------------------------------------------------------------------|------|-------|---|
| 2655 | IPI:IPI00230241.6 | Atp5e ATP synthase subunit epsilon, mitochondrial                               | 2.79 | 53.85 | 5 |
| 2656 | IPI:IPI00227898.3 | Prkcb Protein kinase C beta type                                                | 2.79 | 7.132 | 4 |
| 2657 | IPI:IPI00895129.1 | Mybpc1 Uncharacterized protein                                                  | 2.78 | 2.484 | 2 |
| 2658 | IPI:IPI00856453.1 | Eif4g1 Eif4g1 protein                                                           | 2.78 | 1.545 | 3 |
| 2659 | IPI:IPI00116705.5 | Fabp4 Fatty acid-binding protein, adipocyte                                     | 2.77 | 13.64 | 3 |
| 2660 | IPI:IPI00118900.1 | Pde1b Calcium/calmodulin-dependent 3',5'-cyclic nucleotide phosphodiesterase 1B | 2.77 | 4.486 | 2 |
| 2661 | IPI:IPI00221464.2 | Rnf214 Isoform 1 of RING finger protein 214                                     | 2.76 | 4.341 | 2 |
| 2662 | IPI:IPI00928500.1 | Osgep 20 kDa protein                                                            | 2.76 | 15.59 | 2 |
| 2663 | IPI:IPI00762599.1 | Tsc22d2 TSC22 domain family, member 2                                           | 2.75 | 3.771 | 3 |
| 2664 | IPI:IPI00122826.1 | Cend1 Cell cycle exit and neuronal differentiation protein 1                    | 2.75 | 14.09 | 2 |
| 2665 | IPI:IPI00408243.1 | Ssbp1 single-stranded DNA-binding protein, mitochondrial isoform 1              | 2.75 | 16.22 | 2 |
| 2666 | IPI:IPI00230395.5 | Anxa1 Annexin A1                                                                | 2.75 | 10.4  | 3 |
| 2667 | IPI:IPI00115426.1 | Gm9174;Cdc26 Anaphase-promoting complex subunit CDC26                           | 2.75 | 12.94 | 1 |
| 2668 | IPI:IPI00606716.2 | Ptpn23 Isoform 2 of Tyrosine-protein phosphatase non-receptor type 23           | 2.73 | 2.189 | 2 |
| 2669 | IPI:IPI00165799.1 | Ubxn4 UBX domain-containing protein 4                                           | 2.72 | 7.312 | 2 |
| 2670 | IPI:IPI00785231.1 | Pnn pinin                                                                       | 2.71 | 6.345 | 3 |
| 2671 | IPI:IPI00463468.3 | Nop58 Nucleolar protein 58                                                      | 2.71 | 5.784 | 2 |
| 2672 | IPI:IPI00270877.5 | Usp14 Ubiquitin carboxyl-terminal hydrolase 14                                  | 2.69 | 8.925 | 3 |
| 2673 | IPI:IPI00127560.1 | Ttr Transthyretin                                                               | 2.69 | 20.41 | 2 |
| 2674 | IPI:IPI00227640.1 | Commd3 COMM domain-containing protein 3                                         | 2.69 | 10.77 | 2 |
| 2675 | IPI:IPI00652358.5 | Arsb Isoform 1 of Arylsulfatase B                                               | 2.69 | 4.12  | 2 |
| 2676 | IPI:IPI00849786.1 | LOC100045189 similar to transcription factor EF1                                | 2.68 | 24.31 | 7 |
| 2677 | IPI:IPI00890144.1 | Slc4a8 Isoform 2 of Electroneutral sodium bicarbonate exchanger 1               | 2.68 | 5.111 | 4 |
| 2678 | IPI:IPI00380392.1 | Rps6ka5 Isoform 1 of Ribosomal protein S6 kinase alpha-5                        | 2.68 | 4.762 | 2 |
| 2679 | IPI:IPI00896020.1 | Hp1bp3 Isoform 2 of Heterochromatin protein 1-binding protein 3                 | 2.68 | 3.512 | 2 |
| 2680 | IPI:IPI00116804.1 | Eif2b2 Translation initiation factor eIF-2B subunit beta                        | 2.68 | 10.26 | 2 |
| 2681 | IPI:IPI00648295.1 | Kdm1a Amine oxidase (Flavin containing) domain 2                                | 2.68 | 2.291 | 2 |
| 2682 | IPI:IPI00229990.7 | Strn3 Striatin-3                                                                | 2.67 | 4.774 | 2 |
| 2683 | IPI:IPI00648235.1 | Nt5c3 Isoform 1 of Cytosolic 5'-nucleotidase 3                                  | 2.67 | 9.764 | 2 |
| 2684 | IPI:IPI00969952.1 | Glb1l2 Beta-galactosidase                                                       | 2.67 | 3.378 | 2 |
| 2685 | IPI:IPI00848627.1 | Akt1;LOC100047666 RAC-alpha serine/threonine-protein kinase isoform 2           | 2.66 | 2.664 | 1 |
| 2686 | IPI:IPI00308136.3 | Vps33a vacuolar protein sorting-associated protein 33A                          | 2.65 | 3.01  | 2 |
| 2687 | IPI:IPI00461744.2 | Gorasp2 Golgi reassembly stacking protein 2,                                    | 2.65 | 9.977 | 4 |

|      |                   |                                                                                  |      |       |    |
|------|-------------------|----------------------------------------------------------------------------------|------|-------|----|
|      |                   | isoform CRA_d                                                                    |      |       |    |
| 2688 | IPI:IPI00969876.1 | Srrm1 serine/arginine repetitive matrix protein 1 isoform 1                      | 2.65 | 2.709 | 2  |
| 2689 | IPI:IPI00153201.1 | Gga1 ADP-ribosylation factor-binding protein GGA1                                | 2.64 | 3.465 | 3  |
| 2690 | IPI:IPI00323674.6 | Sart1 U4/U6.U5 tri-snRNP-associated protein 1                                    | 2.64 | 3.598 | 2  |
| 2691 | IPI:IPI00331040.1 | Plcd3 1-phosphatidylinositol-4,5-bisphosphate phosphodiesterase delta-3          | 2.64 | 4.586 | 2  |
| 2692 | IPI:IPI00850151.1 | LOC100047093 similar to Ubiquitin-conjugating enzyme UbcH2                       | 2.64 | 9.294 | 2  |
| 2693 | IPI:IPI00876416.1 | Bcar1 94 kDa protein                                                             | 2.64 | 5.034 | 2  |
| 2694 | IPI:IPI00462075.4 | Gm5507 similar to Glyceraldehyde-3-phosphate dehydrogenase                       | 2.63 | 67.16 | 92 |
| 2695 | IPI:IPI00556869.1 | Ptprd receptor-type tyrosine-protein phosphatase delta isoform A                 | 2.61 | 2.552 | 2  |
| 2696 | IPI:IPI00968397.1 | - Putative uncharacterized protein                                               | 2.61 | 17.19 | 2  |
| 2697 | IPI:IPI00411045.1 | Synm Isoform 2 of Synemin                                                        | 2.61 | 2.065 | 2  |
| 2698 | IPI:IPI00658539.1 | Ctsa lysosomal protective protein isoform a                                      | 2.6  | 3.252 | 2  |
| 2699 | IPI:IPI00169469.1 | Ccdc72;Gm15431 Coiled-coil domain-containing protein 72                          | 2.6  | 39.06 | 3  |
| 2700 | IPI:IPI00957112.1 | Capns1 calpain small subunit 1                                                   | 2.59 | 12.31 | 3  |
| 2701 | IPI:IPI00876174.1 | Akr1e1 28 kDa protein                                                            | 2.59 | 13.47 | 2  |
| 2702 | IPI:IPI00321581.4 | Snap29 Synaptosomal-associated protein 29                                        | 2.58 | 10.38 | 2  |
| 2703 | IPI:IPI00828479.1 | Acox1 Acyl-Coenzyme A oxidase 1, palmitoyl, isoform CRA_a                        | 2.57 | 4.236 | 2  |
| 2704 | IPI:IPI00222739.2 | Nrbp1 Nuclear receptor-binding protein                                           | 2.56 | 4.86  | 2  |
| 2705 | IPI:IPI00310669.3 | Dak Bifunctional ATP-dependent dihydroxyacetone kinase/FAD-AMP lyase (cyclizing) | 2.56 | 5.017 | 2  |
| 2706 | IPI:IPI00112335.1 | Map2k4 Dual specificity mitogen-activated protein kinase kinase 4                | 2.55 | 3.275 | 2  |
| 2707 | IPI:IPI00124073.1 | Nxn Isoform 1 of Nucleoredoxin                                                   | 2.55 | 9.655 | 2  |
| 2708 | IPI:IPI00853739.1 | Gm4492 similar to gag                                                            | 2.55 | 5.772 | 2  |
| 2709 | IPI:IPI00886106.1 | Khk 38 kDa protein                                                               | 2.54 | 5.539 | 2  |
| 2710 | IPI:IPI00281109.3 | Myom1 Isoform 2 of Myomesin-1                                                    | 2.53 | 1.721 | 2  |
| 2711 | IPI:IPI00458908.2 | Prpf4 U4/U6 small nuclear ribonucleoprotein Prp4                                 | 2.52 | 4.031 | 2  |
| 2712 | IPI:IPI00111946.1 | 1810009N02Rik Putative uncharacterized protein                                   | 2.52 | 12.02 | 2  |
| 2713 | IPI:IPI00379625.2 | Nova2 Uncharacterized protein                                                    | 2.52 | 4.46  | 2  |
| 2714 | IPI:IPI00130733.3 | Dhodh Dihydroorotate dehydrogenase, mitochondrial                                | 2.51 | 3.544 | 1  |
| 2715 | IPI:IPI00830283.1 | Abhd6 Isoform 2 of Monoacylglycerol lipase ABHD6                                 | 2.51 | 10.38 | 2  |
| 2716 | IPI:IPI00108098.1 | Cd82 CD82 antigen                                                                | 2.5  | 8.647 | 2  |
| 2717 | IPI:IPI00876048.1 | Ppp1r12a Isoform 2 of Protein phosphatase 1 regulatory subunit 12A               | 2.5  | 3.187 | 3  |

|      |                   |                                                                                       |      |       |    |
|------|-------------------|---------------------------------------------------------------------------------------|------|-------|----|
| 2718 | IPI:IPI00135207.3 | Ccar1 Isoform 1 of Cell division cycle and apoptosis regulator protein 1              | 2.5  | 3.054 | 3  |
| 2719 | IPI:IPI00856307.2 | 3110003A17Rik UPF0727 protein C6orf115 homolog                                        | 2.5  | 19.75 | 1  |
| 2720 | IPI:IPI00137460.3 | Armc10 Isoform 2 of Armadillo repeat-containing protein 10                            | 2.49 | 9.044 | 2  |
| 2721 | IPI:IPI00222307.1 | Nup93 Isoform 1 of Nuclear pore complex protein Nup93                                 | 2.49 | 3.175 | 1  |
| 2722 | IPI:IPI00119880.1 | Nudt3 Diphosphoinositol polyphosphate phosphohydrolase 1                              | 2.49 | 11.9  | 1  |
| 2723 | IPI:IPI00381495.5 | Ccdc6 Uncharacterized protein                                                         | 2.49 | 7.036 | 2  |
| 2724 | IPI:IPI00622184.3 | Cog2 82 kDa protein                                                                   | 2.48 | 2.195 | 1  |
| 2725 | IPI:IPI00130277.1 | Ik Protein Red                                                                        | 2.48 | 7.899 | 2  |
| 2726 | IPI:IPI00320503.2 | Slc25a42 Solute carrier family 25 member 42                                           | 2.48 | 6.918 | 1  |
| 2727 | IPI:IPI00553784.1 | Pcnp PEST proteolytic signal-containing nuclear protein                               | 2.48 | 6.18  | 1  |
| 2728 | IPI:IPI00124064.3 | Zdhhc5 Isoform 1 of Probable palmitoyltransferase ZDHHC5                              | 2.48 | 3.636 | 2  |
| 2729 | IPI:IPI00776335.1 | Dmd Dystrophin, muscular dystrophy                                                    | 2.47 | 4.305 | 2  |
| 2730 | IPI:IPI00754723.2 | Wdfy1 WD repeat and FYVE domain containing 1 isoform 1                                | 2.47 | 3.902 | 1  |
| 2731 | IPI:IPI00621973.3 | Ylpm1 Uncharacterized protein                                                         | 2.47 | 2.009 | 3  |
| 2732 | IPI:IPI00263013.4 | Plp1 Isoform 1 of Myelin proteolipid protein                                          | 2.46 | 4.693 | 1  |
| 2733 | IPI:IPI00885273.1 | Ncoa5 Nuclear receptor coactivator 5                                                  | 2.46 | 8.027 | 2  |
| 2734 | IPI:IPI00406371.3 | Gfpt1 Isoform 1 of Glucosamine--fructose-6-phosphate aminotransferase [isomerizing] 1 | 2.45 | 3.73  | 2  |
| 2735 | IPI:IPI00654342.2 | Lpgat1 acyl-CoA:lysophosphatidylglycerol acyltransferase 1 isoform 1                  | 2.45 | 3.423 | 1  |
| 2736 | IPI:IPI00153266.1 | Sccpdh Probable saccharopine dehydrogenase                                            | 2.45 | 4.895 | 2  |
| 2737 | IPI:IPI00970320.1 | Uck1 Protein                                                                          | 2.45 | 6.731 | 1  |
| 2738 | IPI:IPI00132901.1 | Lsm7;Gm10146 U6 snRNA-associated Sm-like protein LSm7                                 | 2.45 | 15.53 | 2  |
| 2739 | IPI:IPI00554830.2 | Gulo L-gulonolactone oxidase                                                          | 2.44 | 4.773 | 2  |
| 2740 | IPI:IPI00122293.3 | Prelp Prolargin                                                                       | 2.44 | 3.439 | 1  |
| 2741 | IPI:IPI00228590.2 | Mfap1b;Mfap1a Microfibrillar-associated protein 1                                     | 2.44 | 8.656 | 2  |
| 2742 | IPI:IPI00170051.2 | Hscb Iron-sulfur cluster co-chaperone protein HscB, mitochondrial                     | 2.43 | 9.829 | 2  |
| 2743 | IPI:IPI00117583.3 | Tmsb10;Gm9844 Thymosin beta-10                                                        | 2.43 | 47.73 | 3  |
| 2744 | IPI:IPI00130621.4 | Rasa1 RAS p21 protein activator 1                                                     | 2.43 | 2.119 | 2  |
| 2745 | IPI:IPI00881179.1 | BC100530 Uncharacterized protein                                                      | 2.43 | 35.48 | 2  |
| 2746 | IPI:IPI00830704.1 | Tpm1 33 kDa protein                                                                   | 2.41 | 28.52 | 13 |
| 2747 | IPI:IPI00228044.1 | Camk2g Isoform 2 of Calcium/calmodulin-dependent protein kinase type II subunit gamma | 2.4  | 27.41 | 16 |
| 2748 | IPI:IPI00133339.1 | LOC100048057;Fam103a1 Protein FAM103A1                                                | 2.4  | 12.61 | 1  |

|      |                   |                                                                                     |      |       |     |
|------|-------------------|-------------------------------------------------------------------------------------|------|-------|-----|
| 2749 | IPI:IPI00115787.1 | Tm9sf2 Transmembrane 9 superfamily member 2                                         | 2.4  | 4.532 | 2   |
| 2750 | IPI:IPI00968403.1 | Spna2 spectrin alpha chain, brain isoform 3                                         | 2.4  | 62.84 | 184 |
| 2751 | IPI:IPI00331734.5 | H2afz Histone H2A.Z                                                                 | 2.39 | 35.16 | 5   |
| 2752 | IPI:IPI00134506.1 | Dguok Isoform 1 of Deoxyguanosine kinase, mitochondrial                             | 2.38 | 16.61 | 2   |
| 2753 | IPI:IPI00135208.1 | Ccdc56 Coiled-coil domain-containing protein 56                                     | 2.38 | 20.37 | 2   |
| 2754 | IPI:IPI00473215.6 | Pitpnc1 Isoform 1 of Cytoplasmic phosphatidylinositol transfer protein 1            | 2.37 | 8.735 | 2   |
| 2755 | IPI:IPI00350590.6 | Txnrd2 Uncharacterized protein                                                      | 2.37 | 4.618 | 1   |
| 2756 | IPI:IPI00130018.1 | Lypla1 Isoform 1 of Acyl-protein thioesterase 1                                     | 2.37 | 16.09 | 2   |
| 2757 | IPI:IPI00894946.1 | Lpo Lactoperoxidase                                                                 | 2.36 | 1.69  | 1   |
| 2758 | IPI:IPI00399812.3 | Rogdi Isoform 1 of Protein rogdi homolog                                            | 2.36 | 11.5  | 2   |
| 2759 | IPI:IPI00135390.2 | Coro7 Coronin-7                                                                     | 2.36 | 5.531 | 2   |
| 2760 | IPI:IPI00830990.2 | Pak3 PAK3cb protein                                                                 | 2.36 | 13.28 | 6   |
| 2761 | IPI:IPI00316469.4 | Stt3b Dolichyl-diphosphooligosaccharide--protein glycosyltransferase subunit STT3B  | 2.36 | 1.701 | 1   |
| 2762 | IPI:IPI00929832.1 | Nup205 nucleoporin 205                                                              | 2.36 | 1.394 | 2   |
| 2763 | IPI:IPI00119784.1 | Ide Insulin-degrading enzyme                                                        | 2.35 | 8.93  | 8   |
| 2764 | IPI:IPI00130144.2 | Ephx1 Microsomal epoxide hydrolase                                                  | 2.35 | 1.758 | 1   |
| 2765 | IPI:IPI00850336.2 | Polr2l DNA-directed RNA polymerases I, II, and III subunit RPABC5                   | 2.35 | 16.42 | 1   |
| 2766 | IPI:IPI00918881.1 | Man2c1 Man2c1 protein                                                               | 2.35 | 1.17  | 1   |
| 2767 | IPI:IPI00876029.1 | Arf4 20 kDa protein                                                                 | 2.35 | 39.23 | 6   |
| 2768 | IPI:IPI00669522.4 | Clasp1 Isoform 2 of CLIP-associating protein 1                                      | 2.35 | 2.949 | 3   |
| 2769 | IPI:IPI00885921.2 | - Clk2-Scamp3 protein                                                               | 2.35 | 2.089 | 1   |
| 2770 | IPI:IPI00918201.1 | Ptgr2 Putative uncharacterized protein                                              | 2.35 | 7.937 | 3   |
| 2771 | IPI:IPI00153728.1 | Ddx19b Putative uncharacterized protein                                             | 2.35 | 6.889 | 2   |
| 2772 | IPI:IPI00263638.8 | Ncald Neurocalcin-delta                                                             | 2.34 | 29.02 | 6   |
| 2773 | IPI:IPI00116825.1 | Abcf2 ATP-binding cassette sub-family F member 2                                    | 2.34 | 3.185 | 2   |
| 2774 | IPI:IPI00475058.2 | Brp44l Putative uncharacterized protein                                             | 2.34 | 6.587 | 1   |
| 2775 | IPI:IPI00471256.2 | Prkra Interferon-inducible double stranded RNA-dependent protein kinase activator A | 2.33 | 6.07  | 1   |
| 2776 | IPI:IPI00460715.2 | Nrxn3 Uncharacterized protein                                                       | 2.33 | 1.303 | 1   |
| 2777 | IPI:IPI00606769.1 | Trp53rk Nori-2 protein                                                              | 2.33 | 10.66 | 1   |
| 2778 | IPI:IPI00876056.1 | Taf15 62 kDa protein                                                                | 2.33 | 4.924 | 5   |
| 2779 | IPI:IPI00752884.1 | LOC100047616 similar to adenylate kinase 4                                          | 2.33 | 3.374 | 1   |
| 2780 | IPI:IPI00131143.1 | Sel1l Isoform 1 of Protein sel-1 homolog 1                                          | 2.32 | 5.696 | 3   |
| 2781 | IPI:IPI00874743.1 | Trmt6 59 kDa protein                                                                | 2.31 | 5.133 | 2   |
| 2782 | IPI:IPI00222237.3 | Ccdc126 Isoform 1 of Coiled-coil domain-containing protein 126                      | 2.31 | 21.43 | 3   |
| 2783 | IPI:IPI00515177.1 | Crlf3 41 kDa protein                                                                | 2.31 | 3.867 | 1   |
| 2784 | IPI:IPI00122273.1 | Dag1 Dystroglycan                                                                   | 2.31 | 1.68  | 1   |
| 2785 | IPI:IPI00929853.1 | Rnpep aminopeptidase B isoform 1                                                    | 2.3  | 3.846 | 3   |

|      |                   |                                                                                            |      |       |    |
|------|-------------------|--------------------------------------------------------------------------------------------|------|-------|----|
| 2786 | IPI:IPI00110623.1 | Cryba1 Beta-crystallin A1                                                                  | 2.3  | 66.16 | 67 |
| 2787 | IPI:IPI00119622.1 | Csad Cysteine sulfinic acid decarboxylase                                                  | 2.29 | 3.448 | 1  |
| 2788 | IPI:IPI00830701.1 | Tpm1 37 kDa protein                                                                        | 2.29 | 34.97 | 15 |
| 2789 | IPI:IPI00114241.2 | Nefh Neurofilament heavy polypeptide                                                       | 2.29 | 3.945 | 6  |
| 2790 | IPI:IPI00112053.1 | Snx5 Sorting nexin-5                                                                       | 2.29 | 7.673 | 2  |
| 2791 | IPI:IPI00313824.2 | Gosr2 Golgi SNAP receptor complex member 2                                                 | 2.27 | 9.906 | 2  |
| 2792 | IPI:IPI00919281.1 | 1810035L17Rik 11 kDa protein                                                               | 2.27 | 27.45 | 2  |
| 2793 | IPI:IPI00265467.3 | Rgs6 Regulator of G-protein signaling 6                                                    | 2.27 | 9.534 | 2  |
| 2794 | IPI:IPI00136782.1 | Polr3c Isoform 1 of DNA-directed RNA polymerase III subunit RPC3                           | 2.27 | 2.251 | 2  |
| 2795 | IPI:IPI00225062.2 | Srrm2 Isoform 3 of Serine/arginine repetitive matrix protein 2                             | 2.26 | 1.882 | 3  |
| 2796 | IPI:IPI00625723.2 | Zc3h4 Isoform 2 of Zinc finger CCCH domain-containing protein 4                            | 2.26 | 1.31  | 1  |
| 2797 | IPI:IPI00894963.1 | Dgke Diacylglycerol kinase epsilon                                                         | 2.26 | 2.305 | 2  |
| 2798 | IPI:IPI00655029.1 | Sorbs1 sorbin and SH3 domain-containing protein 1 isoform 2                                | 2.26 | 1.706 | 1  |
| 2799 | IPI:IPI00223738.2 | Oxsr1 Serine/threonine-protein kinase OSR1                                                 | 2.26 | 3.605 | 1  |
| 2800 | IPI:IPI00416918.3 | Ccdc93 Coiled-coil domain-containing protein 93                                            | 2.26 | 2.862 | 1  |
| 2801 | IPI:IPI00113528.1 | Tm9sf3 Transmembrane 9 superfamily member 3                                                | 2.25 | 4.429 | 1  |
| 2802 | IPI:IPI00831587.1 | Sec24a SEC24 related gene family, member A                                                 | 2.24 | 1.861 | 1  |
| 2803 | IPI:IPI00654396.1 | Kcnp3 calsenilin isoform b                                                                 | 2.24 | 6.957 | 2  |
| 2804 | IPI:IPI00331260.1 | Fam192a Protein FAM192A                                                                    | 2.24 | 8.268 | 2  |
| 2805 | IPI:IPI00226466.6 | Dnajc11 DnaJ homolog subfamily C member 11                                                 | 2.24 | 3.22  | 1  |
| 2806 | IPI:IPI00124286.2 | Ap3m2 AP-3 complex subunit mu-2                                                            | 2.24 | 5.024 | 1  |
| 2807 | IPI:IPI00170357.5 | Afg3l2 AFG3-like protein 2                                                                 | 2.24 | 5.86  | 2  |
| 2808 | IPI:IPI00420710.1 | Galnt2 Isoform 1 of Polypeptide N-acetylgalactosaminyltransferase 2                        | 2.24 | 1.754 | 1  |
| 2809 | IPI:IPI00831483.2 | Rps15 Uncharacterized protein                                                              | 2.24 | 25.42 | 2  |
| 2810 | IPI:IPI00816940.1 | Lrba Isoform 3 of Lipopolysaccharide-responsive and beige-like anchor protein              | 2.23 | 1.512 | 3  |
| 2811 | IPI:IPI00848775.1 | Gm16470 similar to Glyceraldehyde-3-phosphate dehydrogenase                                | 2.23 | 50.94 | 89 |
| 2812 | IPI:IPI00110027.1 | Gm6776 similar to leucine zipper transcription factor-like 1                               | 2.23 | 5.017 | 1  |
| 2813 | IPI:IPI00316133.7 | Srp72 signal recognition particle 72                                                       | 2.22 | 2.832 | 2  |
| 2814 | IPI:IPI00885621.1 | Plrg1 Uncharacterized protein                                                              | 2.22 | 4.762 | 2  |
| 2815 | IPI:IPI00867895.1 | Acap2 Isoform 1 of Arf-GAP with coiled-coil, ANK repeat and PH domain-containing protein 2 | 2.22 | 1.299 | 1  |
| 2816 | IPI:IPI00653300.1 | Tm9sf2 Putative uncharacterized protein                                                    | 2.22 | 4.478 | 2  |
| 2817 | IPI:IPI00132148.1 | Uqcr11 Cytochrome b-c1 complex subunit 10                                                  | 2.21 | 21.43 | 2  |
| 2818 | IPI:IPI00761646.3 | Abcb7 ATP-binding cassette sub-family B member 7, mitochondrial                            | 2.21 | 1.33  | 1  |
| 2819 | IPI:IPI00127492.1 | Smap1 Stromal membrane-associated protein 1                                                | 2.21 | 2.955 | 2  |

|      |                   |                                                                                      |      |        |   |
|------|-------------------|--------------------------------------------------------------------------------------|------|--------|---|
| 2820 | IPI:IPI00323600.4 | Coro1a Coronin-1A                                                                    | 2.21 | 4.555  | 2 |
| 2821 | IPI:IPI00466728.3 | Frmd5 Isoform 1 of FERM domain-containing protein 5                                  | 2.21 | 2.321  | 2 |
| 2822 | IPI:IPI00133126.1 | Zwint ZW10 interactor                                                                | 2.21 | 9.524  | 1 |
| 2823 | IPI:IPI00221767.1 | Nup107 Nuclear pore complex protein Nup107                                           | 2.2  | 2.052  | 2 |
| 2824 | IPI:IPI00124281.4 | Myo1b myosin-Ib isoform 2                                                            | 2.2  | 1.897  | 1 |
| 2825 | IPI:IPI00108085.1 | Tial1 Nucleolysin TIAR                                                               | 2.2  | 10.46  | 2 |
| 2826 | IPI:IPI00221567.3 | Sipa1l3 signal-induced proliferation-associated 1 like 3                             | 2.2  | 0.5068 | 1 |
| 2827 | IPI:IPI00277554.4 | Mocs3 Adenylyltransferase and sulfurtransferase MOCS3                                | 2.2  | 3.043  | 1 |
| 2828 | IPI:IPI00133744.1 | Ndufaf4 NADH dehydrogenase [ubiquinone] 1 alpha subcomplex assembly factor 4         | 2.19 | 8.092  | 1 |
| 2829 | IPI:IPI00310578.3 | Eny2 Enhancer of yellow 2 transcription factor homolog                               | 2.19 | 16.83  | 1 |
| 2830 | IPI:IPI00869371.1 | Cnbp cellular nucleic acid-binding protein isoform 2                                 | 2.19 | 8.772  | 1 |
| 2831 | IPI:IPI00464166.2 | Ptpn23 Isoform 1 of Tyrosine-protein phosphatase non-receptor type 23                | 2.19 | 0.9456 | 1 |
| 2832 | IPI:IPI00955696.1 | Gabbr2 Isoform 1 of Gamma-aminobutyric acid receptor subunit beta-2                  | 2.18 | 3.32   | 1 |
| 2833 | IPI:IPI00116372.1 | Mlf2 Myeloid leukemia factor 2                                                       | 2.18 | 7.287  | 1 |
| 2834 | IPI:IPI00749872.1 | Slc1a2 Solute carrier family 1 (Glial high affinity glutamate transporter), member 2 | 2.18 | 4.508  | 1 |
| 2835 | IPI:IPI00228113.5 | Mthfd1l 111 kDa protein                                                              | 2.18 | 3.418  | 3 |
| 2836 | IPI:IPI00655083.1 | Klc1 Kinesin light chain 1G                                                          | 2.17 | 9.302  | 3 |
| 2837 | IPI:IPI00320836.1 | Nbea Isoform 4 of Neurobeachin                                                       | 2.17 | 0.7847 | 2 |
| 2838 | IPI:IPI00133418.1 | Scg2 Secretogranin-2                                                                 | 2.17 | 2.755  | 2 |
| 2839 | IPI:IPI00848943.1 | Myof similar to Myoferlin (Fer-1-like protein 3) isoform 1                           | 2.17 | 1.025  | 3 |
| 2840 | IPI:IPI00849688.1 | LOC100045228 similar to neuroligin 3                                                 | 2.17 | 4.436  | 3 |
| 2841 | IPI:IPI00915502.1 | Ptprs Isoform 4 of Receptor-type tyrosine-protein phosphatase S                      | 2.17 | 1.269  | 2 |
| 2842 | IPI:IPI00653846.2 | Ano2 Uncharacterized protein                                                         | 2.17 | 2.724  | 1 |
| 2843 | IPI:IPI00330864.1 | Ate1 Arginyl-tRNA--protein transferase 1                                             | 2.17 | 3.34   | 1 |
| 2844 | IPI:IPI00135842.1 | Gm12571 similar to Lsm6 protein                                                      | 2.17 | 12.5   | 1 |
| 2845 | IPI:IPI00129362.1 | Fads2 Fatty acid desaturase 2                                                        | 2.17 | 3.604  | 2 |
| 2846 | IPI:IPI00465884.7 | Nploc4 Isoform 1 of Nuclear protein localization protein 4 homolog                   | 2.16 | 5.263  | 2 |
| 2847 | IPI:IPI00653706.1 | Fam126b Isoform 2 of Protein FAM126B                                                 | 2.16 | 1.877  | 1 |
| 2848 | IPI:IPI00130046.1 | Plcd1 Putative uncharacterized protein                                               | 2.16 | 3.439  | 1 |
| 2849 | IPI:IPI00221791.5 | Sirpa Isoform 2 of Tyrosine-protein phosphatase non-receptor type substrate 1        | 2.16 | 2.358  | 1 |
| 2850 | IPI:IPI00462746.5 | Spag9 Isoform 2 of C-Jun-amino-terminal kinase-                                      | 2.16 | 1.224  | 1 |

|      |                   |                                                                                     |      |        |   |
|------|-------------------|-------------------------------------------------------------------------------------|------|--------|---|
|      |                   | interacting protein 4                                                               |      |        |   |
| 2851 | IPI:IPI00115708.1 | Pip4k2a Phosphatidylinositol-5-phosphate 4-kinase type-2 alpha                      | 2.16 | 2.222  | 1 |
| 2852 | IPI:IPI00330840.1 | Golga1 Isoform 1 of Golgin subfamily A member 1                                     | 2.15 | 1.979  | 1 |
| 2853 | IPI:IPI00125776.1 | Timm8a1;Gm9797 Mitochondrial import inner membrane translocase subunit Tim8 A       | 2.15 | 45.36  | 2 |
| 2854 | IPI:IPI00121579.1 | Lsm1 U6 snRNA-associated Sm-like protein LSm1                                       | 2.15 | 15.79  | 2 |
| 2855 | IPI:IPI00886141.1 | Stxbp2 Stxbp2 protein                                                               | 2.15 | 4.377  | 2 |
| 2856 | IPI:IPI00515365.4 | Abr Isoform 4 of Active breakpoint cluster region-related protein                   | 2.15 | 1.205  | 1 |
| 2857 | IPI:IPI00120923.2 | Vps16 Isoform 1 of Vacuolar protein sorting-associated protein 16 homolog           | 2.15 | 2.741  | 2 |
| 2858 | IPI:IPI00752131.1 | LOC627816 similar to protein phosphatase 1cgamma isoform 9                          | 2.15 | 6.154  | 2 |
| 2859 | IPI:IPI00929857.2 | Golgb1 golgi autoantigen, golgin subfamily b, macrogolgin 1                         | 2.15 | 0.563  | 1 |
| 2860 | IPI:IPI00266942.6 | Esyt2 Isoform 1 of Extended synaptotagmin-2                                         | 2.15 | 1.538  | 1 |
| 2861 | IPI:IPI00762083.2 | Dpp6 dipeptidyl aminopeptidase-like protein 6 isoform 1                             | 2.14 | 3.487  | 3 |
| 2862 | IPI:IPI00109401.1 | Rpap3 RNA polymerase II-associated protein 3                                        | 2.14 | 3.788  | 2 |
| 2863 | IPI:IPI00124900.1 | Auh Isoform 1 of Methylglutaconyl-CoA hydratase, mitochondrial                      | 2.14 | 6.369  | 2 |
| 2864 | IPI:IPI00458002.1 | Atxn2l Isoform 3 of Ataxin-2-like protein                                           | 2.14 | 0.9588 | 1 |
| 2865 | IPI:IPI00128570.5 | Thtpa Thiamine-triphosphatase                                                       | 2.14 | 4.911  | 1 |
| 2866 | IPI:IPI00875654.1 | Rbm10 103 kDa protein                                                               | 2.14 | 1.613  | 1 |
| 2867 | IPI:IPI00918397.1 | Arfp1 41 kDa protein                                                                | 2.13 | 9.29   | 2 |
| 2868 | IPI:IPI00660262.4 | Gpx4 phospholipid hydroperoxide glutathione peroxidase, nuclear isoform 1 precursor | 2.13 | 7.115  | 2 |
| 2869 | IPI:IPI00127204.1 | Cox4i2 Cytochrome c oxidase subunit 4 isoform 2, mitochondrial                      | 2.13 | 8.721  | 1 |
| 2870 | IPI:IPI00121276.4 | Mecr Trans-2-enoyl-CoA reductase, mitochondrial                                     | 2.13 | 5.63   | 2 |
| 2871 | IPI:IPI00467004.5 | Stat1 Putative uncharacterized protein                                              | 2.13 | 3.709  | 2 |
| 2872 | IPI:IPI00122312.2 | Fgg Putative uncharacterized protein                                                | 2.13 | 4.74   | 2 |
| 2873 | IPI:IPI00848381.1 | Grsf1 G-rich sequence factor 1 isoform 2                                            | 2.13 | 6.077  | 1 |
| 2874 | IPI:IPI00754961.1 | Adam22 Isoform 14 of Disintegrin and metalloproteinase domain-containing protein 22 | 2.13 | 2.605  | 1 |
| 2875 | IPI:IPI00719866.1 | H3f3b;H3f3a hypothetical protein isoform 1                                          | 2.13 | 6.618  | 1 |
| 2876 | IPI:IPI00226687.4 | Ndufaf1 complex I intermediate-associated protein 30, mitochondrial                 | 2.13 | 3.333  | 1 |
| 2877 | IPI:IPI00133001.1 | 4930524B15Rik Uncharacterized protein C5orf47 homolog                               | 2.13 | 7.879  | 1 |
| 2878 | IPI:IPI00124225.3 | Psme2 Proteasome activator complex subunit 2                                        | 2.12 | 9.623  | 1 |
| 2879 | IPI:IPI00849210.1 | Gm5561 similar to ribosomal protein                                                 | 2.12 | 5      | 1 |
| 2880 | IPI:IPI00120187.3 | Fmod Fibromodulin                                                                   | 2.12 | 2.926  | 1 |



|      |                   |                                                                                                           |      |        |     |
|------|-------------------|-----------------------------------------------------------------------------------------------------------|------|--------|-----|
| 2881 | IPI:IPI00625954.4 | Nt5dc2 5'-nucleotidase domain containing 2                                                                | 2.12 | 2.821  | 1   |
| 2882 | IPI:IPI00330619.3 | Vac14 Protein VAC14 homolog                                                                               | 2.12 | 5.627  | 2   |
| 2883 | IPI:IPI00129968.2 | Emb Embigin                                                                                               | 2.12 | 2.727  | 1   |
| 2884 | IPI:IPI00128567.2 | Ache Acetylcholinesterase                                                                                 | 2.12 | 5.049  | 1   |
| 2885 | IPI:IPI00756325.1 | Esyt1 Isoform 2 of Extended synaptotagmin-1                                                               | 2.11 | 2.352  | 2   |
| 2886 | IPI:IPI00849284.3 | Gcfc1 GC-rich sequence DNA-binding factor homolog                                                         | 2.11 | 2.176  | 2   |
| 2887 | IPI:IPI00626782.2 | Arfgef1 ADP-ribosylation factor guanine nucleotide-exchange factor 1                                      | 2.11 | 1.842  | 3   |
| 2888 | IPI:IPI00761932.3 | B3galt1 Isoform 1 of Beta-1,3-glucosyltransferase                                                         | 2.11 | 4.499  | 2   |
| 2889 | IPI:IPI00228580.2 | Fam123a Isoform 1 of Protein FAM123A                                                                      | 2.11 | 2.232  | 1   |
| 2890 | IPI:IPI00115215.1 | Tpmt Thiopurine S-methyltransferase                                                                       | 2.11 | 4.167  | 1   |
| 2891 | IPI:IPI00922981.1 | Rad23a Rad23a protein                                                                                     | 2.11 | 8.287  | 2   |
| 2892 | IPI:IPI00876559.1 | Khsrp KH type splicing regulatory protein KSRP                                                            | 2.11 | 45.75  | 36  |
| 2893 | IPI:IPI00928374.1 | Ncstn nicastrin precursor                                                                                 | 2.11 | 2.401  | 2   |
| 2894 | IPI:IPI00114252.1 | Ptgds Prostaglandin-H2 D-isomerase                                                                        | 2.11 | 16.4   | 2   |
| 2895 | IPI:IPI00330576.2 | Rilp Rab-interacting lysosomal protein                                                                    | 2.11 | 5.691  | 2   |
| 2896 | IPI:IPI00762232.1 | Rpl9-ps7 Uncharacterized protein                                                                          | 2.11 | 8.333  | 2   |
| 2897 | IPI:IPI00776156.1 | Smarca1 SWI/SNF related, matrix associated, actin dependent regulator of chromatin, subfamily a, member 1 | 2.11 | 1.742  | 2   |
| 2898 | IPI:IPI00380766.5 | Rnf20 Isoform 1 of E3 ubiquitin-protein ligase BRE1A                                                      | 2.11 | 1.131  | 1   |
| 2899 | IPI:IPI00762596.3 | Inf2 Isoform 2 of Inverted formin-2                                                                       | 2.11 | 2.057  | 3   |
| 2900 | IPI:IPI00229856.1 | Dcaf8 Isoform 1 of DDB1- and CUL4-associated factor 8                                                     | 2.11 | 2.707  | 1   |
| 2901 | IPI:IPI00177205.1 | Rheb GTP-binding protein Rheb                                                                             | 2.11 | 8.696  | 1   |
| 2902 | IPI:IPI00380817.6 | Bcr Breakpoint cluster region protein                                                                     | 2.11 | 0.7874 | 1   |
| 2903 | IPI:IPI00751474.1 | Atp2b4 plasma membrane calcium ATPase 4 isoform x/e                                                       | 2.11 | 8.299  | 11  |
| 2904 | IPI:IPI00319221.3 | Ccdc12 Coiled-coil domain-containing protein 12                                                           | 2.1  | 19.28  | 3   |
| 2905 | IPI:IPI00468068.3 | Hspb1 Isoform B of Heat shock protein beta-1                                                              | 2.1  | 16.75  | 2   |
| 2906 | IPI:IPI00404438.1 | Picalm Isoform 6 of Phosphatidylinositol-binding clathrin assembly protein                                | 2.1  | 7.822  | 6   |
| 2907 | IPI:IPI00133108.1 | Klk5 Putative uncharacterized protein                                                                     | 2.1  | 15.02  | 7   |
| 2908 | IPI:IPI00351246.3 | Mpp3 MAGUK p55 subfamily member 3                                                                         | 2.1  | 2.051  | 1   |
| 2909 | IPI:IPI00317289.8 | Dctn4 Isoform 2 of Dynactin subunit 4                                                                     | 2.1  | 4.783  | 2   |
| 2910 | IPI:IPI00663957.1 | - similar to Glyceraldehyde-3-phosphate dehydrogenase (GAPDH) isoform 1                                   | 2.1  | 70.27  | 194 |
| 2911 | IPI:IPI00928481.1 | Impdh1 Protein                                                                                            | 2.1  | 55.61  | 7   |
| 2912 | IPI:IPI00128741.1 | Cetn2 Centrin-2                                                                                           | 2.1  | 11.05  | 2   |
| 2913 | IPI:IPI00117888.1 | Fadd Protein FADD                                                                                         | 2.1  | 8.293  | 2   |
| 2914 | IPI:IPI00119714.2 | Ubtf Upstream binding transcription factor, RNA polymerase I, isoform CRA_b                               | 2.1  | 1.862  | 1   |

|      |                   |                                                                                           |      |        |   |
|------|-------------------|-------------------------------------------------------------------------------------------|------|--------|---|
| 2915 | IPI:IPI00311165.2 | Heph hephaestin isoform 2                                                                 | 2.1  | 3.07   | 2 |
| 2916 | IPI:IPI00944193.1 | Lrriq1 IQ domain-containing protein LRRIQ1 isoform 1                                      | 2.1  | 0.6575 | 1 |
| 2917 | IPI:IPI00461629.1 | Fxn Fxn protein                                                                           | 2.1  | 16.83  | 1 |
| 2918 | IPI:IPI00274140.4 | Arhgap32 Isoform 2 of Rho GTPase-activating protein 32                                    | 2.1  | 0.6322 | 1 |
| 2919 | IPI:IPI00225288.3 | Ccdc90b Isoform 1 of Coiled-coil domain-containing protein 90B, mitochondrial             | 2.1  | 7.031  | 1 |
| 2920 | IPI:IPI00971293.1 | Exoc3l2 hypothetical protein LOC74463                                                     | 2.1  | 1.521  | 2 |
| 2921 | IPI:IPI00653330.1 | Alg1 Isoform 1 of Chitobiosyldiphosphodolichol beta-mannosyltransferase                   | 2.1  | 2.697  | 1 |
| 2922 | IPI:IPI00279642.2 | Lrrc68 Leucine-rich repeat-containing protein 68                                          | 2.1  | 1.966  | 1 |
| 2923 | IPI:IPI00480250.2 | Epb4.1l1 Erythrocyte protein band 4.1-like 1, isoform CRA_a                               | 2.1  | 6.113  | 4 |
| 2924 | IPI:IPI00173233.2 | Ank3 ankyrin 3, epithelial isoform f                                                      | 2.1  | 1.554  | 1 |
| 2925 | IPI:IPI00227757.2 | Gramd1b Isoform 4 of GRAM domain-containing protein 1B                                    | 2.1  | 2.506  | 1 |
| 2926 | IPI:IPI00831534.1 | Ephx1 51 kDa protein                                                                      | 2.1  | 1.814  | 1 |
| 2927 | IPI:IPI00331442.1 | Msra Peptide methionine sulfoxide reductase                                               | 2.1  | 11.16  | 2 |
| 2928 | IPI:IPI00885539.1 | Actl6b 42 kDa protein                                                                     | 2.1  | 3.412  | 1 |
| 2929 | IPI:IPI00938510.1 | Csde1 cold shock domain-containing protein E1 isoform 2                                   | 2.09 | 3.651  | 4 |
| 2930 | IPI:IPI00760074.1 | Mylk Isoform 2 of Myosin light chain kinase, smooth muscle                                | 2.09 | 1.892  | 1 |
| 2931 | IPI:IPI00230005.3 | Prkaca Isoform 1 of cAMP-dependent protein kinase catalytic subunit alpha                 | 2.09 | 30.77  | 9 |
| 2932 | IPI:IPI00667471.1 | Ppp2r2a Serine/threonine-protein phosphatase 2A 55 kDa regulatory subunit B alpha isoform | 2.09 | 3.132  | 1 |
| 2933 | IPI:IPI00761270.1 | Clip1 Isoform 2 of CAP-Gly domain-containing linker protein 1                             | 2.09 | 4.791  | 4 |
| 2934 | IPI:IPI00749627.1 | LOC100048122 similar to Nudt4 protein                                                     | 2.09 | 21.11  | 2 |
| 2935 | IPI:IPI00848537.1 | LOC100045253 similar to Scoc protein                                                      | 2.09 | 9.137  | 1 |
| 2936 | IPI:IPI00229324.1 | Nmt2 Glycylpeptide N-tetradecanoyltransferase                                             | 2.09 | 4.124  | 2 |
| 2937 | IPI:IPI00377609.2 | Vcpip1 Isoform 1 of Deubiquitinating protein VCIP135                                      | 2.09 | 1.311  | 1 |
| 2938 | IPI:IPI00648861.5 | Asph aspartyl/asparaginyl beta-hydroxylase isoform 8                                      | 2.09 | 7.347  | 1 |
| 2939 | IPI:IPI00380469.3 | 5031414D18Rik hypothetical protein LOC271221                                              | 2.09 | 1.481  | 1 |
| 2940 | IPI:IPI00283876.6 | Lcmt1 leucine carboxyl methyltransferase 1                                                | 2.09 | 12.65  | 2 |
| 2941 | IPI:IPI00399575.3 | Mprip Isoform 2 of Myosin phosphatase Rho-interacting protein                             | 2.09 | 1.639  | 1 |
| 2942 | IPI:IPI00753792.1 | Stat3 Isoform Del-701 of Signal transducer and activator of transcription 3               | 2.09 | 1.951  | 1 |
| 2943 | IPI:IPI00400421.1 | Postn Isoform 3 of Periostin                                                              | 2.09 | 1.728  | 1 |
| 2944 | IPI:IPI00647977.1 | Asph aspartyl/asparaginyl beta-hydroxylase                                                | 2.08 | 4      | 3 |

|      |                   |                                                                                            |      |        |   |
|------|-------------------|--------------------------------------------------------------------------------------------|------|--------|---|
|      |                   | isoform 3                                                                                  |      |        |   |
| 2945 | IPI:IPI00653604.2 | Ccdc102a Coiled-coil domain-containing protein 102A                                        | 2.08 | 2.55   | 1 |
| 2946 | IPI:IPI00120257.1 | Hsbsp1 Hsp70-binding protein 1                                                             | 2.08 | 13.73  | 3 |
| 2947 | IPI:IPI00622497.3 | Cyfp2 Cytoplasmic FMR1 interacting protein 2                                               | 2.08 | 1.756  | 2 |
| 2948 | IPI:IPI00319950.4 | Mvd Diphosphomevalonate decarboxylase                                                      | 2.08 | 3.491  | 1 |
| 2949 | IPI:IPI00828766.1 | Myo18a Isoform 5 of Myosin-XVIIIa                                                          | 2.08 | 1.819  | 4 |
| 2950 | IPI:IPI00453769.2 | Cops7b COP9 signalosome complex subunit 7b                                                 | 2.08 | 6.439  | 1 |
| 2951 | IPI:IPI00224653.5 | Sec11c Signal peptidase complex catalytic subunit SEC11C                                   | 2.08 | 10.42  | 1 |
| 2952 | IPI:IPI00133403.1 | Ndub3 NADH dehydrogenase [ubiquinone] 1 beta subcomplex subunit 3                          | 2.08 | 10.58  | 1 |
| 2953 | IPI:IPI00118718.1 | Pcbp4 Poly(rC)-binding protein 4                                                           | 2.08 | 14.14  | 6 |
| 2954 | IPI:IPI00262198.6 | Mcart1 Mitochondrial carrier triple repeat 1                                               | 2.08 | 9.223  | 1 |
| 2955 | IPI:IPI00116713.2 | Glmn Glomulin                                                                              | 2.08 | 1.678  | 1 |
| 2956 | IPI:IPI00719890.2 | Nfkb1 nuclear factor NF-kappa-B p105 subunit                                               | 2.08 | 0.7209 | 2 |
| 2957 | IPI:IPI00468360.3 | Wdr65 WD repeat-containing protein 65                                                      | 2.08 | 0.4804 | 1 |
| 2958 | IPI:IPI00406721.1 | Trim2 Putative uncharacterized protein                                                     | 2.08 | 7.527  | 2 |
| 2959 | IPI:IPI00658782.4 | Gucy1a2;LOC100044212 guanylate cyclase 1, soluble, alpha 2                                 | 2.08 | 1.918  | 2 |
| 2960 | IPI:IPI00229605.2 | Cds1 Phosphatidate cytidyltransferase 1                                                    | 2.08 | 4.555  | 2 |
| 2961 | IPI:IPI00314829.5 | Nln Neurolysin, mitochondrial                                                              | 2.08 | 3.409  | 2 |
| 2962 | IPI:IPI00894746.1 | Rcn3 Uncharacterized protein                                                               | 2.08 | 11.31  | 2 |
| 2963 | IPI:IPI00923688.1 | Fhdc1 FH2 domain-containing protein 1                                                      | 2.08 | 0.7833 | 1 |
| 2964 | IPI:IPI00223861.3 | Paox Isoform 1 of Peroxisomal N(1)-acetyl-spermine/spermidine oxidase                      | 2.08 | 3.175  | 1 |
| 2965 | IPI:IPI00606879.2 | Sfrp1 secreted frizzled-related protein 1 precursor                                        | 2.08 | 5.096  | 1 |
| 2966 | IPI:IPI00112639.3 | Ric8 Synembryn-A                                                                           | 2.08 | 3.585  | 1 |
| 2967 | IPI:IPI00345822.4 | Gucy2f Retinal guanylyl cyclase 2                                                          | 2.08 | 6.137  | 7 |
| 2968 | IPI:IPI00850617.3 | Gm12612 Putative uncharacterized protein (Fragment)                                        | 2.08 | 7.091  | 3 |
| 2969 | IPI:IPI00469577.2 | Lrrc1 Isoform 1 of Leucine-rich repeat-containing protein 1                                | 2.08 | 2.481  | 1 |
| 2970 | IPI:IPI00337992.1 | Epha4 ephrin type-A receptor 4 precursor                                                   | 2.08 | 2.13   | 1 |
| 2971 | IPI:IPI00133732.2 | Kcna3 Potassium voltage-gated channel subfamily A member 3                                 | 2.08 | 2.841  | 1 |
| 2972 | IPI:IPI00928534.1 | Kifc3 kinesin-like protein KIFC3 isoform b                                                 | 2.08 | 2.314  | 1 |
| 2973 | IPI:IPI00849768.1 | Gm4363 similar to HSPC016                                                                  | 2.07 | 23.44  | 2 |
| 2974 | IPI:IPI00458723.2 | Ccdc124 Coiled-coil domain-containing protein 124                                          | 2.07 | 12.9   | 2 |
| 2975 | IPI:IPI00654090.2 | Gyk Glycerol kinase                                                                        | 2.07 | 2.355  | 1 |
| 2976 | IPI:IPI00785394.1 | Acap2 Isoform 2 of Arf-GAP with coiled-coil, ANK repeat and PH domain-containing protein 2 | 2.07 | 1.33   | 1 |
| 2977 | IPI:IPI00221616.5 | Arf6 ADP-ribosylation factor 6                                                             | 2.07 | 6.286  | 1 |

|      |                   |                                                                                                      |      |        |    |
|------|-------------------|------------------------------------------------------------------------------------------------------|------|--------|----|
| 2978 | IPI:IPI00116228.1 | Ppif Peptidyl-prolyl cis-trans isomerase F, mitochondrial                                            | 2.07 | 17.96  | 7  |
| 2979 | IPI:IPI00313539.4 | Scai Isoform 1 of Protein SCAI                                                                       | 2.07 | 1.98   | 1  |
| 2980 | IPI:IPI00121351.1 | Nxn1;LOC100047468 Nucleoredoxin-like protein 1                                                       | 2.07 | 5.069  | 1  |
| 2981 | IPI:IPI00116760.1 | Rab24 Ras-related protein Rab-24                                                                     | 2.07 | 7.389  | 1  |
| 2982 | IPI:IPI00130322.5 | Ndufa7 NADH dehydrogenase [ubiquinone] 1 alpha subcomplex subunit 7                                  | 2.07 | 20.35  | 2  |
| 2983 | IPI:IPI00344681.2 | Pls1 Plastin-1                                                                                       | 2.07 | 5.238  | 2  |
| 2984 | IPI:IPI00457499.5 | Gcn1l1 GCN1 general control of amino-acid synthesis 1-like 1                                         | 2.07 | 0.936  | 2  |
| 2985 | IPI:IPI00677034.1 | 4930451C15Rik Isoform 3 of Leucine-rich repeat-containing protein LOC400891 homolog                  | 2.07 | 2.581  | 1  |
| 2986 | IPI:IPI00649698.2 | Gpx3 Glutathione peroxidase                                                                          | 2.07 | 8.543  | 1  |
| 2987 | IPI:IPI00330679.2 | Ddrk1 DDRGK domain-containing protein 1                                                              | 2.07 | 5.397  | 1  |
| 2988 | IPI:IPI00880403.1 | Tmem30a Uncharacterized protein                                                                      | 2.07 | 5.183  | 1  |
| 2989 | IPI:IPI00228045.1 | Camk2g Isoform 3 of Calcium/calmodulin-dependent protein kinase type II subunit gamma                | 2.07 | 22.63  | 12 |
| 2990 | IPI:IPI00457543.3 | Ppp2r5c Isoform 4 of Serine/threonine-protein phosphatase 2A 56 kDa regulatory subunit gamma isoform | 2.07 | 5.847  | 2  |
| 2991 | IPI:IPI00403079.4 | Cd47 Isoform 1 of Leukocyte surface antigen CD47                                                     | 2.07 | 6.601  | 3  |
| 2992 | IPI:IPI00970165.1 | Arhgap23 160 kDa protein                                                                             | 2.07 | 0.8197 | 2  |
| 2993 | IPI:IPI00309724.6 | Unc45a Protein unc-45 homolog A                                                                      | 2.07 | 2.119  | 2  |
| 2994 | IPI:IPI00944744.1 | Cog2 Conserved oligomeric Golgi complex subunit 2                                                    | 2.07 | 2.189  | 1  |
| 2995 | IPI:IPI00338717.3 | Csde1 MKIAA0885 protein (Fragment)                                                                   | 2.07 | 2.676  | 3  |
| 2996 | IPI:IPI00875249.1 | Tnnt3 Troponin T fast skeletal muscle isoform (Fragment)                                             | 2.07 | 5.161  | 2  |
| 2997 | IPI:IPI00754249.1 | Dstyk Isoform 3 of Dual serine/threonine and tyrosine protein kinase                                 | 2.07 | 1.525  | 1  |
| 2998 | IPI:IPI00850259.2 | Gm14176 similar to Chain A, Crystal Structure Of Human Rangap1-Ubc9                                  | 2.07 | 6.962  | 2  |
| 2999 | IPI:IPI00750151.1 | Clip2 MKIAA0291 protein (Fragment)                                                                   | 2.06 | 2.719  | 2  |
| 3000 | IPI:IPI00118420.3 | Stra6 Stimulated by retinoic acid gene 6 protein                                                     | 2.06 | 3.284  | 3  |
| 3001 | IPI:IPI00120023.1 | Nebi Putative uncharacterized protein                                                                | 2.06 | 14.44  | 3  |
| 3002 | IPI:IPI00321407.6 | Cul4a Cullin-4A                                                                                      | 2.06 | 1.449  | 2  |
| 3003 | IPI:IPI00319956.1 | Impact Protein IMPACT                                                                                | 2.06 | 7.862  | 1  |
| 3004 | IPI:IPI00331076.4 | Slk Isoform 1 of STE20-like serine/threonine-protein kinase                                          | 2.06 | 1.946  | 2  |
| 3005 | IPI:IPI00410796.3 | Itfg3 Protein ITFG3                                                                                  | 2.06 | 5.225  | 2  |
| 3006 | IPI:IPI00828395.2 | 1810014F10Rik Isoform 1 of Protein fucU homolog                                                      | 2.06 | 25.49  | 2  |
| 3007 | IPI:IPI00882011.1 | Gria4 glutamate receptor 4 isoform 3 precursor                                                       | 2.06 | 3.002  | 1  |
| 3008 | IPI:IPI00474373.1 | Sqstm1 Isoform 2 of Sequestosome-1                                                                   | 2.06 | 4.455  | 1  |
| 3009 | IPI:IPI00136293.1 | 5033414D02Rik Transmembrane protein C9orf46                                                          | 2.06 | 6.803  | 1  |

|      |                   |                                                                         |      |        |    |
|------|-------------------|-------------------------------------------------------------------------|------|--------|----|
|      |                   | homolog                                                                 |      |        |    |
| 3010 | IPI:IPI00222057.1 | Neo1 Isoform 5 of Neogenin                                              | 2.06 | 1.181  | 1  |
| 3011 | IPI:IPI00856171.1 | Bud31 Uncharacterized protein                                           | 2.06 | 20.83  | 2  |
| 3012 | IPI:IPI00133349.1 | Carhsp1 Calcium-regulated heat stable protein 1                         | 2.06 | 10.81  | 1  |
| 3013 | IPI:IPI00135085.4 | Hebp1 Heme-binding protein 1                                            | 2.06 | 8.421  | 1  |
| 3014 | IPI:IPI00118575.1 | Ubqln4 Ubiquilin-4                                                      | 2.06 | 10.74  | 4  |
| 3015 | IPI:IPI00221569.1 | Zadh2 Zinc-binding alcohol dehydrogenase domain-containing protein 2    | 2.06 | 3.183  | 1  |
| 3016 | IPI:IPI00944111.1 | Atp2a3 sarcoplasmic/endoplasmic reticulum calcium ATPase 3 isoform c    | 2.06 | 6.628  | 8  |
| 3017 | IPI:IPI00471268.1 | Kirrel Isoform 2 of Kin of IRRE-like protein 1                          | 2.06 | 2.839  | 1  |
| 3018 | IPI:IPI00129727.1 | Pcdhga1 Protocadherin gamma A1                                          | 2.06 | 1.504  | 1  |
| 3019 | IPI:IPI00674263.3 | Rap1gap Rap1 GTPase-activating protein                                  | 2.06 | 2.467  | 1  |
| 3020 | IPI:IPI00775975.1 | Cdh13 Putative uncharacterized protein                                  | 2.06 | 2.661  | 2  |
| 3021 | IPI:IPI00464014.1 | Gm5771 trypsinogen 12                                                   | 2.06 | 27.76  | 22 |
| 3022 | IPI:IPI00121100.4 | Wwc2 Protein WWC2                                                       | 2.06 | 2.696  | 3  |
| 3023 | IPI:IPI00313968.8 | Setd3 Isoform 1 of SET domain-containing protein 3                      | 2.06 | 3.704  | 3  |
| 3024 | IPI:IPI00121225.1 | Eml3 Echinoderm microtubule-associated protein-like 3                   | 2.06 | 3.233  | 2  |
| 3025 | IPI:IPI00420511.5 | Wdr90 WD repeat-containing protein 90                                   | 2.06 | 0.3171 | 1  |
| 3026 | IPI:IPI00607069.1 | Gm10257 hypothetical protein isoform 1                                  | 2.06 | 11.76  | 2  |
| 3027 | IPI:IPI00471277.1 | Tcerg1 Isoform 1 of Transcription elongation regulator 1                | 2.06 | 2.727  | 2  |
| 3028 | IPI:IPI00128201.1 | Spryd4 SPRY domain-containing protein 4                                 | 2.06 | 11.59  | 1  |
| 3029 | IPI:IPI00775870.1 | Pqbp1 Polyglutamine binding protein 1                                   | 2.06 | 10     | 1  |
| 3030 | IPI:IPI00118158.1 | Msh2 DNA mismatch repair protein Msh2                                   | 2.06 | 1.497  | 1  |
| 3031 | IPI:IPI00857092.1 | Slc4a4 electrogenic sodium bicarbonate cotransporter 1 isoform b        | 2.06 | 1.554  | 1  |
| 3032 | IPI:IPI00648641.1 | Bbs7 Bardet-Biedl syndrome 7                                            | 2.06 | 2.526  | 1  |
| 3033 | IPI:IPI00620040.3 | Ppm1h Isoform 1 of Protein phosphatase 1H                               | 2.06 | 3.509  | 1  |
| 3034 | IPI:IPI00123756.1 | Gdap1l1 Ganglioside-induced differentiation-associated protein 1-like 1 | 2.06 | 3.542  | 1  |
| 3035 | IPI:IPI00776035.1 | Atp2b3 ATPase, Ca <sup>++</sup> transporting, plasma membrane 3         | 2.05 | 8.269  | 9  |
| 3036 | IPI:IPI00453837.2 | Kdm1a Lysine-specific histone demethylase 1A                            | 2.05 | 1.172  | 1  |
| 3037 | IPI:IPI00311375.6 | Sgsm3 small G protein signaling modulator 3                             | 2.05 | 0.7895 | 1  |
| 3038 | IPI:IPI00124051.1 | Mpp5 MAGUK p55 subfamily member 5                                       | 2.05 | 3.704  | 1  |
| 3039 | IPI:IPI00343627.3 | Ccdc61 Coiled-coil domain-containing protein 61                         | 2.05 | 1.174  | 1  |
| 3040 | IPI:IPI00755120.2 | Rrbp1 ribosome-binding protein 1 isoform a                              | 2.05 | 1.639  | 2  |
| 3041 | IPI:IPI00345834.2 | Rragb Ras-related GTP-binding protein B                                 | 2.05 | 2.674  | 1  |
| 3042 | IPI:IPI00410951.2 | Serpina7 thyroxine-binding globulin precursor                           | 2.05 | 2.347  | 1  |
| 3043 | IPI:IPI00459468.2 | Wrnip1 Isoform 1 of ATPase WRNIP1                                       | 2.05 | 2.121  | 1  |

|      |                   |                                                                         |      |        |   |
|------|-------------------|-------------------------------------------------------------------------|------|--------|---|
| 3044 | IPI:IPI00115089.2 | Entpd2 Isoform Long of Ectonucleoside triphosphate diphosphohydrolase 2 | 2.05 | 2.222  | 1 |
| 3045 | IPI:IPI00466200.3 | Fundc2 FUN14 domain-containing protein 2                                | 2.05 | 7.285  | 1 |
| 3046 | IPI:IPI00753284.3 | Naa50 Isoform 2 of N-alpha-acetyltransferase 50, NatE catalytic subunit | 2.05 | 7.143  | 1 |
| 3047 | IPI:IPI00133690.2 | Tsta3 GDP-L-fucose synthase                                             | 2.05 | 3.738  | 1 |
| 3048 | IPI:IPI00313884.1 | Podxl Podocalyxin                                                       | 2.05 | 2.151  | 1 |
| 3049 | IPI:IPI00125681.4 | Pigs GPI transamidase component PIG-S                                   | 2.05 | 3.784  | 1 |
| 3050 | IPI:IPI00416125.3 | Fam120c constitutive coactivator of PPAR-gamma-like protein 2           | 2.05 | 2.016  | 2 |
| 3051 | IPI:IPI00311344.3 | Cald1 89 kDa protein                                                    | 2.05 | 3.771  | 2 |
| 3052 | IPI:IPI00648460.3 | Fkbp15 FK506 binding protein 15                                         | 2.05 | 2.381  | 1 |
| 3053 | IPI:IPI00169546.1 | Gmds GDP-mannose 4,6 dehydratase                                        | 2.05 | 2.151  | 1 |
| 3054 | IPI:IPI00267489.1 | Gulo Putative uncharacterized protein                                   | 2.05 | 4.773  | 2 |
| 3055 | IPI:IPI00845596.1 | Mlt4 Isoform 3 of Afadin                                                | 2.05 | 0.8242 | 1 |
| 3056 | IPI:IPI00650038.2 | Sort1 Isoform 2 of Sortilin                                             | 2.05 | 2.681  | 1 |
| 3057 | IPI:IPI00411116.4 | Ube2d3 Ubiquitin-conjugating enzyme E2 D3                               | 2.05 | 12.24  | 1 |
| 3058 | IPI:IPI00127376.1 | Wdr54 WD repeat-containing protein 54                                   | 2.05 | 4.192  | 1 |
| 3059 | IPI:IPI00129633.1 | Slc16a8 Monocarboxylate transporter 3                                   | 2.05 | 6.911  | 2 |
| 3060 | IPI:IPI00320484.4 | Kifap3 Isoform KAP3A of Kinesin-associated protein 3                    | 2.05 | 3.279  | 2 |
| 3061 | IPI:IPI00124047.1 | Cul1 Cullin-1                                                           | 2.05 | 2.706  | 2 |
| 3062 | IPI:IPI00276222.1 | Fermt2 Fermitin family homolog 2                                        | 2.05 | 2.206  | 1 |
| 3063 | IPI:IPI00226726.1 | Pcyox1l Prenylcysteine oxidase-like                                     | 2.05 | 2.828  | 1 |
| 3064 | IPI:IPI00956996.1 | Myof Uncharacterized protein                                            | 2.05 | 0.7914 | 1 |
| 3065 | IPI:IPI00651846.1 | Smarcc2 SWI/SNF complex subunit SMARCC2 isoform 2                       | 2.05 | 2.832  | 3 |
| 3066 | IPI:IPI00223863.2 | Cog5 Conserved oligomeric Golgi complex subunit 5                       | 2.05 | 1.809  | 1 |
| 3067 | IPI:IPI00122396.1 | Smpd3 Sphingomyelin phosphodiesterase 3                                 | 2.05 | 3.664  | 1 |
| 3068 | IPI:IPI00117829.1 | Cav1 Isoform Alpha of Caveolin-1                                        | 2.05 | 11.8   | 1 |
| 3069 | IPI:IPI00894813.1 | Mfn2 Mitofusin 2                                                        | 2.05 | 2.314  | 1 |
| 3070 | IPI:IPI00124499.2 | Krt79 Keratin, type II cytoskeletal 79                                  | 2.04 | 3.955  | 5 |
| 3071 | IPI:IPI00875877.1 | Cd47 Uncharacterized protein                                            | 2.04 | 6.173  | 3 |
| 3072 | IPI:IPI00113232.3 | Lyar Cell growth-regulating nucleolar protein                           | 2.04 | 5.155  | 2 |
| 3073 | IPI:IPI00662028.1 | Slc4a4 Isoform 2 of Electrogenic sodium bicarbonate cotransporter 1     | 2.04 | 2.512  | 2 |
| 3074 | IPI:IPI00117981.1 | Actl6b Actin-like protein 6B                                            | 2.04 | 3.052  | 1 |
| 3075 | IPI:IPI00117771.1 | Ddx50 ATP-dependent RNA helicase DDX50                                  | 2.04 | 3.678  | 2 |
| 3076 | IPI:IPI00918655.1 | Stxbp5 Uncharacterized protein                                          | 2.04 | 2.093  | 1 |
| 3077 | IPI:IPI00880956.1 | Anapc7 Uncharacterized protein                                          | 2.04 | 1.988  | 1 |
| 3078 | IPI:IPI00116601.1 | Mab21l1 Protein mab-21-like 1                                           | 2.04 | 4.735  | 1 |
| 3079 | IPI:IPI00108147.1 | Rock1 Isoform 1 of Rho-associated protein kinase                        | 2.04 | 1.034  | 1 |

|      |                   |                                                               |      |       |    |
|------|-------------------|---------------------------------------------------------------|------|-------|----|
|      |                   | 1                                                             |      |       |    |
| 3080 | IPI:IPI00656165.1 | Ufd1l Ubiquitin fusion degradation protein 1 homolog          | 2.04 | 3.257 | 1  |
| 3081 | IPI:IPI00416541.1 | Gatc GatC-like protein                                        | 2.04 | 16.77 | 1  |
| 3082 | IPI:IPI00416303.1 | Npepl1 Probable aminopeptidase NPEPL1                         | 2.04 | 2.863 | 2  |
| 3083 | IPI:IPI00130475.1 | Ttc1 Tetratricopeptide repeat protein 1                       | 2.04 | 7.534 | 2  |
| 3084 | IPI:IPI00133119.1 | Rer1 Protein RER1                                             | 2.04 | 4.082 | 1  |
| 3085 | IPI:IPI00848612.1 | LOC100044882 similar to oxysterol binding protein 2 isoform 2 | 2.04 | 5.721 | 4  |
| 3086 | IPI:IPI00606097.1 | Tmprss13 transmembrane protease, serine 13                    | 2.04 | 1.46  | 7  |
| 3087 | IPI:IPI00226563.4 | Ttyh3 Isoform 1 of Protein tweety homolog 3                   | 2.04 | 3.817 | 2  |
| 3088 | IPI:IPI00890076.1 | Maoa amine oxidase [flavin-containing] A                      | 2.04 | 5.133 | 2  |
| 3089 | IPI:IPI00120684.2 | Bax Apoptosis regulator BAX                                   | 2.04 | 9.375 | 2  |
| 3090 | IPI:IPI00322302.1 | Ttc15 Tetratricopeptide repeat protein 15                     | 2.04 | 2.384 | 1  |
| 3091 | IPI:IPI00110956.6 | Chmp6 Charged multivesicular body protein 6                   | 2.04 | 6.5   | 1  |
| 3092 | IPI:IPI00462461.2 | Dpp9 Isoform 1 of Dipeptidyl peptidase 9                      | 2.04 | 2.436 | 1  |
| 3093 | IPI:IPI00895990.1 | Stk38l Serine/threonine kinase 38 like                        | 2.04 | 3.017 | 1  |
| 3094 | IPI:IPI00123487.3 | Gde1 Glycerophosphodiester phosphodiesterase 1                | 2.04 | 5.438 | 2  |
| 3095 | IPI:IPI00409255.2 | D030016E14Rik Isoform 1 of UPF0636 protein C4orf41 homolog    | 2.04 | 2.03  | 3  |
| 3096 | IPI:IPI00623214.2 | Pitpnb Pitpnb protein                                         | 2.04 | 7.353 | 2  |
| 3097 | IPI:IPI00408582.2 | Kif3a Putative uncharacterized protein                        | 2.04 | 3.152 | 3  |
| 3098 | IPI:IPI00153986.2 | Gtf2f1 General transcription factor IIF subunit 1             | 2.04 | 3.15  | 1  |
| 3099 | IPI:IPI00272690.2 | Ace Isoform Somatic of Angiotensin-converting enzyme          | 2.04 | 1.372 | 1  |
| 3100 | IPI:IPI00322869.3 | Abce1 ATP-binding cassette sub-family E member 1              | 2.04 | 2.504 | 1  |
| 3101 | IPI:IPI00128588.1 | Acot11 Acyl-coenzyme A thioesterase 11                        | 2.04 | 1.684 | 1  |
| 3102 | IPI:IPI00753529.1 | LOC100047161 similar to RAS-homolog enriched in brain         | 2.04 | 7.373 | 2  |
| 3103 | IPI:IPI00608093.3 | Tmem201 Putative uncharacterized protein                      | 2.04 | 2.153 | 1  |
| 3104 | IPI:IPI00114594.1 | Rras Ras-related protein R-Ras                                | 2.04 | 12.84 | 2  |
| 3105 | IPI:IPI00753037.3 | Dnm1 Isoform 5 of Dynamin-1                                   | 2.04 | 49.47 | 51 |
| 3106 | IPI:IPI00132424.4 | Xrcc6 X-ray repair cross-complementing protein 6              | 2.04 | 1.645 | 1  |
| 3107 | IPI:IPI00346834.1 | Krt76 Keratin, type II cytoskeletal 2 oral                    | 2.04 | 6.397 | 5  |
| 3108 | IPI:IPI00461290.1 | Osbpl8 oxysterol-binding protein-like protein 8 isoform a     | 2.04 | 2.25  | 2  |
| 3109 | IPI:IPI00317684.8 | 1810074P20Rik Isoform 1 of E3 UFM1-protein ligase 1           | 2.04 | 2.018 | 1  |
| 3110 | IPI:IPI00115701.1 | Usp4 Ubiquitin carboxyl-terminal hydrolase 4                  | 2.04 | 1.247 | 1  |
| 3111 | IPI:IPI00341302.5 | 2310030N02Rik UPF0551 protein C8orf38 homolog, mitochondrial  | 2.04 | 4.505 | 1  |
| 3112 | IPI:IPI00875068.1 | Tecr Gpsn2 protein                                            | 2.04 | 4.696 | 1  |

|      |                   |                                                                              |      |        |   |
|------|-------------------|------------------------------------------------------------------------------|------|--------|---|
| 3113 | IPI:IPI00130885.1 | Rbmxrt Heterogeneous nuclear ribonucleoprotein G                             | 2.04 | 9.536  | 5 |
| 3114 | IPI:IPI00133917.1 | Phc2 Isoform 1 of Polyhomeotic-like protein 2                                | 2.04 | 1.882  | 1 |
| 3115 | IPI:IPI00329962.3 | Fuk L-fucose kinase                                                          | 2.04 | 0.8257 | 1 |
| 3116 | IPI:IPI00662793.4 | Asph 78 kDa protein                                                          | 2.04 | 3.473  | 2 |
| 3117 | IPI:IPI00221798.1 | Rcn3 Reticulocalbin-3                                                        | 2.04 | 4.878  | 1 |
| 3118 | IPI:IPI00463175.1 | Commd1 COMM domain-containing protein 1                                      | 2.04 | 11.17  | 1 |
| 3119 | IPI:IPI00108775.3 | Nub1 NEDD8 ultimate buster 1                                                 | 2.04 | 3.42   | 1 |
| 3120 | IPI:IPI00119808.1 | Clpx ATP-dependent Clp protease ATP-binding subunit clpX-like, mitochondrial | 2.04 | 3.785  | 1 |
| 3121 | IPI:IPI00944164.1 | Nt5c2 cytosolic purine 5'-nucleotidase isoform 1                             | 2.04 | 2.901  | 1 |
| 3122 | IPI:IPI00132685.1 | Bet1 BET1 homolog                                                            | 2.04 | 15.25  | 1 |
| 3123 | IPI:IPI00649105.1 | Ict1 Immature colon carcinoma transcript 1, isoform CRA_c                    | 2.04 | 7.527  | 1 |
| 3124 | IPI:IPI00339747.1 | 6030458C11Rik Isoform 1 of UPF0489 protein C5orf22 homolog                   | 2.03 | 3.167  | 2 |
| 3125 | IPI:IPI00761596.1 | Abr Isoform 3 of Active breakpoint cluster region-related protein            | 2.03 | 2.34   | 2 |
| 3126 | IPI:IPI00968369.1 | Eif2s3y Putative uncharacterized protein                                     | 2.03 | 7.003  | 1 |
| 3127 | IPI:IPI00121834.1 | 2010305A19Rik Hcp beta-lactamase-like protein C1orf163 homolog               | 2.03 | 4.329  | 1 |
| 3128 | IPI:IPI00403618.4 | 6330407J23Rik Uncharacterized protein C6orf174 homolog                       | 2.03 | 1.164  | 1 |
| 3129 | IPI:IPI00622896.2 | Ski Sloan-Kettering viral oncogene homolog                                   | 2.03 | 1.778  | 1 |
| 3130 | IPI:IPI00659713.1 | Cwc27 Peptidyl-prolyl cis-trans isomerase CWC27 homolog                      | 2.03 | 2.559  | 1 |
| 3131 | IPI:IPI00463195.2 | Atg7 Ubiquitin-like modifier-activating enzyme ATG7                          | 2.03 | 3.009  | 1 |
| 3132 | IPI:IPI00652450.2 | Llg2 Lethal(2) giant larvae protein homolog 2                                | 2.03 | 1.266  | 1 |
| 3133 | IPI:IPI00649060.1 | Akap2 Protein                                                                | 2.03 | 1.583  | 1 |
| 3134 | IPI:IPI00816883.1 | LOC100044767 hypothetical protein isoform 1                                  | 2.03 | 1.849  | 1 |
| 3135 | IPI:IPI00136655.1 | Gcat 2-amino-3-ketobutyrate coenzyme A ligase, mitochondrial                 | 2.03 | 4.327  | 1 |
| 3136 | IPI:IPI00751503.3 | Gm7262 similar to MrgB2 G protein-coupled receptor                           | 2.03 | 5.231  | 1 |
| 3137 | IPI:IPI00308149.1 | Ccny;LOC100044842 Isoform 1 of Cyclin-Y                                      | 2.03 | 4.399  | 1 |
| 3138 | IPI:IPI00317604.1 | Sec23b Protein transport protein Sec23B                                      | 2.03 | 5.346  | 3 |
| 3139 | IPI:IPI00409345.3 | Cryl1 Lambda-crystallin homolog                                              | 2.03 | 8.777  | 2 |
| 3140 | IPI:IPI00121198.2 | Gtf2a1 Transcription initiation factor IIA subunit 1                         | 2.03 | 7.407  | 3 |
| 3141 | IPI:IPI00115626.1 | Ppap2b Lipid phosphate phosphohydrolase 3                                    | 2.03 | 3.526  | 1 |
| 3142 | IPI:IPI00274656.6 | Pmpcb Mitochondrial-processing peptidase subunit beta                        | 2.03 | 5.726  | 3 |
| 3143 | IPI:IPI00122466.3 | BC017643 Uncharacterized protein C17orf62 homolog                            | 2.03 | 5.348  | 1 |



|      |                   |                                                                                 |      |        |    |
|------|-------------------|---------------------------------------------------------------------------------|------|--------|----|
| 3144 | IPI:IPI00831418.1 | Sdhc Uncharacterized protein                                                    | 2.03 | 5.926  | 1  |
| 3145 | IPI:IPI00319131.4 | Pex19 Isoform 1 of Peroxisomal biogenesis factor 19                             | 2.03 | 5.017  | 1  |
| 3146 | IPI:IPI00224075.1 | Cpne1 Copine-1                                                                  | 2.03 | 2.985  | 1  |
| 3147 | IPI:IPI00127464.1 | Atp8a2 Probable phospholipid-transporting ATPase IB                             | 2.03 | 1.916  | 3  |
| 3148 | IPI:IPI00131488.3 | Pofut1 GDP-fucose protein O-fucosyltransferase 1                                | 2.03 | 4.071  | 1  |
| 3149 | IPI:IPI00649603.1 | Ate1 Arginyl-tRNA--protein transferase 1                                        | 2.03 | 3.34   | 3  |
| 3150 | IPI:IPI00468996.2 | Wasl Neural Wiskott-Aldrich syndrome protein                                    | 2.03 | 5.788  | 1  |
| 3151 | IPI:IPI00331631.1 | Stim1;LOC100045432 Stromal interaction molecule 1, isoform CRA_a                | 2.03 | 1.314  | 1  |
| 3152 | IPI:IPI00857684.1 | Yif1b Isoform 2 of Protein YIF1B                                                | 2.03 | 8.117  | 2  |
| 3153 | IPI:IPI00283156.1 | Gm6570 Uncharacterized protein                                                  | 2.03 | 13.91  | 1  |
| 3154 | IPI:IPI00229487.1 | Cbfb Isoform 2 of Core-binding factor subunit beta                              | 2.03 | 8.791  | 1  |
| 3155 | IPI:IPI00330933.6 | Apip Probable methylthioribulose-1-phosphate dehydratase                        | 2.03 | 3.32   | 1  |
| 3156 | IPI:IPI00223783.2 | Plin1 Isoform 1 of Perilipin-1                                                  | 2.03 | 2.901  | 1  |
| 3157 | IPI:IPI00277930.6 | Capg Putative uncharacterized protein                                           | 2.03 | 3.714  | 1  |
| 3158 | IPI:IPI00312507.2 | Opa3 Optic atrophy 3 protein homolog                                            | 2.03 | 6.704  | 1  |
| 3159 | IPI:IPI00169667.1 | Cnot3 CCR4-NOT transcription complex subunit 3                                  | 2.03 | 1.997  | 1  |
| 3160 | IPI:IPI00929839.1 | Actr10 ARP10 actin-related protein 10                                           | 2.03 | 11.03  | 4  |
| 3161 | IPI:IPI00929847.1 | Fkbp15 Isoform A of FK506-binding protein 15                                    | 2.03 | 1.974  | 2  |
| 3162 | IPI:IPI00137094.1 | Clvs1 Isoform 1 of Clavesin-1                                                   | 2.03 | 5.085  | 1  |
| 3163 | IPI:IPI00229726.2 | Tarsl2 Probable threonyl-tRNA synthetase 2, cytoplasmic                         | 2.03 | 1.139  | 1  |
| 3164 | IPI:IPI00116302.3 | Eif2s2 Eukaryotic translation initiation factor 2 subunit 2                     | 2.03 | 4.532  | 1  |
| 3165 | IPI:IPI00480321.2 | Grf1 Glucocorticoid receptor DNA-binding factor 1                               | 2.03 | 0.6004 | 1  |
| 3166 | IPI:IPI00129774.1 | Kcna2 Potassium voltage-gated channel subfamily A member 2                      | 2.03 | 3.006  | 1  |
| 3167 | IPI:IPI00113731.2 | Degs1 Sphingolipid delta(4)-desaturase DES1                                     | 2.03 | 5.573  | 1  |
| 3168 | IPI:IPI00127406.1 | Plod3 Procollagen-lysine,2-oxoglutarate 5-dioxygenase 3                         | 2.03 | 1.484  | 1  |
| 3169 | IPI:IPI00720145.1 | Slco3a1 Isoform 2 of Solute carrier organic anion transporter family member 3A1 | 2.03 | 1.012  | 1  |
| 3170 | IPI:IPI00120709.1 | Mrps34 28S ribosomal protein S34, mitochondrial                                 | 2.03 | 4.587  | 1  |
| 3171 | IPI:IPI00467124.2 | Coq3 Hexaprenyldihydroxybenzoate methyltransferase, mitochondrial               | 2.03 | 4.054  | 1  |
| 3172 | IPI:IPI00867926.1 | Vmn2r65 vomeronasal 2, receptor 65                                              | 2.03 | 1.42   | 3  |
| 3173 | IPI:IPI00229931.1 | Tbce Tubulin-specific chaperone E                                               | 2.03 | 2.29   | 1  |
| 3174 | IPI:IPI00845595.1 | Dnm1 Isoform 2 of Dynamin-1                                                     | 2.03 | 48.9   | 45 |
| 3175 | IPI:IPI00336889.4 | Atp2a3 Isoform SERCA3B of Sarcoplasmic/endoplasmic reticulum calcium ATPase 3   | 2.03 | 6.551  | 8  |

|      |                   |                                                                                  |      |        |    |
|------|-------------------|----------------------------------------------------------------------------------|------|--------|----|
| 3176 | IPI:IPI00338887.3 | Prpf40a Isoform 2 of Pre-mRNA-processing factor 40 homolog A                     | 2.03 | 3.622  | 2  |
| 3177 | IPI:IPI00624883.2 | Atp2c1;LOC100045884 Putative uncharacterized protein                             | 2.03 | 2.416  | 1  |
| 3178 | IPI:IPI00554838.1 | Atg16l1 Isoform 5 of Autophagy-related protein 16-1                              | 2.03 | 1.983  | 1  |
| 3179 | IPI:IPI00330873.1 | LOC100047670;Rmnd5a Protein RMD5 homolog A                                       | 2.03 | 3.069  | 1  |
| 3180 | IPI:IPI00623830.2 | BC006779 BC006779 protein                                                        | 2.03 | 0.4476 | 1  |
| 3181 | IPI:IPI00761433.2 | Rims1 143 kDa protein                                                            | 2.03 | 1.707  | 1  |
| 3182 | IPI:IPI00331293.3 | Dnm1 Isoform 4 of Dynamin-1                                                      | 2.02 | 45.72  | 61 |
| 3183 | IPI:IPI00671957.2 | Gls glutaminase isoform 2                                                        | 2.02 | 30.51  | 16 |
| 3184 | IPI:IPI00123878.4 | Ddx39 Isoform 1 of ATP-dependent RNA helicase DDX39                              | 2.02 | 18.97  | 17 |
| 3185 | IPI:IPI00757755.1 | Prkcb 77 kDa protein                                                             | 2.02 | 4.322  | 4  |
| 3186 | IPI:IPI00336313.2 | Ppp1r9a Protein phosphatase 1, regulatory (Inhibitor) subunit 9A, isoform CRA_c  | 2.02 | 2.466  | 2  |
| 3187 | IPI:IPI00153798.1 | Hexim1 Protein HEXIM1                                                            | 2.02 | 5.618  | 2  |
| 3188 | IPI:IPI00467229.2 | Faim2 Isoform 2 of Fas apoptotic inhibitory molecule 2                           | 2.02 | 7.213  | 1  |
| 3189 | IPI:IPI00266752.2 | Cpne3 Copine-3                                                                   | 2.02 | 4.69   | 4  |
| 3190 | IPI:IPI00221649.1 | Nfkb1 Isoform 2 of Nuclear factor NF-kappa-B p105 subunit                        | 2.02 | 0.8963 | 1  |
| 3191 | IPI:IPI00110280.4 | Ppil4 Peptidyl-prolyl cis-trans isomerase-like 4                                 | 2.02 | 4.878  | 1  |
| 3192 | IPI:IPI00845541.1 | Gpx3 glutathione peroxidase 3 isoform 1                                          | 2.02 | 6.855  | 2  |
| 3193 | IPI:IPI00461860.3 | Ctr9 Isoform 3 of RNA polymerase-associated protein CTR9 homolog                 | 2.02 | 1.009  | 1  |
| 3194 | IPI:IPI00229813.1 | Prpf6 Isoform 2 of Pre-mRNA-processing factor 6                                  | 2.02 | 1.404  | 1  |
| 3195 | IPI:IPI00170212.2 | Cox16 Activin receptor-interacting protein 2a                                    | 2.02 | 7.843  | 1  |
| 3196 | IPI:IPI00652516.2 | Eml4 Isoform 1 of Echinoderm microtubule-associated protein-like 4               | 2.02 | 1.215  | 1  |
| 3197 | IPI:IPI00894922.1 | Phc2 Polyhomeotic-like 2                                                         | 2.02 | 1.882  | 1  |
| 3198 | IPI:IPI00221845.1 | Atcay Caytaxin                                                                   | 2.02 | 3.226  | 1  |
| 3199 | IPI:IPI00655222.1 | Smap2 Isoform 1 of Stromal membrane-associated protein 2                         | 2.02 | 6.776  | 2  |
| 3200 | IPI:IPI00117986.3 | Slc12a9 Solute carrier family 12 member 9                                        | 2.02 | 1.751  | 1  |
| 3201 | IPI:IPI00970487.1 | Ipo9 Uncharacterized protein                                                     | 2.02 | 32.73  | 1  |
| 3202 | IPI:IPI00116668.2 | Ilk Integrin-linked protein kinase                                               | 2.02 | 2.212  | 1  |
| 3203 | IPI:IPI00355669.2 | Rdh8 Uncharacterized protein                                                     | 2.02 | 4.101  | 1  |
| 3204 | IPI:IPI00309768.7 | Pdlim1 PDZ and LIM domain protein 1                                              | 2.02 | 4.587  | 1  |
| 3205 | IPI:IPI00230721.5 | Crabp1 Cellular retinoic acid-binding protein 1                                  | 2.02 | 7.299  | 1  |
| 3206 | IPI:IPI00133193.3 | Gadd45gip1 Growth arrest and DNA damage-inducible proteins-interacting protein 1 | 2.02 | 4.505  | 1  |
| 3207 | IPI:IPI00133061.3 | Rbm7 RNA-binding protein 7                                                       | 2.02 | 6.792  | 1  |
| 3208 | IPI:IPI00120346.3 | Rab27b Ras-related protein Rab-27B                                               | 2.02 | 10.09  | 2  |

|      |                   |                                                                           |      |        |    |
|------|-------------------|---------------------------------------------------------------------------|------|--------|----|
| 3209 | IPI:IPI00109437.1 | Pir Pirin                                                                 | 2.02 | 4.743  | 1  |
| 3210 | IPI:IPI00653723.1 | Poldip3 Putative uncharacterized protein                                  | 2.02 | 5.882  | 2  |
| 3211 | IPI:IPI00457544.1 | Icmt protein-S-isoprenylcysteine O-methyltransferase                      | 2.02 | 3.521  | 1  |
| 3212 | IPI:IPI00623531.4 | Dst Isoform 6 of Bullous pemphigoid antigen 1                             | 2.02 | 1.19   | 3  |
| 3213 | IPI:IPI00222043.2 | Itp2 Isoform 2 of Inositol 1,4,5-trisphosphate receptor type 2            | 2.02 | 1.249  | 1  |
| 3214 | IPI:IPI00858230.1 | Comt1 Uncharacterized protein                                             | 2.02 | 14.62  | 3  |
| 3215 | IPI:IPI00124416.1 | Cabp5;LOC100046558 Calcium-binding protein 5                              | 2.02 | 7.514  | 1  |
| 3216 | IPI:IPI00122075.1 | Mavs Mitochondrial antiviral-signaling protein                            | 2.02 | 7.356  | 2  |
| 3217 | IPI:IPI00230601.1 | Fxr1 Isoform F of Fragile X mental retardation syndrome-related protein 1 | 2.02 | 2.778  | 1  |
| 3218 | IPI:IPI00225209.1 | Ilvbl Isoform 1 of Acetolactate synthase-like protein                     | 2.02 | 3.481  | 1  |
| 3219 | IPI:IPI00461500.1 | Rpl29-ps2 Uncharacterized protein                                         | 2.02 | 5      | 1  |
| 3220 | IPI:IPI00268927.1 | Nudcd3 Isoform 1 of NudC domain-containing protein 3                      | 2.02 | 4.132  | 1  |
| 3221 | IPI:IPI00130627.1 | Lgmn Legumain                                                             | 2.02 | 3.908  | 1  |
| 3222 | IPI:IPI00347275.3 | Vps24 Charged multivesicular body protein 3                               | 2.02 | 5.357  | 1  |
| 3223 | IPI:IPI00857736.1 | Safb2 Scaffold attachment factor B2                                       | 2.02 | 5.853  | 4  |
| 3224 | IPI:IPI00753917.2 | Fnc Uncharacterized protein                                               | 2.02 | 1.294  | 4  |
| 3225 | IPI:IPI00648065.1 | Bbs7 Bardet-Biedl syndrome 7, isoform CRA_e                               | 2.02 | 2.378  | 1  |
| 3226 | IPI:IPI00381303.5 | Man2b1 Lysosomal alpha-mannosidase                                        | 2.02 | 1.382  | 1  |
| 3227 | IPI:IPI00421240.5 | Spag17-ps Sperm-associated antigen 17                                     | 2.02 | 0.4138 | 1  |
| 3228 | IPI:IPI00621842.6 | Enah protein enabled homolog isoform 1                                    | 2.02 | 1.244  | 1  |
| 3229 | IPI:IPI00381019.1 | Smarcc2 Isoform 2 of SWI/SNF complex subunit SMARCC2                      | 2.02 | 1.365  | 1  |
| 3230 | IPI:IPI00116681.3 | Chkb Choline/ethanolamine kinase                                          | 2.02 | 4.822  | 1  |
| 3231 | IPI:IPI00329871.1 | Zfyve1 Zinc finger FYVE domain-containing protein 1                       | 2.02 | 1.931  | 1  |
| 3232 | IPI:IPI00127364.1 | Epn3 Epsin-3                                                              | 2.02 | 1.572  | 1  |
| 3233 | IPI:IPI00648479.2 | Ccdc47 Isoform 2 of Coiled-coil domain-containing protein 47              | 2.02 | 2.096  | 1  |
| 3234 | IPI:IPI00624876.3 | Vasp Vasodilator-stimulated phosphoprotein                                | 2.02 | 2.667  | 1  |
| 3235 | IPI:IPI00857856.1 | Nosip Uncharacterized protein                                             | 2.02 | 4.977  | 1  |
| 3236 | IPI:IPI00798442.1 | 6530401N04Rik Isoform 2 of Probable D-tyrosyl-tRNA(Tyr) deacylase 2       | 2.02 | 13.25  | 1  |
| 3237 | IPI:IPI00114936.1 | Atg5 Autophagy protein 5                                                  | 2.02 | 6.909  | 1  |
| 3238 | IPI:IPI00753102.2 | Gm9034 similar to Glyceraldehyde-3-phosphate dehydrogenase                | 2.02 | 49.25  | 31 |
| 3239 | IPI:IPI00666471.2 | LOC630527 similar to eIF-4E                                               | 2.02 | 9.677  | 2  |
| 3240 | IPI:IPI00223800.5 | Pcbd1 Pterin-4-alpha-carbinolamine dehydratase                            | 2.02 | 13.46  | 1  |
| 3241 | IPI:IPI00165881.3 | Pxn Isoform Beta of Paxillin                                              | 2.02 | 2.2    | 1  |
| 3242 | IPI:IPI00122559.3 | Ktn1 Isoform 1 of Kinectin                                                | 2.02 | 15.98  | 15 |

|      |                   |                                                                                    |      |        |    |
|------|-------------------|------------------------------------------------------------------------------------|------|--------|----|
| 3243 | IPI:IPI00408500.2 | Purg Isoform 2 of Purine-rich element-binding protein gamma                        | 2.02 | 9.538  | 3  |
| 3244 | IPI:IPI00648298.2 | Ptprf Protein tyrosine phosphatase, receptor type, F                               | 2.02 | 1.379  | 2  |
| 3245 | IPI:IPI00605518.1 | LOC100048867 similar to Annexin A2                                                 | 2.02 | 6.272  | 1  |
| 3246 | IPI:IPI00830309.1 | Naa10 N-acetyltransferase ARD1 homolog                                             | 2.02 | 4.545  | 1  |
| 3247 | IPI:IPI00122227.1 | Rnps1 RNA/DNA-binding protein                                                      | 2.02 | 7.397  | 1  |
| 3248 | IPI:IPI00137792.1 | Smpd1 Sphingomyelin phosphodiesterase                                              | 2.02 | 1.754  | 1  |
| 3249 | IPI:IPI00654397.1 | Cox16 Putative uncharacterized protein                                             | 2.02 | 6.593  | 1  |
| 3250 | IPI:IPI00816854.1 | Cpeb3 Isoform 5 of Cytoplasmic polyadenylation element-binding protein 3           | 2.02 | 2.139  | 1  |
| 3251 | IPI:IPI00378485.2 | Atp1a4 Sodium/potassium-transporting ATPase subunit alpha-4                        | 2.01 | 11.63  | 43 |
| 3252 | IPI:IPI00467152.4 | Gnai1 guanine nucleotide binding protein, alpha inhibiting 1                       | 2.01 | 24.58  | 16 |
| 3253 | IPI:IPI00109441.1 | Smyd3 SET and MYND domain-containing protein 3                                     | 2.01 | 3.738  | 2  |
| 3254 | IPI:IPI00275050.2 | Dap3 28S ribosomal protein S29, mitochondrial isoform 2                            | 2.01 | 6.061  | 3  |
| 3255 | IPI:IPI00380299.2 | Akap7 A-kinase anchor protein 7                                                    | 2.01 | 3.503  | 2  |
| 3256 | IPI:IPI00463493.1 | Gbf1 Golgi-specific brefeldin A-resistance factor 1                                | 2.01 | 0.8598 | 2  |
| 3257 | IPI:IPI00114618.1 | Lrsam1;4930555K19Rik E3 ubiquitin-protein ligase LRSAM1                            | 2.01 | 2.476  | 2  |
| 3258 | IPI:IPI00845729.1 | Acbd5 Isoform 2 of Acyl-CoA-binding domain-containing protein 5                    | 2.01 | 4.661  | 2  |
| 3259 | IPI:IPI00955120.1 | Usp19 ubiquitin carboxyl-terminal hydrolase 19 isoform 5                           | 2.01 | 2.232  | 2  |
| 3260 | IPI:IPI00314204.5 | Adck4 Uncharacterized aarF domain-containing protein kinase 4                      | 2.01 | 2.064  | 1  |
| 3261 | IPI:IPI00131084.3 | Dync1i1 Isoform 1A of Cytoplasmic dynein 1 intermediate chain 1                    | 2.01 | 4.777  | 2  |
| 3262 | IPI:IPI00222838.3 | Mipep Mitochondrial intermediate peptidase                                         | 2.01 | 3.506  | 2  |
| 3263 | IPI:IPI00311591.3 | Ube2z Ubiquitin-conjugating enzyme E2 Z                                            | 2.01 | 4.775  | 3  |
| 3264 | IPI:IPI00515708.3 | Ptpn2 Isoform PTPB of Tyrosine-protein phosphatase non-receptor type 2             | 2.01 | 3.448  | 1  |
| 3265 | IPI:IPI00120571.3 | Arfgap2 Isoform 1 of ADP-ribosylation factor GTPase-activating protein 2           | 2.01 | 2.885  | 1  |
| 3266 | IPI:IPI00340815.3 | Rbm15 RNA binding motif protein 15                                                 | 2.01 | 2.391  | 1  |
| 3267 | IPI:IPI00404052.3 | Mpdz Isoform 2 of Multiple PDZ domain protein                                      | 2.01 | 1.384  | 2  |
| 3268 | IPI:IPI00229353.1 | Plch1 Isoform 5 of 1-phosphatidylinositol-4,5-bisphosphate phosphodiesterase eta-1 | 2.01 | 2.245  | 1  |
| 3269 | IPI:IPI00153241.1 | Vps37c Isoform 1 of Vacuolar protein sorting-associated protein 37C                | 2.01 | 6.25   | 2  |
| 3270 | IPI:IPI00855162.2 | 4932431P20Rik;LOC634091 similar to hCG1785223                                      | 2.01 | 0.4523 | 2  |
| 3271 | IPI:IPI00626909.1 | Capn1 Calpain-1 catalytic subunit                                                  | 2.01 | 2.525  | 1  |

|      |                   |                                                                          |      |        |    |
|------|-------------------|--------------------------------------------------------------------------|------|--------|----|
| 3272 | IPI:IPI00224294.2 | Man2a2 N-glycan processing alpha-mannosidase IIx                         | 2.01 | 1.476  | 1  |
| 3273 | IPI:IPI00111014.1 | Elovl4 Elongation of very long chain fatty acids protein 4               | 2.01 | 2.885  | 1  |
| 3274 | IPI:IPI00515319.2 | Ptgfrn prostaglandin F2 receptor negative regulator precursor            | 2.01 | 1.593  | 1  |
| 3275 | IPI:IPI00850638.1 | Gm3724 similar to GEF-2                                                  | 2.01 | 11.11  | 1  |
| 3276 | IPI:IPI00352986.2 | Strn Striatin                                                            | 2.01 | 2.179  | 1  |
| 3277 | IPI:IPI00666885.4 | Dnajc13 Receptor mediated endocytosis-8                                  | 2.01 | 1.157  | 1  |
| 3278 | IPI:IPI00229810.4 | Plekha5 phosphoinositol 3-phosphate-binding protein-2                    | 2.01 | 1.103  | 1  |
| 3279 | IPI:IPI00623737.2 | Acot11 Acyl-CoA thioesterase 11                                          | 2.01 | 1.629  | 1  |
| 3280 | IPI:IPI00653791.2 | Tbc1d22a Isoform 2 of TBC1 domain family member 22A                      | 2.01 | 1.533  | 1  |
| 3281 | IPI:IPI00411109.4 | Caskin1 Isoform 1 of Caskin-1                                            | 2.01 | 1.048  | 1  |
| 3282 | IPI:IPI00381148.1 | Nckap5l Nck-associated protein 5-like                                    | 2.01 | 0.6047 | 1  |
| 3283 | IPI:IPI00121364.2 | Aspscr1 Isoform 1 of Tether containing UBX domain for GLUT4              | 2.01 | 2.545  | 1  |
| 3284 | IPI:IPI00624984.1 | Gm9923 similar to Hbs1l protein                                          | 2.01 | 2.941  | 1  |
| 3285 | IPI:IPI00830866.1 | Drap1 Uncharacterized protein                                            | 2.01 | 6.79   | 1  |
| 3286 | IPI:IPI00757072.2 | Gm2058 predicted gene 2058                                               | 2.01 | 8.197  | 1  |
| 3287 | IPI:IPI00132487.1 | Mrp63 Ribosomal protein 63, mitochondrial                                | 2.01 | 12.75  | 1  |
| 3288 | IPI:IPI00111420.1 | Yipf5 Protein YIPF5                                                      | 2.01 | 3.502  | 1  |
| 3289 | IPI:IPI00134652.3 | Col7a1 Collagen alpha-1(VII) chain                                       | 2.01 | 0.3057 | 1  |
| 3290 | IPI:IPI00462519.1 | Katnal2 Isoform 2 of Katanin p60 ATPase-containing subunit A-like 2      | 2.01 | 5.069  | 1  |
| 3291 | IPI:IPI00970649.1 | A1837181 basophilic leukemia expressed protein BLES03                    | 2.01 | 8.389  | 2  |
| 3292 | IPI:IPI00330729.4 | Csnk1a1 Isoform 1 of Casein kinase I isoform alpha                       | 2.01 | 3.561  | 1  |
| 3293 | IPI:IPI00831119.1 | Lypla1 Uncharacterized protein                                           | 2.01 | 5.612  | 1  |
| 3294 | IPI:IPI00114401.1 | Emd Emerin                                                               | 2.01 | 5.294  | 1  |
| 3295 | IPI:IPI00850715.1 | Gm3386;LOC100047065 hypothetical protein isoform 2                       | 2.01 | 14.29  | 1  |
| 3296 | IPI:IPI00953773.1 | Ssr4 translocon-associated protein subunit delta isoform 1 precursor     | 2.01 | 10.98  | 1  |
| 3297 | IPI:IPI00227838.4 | Gng12 Guanine nucleotide-binding protein G(I)/G(S)/G(O) subunit gamma-12 | 2.01 | 19.44  | 1  |
| 3298 | IPI:IPI00132747.5 | Hbxip hepatitis B virus X-interacting protein homolog                    | 2.01 | 13.79  | 1  |
| 3299 | IPI:IPI00113196.1 | Cox7a1 Cytochrome c oxidase subunit 7A1, mitochondrial                   | 2.01 | 16.25  | 1  |
| 3300 | IPI:IPI00225389.1 | Snap25 Isoform SNAP-25a of Synaptosomal-associated protein 25            | 2.01 | 61.65  | 27 |
| 3301 | IPI:IPI00321860.1 | Pdcl Phosducin-like protein                                              | 2.01 | 14.29  | 4  |
| 3302 | IPI:IPI00170345.1 | Cdc73 Parafibromin                                                       | 2.01 | 3.766  | 1  |

|      |                   |                                                                                |      |        |    |
|------|-------------------|--------------------------------------------------------------------------------|------|--------|----|
| 3303 | IPI:IPI00320303.1 | Nup133 Nuclear pore complex protein Nup133                                     | 2.01 | 1.818  | 1  |
| 3304 | IPI:IPI00869397.1 | Fbxo7 F-box only protein 7                                                     | 2.01 | 3.25   | 1  |
| 3305 | IPI:IPI00322760.7 | Prodh proline dehydrogenase, mitochondrial                                     | 2.01 | 3.005  | 1  |
| 3306 | IPI:IPI00387392.4 | Slc25a46 Solute carrier family 25 member 46                                    | 2.01 | 2.632  | 1  |
| 3307 | IPI:IPI00457532.2 | Ppil3 Isoform 1 of Peptidyl-prolyl cis-trans isomerase-like 3                  | 2.01 | 16.15  | 2  |
| 3308 | IPI:IPI00109131.1 | AU022252 Uncharacterized protein C1orf50 homolog                               | 2.01 | 8.04   | 1  |
| 3309 | IPI:IPI00129907.7 | Acbd3 Golgi resident protein GCP60                                             | 2.01 | 3.048  | 1  |
| 3310 | IPI:IPI00120715.1 | Tom20;Gm14494;LOC100044630 Mitochondrial import receptor subunit TOM20 homolog | 2.01 | 8.966  | 1  |
| 3311 | IPI:IPI00850073.1 | Gm12013 similar to ribosomal protein L39                                       | 2.01 | 15.87  | 2  |
| 3312 | IPI:IPI00395040.1 | Kcmf1 Isoform 1 of E3 ubiquitin-protein ligase KCMF1                           | 2.01 | 4.462  | 1  |
| 3313 | IPI:IPI00128268.2 | Dnajc9 DnaJ homolog subfamily C member 9                                       | 2.01 | 4.633  | 1  |
| 3314 | IPI:IPI00408986.6 | Lclat1 Lysocardiolipin acyltransferase 1                                       | 2.01 | 2.394  | 1  |
| 3315 | IPI:IPI00755057.1 | LOC677282 similar to Kcnj10 protein                                            | 2.01 | 3.977  | 2  |
| 3316 | IPI:IPI00223444.1 | Hnrnpc Isoform 3 of Heterogeneous nuclear ribonucleoproteins C1/C2             | 2.01 | 33.11  | 13 |
| 3317 | IPI:IPI00749932.1 | Gm12141 similar to Heat shock protein 1                                        | 2.01 | 11.47  | 10 |
| 3318 | IPI:IPI00132397.1 | Sar1b GTP-binding protein SAR1b                                                | 2.01 | 34.85  | 4  |
| 3319 | IPI:IPI00138394.3 | Atxn3 Ataxin-3                                                                 | 2.01 | 4.225  | 2  |
| 3320 | IPI:IPI00930798.1 | Smek1 serine/threonine-protein phosphatase 4 regulatory subunit 3A isoform 2   | 2.01 | 3.121  | 2  |
| 3321 | IPI:IPI00649662.1 | Ppih Peptidyl-prolyl cis-trans isomerase                                       | 2.01 | 17.72  | 2  |
| 3322 | IPI:IPI00656317.2 | Stxbp5 syntaxin-binding protein 5                                              | 2.01 | 2.061  | 2  |
| 3323 | IPI:IPI00129395.1 | Slc7a5 Large neutral amino acids transporter small subunit 1                   | 2.01 | 2.734  | 1  |
| 3324 | IPI:IPI00831145.1 | Pdpk1 61 kDa protein                                                           | 2.01 | 3.759  | 1  |
| 3325 | IPI:IPI00129985.1 | Cdr2 Cerebellar degeneration-related protein 2                                 | 2.01 | 3.077  | 1  |
| 3326 | IPI:IPI00133648.2 | Bccip BRCA2 and CDKN1A-interacting protein                                     | 2.01 | 7.278  | 1  |
| 3327 | IPI:IPI00830724.1 | Fndc1 fibronectin type III domain containing 1                                 | 2.01 | 0.4619 | 1  |
| 3328 | IPI:IPI00970078.1 | Osbp19 81 kDa protein                                                          | 2.01 | 1.53   | 1  |
| 3329 | IPI:IPI00109213.1 | Slc8a1 Sodium/calcium exchanger 1                                              | 2.01 | 1.031  | 1  |
| 3330 | IPI:IPI00109253.1 | 2900064A13Rik UPF0480 protein C15orf24 homolog                                 | 2.01 | 5.394  | 1  |
| 3331 | IPI:IPI00943363.1 | Dnajc17 dnaJ homolog subfamily C member 17                                     | 2.01 | 6.931  | 1  |
| 3332 | IPI:IPI00753321.2 | Bod1l biorientation of chromosomes in cell division 1-like                     | 2.01 | 0.6596 | 1  |
| 3333 | IPI:IPI00119930.2 | Prkag1 5'-AMP-activated protein kinase subunit gamma-1                         | 2.01 | 7.273  | 2  |
| 3334 | IPI:IPI00337955.1 | Polr2e DNA-directed RNA polymerases I, II, and III subunit RPABC1              | 2.01 | 8.095  | 1  |
| 3335 | IPI:IPI00109070.1 | Bbs2 Bardet-Biedl syndrome 2 protein homolog                                   | 2.01 | 1.942  | 2  |

|      |                   |                                                                                               |      |        |    |
|------|-------------------|-----------------------------------------------------------------------------------------------|------|--------|----|
| 3336 | IPI:IPI00387249.1 | Fam82b Regulator of microtubule dynamics protein 1                                            | 2.01 | 3.607  | 1  |
| 3337 | IPI:IPI00132504.1 | Mrps30 28S ribosomal protein S30, mitochondrial                                               | 2.01 | 4.751  | 1  |
| 3338 | IPI:IPI00466640.2 | Tmed5;LOC100046567 Transmembrane emp24 domain-containing protein 5                            | 2.01 | 5.24   | 1  |
| 3339 | IPI:IPI00762362.1 | Rpl22l1 Isoform 2 of 60S ribosomal protein L22-like 1                                         | 2.01 | 19.83  | 1  |
| 3340 | IPI:IPI00454042.2 | Fam3c Protein FAM3C                                                                           | 2.01 | 8.37   | 1  |
| 3341 | IPI:IPI00943999.1 | Crb2 Crumbs homolog 2                                                                         | 2.01 | 1.092  | 1  |
| 3342 | IPI:IPI00222845.2 | Celf4 Isoform 7 of CUGBP Elav-like family member 4                                            | 2.01 | 4.908  | 1  |
| 3343 | IPI:IPI00970519.1 | Sgtb Uncharacterized protein                                                                  | 2.01 | 8.197  | 1  |
| 3344 | IPI:IPI00404467.1 | Cabp4 Putative uncharacterized protein (Fragment)                                             | 2.01 | 15.44  | 1  |
| 3345 | IPI:IPI00877288.1 | Pgcp Isoform 2 of Plasma glutamate carboxypeptidase                                           | 2.01 | 6.114  | 2  |
| 3346 | IPI:IPI00113079.2 | Mapkapk2 MAP kinase-activated protein kinase 2                                                | 2.01 | 4.404  | 1  |
| 3347 | IPI:IPI00221528.1 | Actbl2 Beta-actin-like protein 2                                                              | 2.01 | 30.05  | 43 |
| 3348 | IPI:IPI00347770.3 | Gnat3 Guanine nucleotide-binding protein G(t) subunit alpha-3                                 | 2.01 | 22.6   | 14 |
| 3349 | IPI:IPI00323442.8 | Slc4a8 Isoform 1 of Electroneutral sodium bicarbonate exchanger 1                             | 2.01 | 2.296  | 2  |
| 3350 | IPI:IPI00350631.6 | Cog3 conserved oligomeric Golgi complex subunit 3                                             | 2.01 | 1.449  | 1  |
| 3351 | IPI:IPI00467555.2 | Rabep1 rab GTPase-binding effector protein 1                                                  | 2.01 | 1.856  | 1  |
| 3352 | IPI:IPI00673345.1 | LOC675032 similar to polymyositis scleroderma overlap syndrome (PM-SCL) antigen 1 a isoform 6 | 2.01 | 3.89   | 2  |
| 3353 | IPI:IPI00750931.1 | Zc3h4 Isoform 1 of Zinc finger CCCH domain-containing protein 4                               | 2.01 | 1.227  | 1  |
| 3354 | IPI:IPI00126796.3 | Slc27a4 Long-chain fatty acid transport protein 4                                             | 2.01 | 2.799  | 1  |
| 3355 | IPI:IPI00381328.6 | LOC434624 similar to ferritin light chain 2                                                   | 2.01 | 5.797  | 1  |
| 3356 | IPI:IPI00845690.1 | Ccbl2 Isoform 1 of Kynurenine--oxoglutarate transaminase 3                                    | 2.01 | 2.637  | 1  |
| 3357 | IPI:IPI00113796.3 | Inpp5k Inositol polyphosphate 5-phosphatase K                                                 | 2.01 | 2.35   | 1  |
| 3358 | IPI:IPI00129383.1 | Mettl1 tRNA (guanine-N(7)-)-methyltransferase                                                 | 2.01 | 2.612  | 1  |
| 3359 | IPI:IPI00323177.2 | Rars2 Probable arginyl-tRNA synthetase, mitochondrial                                         | 2.01 | 2.941  | 1  |
| 3360 | IPI:IPI00828271.4 | Dos Protein Dos                                                                               | 2.01 | 1.418  | 1  |
| 3361 | IPI:IPI00112139.1 | Ociad2 OCIA domain-containing protein 2                                                       | 2.01 | 8.442  | 1  |
| 3362 | IPI:IPI00890038.2 | Syne1 Isoform 4 of Nesprin-1                                                                  | 2.01 | 0.2615 | 1  |
| 3363 | IPI:IPI00775999.1 | Dcun1d2 DCN1-like protein 2 isoform b                                                         | 2.01 | 8.213  | 1  |
| 3364 | IPI:IPI00881699.1 | Cutc Uncharacterized protein                                                                  | 2.01 | 7.087  | 1  |
| 3365 | IPI:IPI00661702.2 | LOC641175 similar to Cdv3 protein                                                             | 2.01 | 1.891  | 1  |
| 3366 | IPI:IPI00874889.1 | Mtx2 Metaxin 2                                                                                | 2.01 | 8.365  | 1  |

|      |                   |                                                                          |      |       |     |
|------|-------------------|--------------------------------------------------------------------------|------|-------|-----|
| 3367 | IPI:IPI00275210.3 | Lcn11 Lipocalin 11                                                       | 2.01 | 7.865 | 1   |
| 3368 | IPI:IPI00310239.4 | Nccrp1 non-specific cytotoxic cell receptor protein 1 homolog            | 2.01 | 3.093 | 1   |
| 3369 | IPI:IPI00121420.1 | Hspb2 Isoform 1 of Heat shock protein beta-2                             | 2.01 | 9.89  | 1   |
| 3370 | IPI:IPI00122554.3 | Cabc1 Isoform 1 of Chaperone activity of bc1 complex-like, mitochondrial | 2.01 | 2.481 | 2   |
| 3371 | IPI:IPI00474590.1 | Bcl2l1 Bcl-x-gamma                                                       | 2.01 | 4.255 | 1   |
| 3372 | IPI:IPI00321386.2 | Abhd6 Isoform 1 of Monoacylglycerol lipase ABHD6                         | 2.01 | 4.464 | 1   |
| 3373 | IPI:IPI00626928.1 | Tmem65 Transmembrane protein 65                                          | 2.01 | 4.701 | 1   |
| 3374 | IPI:IPI00137206.1 | Actr10 Actin-related protein 10                                          | 2.01 | 6.475 | 2   |
| 3375 | IPI:IPI00131463.3 | Stk25 Serine/threonine-protein kinase 25                                 | 2.01 | 4.695 | 2   |
| 3376 | IPI:IPI00137658.3 | Krt24 Keratin, type I cytoskeletal 24                                    | 2.01 | 3.125 | 1   |
| 3377 | IPI:IPI00222935.3 | Itgb8 Integrin beta                                                      | 2.01 | 2.216 | 1   |
| 3378 | IPI:IPI00230416.5 | Eif2s3y Eukaryotic translation initiation factor 2 subunit 3, Y-linked   | 2.01 | 5.297 | 1   |
| 3379 | IPI:IPI00356872.3 | Ppp2r5b Putative uncharacterized protein                                 | 2.01 | 2.616 | 1   |
| 3380 | IPI:IPI00122529.1 | Rnpep Aminopeptidase B                                                   | 2.01 | 3.846 | 1   |
| 3381 | IPI:IPI00656182.1 | Ufd1l Putative uncharacterized protein                                   | 2.01 | 3.745 | 1   |
| 3382 | IPI:IPI00133518.2 | Cacnb3 Voltage-dependent L-type calcium channel subunit beta-3           | 2.01 | 1.24  | 1   |
| 3383 | IPI:IPI00453632.1 | Casc4 Isoform 1 of Protein CASC4                                         | 2.01 | 3.908 | 1   |
| 3384 | IPI:IPI00857500.1 | Ccdc83 Uncharacterized protein                                           | 2.01 | 4.4   | 1   |
| 3385 | IPI:IPI00875082.1 | Gm2382 5, 10-methenyltetrahydrofolate synthetase-like                    | 2.01 | 12.32 | 1   |
| 3386 | IPI:IPI00944685.1 | March5 E3 ubiquitin-protein ligase MARCH5 isoform 3                      | 2.01 | 5.921 | 1   |
| 3387 | IPI:IPI00314106.3 | Cecr5 Cat eye syndrome critical region protein 5 homolog                 | 2.01 | 2.148 | 1   |
| 3388 | IPI:IPI00134044.1 | Mphosph6 M-phase phosphoprotein 6                                        | 2.01 | 9.317 | 1   |
| 3389 | IPI:IPI00133122.3 | Mrpl50 39S ribosomal protein L50, mitochondrial                          | 2.01 | 10.69 | 1   |
| 3390 | IPI:IPI00654268.1 | Rgs9 regulator of G-protein signaling 9 isoform 2                        | 2    | 24.17 | 9   |
| 3391 | IPI:IPI00850517.1 | Gm4684 similar to lacrimal androgen-binding protein delta isoform 1      | 2    | 57.14 | 7   |
| 3392 | IPI:IPI00663587.1 | Rbmxrt heterogeneous nuclear ribonucleoprotein G                         | 2    | 19.85 | 9   |
| 3393 | IPI:IPI00338039.1 | Tubb2a Tubulin beta-2A chain                                             | 2    | 75.96 | 222 |
| 3394 | IPI:IPI00850955.1 | Gm3534 similar to Glyceraldehyde-3-phosphate dehydrogenase               | 2    | 65.31 | 213 |
| 3395 | IPI:IPI00230665.2 | Ncam1 Isoform 2 of Neural cell adhesion molecule 1                       | 2    | 46.7  | 57  |
| 3396 | IPI:IPI00752685.2 | Gm8055 similar to Glyceraldehyde-3-phosphate dehydrogenase               | 2    | 55.22 | 68  |
| 3397 | IPI:IPI00890112.2 | Aldh3a1 Aldh3a1 protein                                                  | 2    | 37.67 | 27  |



|      |                   |                                                                                                        |   |       |    |
|------|-------------------|--------------------------------------------------------------------------------------------------------|---|-------|----|
| 3398 | IPI:IPI00749677.3 | Dnm2 Putative uncharacterized protein                                                                  | 2 | 16.23 | 22 |
| 3399 | IPI:IPI00856779.1 | Add1 73 kDa protein                                                                                    | 2 | 26.06 | 15 |
| 3400 | IPI:IPI00275539.6 | Rtn4 reticulon-4 isoform B2                                                                            | 2 | 58.93 | 26 |
| 3401 | IPI:IPI00854971.1 | LOC100046302 similar to Protein disulfide isomerase associated 6                                       | 2 | 35.29 | 13 |
| 3402 | IPI:IPI00111556.1 | Ppp2cb Serine/threonine-protein phosphatase 2A catalytic subunit beta isoform                          | 2 | 37.54 | 9  |
| 3403 | IPI:IPI00331597.6 | Hist1h1d Histone H1.3                                                                                  | 2 | 25.79 | 9  |
| 3404 | IPI:IPI00124979.2 | Rbmx RNA binding motif protein, X-linked                                                               | 2 | 19.69 | 9  |
| 3405 | IPI:IPI00113112.3 | Rab3b Ras-related protein Rab-3B                                                                       | 2 | 30.59 | 8  |
| 3406 | IPI:IPI00776339.1 | Rbbp7 Retinoblastoma binding protein 7                                                                 | 2 | 21.39 | 7  |
| 3407 | IPI:IPI00120193.1 | Cdc42 Isoform 1 of Cell division control protein 42 homolog                                            | 2 | 34.55 | 8  |
| 3408 | IPI:IPI00858058.1 | Crk V-crk sarcoma virus CT10 oncogene homolog (Avian), isoform CRA_c                                   | 2 | 36.27 | 5  |
| 3409 | IPI:IPI00890072.1 | - 13 kDa protein                                                                                       | 2 | 32.17 | 5  |
| 3410 | IPI:IPI00762507.2 | Iqsec1 Isoform 1 of IQ motif and SEC7 domain-containing protein 1                                      | 2 | 2.81  | 2  |
| 3411 | IPI:IPI00230349.9 | Map1lc3b Microtubule-associated proteins 1A/1B light chain 3B                                          | 2 | 22.4  | 3  |
| 3412 | IPI:IPI00884467.1 | Nudcd1 nudC domain-containing protein 1 isoform 2                                                      | 2 | 4.475 | 3  |
| 3413 | IPI:IPI00855023.1 | LOC100047521 similar to Solute carrier family 7 (cationic amino acid transporter, y+ system), member 5 | 2 | 10.44 | 2  |
| 3414 | IPI:IPI00457811.4 | Gm14135 similar to Cystatin-related protein 1 precursor                                                | 2 | 12.57 | 2  |
| 3415 | IPI:IPI00474943.2 | Tprkb Tprkb protein                                                                                    | 2 | 20.89 | 2  |
| 3416 | IPI:IPI00229728.3 | Ints5 Integrator complex subunit 5                                                                     | 2 | 1.866 | 2  |
| 3417 | IPI:IPI00379348.2 | Gm13249 similar to acidic ribosomal phosphoprotein P1                                                  | 2 | 42.98 | 2  |
| 3418 | IPI:IPI00114319.1 | Sod3 Extracellular superoxide dismutase [Cu-Zn]                                                        | 2 | 5.578 | 2  |
| 3419 | IPI:IPI00474167.1 | S1pr1 Putative uncharacterized protein                                                                 | 2 | 4.425 | 1  |
| 3420 | IPI:IPI00876019.3 | Gm2056 hypothetical protein                                                                            | 2 | 6.944 | 1  |
| 3421 | IPI:IPI00554917.4 | Clcn6 MKIAA0046 protein                                                                                | 2 | 1.356 | 1  |
| 3422 | IPI:IPI00113521.5 | Ncs1 Neuronal calcium sensor 1                                                                         | 2 | 8.421 | 3  |
| 3423 | IPI:IPI00118372.1 | Vamp4 Vesicle-associated membrane protein 4                                                            | 2 | 17.02 | 2  |
| 3424 | IPI:IPI00321515.1 | Plcd1 1-phosphatidylinositol-4,5-bisphosphate phosphodiesterase delta-1                                | 2 | 3.439 | 1  |
| 3425 | IPI:IPI00474125.3 | Atl2 Isoform 1 of Atlastin-2                                                                           | 2 | 3.259 | 1  |
| 3426 | IPI:IPI00277399.4 | Cluap1 Clusterin-associated protein 1                                                                  | 2 | 3.39  | 1  |
| 3427 | IPI:IPI00757247.1 | Evl;LOC100047333 ena/VASP-like protein isoform 3                                                       | 2 | 2.506 | 1  |
| 3428 | IPI:IPI00830208.1 | Pacs2 phosphofurin acidic cluster sorting protein 2                                                    | 2 | 1.508 | 1  |

|      |                   |                                                                                      |   |        |   |
|------|-------------------|--------------------------------------------------------------------------------------|---|--------|---|
| 3429 | IPI:IPI00896595.1 | Cars2 probable cysteinyl-tRNA synthetase, mitochondrial                              | 2 | 2.536  | 1 |
| 3430 | IPI:IPI00348414.4 | Ado 2-aminoethanethiol dioxygenase                                                   | 2 | 6.641  | 1 |
| 3431 | IPI:IPI00761756.1 | Ube3a ubiquitin-protein ligase E3A isoform 3                                         | 2 | 1.649  | 1 |
| 3432 | IPI:IPI00969806.1 | Osbp19 Isoform 1 of Oxysterol-binding protein-related protein 9                      | 2 | 1.495  | 1 |
| 3433 | IPI:IPI00396804.2 | Ilkap Isoform 1 of Integrin-linked kinase-associated serine/threonine phosphatase 2C | 2 | 3.061  | 1 |
| 3434 | IPI:IPI00954636.1 | Fam45a hypothetical protein LOC67894 isoform 2                                       | 2 | 5.143  | 1 |
| 3435 | IPI:IPI00420955.5 | Sort1 Isoform 1 of Sortilin                                                          | 2 | 2.788  | 1 |
| 3436 | IPI:IPI00137336.1 | Gpc1 Glypican-1                                                                      | 2 | 3.411  | 1 |
| 3437 | IPI:IPI00751335.1 | Mest Uncharacterized protein                                                         | 2 | 6.533  | 1 |
| 3438 | IPI:IPI00625129.3 | Ftl2 ferritin light chain 2                                                          | 2 | 8.743  | 1 |
| 3439 | IPI:IPI00323465.3 | Amdhd2 Putative N-acetylglucosamine-6-phosphate deacetylase                          | 2 | 5.134  | 1 |
| 3440 | IPI:IPI00230145.5 | Fth1 Ferritin heavy chain                                                            | 2 | 9.89   | 2 |
| 3441 | IPI:IPI00458428.1 | Ssr3 Isoform 2 of Translocon-associated protein subunit gamma                        | 2 | 7.821  | 1 |
| 3442 | IPI:IPI00895516.1 | Tmem201 Transmembrane protein 201                                                    | 2 | 2.296  | 1 |
| 3443 | IPI:IPI00648190.1 | Slc25a35 32 kDa protein                                                              | 2 | 2.703  | 1 |
| 3444 | IPI:IPI00281538.4 | Rab28 Ras-related protein Rab-28                                                     | 2 | 3.167  | 1 |
| 3445 | IPI:IPI00954670.1 | Csdc2 cold shock domain-containing protein C2                                        | 2 | 7.143  | 1 |
| 3446 | IPI:IPI00114944.3 | Fam195b Protein FAM195B                                                              | 2 | 11.34  | 1 |
| 3447 | IPI:IPI00467223.1 | Nckipsd NCK-interacting protein with SH3 domain                                      | 2 | 1.821  | 1 |
| 3448 | IPI:IPI00128245.1 | Cabp4 Calcium-binding protein 4                                                      | 2 | 7.749  | 1 |
| 3449 | IPI:IPI00169923.8 | Tet2 Tet oncogene 2                                                                  | 2 | 0.4685 | 1 |
| 3450 | IPI:IPI00886345.1 | Cdc37l1 Isoform 2 of Hsp90 co-chaperone Cdc37-like 1                                 | 2 | 5.863  | 1 |
| 3451 | IPI:IPI00857740.1 | Blvrb 27 kDa protein                                                                 | 2 | 6.883  | 1 |
| 3452 | IPI:IPI00109639.6 | Exosc8 Exosome complex exonuclease RRP43                                             | 2 | 9.42   | 1 |
| 3453 | IPI:IPI00458011.5 | Gm16500 similar to Scoc protein                                                      | 2 | 11.11  | 1 |
| 3454 | IPI:IPI00410756.2 | 6530401D17Rik;2900062L11Rik Signal peptidase complex subunit 3                       | 2 | 6.111  | 1 |
| 3455 | IPI:IPI00136073.1 | Zfp579 Putative uncharacterized protein (Fragment)                                   | 2 | 4.046  | 1 |
| 3456 | IPI:IPI00880232.1 | Arl6ip4 Uncharacterized protein                                                      | 2 | 8.811  | 1 |
| 3457 | IPI:IPI00317025.3 | Car5b Carbonic anhydrase 5B, mitochondrial                                           | 2 | 5.363  | 1 |
| 3458 | IPI:IPI00113043.1 | Tomm40l Mitochondrial import receptor subunit TOM40B                                 | 2 | 5.195  | 1 |
| 3459 | IPI:IPI00122527.1 | Sgtb Small glutamine-rich tetratricopeptide repeat-containing protein beta           | 2 | 6.579  | 1 |
| 3460 | IPI:IPI00875326.1 | Tomm40 Uncharacterized protein                                                       | 2 | 3.571  | 1 |
| 3461 | IPI:IPI00626741.2 | Phyhd1 Phytanoyl-CoA dioxygenase domain containing 1                                 | 2 | 4.53   | 1 |

|      |                   |                                                                                     |   |       |   |
|------|-------------------|-------------------------------------------------------------------------------------|---|-------|---|
| 3462 | IPI:IPI00134373.1 | Ly6h Putative uncharacterized protein                                               | 2 | 8.543 | 1 |
| 3463 | IPI:IPI00118026.1 | Ap1s1 AP-1 complex subunit sigma-1A                                                 | 2 | 10.13 | 1 |
| 3464 | IPI:IPI00876050.1 | Lsm2 U6 snRNA-associated Sm-like protein LSm2                                       | 2 | 20    | 1 |
| 3465 | IPI:IPI00756696.2 | Ppp4r2 Serine/threonine-protein phosphatase 4 regulatory subunit 2                  | 2 | 3.837 | 1 |
| 3466 | IPI:IPI00319160.6 | Sssca1 Sjogren syndrome/scleroderma autoantigen 1 homolog                           | 2 | 13.57 | 1 |
| 3467 | IPI:IPI00169670.1 | Galm Aldose 1-epimerase                                                             | 2 | 4.971 | 1 |
| 3468 | IPI:IPI00123099.2 | Ap3s2 Putative uncharacterized protein                                              | 2 | 3.968 | 1 |
| 3469 | IPI:IPI00119959.1 | Banf1 Barrier-to-autointegration factor                                             | 2 | 26.97 | 1 |
| 3470 | IPI:IPI00466593.1 | Exosc6 Exosome complex exonuclease MTR3                                             | 2 | 5.495 | 1 |
| 3471 | IPI:IPI00652117.1 | 2610030H06Rik Isoform 2 of Vacuolar ATPase assembly integral membrane protein VMA21 | 2 | 14.46 | 1 |
| 3472 | IPI:IPI00317932.4 | Yif1b Isoform 1 of Protein YIF1B                                                    | 2 | 8.039 | 2 |
| 3473 | IPI:IPI00854941.1 | Nudt4 Diphosphoinositol polyphosphate phosphohydrolase 2                            | 2 | 13.41 | 1 |
| 3474 | IPI:IPI00880407.1 | Ufm1 Protein                                                                        | 2 | 38.46 | 2 |
| 3475 | IPI:IPI00970323.1 | Spcs1 signal peptidase complex subunit 1                                            | 2 | 12.75 | 1 |
| 3476 | IPI:IPI00553596.1 | Sdf2 Sdf2 protein                                                                   | 2 | 7.865 | 1 |
| 3477 | IPI:IPI00132128.1 | Rpa3 Replication protein A 14 kDa subunit                                           | 2 | 14.05 | 2 |
| 3478 | IPI:IPI00126552.3 | Gm4822 similar to small nuclear ribonucleoprotein polypeptide C                     | 2 | 7.547 | 2 |
| 3479 | IPI:IPI00125509.1 | Fxc1 Mitochondrial import inner membrane translocase subunit Tim9 B                 | 2 | 19    | 1 |
| 3480 | IPI:IPI00111050.1 | 2010107G23Rik Uncharacterized protein C10orf35 homolog                              | 2 | 11.67 | 1 |
| 3481 | IPI:IPI00918640.1 | LOC100233175 hypothetical protein<br>LOC100233175 isoform 2                         | 2 | 28    | 1 |
| 3482 | IPI:IPI00857026.1 | Polr2i Uncharacterized protein                                                      | 2 | 27.71 | 1 |
| 3483 | IPI:IPI00855058.1 | Gm5494 exocrine gland-secreting peptide 6 precursor                                 | 2 | 16.91 | 1 |
| 3484 | IPI:IPI00221694.1 | Bola2 Isoform 1 of BolaA-like protein 2                                             | 2 | 22.09 | 1 |
| 3485 | IPI:IPI00132169.1 | Timm8b Mitochondrial import inner membrane translocase subunit Tim8 B               | 2 | 13.25 | 1 |
| 3486 | IPI:IPI00113711.2 | Pip Prolactin-inducible protein homolog                                             | 2 | 10.96 | 1 |
| 3487 | IPI:IPI00405736.3 | Cd81 CD81 antigen                                                                   | 2 | 8.475 | 2 |
| 3488 | IPI:IPI00117503.2 | Polr2f DNA-directed RNA polymerases I, II, and III subunit RPABC2                   | 2 | 5.512 | 1 |
| 3489 | IPI:IPI00312018.6 | Mlec Uncharacterized protein                                                        | 2 | 6.164 | 1 |
| 3490 | IPI:IPI00132765.2 | Tomm6;LOC100047839 Mitochondrial import receptor subunit TOM6 homolog               | 2 | 18.92 | 2 |
| 3491 | IPI:IPI00137694.5 | Hddc2 HD domain-containing protein 2                                                | 2 | 8.543 | 2 |
| 3492 | IPI:IPI00830703.1 | Myeov2 Uncharacterized protein                                                      | 2 | 20    | 1 |
| 3493 | IPI:IPI00113143.1 | 2010107E04Rik 6.8 kDa mitochondrial proteolipid                                     | 2 | 13.79 | 2 |

|      |                   |                                                                        |   |       |    |
|------|-------------------|------------------------------------------------------------------------|---|-------|----|
| 3494 | IPI:IPI00831036.2 | Crygc GammaCins-crystallin splice variant                              | 2 | 70.86 | 78 |
| 3495 | IPI:IPI00620325.2 | Ndr4 Isoform 3 of Protein NDRG4                                        | 2 | 5.446 | 3  |
| 3496 | IPI:IPI00165902.1 | Timm10 Mitochondrial import inner membrane translocase subunit Tim10   | 2 | 7.778 | 1  |
| 3497 | IPI:IPI00114593.1 | Actc1 Actin, alpha cardiac muscle 1                                    | 2 | 71.88 | 67 |
| 3498 | IPI:IPI00470167.3 | Rtn4 reticulon-4 isoform B1                                            | 2 | 59.55 | 24 |
| 3499 | IPI:IPI00896061.1 | Snx16 sorting nexin-16 isoform a                                       | 2 | 6.395 | 2  |
| 3500 | IPI:IPI00378360.2 | Bbs1 Bardet-Biedl syndrome 1                                           | 2 | 3.879 | 3  |
| 3501 | IPI:IPI00625848.2 | Plcb4 Plcb4                                                            | 2 | 1.872 | 3  |
| 3502 | IPI:IPI00556688.1 | Dctn4 Isoform 1 of Dynactin subunit 4                                  | 2 | 4.711 | 2  |
| 3503 | IPI:IPI00753058.3 | Adamts15 Uncharacterized protein                                       | 2 | 3.299 | 3  |
| 3504 | IPI:IPI00137496.1 | Gzmf Granzyme F                                                        | 2 | 8.065 | 1  |
| 3505 | IPI:IPI00230415.5 | Eif2s3x Eukaryotic translation initiation factor 2 subunit 3, X-linked | 2 | 5.297 | 1  |
| 3506 | IPI:IPI00387388.4 | Bag3 BAG family molecular chaperone regulator 3                        | 2 | 2.426 | 1  |
| 3507 | IPI:IPI00885385.1 | Stx1a Uncharacterized protein                                          | 2 | 5.469 | 1  |
| 3508 | IPI:IPI00117214.3 | Hsd12 Hydroxysteroid dehydrogenase-like protein 2                      | 2 | 3.878 | 1  |
| 3509 | IPI:IPI00130235.2 | Hs1bp3 HCLS1-binding protein 3                                         | 2 | 4.293 | 1  |
| 3510 | IPI:IPI00775971.1 | Pitpnm3 Pitpnm3 protein                                                | 2 | 2.544 | 1  |
| 3511 | IPI:IPI00309527.5 | Dffa DNA fragmentation factor subunit alpha isoform a                  | 2 | 4.834 | 1  |
| 3512 | IPI:IPI00857949.2 | Stx16 syntaxin-16 isoform b                                            | 2 | 5.59  | 1  |
| 3513 | IPI:IPI00323251.3 | Gbp2 Interferon-induced guanylate-binding protein 2                    | 2 | 3.226 | 1  |
| 3514 | IPI:IPI00775791.1 | Manf Putative uncharacterized protein                                  | 2 | 9.497 | 1  |
| 3515 | IPI:IPI00272521.3 | Get4 Isoform 1 of Golgi to ER traffic protein 4 homolog                | 2 | 4.587 | 1  |
| 3516 | IPI:IPI00223185.5 | Prkab1 5'-AMP-activated protein kinase subunit beta-1                  | 2 | 6.667 | 1  |
| 3517 | IPI:IPI00416133.1 | Accn1 Isoform 1 of Amiloride-sensitive cation channel 1, neuronal      | 2 | 1.953 | 1  |
| 3518 | IPI:IPI00129754.1 | Podxl Podocalyxin                                                      | 2 | 2.151 | 1  |
| 3519 | IPI:IPI00944741.1 | Cuedc2 CUE domain-containing protein 2 isoform b                       | 2 | 5.128 | 1  |
| 3520 | IPI:IPI00330048.2 | Tomm34 Isoform 2 of Mitochondrial import receptor subunit TOM34        | 2 | 5.825 | 1  |
| 3521 | IPI:IPI00379258.1 | Gm5278 Uncharacterized protein                                         | 2 | 8.743 | 1  |
| 3522 | IPI:IPI00136054.1 | Lsm2 U6 snRNA-associated Sm-like protein LSM2 isoform 1                | 2 | 14.5  | 1  |
| 3523 | IPI:IPI00310916.1 | Cd81 CD81 antigen                                                      | 2 | 8.475 | 1  |
| 3524 | IPI:IPI00928050.1 | Elovl4 elongation of very long chain fatty acids protein 4             | 2 | 2.885 | 1  |
| 3525 | IPI:IPI00467176.2 | Ift46 Intraflagellar transport protein 46 homolog                      | 2 | 4.651 | 1  |

|      |                   |                                                                                      |   |        |    |
|------|-------------------|--------------------------------------------------------------------------------------|---|--------|----|
| 3526 | IPI:IPI00124181.2 | Sephs2 Selenide, water dikinase 2                                                    | 2 | 3.319  | 1  |
| 3527 | IPI:IPI00131895.4 | March5 E3 ubiquitin-protein ligase MARCH5                                            | 2 | 3.237  | 1  |
| 3528 | IPI:IPI00930815.1 | Synj2bp Isoform 4 of Synaptojanin-2-binding protein                                  | 2 | 7.843  | 1  |
| 3529 | IPI:IPI00848868.1 | LOC100046297 similar to ribosomal protein S26                                        | 2 | 7.826  | 1  |
| 3530 | IPI:IPI00122032.4 | Reep2 Receptor expression-enhancing protein 2                                        | 2 | 9.449  | 1  |
| 3531 | IPI:IPI00928108.1 | Nucks1 nuclear ubiquitous casein and cyclin-dependent kinases substrate isoform 2    | 2 | 8.155  | 1  |
| 3532 | IPI:IPI00830531.1 | Folr1 12 kDa protein                                                                 | 2 | 10.58  | 1  |
| 3533 | IPI:IPI00761431.1 | Hmgn1 Putative uncharacterized protein                                               | 2 | 31.25  | 1  |
| 3534 | IPI:IPI00918847.1 | Pkig Protein kinase inhibitor, gamma                                                 | 2 | 28.57  | 1  |
| 3535 | IPI:IPI00312113.1 | Sdhaf2 Isoform 1 of Succinate dehydrogenase assembly factor 2, mitochondrial         | 2 | 7.317  | 1  |
| 3536 | IPI:IPI00347634.2 | Dnaja3 Isoform 1 of DnaJ homolog subfamily A member 3, mitochondrial                 | 2 | 8.125  | 2  |
| 3537 | IPI:IPI00461249.1 | Gm12141 similar to Heat shock protein 1                                              | 2 | 60.56  | 48 |
| 3538 | IPI:IPI00404804.1 | Actg2 Actin, gamma-enteric smooth muscle                                             | 2 | 62.5   | 59 |
| 3539 | IPI:IPI00399958.3 | Calu calumenin isoform 2                                                             | 2 | 31.75  | 8  |
| 3540 | IPI:IPI00116254.1 | Prdx4 Peroxiredoxin-4                                                                | 2 | 11.31  | 6  |
| 3541 | IPI:IPI00222284.4 | Akr1b10 aldo-keto reductase family 1, member B10                                     | 2 | 8.861  | 3  |
| 3542 | IPI:IPI00170316.1 | Mcfcd2 Multiple coagulation factor deficiency protein 2 homolog                      | 2 | 28.28  | 2  |
| 3543 | IPI:IPI00403373.1 | Gldc Putative uncharacterized protein                                                | 2 | 0.9814 | 1  |
| 3544 | IPI:IPI00918179.1 | Slc4a4 Slc4a4 protein                                                                | 2 | 1.589  | 1  |
| 3545 | IPI:IPI00606072.2 | Kbtbd7 kelch repeat and BTB (POZ) domain containing 7                                | 2 | 3.188  | 1  |
| 3546 | IPI:IPI00459033.2 | Dnajc3 DnaJ homolog subfamily C member 3                                             | 2 | 1.984  | 1  |
| 3547 | IPI:IPI00881156.1 | Pigg Uncharacterized protein                                                         | 2 | 2      | 1  |
| 3548 | IPI:IPI00848768.1 | Casc4 Isoform 3 of Protein CASC4                                                     | 2 | 4.913  | 1  |
| 3549 | IPI:IPI00116558.1 | Rhog Rho-related GTP-binding protein RhoG                                            | 2 | 12.57  | 2  |
| 3550 | IPI:IPI00226787.2 | Flad1 Isoform 2 of FAD synthase                                                      | 2 | 2.317  | 1  |
| 3551 | IPI:IPI00885906.1 | Mllt4 Putative uncharacterized protein                                               | 2 | 0.902  | 1  |
| 3552 | IPI:IPI00110351.1 | Lhpp Isoform 1 of Phospholysine phosphohistidine inorganic pyrophosphate phosphatase | 2 | 10.74  | 1  |
| 3553 | IPI:IPI00853897.1 | LOC100046741 similar to red-1                                                        | 2 | 5.379  | 1  |
| 3554 | IPI:IPI00172178.1 | Slc16a14 Monocarboxylate transporter 14                                              | 2 | 2.148  | 1  |
| 3555 | IPI:IPI00222125.1 | Comtd1 Catechol O-methyltransferase domain-containing protein 1                      | 2 | 9.924  | 1  |
| 3556 | IPI:IPI00162949.1 | Cdipt CDP-diacylglycerol--inositol 3-phosphatidyltransferase                         | 2 | 5.164  | 1  |
| 3557 | IPI:IPI00755989.2 | Rps15-ps2 similar to insulinoma protein                                              | 2 | 20.69  | 2  |
| 3558 | IPI:IPI00387549.3 | Gabpa Putative uncharacterized protein                                               | 2 | 2.643  | 1  |
| 3559 | IPI:IPI00170351.2 | Obox3 oocyte specific homeobox 3                                                     | 2 | 5.075  | 2  |

|      |                   |                                                                                  |   |       |     |
|------|-------------------|----------------------------------------------------------------------------------|---|-------|-----|
| 3560 | IPI:IPI00115244.1 | Fgf1 Heparin-binding growth factor 1                                             | 2 | 7.742 | 1   |
| 3561 | IPI:IPI00279079.1 | Fgb Fibrinogen beta chain                                                        | 2 | 3.534 | 1   |
| 3562 | IPI:IPI00320004.2 | Fam84a Protein FAM84A                                                            | 2 | 6.507 | 1   |
| 3563 | IPI:IPI00828495.3 | Rab9 RAB9, member RAS oncogene family                                            | 2 | 6.512 | 1   |
| 3564 | IPI:IPI00118923.2 | Ppp1r11 Protein phosphatase 1 regulatory subunit 11                              | 2 | 12.21 | 1   |
| 3565 | IPI:IPI00119807.1 | Robld3 Mitogen-activated protein-binding protein-interacting protein             | 2 | 14.4  | 1   |
| 3566 | IPI:IPI00343941.3 | Polr2i;LOC100048301 DNA-directed RNA polymerase II subunit RPB9                  | 2 | 18.4  | 1   |
| 3567 | IPI:IPI00124027.1 | A2ld1 Isoform 1 of Gamma-glutamylaminocyclotransferase                           | 2 | 8.725 | 1   |
| 3568 | IPI:IPI00222113.2 | Cd99l2 Isoform 1 of CD99 antigen-like protein 2                                  | 2 | 11.81 | 1   |
| 3569 | IPI:IPI00605904.1 | Gm12888 hypothetical protein LOC545677                                           | 2 | 6.723 | 1   |
| 3570 | IPI:IPI00132224.1 | Rfk Riboflavin kinase                                                            | 2 | 7.097 | 1   |
| 3571 | IPI:IPI00856479.1 | Fxc1;Dnhd1 Uncharacterized protein                                               | 2 | 27.94 | 1   |
| 3572 | IPI:IPI00123176.1 | Gm6316 Glyceraldehyde-3-phosphate dehydrogenase                                  | 2 | 61.36 | 109 |
| 3573 | IPI:IPI00109044.8 | 2900073G15Rik myosin light chain, regulatory B-like                              | 2 | 38.95 | 6   |
| 3574 | IPI:IPI00338854.3 | Gnai3 Guanine nucleotide-binding protein G(k) subunit alpha                      | 2 | 17.51 | 13  |
| 3575 | IPI:IPI00453582.2 | Grsf1 G-rich sequence factor 1                                                   | 2 | 6.681 | 3   |
| 3576 | IPI:IPI00652828.1 | Rsu1 Putative uncharacterized protein                                            | 2 | 9.677 | 2   |
| 3577 | IPI:IPI00875794.1 | Pla2g16 18 kDa protein                                                           | 2 | 11.8  | 2   |
| 3578 | IPI:IPI00604878.3 | Pitpnm3 Isoform 1 of Membrane-associated phosphatidylinositol transfer protein 3 | 2 | 1.335 | 1   |
| 3579 | IPI:IPI00225419.1 | Ptpn6 Isoform 2 of Tyrosine-protein phosphatase non-receptor type 6              | 2 | 2.01  | 1   |
| 3580 | IPI:IPI00116929.1 | Cstf3 Cleavage stimulation factor subunit 3                                      | 2 | 2.232 | 1   |
| 3581 | IPI:IPI00918316.1 | Mcfd2 Uncharacterized protein                                                    | 2 | 29.17 | 1   |
| 3582 | IPI:IPI00622070.1 | Nxn Isoform 2 of Nucleoredoxin                                                   | 2 | 5.627 | 1   |
| 3583 | IPI:IPI00284978.3 | Mrpl9 39S ribosomal protein L9, mitochondrial                                    | 2 | 6.415 | 1   |
| 3584 | IPI:IPI00457815.3 | Usp39 U4/U6.U5 tri-snRNP-associated protein 2                                    | 2 | 3.369 | 1   |
| 3585 | IPI:IPI00554884.1 | Strn Striatin, calmodulin binding protein                                        | 2 | 2.179 | 1   |
| 3586 | IPI:IPI00283689.8 | Fbxo24 F-box only protein 24                                                     | 2 | 1.528 | 1   |
| 3587 | IPI:IPI00261239.6 | Eif2b5 Translation initiation factor eIF-2B subunit epsilon                      | 2 | 1.674 | 1   |
| 3588 | IPI:IPI00129964.1 | Hax1 HCLS1-associated protein X-1                                                | 2 | 4.286 | 1   |
| 3589 | IPI:IPI00462405.1 | Slc9a3r2 Slc9a3r2 protein                                                        | 2 | 4.43  | 1   |
| 3590 | IPI:IPI00137103.3 | Brcc3 Isoform 1 of Lys-63-specific deubiquitinase BRCC36                         | 2 | 5.155 | 1   |
| 3591 | IPI:IPI00757762.1 | LOC100046996 similar to farnesyltransferase alpha subunit                        | 2 | 4.403 | 1   |

|      |                   |                                                                                         |      |        |    |
|------|-------------------|-----------------------------------------------------------------------------------------|------|--------|----|
| 3592 | IPI:IPI00856916.1 | Naaa N-acylethanolamine-hydrolyzing acid amidase isoform 2                              | 2    | 2.222  | 1  |
| 3593 | IPI:IPI00224200.1 | Iws1 Isoform 1 of Protein IWS1 homolog                                                  | 2    | 2.48   | 1  |
| 3594 | IPI:IPI00133593.3 | Gnpda2 Isoform 2 of Glucosamine-6-phosphate isomerase 2                                 | 2    | 4.38   | 1  |
| 3595 | IPI:IPI00649455.1 | Mul1 Isoform 3 of Mitochondrial ubiquitin ligase activator of NFKB 1                    | 2    | 2.305  | 1  |
| 3596 | IPI:IPI00850595.1 | - TCTEX5 isoform 3                                                                      | 2    | 12.7   | 1  |
| 3597 | IPI:IPI00653762.1 | Fgf9 Putative uncharacterized protein                                                   | 2    | 16.35  | 1  |
| 3598 | IPI:IPI00318935.2 | 1810035L17Rik Isoform 1 of SRA stem-loop-interacting RNA-binding protein, mitochondrial | 2    | 25     | 1  |
| 3599 | IPI:IPI00458580.1 | Spg21 Isoform 2 of Maspardin                                                            | 2    | 6.873  | 1  |
| 3600 | IPI:IPI00127176.3 | 6720456B07Rik Probable protein BRICK1                                                   | 2    | 14.67  | 1  |
| 3601 | IPI:IPI00119017.1 | Hagl1 Isoform 1 of Hydroxyacylglutathione hydrolase-like protein                        | 2    | 6.007  | 1  |
| 3602 | IPI:IPI00112278.1 | Triap1 TP53-regulated inhibitor of apoptosis 1                                          | 2    | 18.42  | 1  |
| 3603 | IPI:IPI00406098.2 | Gm9997 hypothetical protein                                                             | 2    | 2.538  | 1  |
| 3604 | IPI:IPI00118948.3 | Gabpa GA-binding protein alpha chain                                                    | 2    | 2.643  | 1  |
| 3605 | IPI:IPI00132932.1 | Mrps12 28S ribosomal protein S12, mitochondrial                                         | 2    | 17.99  | 1  |
| 3606 | IPI:IPI00118666.1 | Rab15 Rab-like protein 5                                                                | 2    | 10.27  | 1  |
| 3607 | IPI:IPI00889976.1 | Fetub Fetuin-B                                                                          | 2    | 2.32   | 1  |
| 3608 | IPI:IPI00416043.5 | Rnase4 ribonuclease 4 precursor                                                         | 2    | 8.784  | 1  |
| 3609 | IPI:IPI00867880.1 | Pcp4l1 Purkinje cell protein 4-like protein 1                                           | 2    | 27.94  | 1  |
| 3610 | IPI:IPI00776005.1 | 2610018G03Rik Novel protein containing a protein kinase domain                          | 1.98 | 3.827  | 1  |
| 3611 | IPI:IPI00227522.2 | 9530053A07Rik Fc fragment of IgG binding protein-like                                   | 1.98 | 0.5424 | 2  |
| 3612 | IPI:IPI00172202.1 | Lsm14a Protein LSM14 homolog A                                                          | 1.98 | 4.978  | 1  |
| 3613 | IPI:IPI00462698.1 | Gm5630 similar to geranylgeranyl diphosphate synthase1                                  | 1.97 | 8.491  | 2  |
| 3614 | IPI:IPI00407509.1 | Ngfr tumor necrosis factor receptor superfamily member 16                               | 1.96 | 5.621  | 1  |
| 3615 | IPI:IPI00119814.3 | Cwc15 Protein CWC15 homolog                                                             | 1.96 | 3.93   | 1  |
| 3616 | IPI:IPI00850789.1 | - TCTEX5 isoform 1                                                                      | 1.96 | 12.7   | 1  |
| 3617 | IPI:IPI00221863.1 | Cggbp1 CGG triplet repeat-binding protein 1                                             | 1.96 | 5.389  | 1  |
| 3618 | IPI:IPI00648558.4 | Dcun1d2 Isoform 1 of DCN1-like protein 2                                                | 1.96 | 6.564  | 1  |
| 3619 | IPI:IPI00407993.3 | 2700094K13Rik Selenoprotein H                                                           | 1.96 | 8.621  | 1  |
| 3620 | IPI:IPI00387494.1 | Hspa2 heat shock-related 70 kDa protein 2                                               | 1.96 | 33.18  | 33 |
| 3621 | IPI:IPI00153840.2 | Cadm4 Cell adhesion molecule 4                                                          | 1.95 | 5.67   | 1  |
| 3622 | IPI:IPI00133215.3 | Ndufb7 NADH dehydrogenase [ubiquinone] 1 beta subcomplex subunit 7                      | 1.94 | 11.68  | 1  |
| 3623 | IPI:IPI00131810.2 | Zfr Zinc finger RNA-binding protein                                                     | 1.93 | 2.98   | 2  |
| 3624 | IPI:IPI00130653.1 | Myh7 Myosin-7                                                                           | 1.93 | 0.8786 | 1  |
| 3625 | IPI:IPI00228616.5 | Hist1h1a Histone H1.1                                                                   | 1.92 | 14.55  | 4  |

|      |                   |                                                                                     |      |        |    |
|------|-------------------|-------------------------------------------------------------------------------------|------|--------|----|
| 3626 | IPI:IPI00463722.1 | Gm1553 Lacrein                                                                      | 1.91 | 9.574  | 1  |
| 3627 | IPI:IPI00331555.2 | Bckdha 2-oxoisovalerate dehydrogenase subunit alpha, mitochondrial                  | 1.89 | 3.587  | 1  |
| 3628 | IPI:IPI00123059.1 | Scg5 Neuroendocrine protein 7B2                                                     | 1.89 | 9.434  | 1  |
| 3629 | IPI:IPI00338904.1 | Ctdp1 Isoform 1 of RNA polymerase II subunit A C-terminal domain phosphatase        | 1.89 | 0.9375 | 1  |
| 3630 | IPI:IPI00267983.5 | 9330129D05Rik acyl-Coenzyme A dehydrogenase family, member 10-like                  | 1.89 | 1.982  | 2  |
| 3631 | IPI:IPI00464104.3 | Tsc22d1 Isoform 3 of TSC22 domain family protein 1                                  | 1.89 | 1.206  | 1  |
| 3632 | IPI:IPI00761429.2 | D030074E01Rik hypothetical protein LOC75964 isoform 1                               | 1.88 | 2.227  | 3  |
| 3633 | IPI:IPI00336362.2 | Aldh1a7 Aldehyde dehydrogenase, cytosolic 1                                         | 1.87 | 20.56  | 16 |
| 3634 | IPI:IPI00471361.3 | Stub1 STIP1 homology and U box-containing protein 1                                 | 1.87 | 8.882  | 2  |
| 3635 | IPI:IPI00623090.3 | Cog7 Conserved oligomeric Golgi complex subunit 7                                   | 1.86 | 2.468  | 2  |
| 3636 | IPI:IPI00895383.1 | Mybpc1 Protein                                                                      | 1.86 | 1.438  | 1  |
| 3637 | IPI:IPI00461416.4 | Zc3h14 Isoform 1 of Zinc finger CCCH domain-containing protein 14                   | 1.86 | 1.769  | 1  |
| 3638 | IPI:IPI00127542.1 | Ube2e1 Ubiquitin-conjugating enzyme E2 E1                                           | 1.85 | 7.772  | 2  |
| 3639 | IPI:IPI00337844.4 | Ranbp2 E3 SUMO-protein ligase RanBP2                                                | 1.85 | 1.441  | 6  |
| 3640 | IPI:IPI00471067.2 | Med28 Mediator of RNA polymerase II transcription subunit 28                        | 1.85 | 7.865  | 1  |
| 3641 | IPI:IPI00406434.5 | Agrn Mini-agrin                                                                     | 1.85 | 1.769  | 1  |
| 3642 | IPI:IPI00674768.3 | Stxbp5 Isoform 1 of Syntaxin-binding protein 5                                      | 1.85 | 1.997  | 1  |
| 3643 | IPI:IPI00831326.1 | Flad1 Isoform 1 of FAD synthase                                                     | 1.85 | 2.439  | 1  |
| 3644 | IPI:IPI00130764.3 | Ppt2 Lysosomal thioesterase PPT2                                                    | 1.84 | 4.636  | 1  |
| 3645 | IPI:IPI00467045.3 | Ube4a ubiquitination factor E4A                                                     | 1.83 | 1.751  | 2  |
| 3646 | IPI:IPI00127264.3 | Klc3 Kinesin light chain 3                                                          | 1.83 | 4.528  | 2  |
| 3647 | IPI:IPI00465597.7 | D030074E01Rik hypothetical protein LOC75964 isoform 2                               | 1.83 | 1.825  | 1  |
| 3648 | IPI:IPI00853900.1 | Celf4 Isoform 1 of CUGBP Elav-like family member 4                                  | 1.83 | 1.646  | 1  |
| 3649 | IPI:IPI00112001.1 | Cap2 Adenylyl cyclase-associated protein 2                                          | 1.82 | 4.832  | 2  |
| 3650 | IPI:IPI00116065.3 | Stk24 Serine/threonine-protein kinase 24                                            | 1.82 | 6.961  | 2  |
| 3651 | IPI:IPI00343550.7 | Gm600 similar to hCG17291                                                           | 1.82 | 2.34   | 1  |
| 3652 | IPI:IPI00117754.1 | Sdf4 Isoform 1 of 45 kDa calcium-binding protein                                    | 1.82 | 5.263  | 1  |
| 3653 | IPI:IPI00649972.1 | Vps25 Vacuolar protein sorting 25                                                   | 1.81 | 11.72  | 1  |
| 3654 | IPI:IPI00885459.1 | Tnik Uncharacterized protein                                                        | 1.81 | 1.183  | 1  |
| 3655 | IPI:IPI00406419.4 | Pepd Xaa-Pro dipeptidase                                                            | 1.8  | 1.623  | 1  |
| 3656 | IPI:IPI00321499.1 | Bcl2l13 Bcl-2-like protein 13                                                       | 1.8  | 9.677  | 2  |
| 3657 | IPI:IPI00469945.3 | Lrrcc1 Isoform 2 of Leucine-rich repeat and coiled-coil domain-containing protein 1 | 1.79 | 0.5941 | 1  |



|      |                   |                                                                                     |      |        |    |
|------|-------------------|-------------------------------------------------------------------------------------|------|--------|----|
| 3658 | IPI:IPI00762823.3 | Zfr2 Uncharacterized protein                                                        | 1.79 | 2.632  | 1  |
| 3659 | IPI:IPI00336248.2 | Pde4dip Isoform 2 of Myomegalin                                                     | 1.79 | 1.521  | 1  |
| 3660 | IPI:IPI00330806.1 | Bsdc1 BSD domain-containing protein 1                                               | 1.79 | 9.133  | 2  |
| 3661 | IPI:IPI00410740.1 | Cars Isoform 2 of CysteinyI-tRNA synthetase, cytoplasmic                            | 1.79 | 2.674  | 2  |
| 3662 | IPI:IPI00674601.1 | Gm6654 predicted gene 6654                                                          | 1.79 | 13.04  | 1  |
| 3663 | IPI:IPI00321922.2 | Pacs1 Phosphofurin acidic cluster sorting protein 1                                 | 1.79 | 1.457  | 1  |
| 3664 | IPI:IPI00648810.1 | Pcyt2 Phosphate cytidyltransferase 2, ethanolamine, isoform CRA_b                   | 1.78 | 4.145  | 1  |
| 3665 | IPI:IPI00556778.2 | Smad4;LOC100048076 MAD homolog 4 (Drosophila), isoform CRA_b                        | 1.78 | 3.811  | 1  |
| 3666 | IPI:IPI00875117.1 | Crmp1 Dihydropyrimidinase-related protein 1                                         | 1.77 | 59.97  | 43 |
| 3667 | IPI:IPI00856739.1 | Eml1 Uncharacterized protein                                                        | 1.77 | 1.574  | 1  |
| 3668 | IPI:IPI00118978.4 | Hcn1 Potassium/sodium hyperpolarization-activated cyclic nucleotide-gated channel 1 | 1.77 | 1.758  | 1  |
| 3669 | IPI:IPI00462651.1 | Commd5 COMM domain-containing protein 5                                             | 1.77 | 7.589  | 1  |
| 3670 | IPI:IPI00828253.1 | Dmd dystrophin                                                                      | 1.77 | 0.7613 | 2  |
| 3671 | IPI:IPI00116038.1 | Cd59a CD59A glycoprotein                                                            | 1.77 | 13.82  | 1  |
| 3672 | IPI:IPI00330406.2 | Ddx23 Uncharacterized protein                                                       | 1.76 | 1.343  | 1  |
| 3673 | IPI:IPI00928367.1 | C2 Complement component 2                                                           | 1.76 | 1.236  | 1  |
| 3674 | IPI:IPI00944079.1 | Rpl3l ribosomal protein L3-like isoform 1                                           | 1.76 | 1.966  | 1  |
| 3675 | IPI:IPI00831094.1 | Cpne1 Copine I                                                                      | 1.75 | 7.583  | 1  |
| 3676 | IPI:IPI00876566.1 | Plch2 Isoform 2 of 1-phosphatidylinositol-4,5-bisphosphate phosphodiesterase eta-2  | 1.75 | 0.8885 | 1  |
| 3677 | IPI:IPI00132682.1 | Pmm1 Phosphomannomutase 1                                                           | 1.74 | 3.435  | 1  |
| 3678 | IPI:IPI00828952.1 | Plaa phospholipase A-2-activating protein                                           | 1.74 | 5.29   | 3  |
| 3679 | IPI:IPI00318645.6 | Ndufa11 NADH dehydrogenase [ubiquinone] 1 alpha subcomplex subunit 11               | 1.74 | 11.19  | 1  |
| 3680 | IPI:IPI00675502.1 | Akap13 Putative uncharacterized protein                                             | 1.74 | 5.263  | 1  |
| 3681 | IPI:IPI00224584.1 | Casq2 Calsequestrin                                                                 | 1.74 | 3.009  | 1  |
| 3682 | IPI:IPI00664808.2 | Kdm3b Isoform 2 of Lysine-specific demethylase 3B                                   | 1.73 | 3.292  | 2  |
| 3683 | IPI:IPI00652964.2 | Sumo3 Isoform 2 of Small ubiquitin-related modifier 3                               | 1.73 | 48.18  | 3  |
| 3684 | IPI:IPI00890345.1 | Wdr47 WD repeat-containing protein 47                                               | 1.73 | 1.413  | 1  |
| 3685 | IPI:IPI00623893.2 | Rpl27-ps1 hypothetical protein isoform 1                                            | 1.73 | 14.71  | 2  |
| 3686 | IPI:IPI00322748.3 | Fbln1 Isoform D of Fibulin-1                                                        | 1.73 | 3.262  | 1  |
| 3687 | IPI:IPI00420344.1 | Rrp12 RRP12-like protein                                                            | 1.72 | 0.5405 | 1  |
| 3688 | IPI:IPI00653323.1 | Rab3gap2 Putative uncharacterized protein                                           | 1.72 | 7.619  | 1  |
| 3689 | IPI:IPI00225661.3 | Pyhin1 Pyrin and HIN domain-containing protein 1                                    | 1.72 | 1.667  | 1  |
| 3690 | IPI:IPI00314640.5 | Abtb1 Ankyrin repeat and BTB/POZ domain-containing protein 1                        | 1.71 | 2.929  | 1  |
| 3691 | IPI:IPI00461298.4 | Rapgef1 Rap guanine nucleotide exchange factor-                                     | 1.7  | 1.662  | 1  |

|      |                   |                                                                                                                                    |      |        |   |
|------|-------------------|------------------------------------------------------------------------------------------------------------------------------------|------|--------|---|
|      |                   | like 1                                                                                                                             |      |        |   |
| 3692 | IPI:IPI00515151.2 | Nipsnap1 Putative uncharacterized protein                                                                                          | 1.7  | 21.32  | 5 |
| 3693 | IPI:IPI00308498.1 | Casp3 Caspase-3                                                                                                                    | 1.7  | 4.332  | 1 |
| 3694 | IPI:IPI00135443.2 | Top2b DNA topoisomerase 2-beta                                                                                                     | 1.68 | 1.799  | 3 |
| 3695 | IPI:IPI00115902.2 | Rpl35a-ps2;Rpl35a;Rpl35a-ps3;Rpl35a-ps6;Rpl35a-ps5;Rpl35a-ps4;LOC100048620;LOC100044516;LOC100046034<br>60S ribosomal protein L35a | 1.68 | 6.364  | 1 |
| 3696 | IPI:IPI00130624.1 | Pld3 Phospholipase D3                                                                                                              | 1.68 | 2.049  | 1 |
| 3697 | IPI:IPI00153101.3 | Tmem109 Transmembrane protein 109                                                                                                  | 1.68 | 4.938  | 1 |
| 3698 | IPI:IPI00467315.4 | Elmod2 ELMO domain-containing protein 2                                                                                            | 1.68 | 3.072  | 1 |
| 3699 | IPI:IPI00928073.1 | Sqstm1 Uncharacterized protein                                                                                                     | 1.68 | 4.712  | 1 |
| 3700 | IPI:IPI00556695.1 | Sltm Isoform 2 of SAFB-like transcription modulator                                                                                | 1.68 | 2.369  | 2 |
| 3701 | IPI:IPI00162769.4 | Mrpl24 39S ribosomal protein L24, mitochondrial                                                                                    | 1.68 | 7.407  | 1 |
| 3702 | IPI:IPI00116105.1 | Serpina6 Corticosteroid-binding globulin                                                                                           | 1.67 | 7.557  | 2 |
| 3703 | IPI:IPI00928163.1 | Cfb complement factor B isoform 1                                                                                                  | 1.67 | 1.573  | 1 |
| 3704 | IPI:IPI00269660.2 | Ylpm1 Putative uncharacterized protein                                                                                             | 1.67 | 1.956  | 1 |
| 3705 | IPI:IPI00396839.1 | Tubgcp3 Gamma-tubulin complex component 3                                                                                          | 1.66 | 2.431  | 1 |
| 3706 | IPI:IPI00317599.3 | Syap1 Synapse-associated protein 1                                                                                                 | 1.66 | 6.027  | 2 |
| 3707 | IPI:IPI00621625.1 | Gm10154 Uncharacterized protein                                                                                                    | 1.66 | 12.82  | 2 |
| 3708 | IPI:IPI00849737.1 | Gm3386;LOC100047065 hypothetical protein isoform 1                                                                                 | 1.66 | 12.86  | 1 |
| 3709 | IPI:IPI00387212.1 | Naa15 N-alpha-acetyltransferase 15, NatA auxiliary subunit                                                                         | 1.64 | 1.272  | 1 |
| 3710 | IPI:IPI00420601.6 | Usp10 Isoform 2 of Ubiquitin carboxyl-terminal hydrolase 10                                                                        | 1.64 | 1.892  | 1 |
| 3711 | IPI:IPI00135048.1 | Vps33a Vacuolar protein sorting-associated protein 33A                                                                             | 1.64 | 1.672  | 1 |
| 3712 | IPI:IPI00923637.1 | 1300001I01Rik Isoform 2 of Protein KIAA0664                                                                                        | 1.64 | 0.978  | 1 |
| 3713 | IPI:IPI00121707.2 | Nudt10;Nudt11 Diphosphoinositol polyphosphate phosphohydrolase 3-alpha                                                             | 1.62 | 12.2   | 1 |
| 3714 | IPI:IPI00894870.1 | Nsun2 Isoform 1 of tRNA (cytosine-5-)-methyltransferase NSUN2                                                                      | 1.62 | 1.321  | 1 |
| 3715 | IPI:IPI00109358.5 | Tmco6 Isoform 1 of Transmembrane and coiled-coil domain-containing protein 6                                                       | 1.62 | 1.619  | 1 |
| 3716 | IPI:IPI00111004.1 | Ggct Gamma-glutamylcyclotransferase                                                                                                | 1.61 | 5.319  | 1 |
| 3717 | IPI:IPI00830834.2 | Homer1 Putative uncharacterized protein                                                                                            | 1.61 | 13.89  | 2 |
| 3718 | IPI:IPI00758039.1 | Gm9138 Uncharacterized protein                                                                                                     | 1.61 | 21.43  | 2 |
| 3719 | IPI:IPI00131988.1 | Mrpl49 39S ribosomal protein L49, mitochondrial                                                                                    | 1.6  | 7.229  | 1 |
| 3720 | IPI:IPI00387318.3 | Tmem30a Cell cycle control protein 50A                                                                                             | 1.6  | 4.67   | 1 |
| 3721 | IPI:IPI00405596.1 | Pgm3 phosphoacetylglucosamine mutase isoform 2                                                                                     | 1.6  | 3.992  | 2 |
| 3722 | IPI:IPI00850690.1 | 4922501C03Rik Protein QN1 homolog                                                                                                  | 1.6  | 0.4989 | 1 |

|      |                   |                                                                                    |      |        |    |
|------|-------------------|------------------------------------------------------------------------------------|------|--------|----|
| 3723 | IPI:IPI00125592.1 | Coq7 Ubiquinone biosynthesis protein COQ7 homolog                                  | 1.59 | 8.295  | 1  |
| 3724 | IPI:IPI00652447.1 | Blvra Putative uncharacterized protein (Fragment)                                  | 1.59 | 5.172  | 1  |
| 3725 | IPI:IPI00338963.3 | Fkbp5 Peptidyl-prolyl cis-trans isomerase FKBP5                                    | 1.58 | 3.289  | 1  |
| 3726 | IPI:IPI00123276.1 | Mosc2 MOSC domain-containing protein 2, mitochondrial                              | 1.58 | 7.101  | 2  |
| 3727 | IPI:IPI00459487.3 | Suclg2 Isoform 1 of Succinyl-CoA ligase [GDP-forming] subunit beta, mitochondrial  | 1.58 | 2.771  | 1  |
| 3728 | IPI:IPI00655073.1 | Yeats2 Isoform 2 of YEATS domain-containing protein 2                              | 1.57 | 0.4598 | 1  |
| 3729 | IPI:IPI00336291.6 | Tecpr1 Isoform 1 of Tectonin beta-propeller repeat-containing protein 1            | 1.57 | 2.573  | 1  |
| 3730 | IPI:IPI00895251.1 | Sec11a Sec11a protein (Fragment)                                                   | 1.57 | 4      | 1  |
| 3731 | IPI:IPI00943435.1 | Thbs3 thrombospondin-3 precursor                                                   | 1.56 | 0.8368 | 1  |
| 3732 | IPI:IPI00163021.2 | Sdsl Serine dehydratase-like                                                       | 1.56 | 6.991  | 1  |
| 3733 | IPI:IPI00944715.1 | Smc1a structural maintenance of chromosomes protein 1A                             | 1.55 | 0.7299 | 1  |
| 3734 | IPI:IPI00317966.6 | Sra1 steroid receptor RNA activator 1 isoform a                                    | 1.55 | 9.052  | 1  |
| 3735 | IPI:IPI00808598.1 | Gtf2f1 General transcription factor IIF, polypeptide 1, isoform CRA_c              | 1.55 | 3.543  | 2  |
| 3736 | IPI:IPI00320716.2 | Rtn4ip1 Reticulon-4-interacting protein 1, mitochondrial                           | 1.54 | 4.798  | 2  |
| 3737 | IPI:IPI00849731.1 | - similar to heterogeneous nuclear ribonucleoprotein A3                            | 1.54 | 54.95  | 47 |
| 3738 | IPI:IPI00274186.8 | Arrb1 Isoform 1A of Beta-arrestin-1                                                | 1.54 | 9.091  | 3  |
| 3739 | IPI:IPI00875350.1 | Ctnnd2 Putative uncharacterized protein                                            | 1.53 | 1.146  | 1  |
| 3740 | IPI:IPI00652802.2 | Agap1 arf-GAP with GTPase, ANK repeat and PH domain-containing protein 1 isoform 2 | 1.52 | 2.363  | 2  |
| 3741 | IPI:IPI00408556.1 | Gm5578 similar to RIKEN cDNA 0610010K06 gene                                       | 1.52 | 4.136  | 3  |
| 3742 | IPI:IPI00515754.1 | Rabep1 Rabaptin, RAB GTPase binding effector protein 1, isoform CRA_a              | 1.52 | 1.946  | 1  |
| 3743 | IPI:IPI00622783.2 | Stk39 STE20/SPS1-related proline-alanine-rich protein kinase                       | 1.52 | 4.676  | 2  |
| 3744 | IPI:IPI00387436.1 | Alkbh7 Isoform 1 of Probable alpha-ketoglutarate-dependent dioxygenase ABH7        | 1.51 | 9.955  | 1  |
| 3745 | IPI:IPI00853800.1 | LOC100048165 similar to Ran-binding protein 16 isoform 3                           | 1.51 | 1.656  | 1  |
| 3746 | IPI:IPI00407242.4 | Rabep2 Isoform 3 of Rab GTPase-binding effector protein 2                          | 1.49 | 4.082  | 2  |
| 3747 | IPI:IPI00458893.2 | Tspan13 Tetraspanin-13                                                             | 1.49 | 3.431  | 1  |
| 3748 | IPI:IPI00755907.1 | Aqr Aquarius                                                                       | 1.48 | 1.214  | 1  |
| 3749 | IPI:IPI00678360.3 | - similar to heterogeneous nuclear ribonucleoprotein A3, isoform 2                 | 1.48 | 46.41  | 37 |
| 3750 | IPI:IPI00136912.1 | Srm Spermidine synthase                                                            | 1.48 | 6.291  | 2  |
| 3751 | IPI:IPI00849457.1 | Gm15365 similar to Translocase of outer                                            | 1.48 | 10.32  | 1  |

|      |                   |                                                                              |      |        |   |
|------|-------------------|------------------------------------------------------------------------------|------|--------|---|
|      |                   | mitochondrial membrane 20 homolog                                            |      |        |   |
| 3752 | IPI:IPI00785299.1 | Atp2b3 Atp2b3 protein                                                        | 1.47 | 3.787  | 6 |
| 3753 | IPI:IPI00115766.2 | Bloc1s1 Biogenesis of lysosome-related organelles complex 1 subunit 1        | 1.47 | 13.6   | 1 |
| 3754 | IPI:IPI00225194.4 | Fam73a Isoform 1 of Protein FAM73A                                           | 1.46 | 2.5    | 1 |
| 3755 | IPI:IPI00762634.1 | Bclaf1 Isoform 3 of Bcl-2-associated transcription factor 1                  | 1.46 | 4.278  | 2 |
| 3756 | IPI:IPI00111877.1 | Ssbp1 Single-stranded DNA-binding protein, mitochondrial                     | 1.46 | 3.947  | 1 |
| 3757 | IPI:IPI00649022.1 | Gaa Glucosidase, alpha, acid                                                 | 1.46 | 6.28   | 1 |
| 3758 | IPI:IPI00133531.1 | Atp5s ATP synthase subunit s, mitochondrial                                  | 1.46 | 4      | 1 |
| 3759 | IPI:IPI00319707.1 | Car12 Carbonic anhydrase 12                                                  | 1.46 | 3.107  | 1 |
| 3760 | IPI:IPI00169752.3 | Lace1 Lactation elevated protein 1                                           | 1.46 | 6.667  | 3 |
| 3761 | IPI:IPI00320878.5 | Rnf121 Isoform 1 of RING finger protein 121                                  | 1.46 | 5.199  | 1 |
| 3762 | IPI:IPI00108557.1 | 4921513D11Rik Putative uncharacterized protein                               | 1.44 | 2.029  | 1 |
| 3763 | IPI:IPI00136140.1 | Rem1 GTP-binding protein REM 1                                               | 1.44 | 5.724  | 2 |
| 3764 | IPI:IPI00553703.2 | Frem2 Isoform 1 of FRAS1-related extracellular matrix protein 2              | 1.44 | 0.443  | 1 |
| 3765 | IPI:IPI00620288.1 | Rpl28-ps3 similar to ribosomal protein L28                                   | 1.44 | 5.109  | 1 |
| 3766 | IPI:IPI00131834.1 | Rwdd4a RWD domain-containing protein 4A                                      | 1.43 | 4.787  | 1 |
| 3767 | IPI:IPI00788403.1 | Abca8b Isoform 2 of ATP-binding cassette sub-family A member 8-B             | 1.43 | 5.263  | 9 |
| 3768 | IPI:IPI00720208.1 | Cpsf7 Isoform 2 of Cleavage and polyadenylation specificity factor subunit 7 | 1.43 | 5.411  | 1 |
| 3769 | IPI:IPI00119140.2 | Mip Lens fiber major intrinsic protein                                       | 1.43 | 3.422  | 1 |
| 3770 | IPI:IPI00848420.1 | Trim56 tripartite motif-containing protein 56                                | 1.43 | 0.9537 | 1 |
| 3771 | IPI:IPI00124389.1 | Chchd4 Mitochondrial intermembrane space import and assembly protein 40      | 1.43 | 6.475  | 1 |
| 3772 | IPI:IPI00875467.1 | Gtf3c1 Putative uncharacterized protein                                      | 1.42 | 0.9476 | 1 |
| 3773 | IPI:IPI00128062.1 | Snx15 Sorting nexin-15                                                       | 1.42 | 8.902  | 1 |
| 3774 | IPI:IPI00124103.1 | Ccs Copper chaperone for superoxide dismutase                                | 1.42 | 4.745  | 1 |
| 3775 | IPI:IPI00845558.1 | 9130011E15Rik Isoform 1 of UPF0668 protein C10orf76 homolog                  | 1.42 | 2.032  | 1 |
| 3776 | IPI:IPI00607972.1 | Fam40a Isoform 4 of Protein FAM40A                                           | 1.41 | 3.376  | 1 |
| 3777 | IPI:IPI00153373.1 | Cmb1 Carboxymethylenebutenolidase homolog                                    | 1.41 | 6.531  | 1 |
| 3778 | IPI:IPI00845556.1 | Mia3 Isoform 2 of Melanoma inhibitory activity protein 3                     | 1.4  | 0.9685 | 1 |
| 3779 | IPI:IPI00848429.1 | LOC100046744 similar to Serine/arginine repetitive matrix protein 2          | 1.39 | 2.31   | 1 |
| 3780 | IPI:IPI00130237.1 | Arih2 E3 ubiquitin-protein ligase ARIH2                                      | 1.39 | 3.252  | 1 |
| 3781 | IPI:IPI00830899.2 | Raf1 Isoform 2 of RAF proto-oncogene serine/threonine-protein kinase         | 1.39 | 2.994  | 1 |
| 3782 | IPI:IPI00894672.1 | Fbxo6 34 kDa protein                                                         | 1.39 | 3.729  | 1 |
| 3783 | IPI:IPI00310293.3 | Bag1 Isoform 1 of BAG family molecular chaperone                             | 1.38 | 7.606  | 2 |

|      |                   |                                                                                    |      |        |   |
|------|-------------------|------------------------------------------------------------------------------------|------|--------|---|
|      |                   | regulator 1                                                                        |      |        |   |
| 3784 | IPI:IPI00751129.1 | Gpsm1 Isoform 5 of G-protein-signaling modulator 1                                 | 1.38 | 1.56   | 1 |
| 3785 | IPI:IPI00876329.2 | Fbrs1 Putative uncharacterized protein                                             | 1.37 | 1.161  | 1 |
| 3786 | IPI:IPI00118235.1 | Mrpl3 39S ribosomal protein L3, mitochondrial                                      | 1.37 | 5.172  | 1 |
| 3787 | IPI:IPI00410836.1 | Fen1 Putative uncharacterized protein                                              | 1.37 | 4.866  | 1 |
| 3788 | IPI:IPI00943405.2 | Mttp Isoform 2 of Microsomal triglyceride transfer protein large subunit           | 1.37 | 0.6601 | 1 |
| 3789 | IPI:IPI00856417.1 | Klc3 Uncharacterized protein                                                       | 1.37 | 1.98   | 1 |
| 3790 | IPI:IPI00458056.3 | Ncbp1 Nuclear cap-binding protein subunit 1                                        | 1.37 | 1.266  | 1 |
| 3791 | IPI:IPI00120166.1 | Slc30a1 Zinc transporter 1                                                         | 1.36 | 4.573  | 1 |
| 3792 | IPI:IPI00890208.1 | Macf1 Isoform 1 of Microtubule-actin cross-linking factor 1                        | 1.36 | 2.315  | 7 |
| 3793 | IPI:IPI00649373.1 | Git1 G protein-coupled receptor kinase-interactor 1                                | 1.36 | 0.9198 | 1 |
| 3794 | IPI:IPI00929787.1 | Tecr trans-2,3-enoyl-CoA reductase isoform 2                                       | 1.35 | 5.802  | 1 |
| 3795 | IPI:IPI00228497.1 | Mmab Isoform 2 of Cob(I)yrinic acid a,c-diamide adenosyltransferase, mitochondrial | 1.34 | 5.447  | 1 |
| 3796 | IPI:IPI00648010.2 | Thoc5 THO complex 5                                                                | 1.34 | 2.014  | 2 |
| 3797 | IPI:IPI00407389.1 | Ogfr Putative uncharacterized protein                                              | 1.33 | 1.961  | 1 |
| 3798 | IPI:IPI00129026.1 | Polr2c DNA-directed RNA polymerase II subunit RPB3                                 | 1.33 | 7.273  | 1 |
| 3799 | IPI:IPI00331707.1 | Hmgcs1;LOC100040592 Hydroxymethylglutaryl-CoA synthase, cytoplasmic                | 1.33 | 1.731  | 1 |
| 3800 | IPI:IPI00473197.1 | Pcsk1n IA4                                                                         | 1.33 | 5.882  | 1 |
| 3801 | IPI:IPI00649859.2 | Tmem67 meckelin                                                                    | 1.32 | 1.106  | 1 |
| 3802 | IPI:IPI00760095.2 | Xpo7 Isoform 2 of Exportin-7                                                       | 1.32 | 1.703  | 1 |
| 3803 | IPI:IPI00652477.1 | Strc Putative uncharacterized protein                                              | 1.32 | 1.547  | 1 |
| 3804 | IPI:IPI00308076.3 | D3Ertd751e Isoform 1 of UPF0462 protein C4orf33 homolog                            | 1.32 | 11.98  | 1 |
| 3805 | IPI:IPI00322595.9 | Tgm4 Protein-glutamine gamma-glutamyltransferase 4                                 | 1.32 | 1.194  | 1 |
| 3806 | IPI:IPI00753155.2 | Drap1 Uncharacterized protein                                                      | 1.31 | 6.79   | 1 |
| 3807 | IPI:IPI00230639.1 | Ogfr Isoform 2 of Opioid growth factor receptor                                    | 1.31 | 1.843  | 1 |
| 3808 | IPI:IPI00117187.1 | Chmp1b Charged multivesicular body protein 1b-1                                    | 1.31 | 3.015  | 1 |
| 3809 | IPI:IPI00656204.1 | Nckap1 Isoform 2 of Nck-associated protein 1                                       | 1.3  | 1.35   | 1 |
| 3810 | IPI:IPI00895985.1 | Trim25 Tripartite motif protein 25                                                 | 1.3  | 4.91   | 1 |
| 3811 | IPI:IPI00848600.1 | LOC100047480 similar to RIKEN cDNA 2610528K11 gene                                 | 1.3  | 1.513  | 1 |
| 3812 | IPI:IPI00265217.4 | Rcor1 REST corepressor 1                                                           | 1.29 | 3.927  | 1 |
| 3813 | IPI:IPI00944057.1 | Tars2 threonyl-tRNA synthetase, mitochondrial isoform 3                            | 1.29 | 3.115  | 2 |
| 3814 | IPI:IPI00111388.3 | Arr3 Arrestin-C                                                                    | 1.29 | 8.136  | 2 |
| 3815 | IPI:IPI00127903.1 | BC016201;Cngb1 cDNA sequence BC016201                                              | 1.28 | 20.25  | 8 |

|      |                   |                                                                                              |      |        |   |
|------|-------------------|----------------------------------------------------------------------------------------------|------|--------|---|
| 3816 | IPI:IPI00109805.1 | 2310045N01Rik UPF0402 protein                                                                | 1.28 | 5.833  | 1 |
| 3817 | IPI:IPI00757931.1 | Gm7122 similar to ATPase, H <sup>+</sup> transporting, lysosomal accessory protein 2         | 1.28 | 12.38  | 2 |
| 3818 | IPI:IPI00331244.4 | Ccdc22 Coiled-coil domain-containing protein 22                                              | 1.28 | 1.116  | 1 |
| 3819 | IPI:IPI00930824.1 | Folh1 glutamate carboxypeptidase 2 isoform 2                                                 | 1.27 | 3.338  | 2 |
| 3820 | IPI:IPI00785267.1 | Man2b1 lysosomal alpha-mannosidase precursor                                                 | 1.27 | 1.382  | 1 |
| 3821 | IPI:IPI00844720.1 | Magi1 membrane-associated guanylate kinase, WW and PDZ domain-containing protein 1 isoform b | 1.27 | 0.4781 | 1 |
| 3822 | IPI:IPI00881016.1 | Hint3 19 kDa protein                                                                         | 1.26 | 10.98  | 1 |
| 3823 | IPI:IPI00114819.3 | Wdr77 Methylosome protein 50                                                                 | 1.25 | 2.047  | 1 |
| 3824 | IPI:IPI00753603.1 | Mpdz Multiple PDZ domain protein                                                             | 1.25 | 9.42   | 1 |
| 3825 | IPI:IPI00355248.5 | mt-Co1 cytochrome c oxidase subunit I                                                        | 1.24 | 4.086  | 3 |
| 3826 | IPI:IPI00970477.1 | Ag1 Protein                                                                                  | 1.24 | 1.446  | 1 |
| 3827 | IPI:IPI00133528.1 | Golph3 Isoform 1 of Golgi phosphoprotein 3                                                   | 1.24 | 6.376  | 1 |
| 3828 | IPI:IPI00956970.1 | Abi2 Abi2 protein                                                                            | 1.24 | 2.708  | 1 |
| 3829 | IPI:IPI00853687.1 | Celf4 Isoform 2 of CUGBP Elav-like family member 4                                           | 1.23 | 1.653  | 1 |
| 3830 | IPI:IPI00470086.1 | Aars2 Probable alanyl-tRNA synthetase, mitochondrial                                         | 1.23 | 2.143  | 2 |
| 3831 | IPI:IPI00761666.2 | Vps13c Isoform 2 of Vacuolar protein sorting-associated protein 13C                          | 1.23 | 1.242  | 5 |
| 3832 | IPI:IPI00108998.1 | Slc25a27 Uncoupling protein 4                                                                | 1.23 | 2.484  | 1 |
| 3833 | IPI:IPI00227808.3 | Cdv3 Isoform 1 of Protein CDV3                                                               | 1.22 | 2.847  | 1 |
| 3834 | IPI:IPI00605489.3 | Otud7b zinc finger, A20 domain containing 1                                                  | 1.22 | 1.786  | 1 |
| 3835 | IPI:IPI00467582.3 | Mylk Isoform 3 of Myosin light chain kinase, smooth muscle                                   | 1.22 | 1.261  | 1 |
| 3836 | IPI:IPI00754414.1 | LOC100045576 similar to Cerebral cavernous malformation 2 homolog                            | 1.22 | 1.878  | 1 |
| 3837 | IPI:IPI00124568.3 | Exd2 exonuclease 3'-5' domain-containing protein 2                                           | 1.21 | 1.692  | 2 |
| 3838 | IPI:IPI00331128.3 | Rab8a Ras-related protein Rab-8A                                                             | 1.2  | 22.22  | 5 |
| 3839 | IPI:IPI00132448.1 | Mrps17 28S ribosomal protein S17, mitochondrial                                              | 1.19 | 11.67  | 2 |
| 3840 | IPI:IPI00850740.1 | LOC100044138 similar to CDCrel-1A1 isoform 2                                                 | 1.19 | 5.026  | 1 |
| 3841 | IPI:IPI00648472.1 | Epn2 Epsin 2                                                                                 | 1.19 | 1.733  | 1 |
| 3842 | IPI:IPI00555130.2 | Rab3gap2 rab3 GTPase-activating protein non-catalytic subunit                                | 1.19 | 0.5768 | 1 |
| 3843 | IPI:IPI00420658.3 | Atp8b1 Probable phospholipid-transporting ATPase IC                                          | 1.19 | 0.7994 | 1 |
| 3844 | IPI:IPI00831295.1 | 1500002020Rik Isoform 1 of Protein SMG9                                                      | 1.19 | 3.846  | 1 |
| 3845 | IPI:IPI00400192.1 | Pum2 Isoform 3 of Pumilio homolog 2                                                          | 1.18 | 1.83   | 1 |
| 3846 | IPI:IPI00957016.2 | AI607873 similar to interferon activated gene 204                                            | 1.18 | 1.227  | 2 |
| 3847 | IPI:IPI00120233.1 | Gcdh Glutaryl-CoA dehydrogenase, mitochondrial                                               | 1.18 | 5.251  | 1 |
| 3848 | IPI:IPI00331084.5 | Zim1 zinc finger, imprinted 1                                                                | 1.17 | 1.209  | 1 |

|      |                   |                                                                                                  |      |        |   |
|------|-------------------|--------------------------------------------------------------------------------------------------|------|--------|---|
| 3849 | IPI:IPI00228319.2 | Rnf170 Isoform 1 of RING finger protein 170                                                      | 1.17 | 5.594  | 3 |
| 3850 | IPI:IPI00136170.1 | Alox8 Arachidonate 15-lipoxygenase B                                                             | 1.17 | 0.8863 | 1 |
| 3851 | IPI:IPI00355808.4 | Asap2 Isoform 1 of Arf-GAP with SH3 domain, ANK repeat and PH domain-containing protein 2        | 1.16 | 2.088  | 1 |
| 3852 | IPI:IPI00170394.1 | Rbm17 Splicing factor 45                                                                         | 1.15 | 7.654  | 3 |
| 3853 | IPI:IPI00869395.1 | Rttm Isoform 2 of Rotatin                                                                        | 1.15 | 1.163  | 1 |
| 3854 | IPI:IPI00830799.2 | Kcnq5 potassium voltage-gated channel subfamily KQT member 5 isoform 1                           | 1.15 | 1.471  | 2 |
| 3855 | IPI:IPI00353923.3 | Gm10043 Uncharacterized protein                                                                  | 1.15 | 9.615  | 1 |
| 3856 | IPI:IPI00330333.3 | Ankrd13a Ankyrin repeat domain-containing protein 13A                                            | 1.14 | 2.721  | 1 |
| 3857 | IPI:IPI00225066.8 | Rpl36a1;Rpl36a;Rpl36a-ps2;LOC100048339 60S ribosomal protein L36a                                | 1.14 | 5.66   | 1 |
| 3858 | IPI:IPI00133750.1 | Mrpl53 39S ribosomal protein L53, mitochondrial                                                  | 1.14 | 15.25  | 1 |
| 3859 | IPI:IPI00131954.1 | D17Wsu104e UPF0556 protein C19orf10 homolog                                                      | 1.14 | 9.036  | 1 |
| 3860 | IPI:IPI00876528.1 | Gtf2i Isoform 5 of General transcription factor II-I                                             | 1.13 | 2.023  | 2 |
| 3861 | IPI:IPI00117106.3 | 1700052N19Rik Isoform 1 of UPF0364 protein C6orf211 homolog                                      | 1.13 | 2.278  | 1 |
| 3862 | IPI:IPI00460103.1 | Gm10086 Uncharacterized protein                                                                  | 1.13 | 5.983  | 1 |
| 3863 | IPI:IPI00330695.5 | Fam129b Niban-like protein 1                                                                     | 1.12 | 0.9346 | 1 |
| 3864 | IPI:IPI00129304.8 | Colec12 Collectin-12                                                                             | 1.12 | 0.9434 | 1 |
| 3865 | IPI:IPI00169713.1 | 2310061C15Rik Uncharacterized protein C16orf61 homolog                                           | 1.12 | 12.66  | 1 |
| 3866 | IPI:IPI00895186.1 | Aspa Aspartoacylase (Aminoacylase) 2, isoform CRA_b                                              | 1.11 | 3.526  | 1 |
| 3867 | IPI:IPI00319111.3 | Sdhc Succinate dehydrogenase cytochrome b560 subunit, mitochondrial                              | 1.1  | 4.734  | 1 |
| 3868 | IPI:IPI00659820.3 | Qrs1l Glutamyl-tRNA(Gln) amidotransferase subunit A homolog                                      | 1.1  | 3.048  | 1 |
| 3869 | IPI:IPI00855003.1 | Dkc1 Dyskeratosis congenita 1, dyskerin homolog                                                  | 1.1  | 9.655  | 1 |
| 3870 | IPI:IPI00380780.7 | Ikbkap Elongator complex protein 1                                                               | 1.09 | 2.176  | 3 |
| 3871 | IPI:IPI00856808.1 | Shq1 Isoform 1 of Protein SHQ1 homolog                                                           | 1.09 | 1.23   | 1 |
| 3872 | IPI:IPI00308993.3 | Prf1 Perforin-1                                                                                  | 1.09 | 1.986  | 1 |
| 3873 | IPI:IPI00395134.4 | Homer1 Isoform 1 of Homer protein homolog 1                                                      | 1.09 | 2.732  | 1 |
| 3874 | IPI:IPI00133588.5 | 2010012O05Rik UPF0693 protein C10orf32 homolog                                                   | 1.09 | 16.19  | 1 |
| 3875 | IPI:IPI00271059.2 | Rab4b Ras-related protein Rab-4B                                                                 | 1.07 | 14.55  | 3 |
| 3876 | IPI:IPI00380945.3 | 2610021K21Rik Isoform 1 of EF-hand domain-containing protein C14orf143 homolog                   | 1.07 | 4.321  | 1 |
| 3877 | IPI:IPI00399498.2 | Nav1 Isoform 2 of Neuron navigator 1                                                             | 1.07 | 1.433  | 2 |
| 3878 | IPI:IPI00321074.3 | Vasn Vasorin                                                                                     | 1.07 | 1.783  | 1 |
| 3879 | IPI:IPI00621806.2 | Camk2a Isoform Alpha CaMKII of Calcium/calmodulin-dependent protein kinase type II subunit alpha | 1.06 | 16.95  | 8 |

|      |                   |                                                       |      |        |   |
|------|-------------------|-------------------------------------------------------|------|--------|---|
| 3880 | IPI:IPI00128776.1 | Sorcs3 VPS10 domain-containing receptor SorCS3        | 1.06 | 0.8203 | 1 |
| 3881 | IPI:IPI00857275.1 | 1700028K03Rik hypothetical protein LOC76421 isoform 2 | 1.06 | 6.215  | 1 |
| 3882 | IPI:IPI00133640.1 | 7420416P09Rik hypothetical protein LOC432677          | 1.04 | 2.703  | 1 |
