# Supplementary material
Source: PubMed Central journal article supplement (PMC4227558)
Supplement: pr500558y_si_003.pdf [file pr500558y_si_003.pdf]

Supplemental Table 3A. iTRAQ ratios for a list of 30 retina proteins which were up-regulated in myopic eyes as compared to control eyes. Thirteen retina proteins (yellow highlighted) responded to atropine treatment (see also Figure 5A).

| N  | Accession #        | Protein Name                                                                                          | iTRAQ Ratio (Myopia vs Control) Mean $\pm$ SD | iTRAQ Ratio (Treat vs Control) Mean $\pm$ SD |
|----|--------------------|-------------------------------------------------------------------------------------------------------|-----------------------------------------------|----------------------------------------------|
| 1  | IPI:IPI00113143.1  | Gene_Symbol=2010107E04Rik 6.8 kDa mitochondrial proteolipid                                           | 2.34 $\pm$ 1.45                               | 1.06 $\pm$ NA                                |
| 2  | IPI:IPI00122048.2  | Gene_Symbol=Atp1a3 Sodium/potassium-transporting ATPase subunit alpha-3                               | 2.18 $\pm$ 0.07                               | 0.45 $\pm$ 0.38                              |
| 3  | IPI:IPI00313475.1  | Gene_Symbol=Atp5c1 ATP synthase subunit gamma, mitochondrial                                          | 1.77 $\pm$ 0.12                               | 1.17 $\pm$ NA                                |
| 4  | IPI:IPI00670114.1  | Gene_Symbol=Cadps Isoform 4 of Calcium-dependent secretion activator 1                                | 2.22 $\pm$ 0.87                               | 0.91 $\pm$ 0.46                              |
| 5  | IPI:IPI00169916.11 | Gene_Symbol=Cltc Clathrin heavy chain 1                                                               | 2.82 $\pm$ 0.19                               | 0.72 $\pm$ 0.06                              |
| 6  | IPI:IPI00125899.1  | Gene_Symbol=Ctnnb1 Catenin beta-1                                                                     | 2.54 $\pm$ 0.06                               | 2.56 $\pm$ 0.7                               |
| 7  | IPI:IPI00653307.1  | Gene_Symbol=Ddx17 probable ATP-dependent RNA helicase DDX17 isoform 1                                 | 2.33 $\pm$ 1.3                                | 0.93 $\pm$ NA                                |
| 8  | IPI:IPI00420363.2  | Gene_Symbol=Ddx5 Probable ATP-dependent RNA helicase DDX5                                             | 2.08 $\pm$ 0.47                               | NA $\pm$ NA                                  |
| 9  | IPI:IPI00339468.4  | Gene_Symbol=Dhx9 Isoform 2 of ATP-dependent RNA helicase A                                            | 2.07 $\pm$ 0.28                               | 1.07 $\pm$ NA                                |
| 10 | IPI:IPI00119876.1  | Gene_Symbol=Dync1h1 Cytoplasmic dynein 1 heavy chain 1                                                | 2.25 $\pm$ 0.37                               | 1.48 $\pm$ 0.14                              |
| 11 | IPI:IPI00116804.1  | Gene_Symbol=Eif2b2 Translation initiation factor eIF-2B subunit beta                                  | 3.13 $\pm$ 3.26                               | 2.86 $\pm$ 2.88                              |
| 12 | IPI:IPI00462873.3  | Gene_Symbol=Epb4.1 Isoform 2 of Protein 4.1                                                           | 1.79 $\pm$ 0.40                               | 0.56 $\pm$ 0.30                              |
| 13 | IPI:IPI00330289.3  | Gene_Symbol=Epb4.1l2 band 4.1-like protein 2                                                          | 1.94 $\pm$ 0.57                               | 0.56 $\pm$ 0.15                              |
| 14 | IPI:IPI00230264.5  | Gene_Symbol=H2afx Histone H2A.x                                                                       | 1.77 $\pm$ 0.04                               | 3.43 $\pm$ 5.64                              |
| 15 | IPI:IPI00828488.1  | Gene_Symbol=Hnrnpa2b1 Isoform 1 of Heterogeneous nuclear ribonucleoproteins A2/B1                     | 2.01 $\pm$ 0.22                               | 0.53 $\pm$ 0.28                              |
| 16 | IPI:IPI00226073.2  | Gene_Symbol=Hnrnpf Isoform 1 of Heterogeneous nuclear ribonucleoprotein F                             | 1.89 $\pm$ 0.64                               | NA $\pm$ NA                                  |
| 17 | IPI:IPI00132443.3  | Gene_Symbol=Hnrnmp Isoform 1 of Heterogeneous nuclear ribonucleoprotein M                             | 2.38 $\pm$ 0.22                               | 0.83 $\pm$ 0.02                              |
| 18 | IPI:IPI00480357.6  | Gene_Symbol=Hnrnmp Isoform 2 of Heterogeneous nuclear ribonucleoprotein M                             | 2.07 $\pm$ 0.03                               | 1.19 $\pm$ 0.13                              |
| 19 | IPI:IPI00458583.3  | Gene_Symbol=Hnrnpu Heterogeneous nuclear ribonucleoprotein U                                          | 2.45 $\pm$ 0.06                               | 1.47 $\pm$ 1.5                               |
| 20 | IPI:IPI00776384.1  | Gene_Symbol=Ilf3 Nuclear factor 90                                                                    | 2.04 $\pm$ 0.28                               | 1 $\pm$ 0.22                                 |
| 21 | IPI:IPI00751369.1  | Gene_Symbol=Ldha L-lactate dehydrogenase A chain isoform 2                                            | 2.1 $\pm$ 0.11                                | 0.3 $\pm$ 0.10                               |
| 22 | IPI:IPI00226891.1  | Gene_Symbol=Myef2 Isoform 1 of Myelin expression factor 2                                             | 2.15 $\pm$ 0.45                               | 0.78 $\pm$ 0.07                              |
| 23 | IPI:IPI00656325.2  | Gene_Symbol=Nsf Vesicle-fusing ATPase                                                                 | 2.13 $\pm$ 0.93                               | 0.51 $\pm$ 0.07                              |
| 24 | IPI:IPI00310091.8  | Gene_Symbol=Ppp2r1a Serine/threonine-protein phosphatase 2A 65 kDa regulatory subunit A alpha isoform | 1.70 $\pm$ 0.24                               | 0.74 $\pm$ NA                                |
| 25 | IPI:IPI00114667.1  | Gene_Symbol=Psmc7 26S proteasome non-ATPase regulatory subunit 7                                      | 1.90 $\pm$ 0.64                               | 1.54 $\pm$ 0.27                              |
| 26 | IPI:IPI00111412.3  | Gene_Symbol=Rpl4 60S ribosomal protein L4                                                             | 1.91 $\pm$ 0.67                               | 0.87 $\pm$ 0.34                              |
| 27 | IPI:IPI00227928.3  | Gene_Symbol=Slc6a1 Sodium- and chloride-dependent GABA transporter 1                                  | 1.99 $\pm$ 0.42                               | 0.69 $\pm$ 0.35                              |

|    |                   |                                                            |           |           |
|----|-------------------|------------------------------------------------------------|-----------|-----------|
| 28 | IPI:IPI00415402.3 | Gene_Symbol=Stxbp1 Isoform 1 of Syntaxin-binding protein 1 | 1.91±0.00 | 0.32±0.14 |
| 29 | IPI:IPI00117352.1 | Gene_Symbol=Tubb5 Tubulin beta-5 chain                     | 2.20±1.11 | NA±NA     |
| 30 | IPI:IPI00130264.1 | Gene_Symbol=Uckl1 Uridine-cytidine kinase-like 1           | 1.72±0.09 | 2.01±NA   |

Supplemental Table 3B. iTRAQ ratios for a list of 28 retina proteins which were down-regulated in myopic eyes as compared to control eyes. Ten retina proteins (yellow highlighted) responded to atropine treatment (see also Figure 5B).

| N  | Accession #       | Protein Name                                                                                  | iTRAQ Ratio (Myopia vs Control) Mean $\pm$ SD | iTRAQ Ratio (Treat vs Control) Mean $\pm$ SD |
|----|-------------------|-----------------------------------------------------------------------------------------------|-----------------------------------------------|----------------------------------------------|
| 1  | IPI:IPI00955362.1 | Gene_Symbol=Abpe androgen binding protein epsilon precursor                                   | 0.47 $\pm$ 0.09                               | 0.98 $\pm$ 0.66                              |
| 2  | IPI:IPI00134961.1 | Gene_Symbol=Acadm Medium-chain specific acyl-CoA dehydrogenase, mitochondrial                 | 0.57 $\pm$ 0.01                               | 1.01 $\pm$ 0.08                              |
| 3  | IPI:IPI00553798.2 | Gene_Symbol=Ahnak AHNAK nucleoprotein isoform 1                                               | 0.24 $\pm$ 0.42                               | 3.06 $\pm$ 5.99                              |
| 4  | IPI:IPI00317309.5 | Gene_Symbol=Anxa5 Annexin A5                                                                  | 0.62 $\pm$ 0.09                               | 3.03 $\pm$ 1.37                              |
| 5  | IPI:IPI00554894.2 | Gene_Symbol=Anxa6 Annexin A6                                                                  | 0.51 $\pm$ 0.21                               | 2 $\pm$ 0.47                                 |
| 6  | IPI:IPI00120076.2 | Gene_Symbol=Ckmt2 Creatine kinase S-type, mitochondrial                                       | 0.22 $\pm$ 0.15                               | 2.59 $\pm$ 0.5                               |
| 7  | IPI:IPI00785410.1 | Gene_Symbol=Cox5b Cytochrome c oxidase subunit 5B, mitochondrial                              | 0.57 $\pm$ 0.14                               | 0.86 $\pm$ 0.25                              |
| 8  | IPI:IPI00331692.1 | Gene_Symbol=Dci 3,2-trans-enoyl-CoA isomerase, mitochondrial precursor                        | 0.3 $\pm$ 0.08                                | 1.37 $\pm$ 0.79                              |
| 9  | IPI:IPI00120187.3 | Gene_Symbol=Fmod Fibromodulin                                                                 | 0.59 $\pm$ 0.11                               | 0.87 $\pm$ 0.35                              |
| 10 | IPI:IPI00379634.2 | Gene_Symbol=Gm5325 Uncharacterized protein                                                    | 0.4 $\pm$ 0.08                                | 0.5 $\pm$ 0.48                               |
| 11 | IPI:IPI00875986.1 | Gene_Symbol=Gm5326;Gm6662 Androgen-binding protein (Fragment)                                 | 0.42 $\pm$ 0.01                               | 1.47 $\pm$ NA                                |
| 12 | IPI:IPI00970097.1 | Gene_Symbol=Gpd1 Uncharacterized protein                                                      | 0.32 $\pm$ 0.36                               | 4.74 $\pm$ NA                                |
| 13 | IPI:IPI00890906.1 | Gene_Symbol=Gpmb transmembrane glycoprotein NMB precursor                                     | 0.49 $\pm$ 0.24                               | 0.97 $\pm$ 1.6                               |
| 14 | IPI:IPI00555023.2 | Gene_Symbol=Gstp1 Glutathione S-transferase P 1                                               | 0.55 $\pm$ 0.16                               | 0.96 $\pm$ 0.25                              |
| 15 | IPI:IPI00318614.9 | Gene_Symbol=Idh2 Isocitrate dehydrogenase [NADP], mitochondrial                               | 0.59 $\pm$ 0.06                               | 1.25 $\pm$ 0.62                              |
| 16 | IPI:IPI00230394.5 | Gene_Symbol=Lmnb1 Lamin-B1                                                                    | 0.35 $\pm$ 0.21                               | 1.85 $\pm$ 1.22                              |
| 17 | IPI:IPI00223377.1 | Gene_Symbol=Mbp Isoform 4 of Myelin basic protein                                             | 0.32 $\pm$ 0.36                               | 13.55 $\pm$ 23.47                            |
| 18 | IPI:IPI00896700.1 | Gene_Symbol=Mtap1b microtubule-associated protein 1B                                          | 0.48 $\pm$ 0.14                               | 0.83 $\pm$ 0.06                              |
| 19 | IPI:IPI00128345.2 | Gene_Symbol=Ndufs6 NADH dehydrogenase [ubiquinone] iron-sulfur protein 6, mitochondrial       | 0.39 $\pm$ 0.25                               | 1.61 $\pm$ NA                                |
| 20 | IPI:IPI00169925.2 | Gene_Symbol=Ndufv2 Isoform 1 of NADH dehydrogenase [ubiquinone] flavoprotein 2, mitochondrial | 0.53 $\pm$ 0.04                               | 1.63 $\pm$ 0.93                              |
| 21 | IPI:IPI00321860.1 | Gene_Symbol=Pdcl Phosducin-like protein                                                       | 0.47 $\pm$ 0.2                                | 0.84 $\pm$ 0.55                              |
| 22 | IPI:IPI00230706.5 | Gene_Symbol=Pgam2 Phosphoglycerate mutase 2                                                   | 0.19 $\pm$ 0.2                                | 2.34 $\pm$ 1.34                              |
| 23 | IPI:IPI00118757.1 | Gene_Symbol=Phpt1 14 kDa phosphohistidine phosphatase                                         | 0.51 $\pm$ 0.01                               | 0.42 $\pm$ 0.16                              |
| 24 | IPI:IPI00222555.5 | Gene_Symbol=S100a10 Protein S100-A10                                                          | 0.36 $\pm$ 0.31                               | 2.15 $\pm$ 3.9                               |
| 25 | IPI:IPI00229940.4 | Gene_Symbol=Sag S-arrestin                                                                    | 0.51 $\pm$ 0.05                               | 0.25 $\pm$ 0.08                              |
| 26 | IPI:IPI00230044.5 | Gene_Symbol=Tpm3 Isoform 2 of Tropomyosin alpha-3 chain                                       | 0.58 $\pm$ 0.08                               | 0.79 $\pm$ 0.42                              |
| 27 | IPI:IPI00350590.6 | Gene_Symbol=Txnrd2 Uncharacterized protein                                                    | 0.56 $\pm$ 0.05                               | 0.98 $\pm$ 0.26                              |
| 28 | IPI:IPI00555000.2 | Gene_Symbol=Uqcrb Cytochrome b-c1 complex subunit 7                                           | 0.41 $\pm$ 0.16                               | 1.02 $\pm$ 0.19                              |

Supplemental Table 3C. iTRAQ ratios for a list of retina proteins which were found to be no significant changes in myopic eyes as compared to control eyes, but showed either up-regulation (n =2) or down-regulation (n = 17) after atropine treatment (see also Figure 5C and 5D).

| N                                                                             | Accession #        | Protein Name                                                                          | iTRAQ Ratio (Myopia vs Control) Mean $\pm$ SD | iTRAQ Ratio (Treat vs Control) Mean $\pm$ SD |
|-------------------------------------------------------------------------------|--------------------|---------------------------------------------------------------------------------------|-----------------------------------------------|----------------------------------------------|
| <b>Myopic vs control: no change, after atropine treatment: down-regulated</b> |                    |                                                                                       |                                               |                                              |
| 1                                                                             | IPI:IPI00407692.3  | Gene_Symbol=Atp6v1a Isoform 1 of V-type proton ATPase catalytic subunit A             | 1.26 $\pm$ 0.43                               | 0.36 $\pm$ 0.13                              |
| 2                                                                             | IPI:IPI00116281.3  | Gene_Symbol=Cct6a T-complex protein 1 subunit zeta                                    | 1.06 $\pm$ 0.16                               | 0.52 $\pm$ 0.01                              |
| 3                                                                             | IPI:IPI00408176.2  | Gene_Symbol=Csnk2a1;Gm10031 casein kinase II subunit alpha                            | 1.22 $\pm$ 0.08                               | 0.57 $\pm$ 0.03                              |
| 4                                                                             | IPI:IPI00830623.1  | Gene_Symbol=Fus 53 kDa protein                                                        | 1.21 $\pm$ 0.54                               | 0.56 $\pm$ 0.02                              |
| 5                                                                             | IPI:IPI00120716.3  | Gene_Symbol=Gnb1 Guanine nucleotide-binding protein G(I)/G(S)/G(T) subunit beta-1     | 1.14 $\pm$ 0.4                                | 0.26 $\pm$ 0.18                              |
| 6                                                                             | IPI:IPI00762858.1  | Gene_Symbol=Hk1 hexokinase-1 isoform HK1                                              | 0.9 $\pm$ 0.23                                | 0.42 $\pm$ 0.04                              |
| 7                                                                             | IPI:IPI00553777.2  | Gene_Symbol=Hnrnpa1 Putative uncharacterized protein                                  | 1.39 $\pm$ 0.24                               | 0.38 $\pm$ 0.01                              |
| 8                                                                             | IPI:IPI00336874.1  | Gene_Symbol=Hnrnpd Isoform 4 of Heterogeneous nuclear ribonucleoprotein D0            | 1.24 $\pm$ 0.13                               | 0.39 $\pm$ 0.02                              |
| 9                                                                             | IPI:IPI00330804.4  | Gene_Symbol=Hsp90aa1 Heat shock protein HSP 90-alpha                                  | 1.47 $\pm$ 0.14                               | 0.31 $\pm$ 0.01                              |
| 10                                                                            | IPI:IPI00970385.1  | Gene_Symbol=Impdh1 61 kDa protein                                                     | 0.97 $\pm$ 0.12                               | 0.47 $\pm$ 0.01                              |
| 11                                                                            | IPI:IPI00336324.11 | Gene_Symbol=Mdh1 Malate dehydrogenase, cytoplasmic                                    | 1.01 $\pm$ 0.3                                | 0.39 $\pm$ 0.06                              |
| 12                                                                            | IPI:IPI00123613.1  | Gene_Symbol=Pacsin1 Protein kinase C and casein kinase substrate in neurons protein 1 | 1.18 $\pm$ 0.56                               | 0.44 $\pm$ 0.03                              |
| 13                                                                            | IPI:IPI00471441.1  | Gene_Symbol=Ptms Ptms protein                                                         | 0.92 $\pm$ 0.34                               | 0.47 $\pm$ 0.02                              |
| 14                                                                            | IPI:IPI00469317.4  | Gene_Symbol=Sars Seryl-tRNA synthetase, cytoplasmic                                   | 0.81 $\pm$ 0.17                               | 0.52 $\pm$ 0.06                              |
| 15                                                                            | IPI:IPI00124692.1  | Gene_Symbol=Taldo1 Transaldolase                                                      | 1.09 $\pm$ 0.5                                | 0.52 $\pm$ 0.09                              |
| 16                                                                            | IPI:IPI00459493.5  | Gene_Symbol=Tcp1 Isoform 1 of T-complex protein 1 subunit alpha                       | 1.36 $\pm$ 0.36                               | 0.56 $\pm$ 0.04                              |
| 17                                                                            | IPI:IPI00118384.1  | Gene_Symbol=Ywhae 14-3-3 protein epsilon                                              | 0.91 $\pm$ 0.32                               | 0.47 $\pm$ 0.01                              |
| <b>Myopic vs control: no change, after atropine treatment: up-regulated</b>   |                    |                                                                                       |                                               |                                              |
| 1                                                                             | IPI:IPI00121198.2  | Gene_Symbol=Gtf2a1 Transcription initiation factor IIA subunit 1                      | 1.08 $\pm$ 0.3                                | 1.93 $\pm$ 0.06                              |
| 2                                                                             | IPI:IPI00222557.5  | Gene_Symbol=S100b Protein S100-B                                                      | 1.23 $\pm$ 0.07                               | 2.7 $\pm$ 0.57                               |
